# Supplementary material for: A new method for estimating megacity NO x emissions and lifetimes from satellite observations
Source: Copernicus journal article supplement (doi:10.5194/amt-17-3439-2024), 2024-06-05

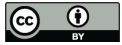

*Supplement of*

## **A new method for estimating megacity $\text{NO}_x$ emissions and lifetimes from satellite observations**

**Steffen Beirle and Thomas Wagner**

*Correspondence to:* Steffen Beirle ([steffen.beirle@mpic.de](mailto:steffen.beirle@mpic.de))

The copyright of individual parts of the supplement might differ from the article licence.

This Supplement provides (a) seasonal maps of  $\text{NO}_x$  for different wind directions, and (b) the respective line densities and fit results, for the 100 cities listed in table 1 where lifetime/emission estimates were possible.

The following colormap is used for all VCD maps below:

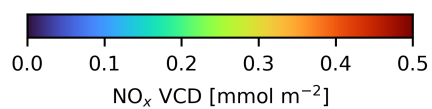

# 1 Delhi

## 1.1 Winter

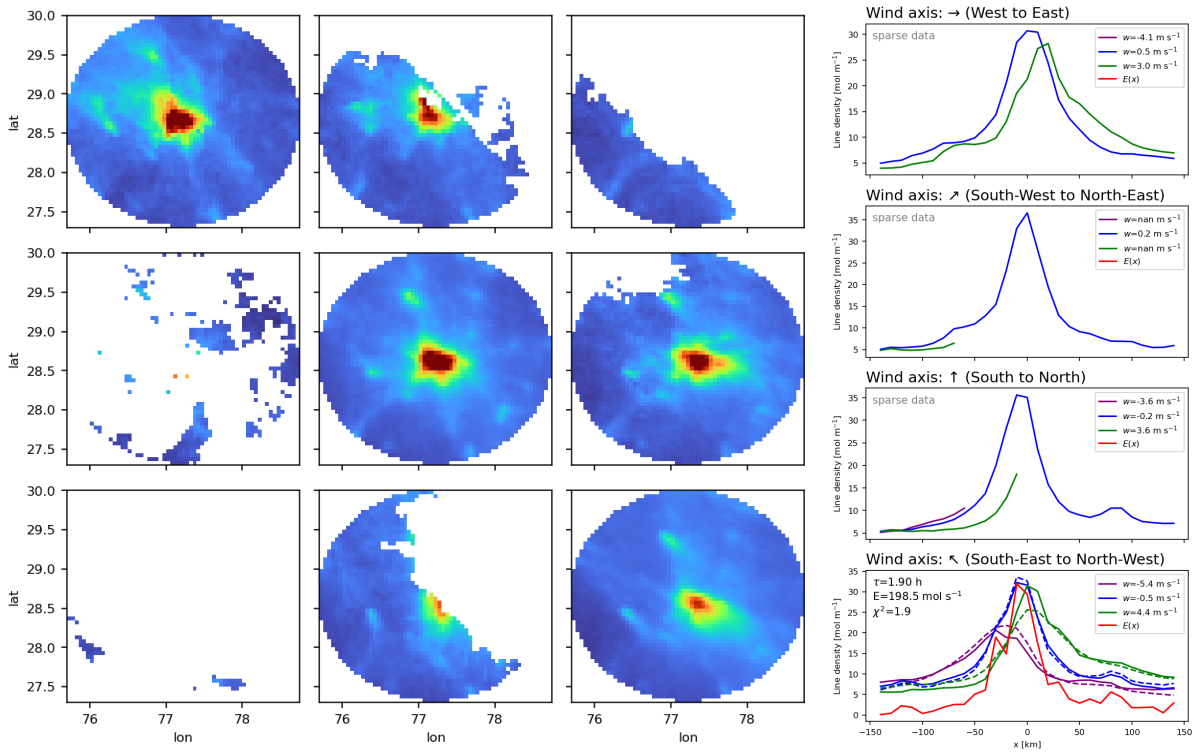

## 1.2 Spring

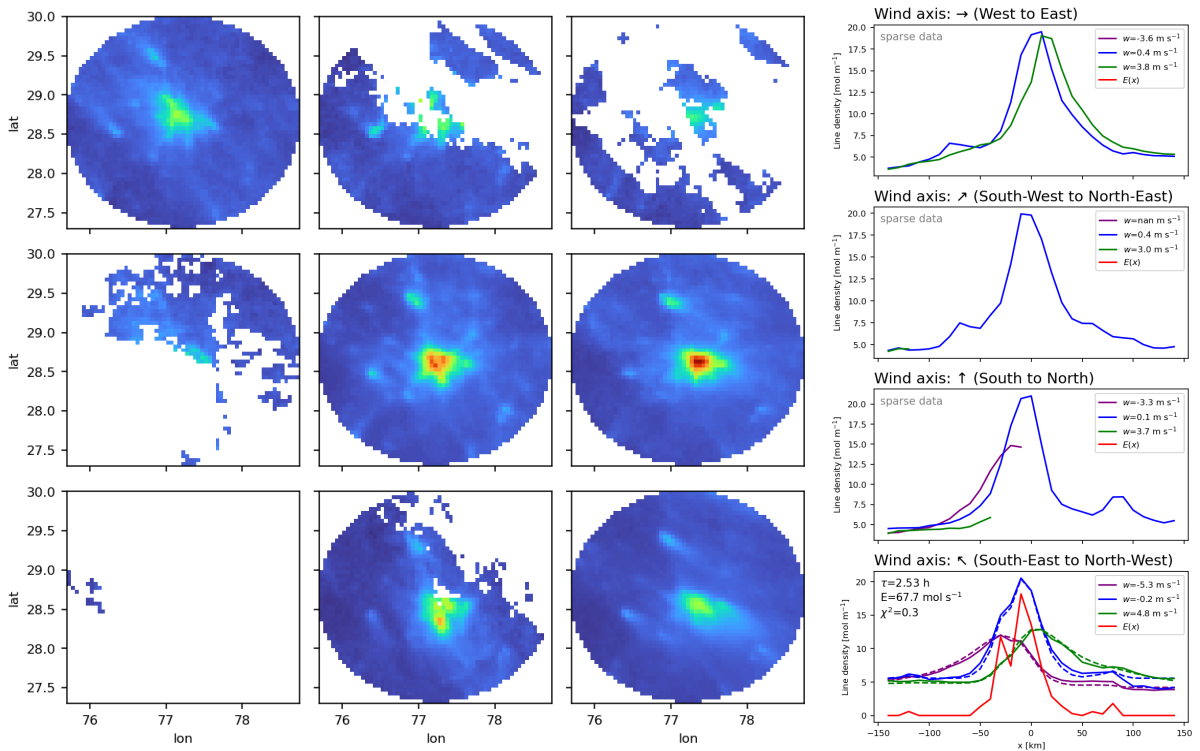

### 1.3 Summer

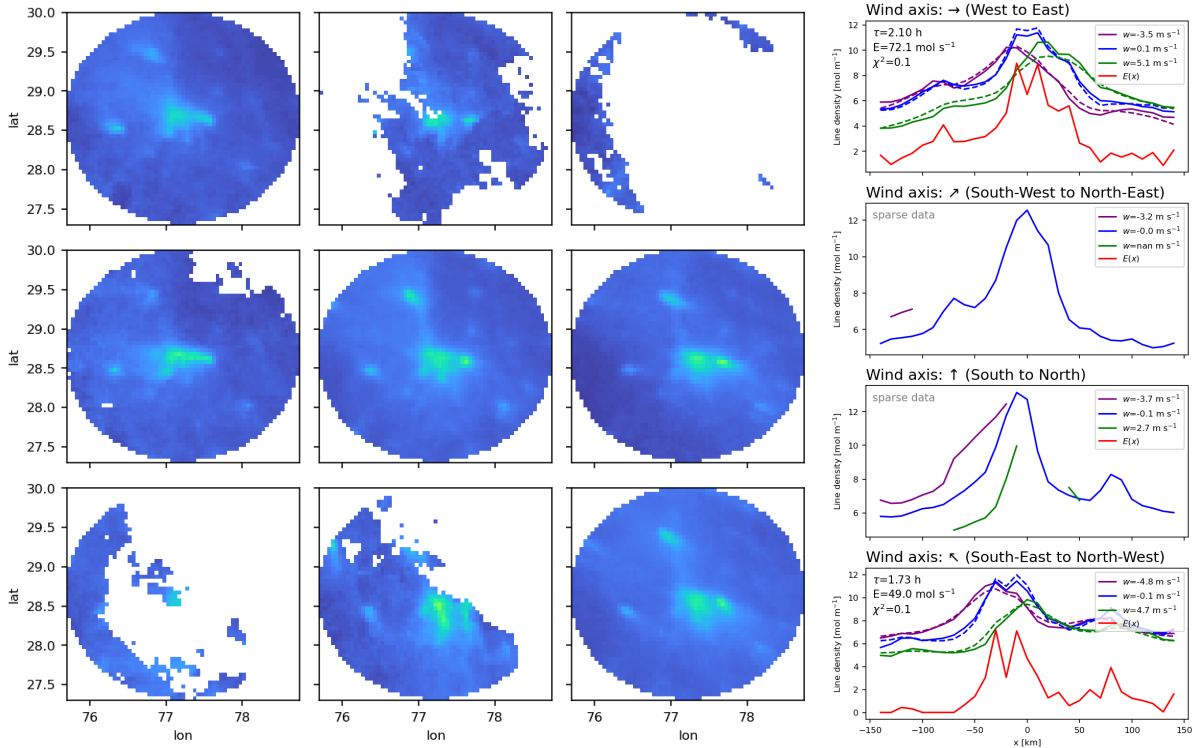

### 1.4 Autumn

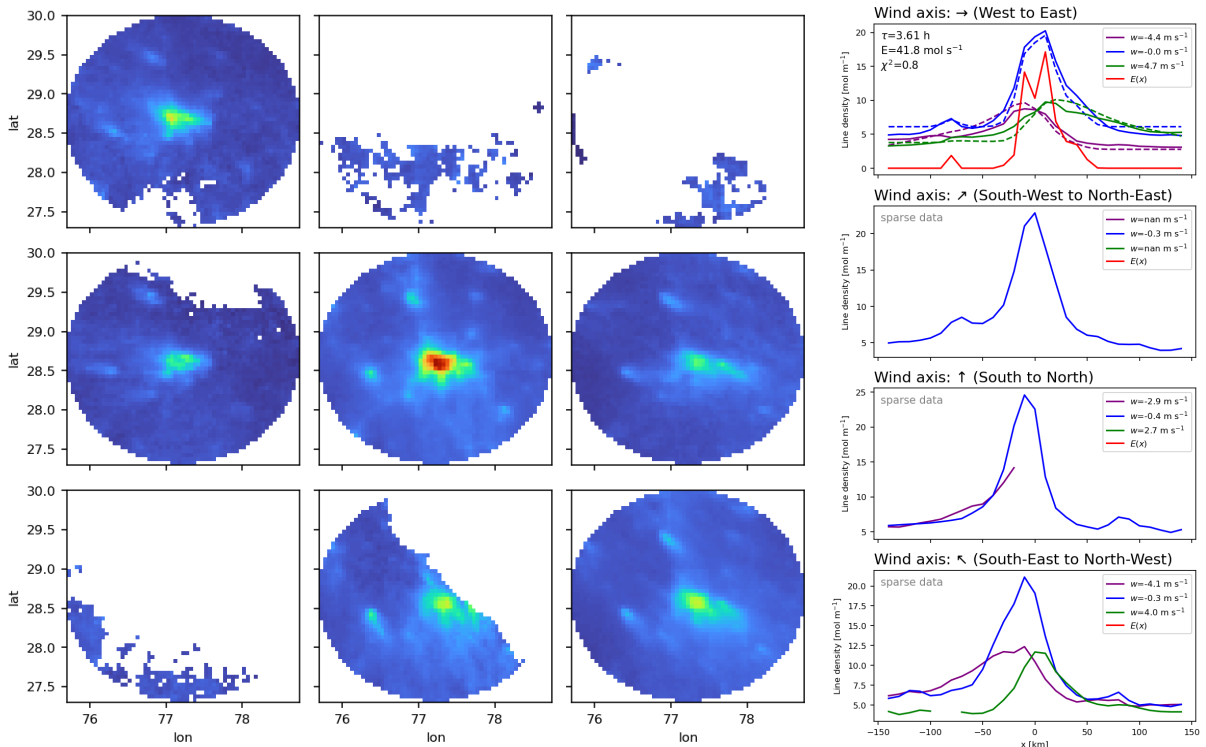

## 2 Seoul

### 2.1 Winter

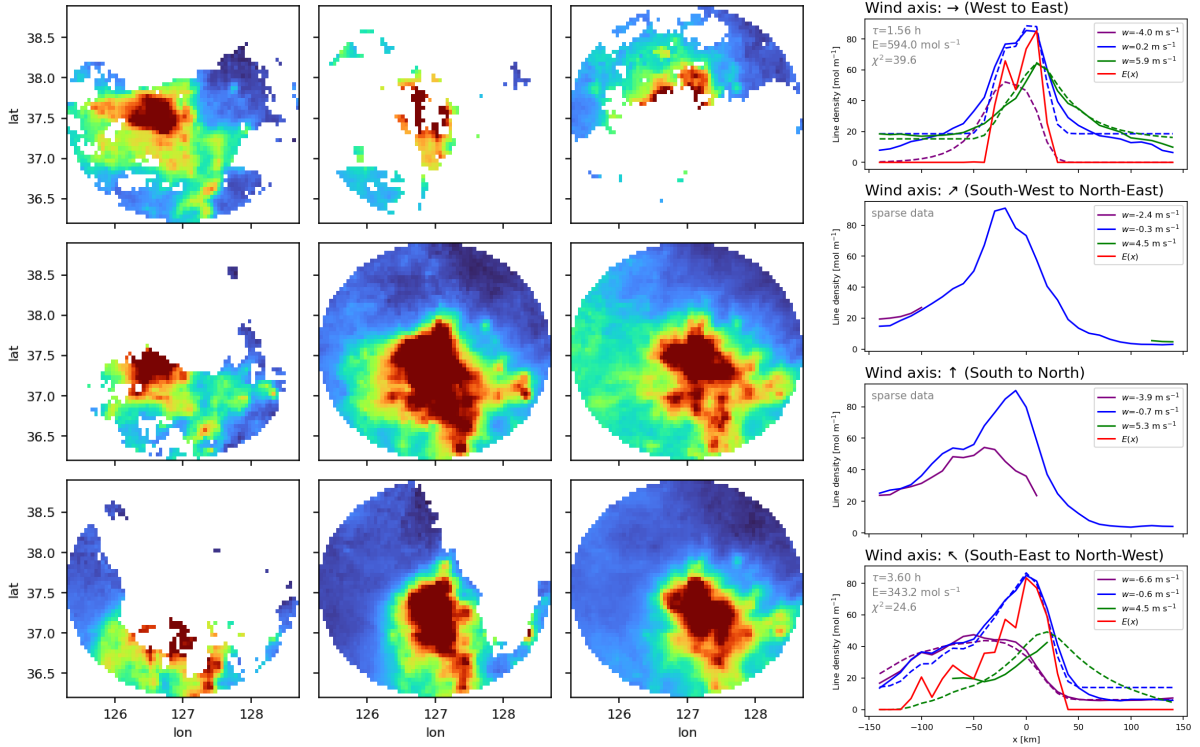

### 2.2 Spring

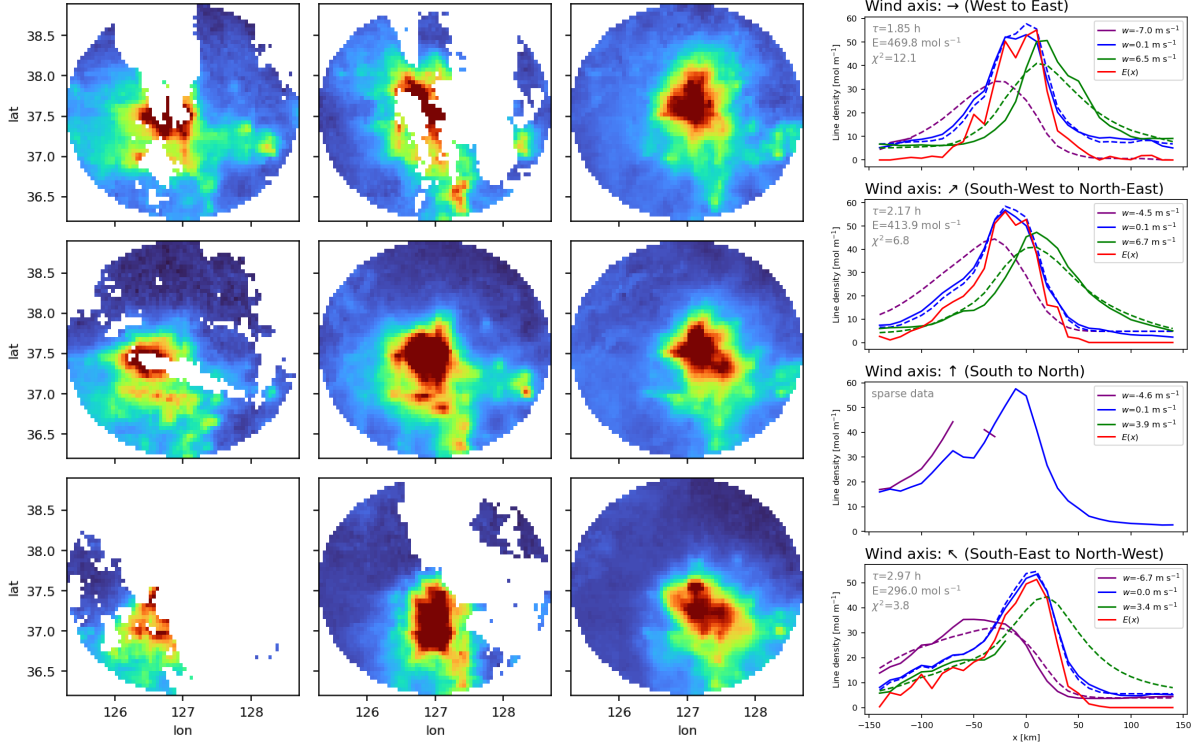

## 2.3 Summer

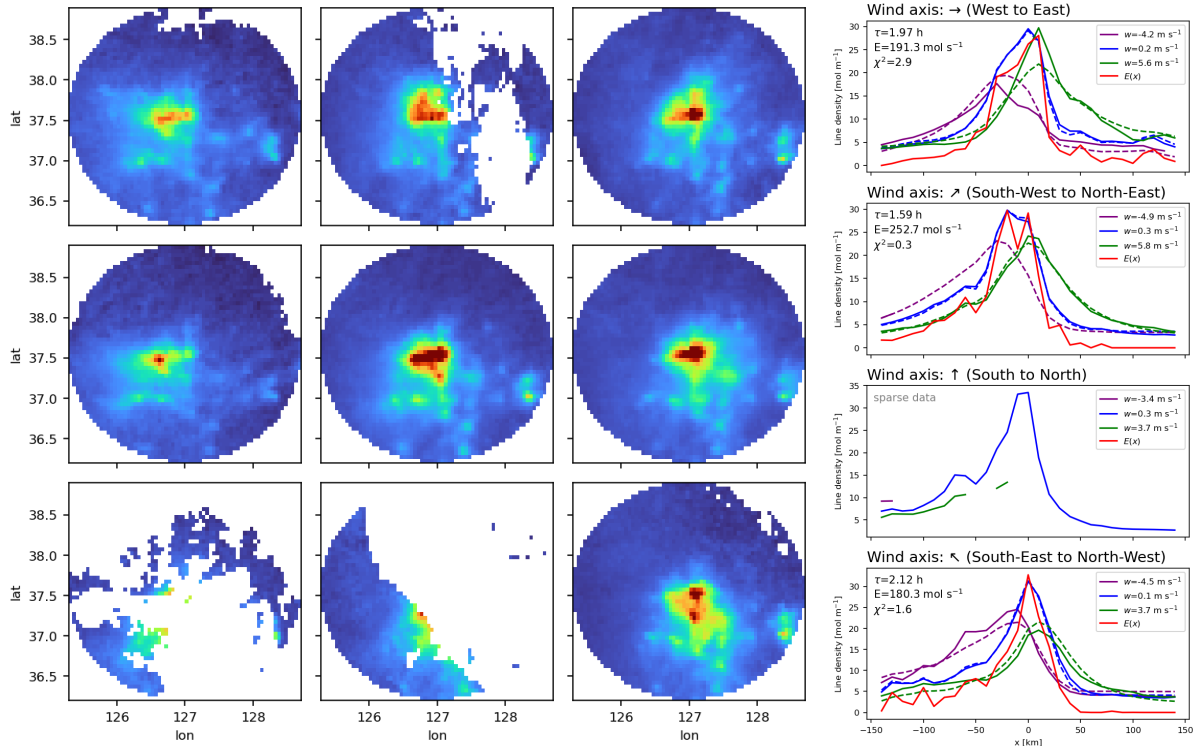

## 2.4 Autumn

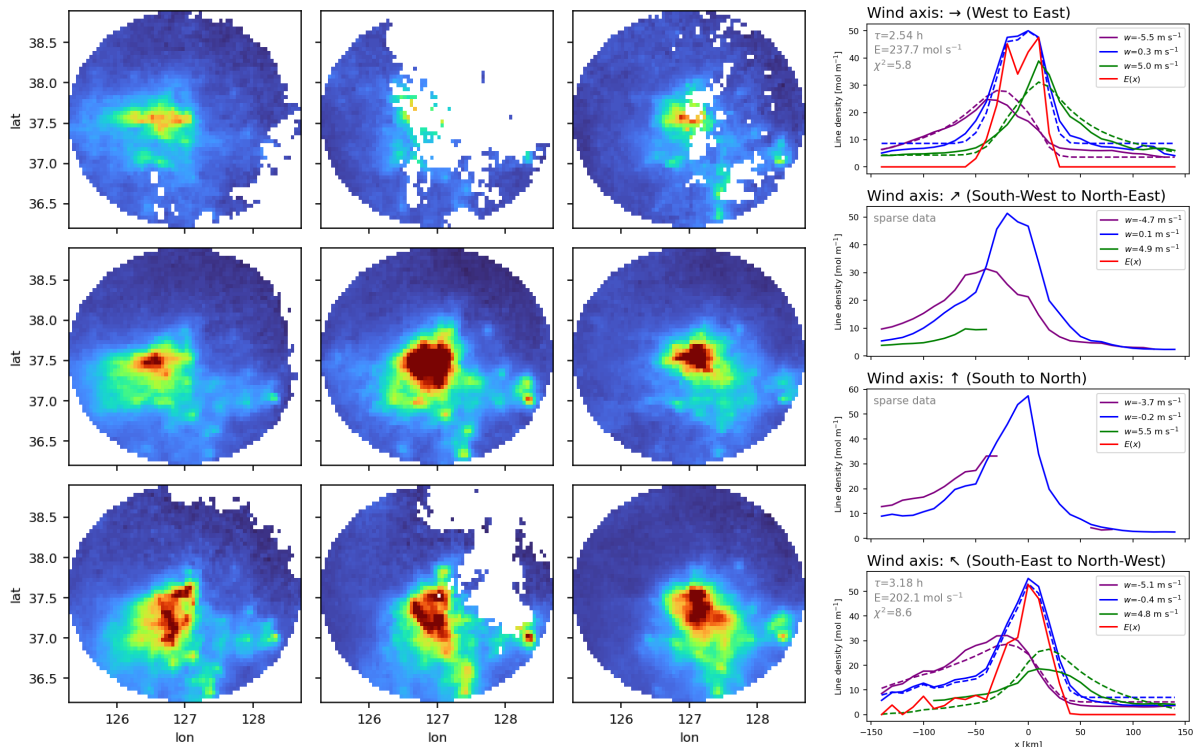

### 3 Cairo

#### 3.1 Winter

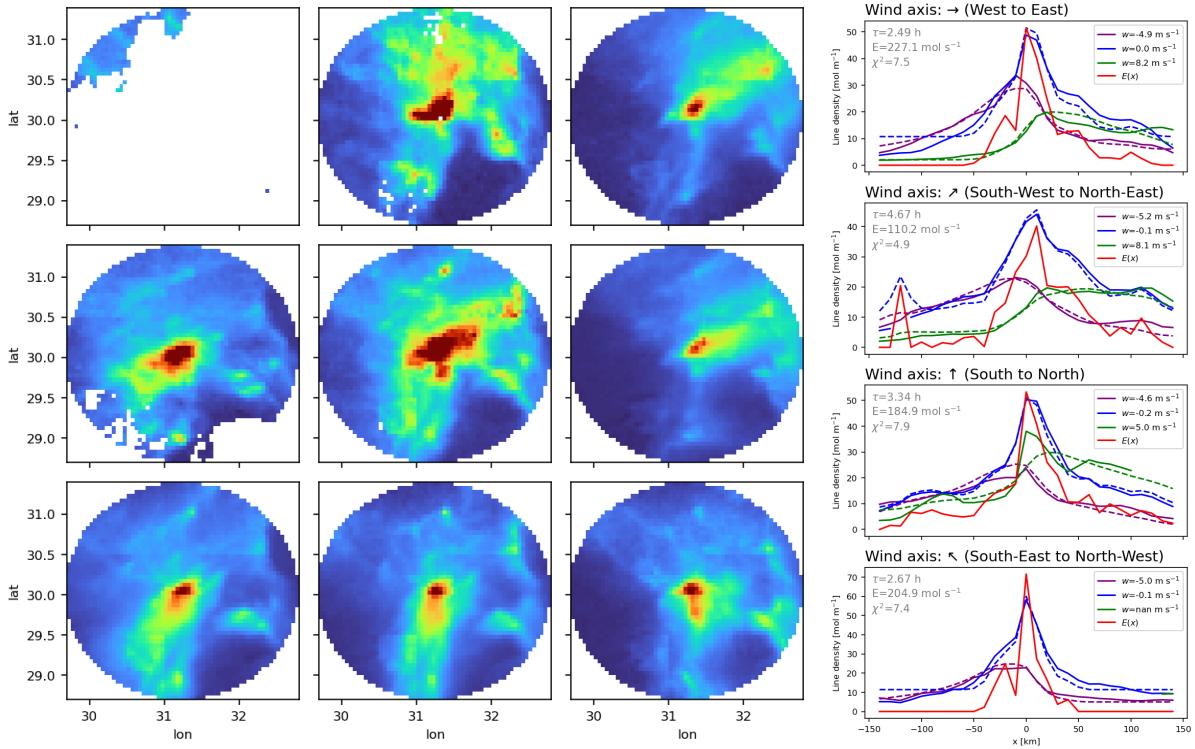

#### 3.2 Spring

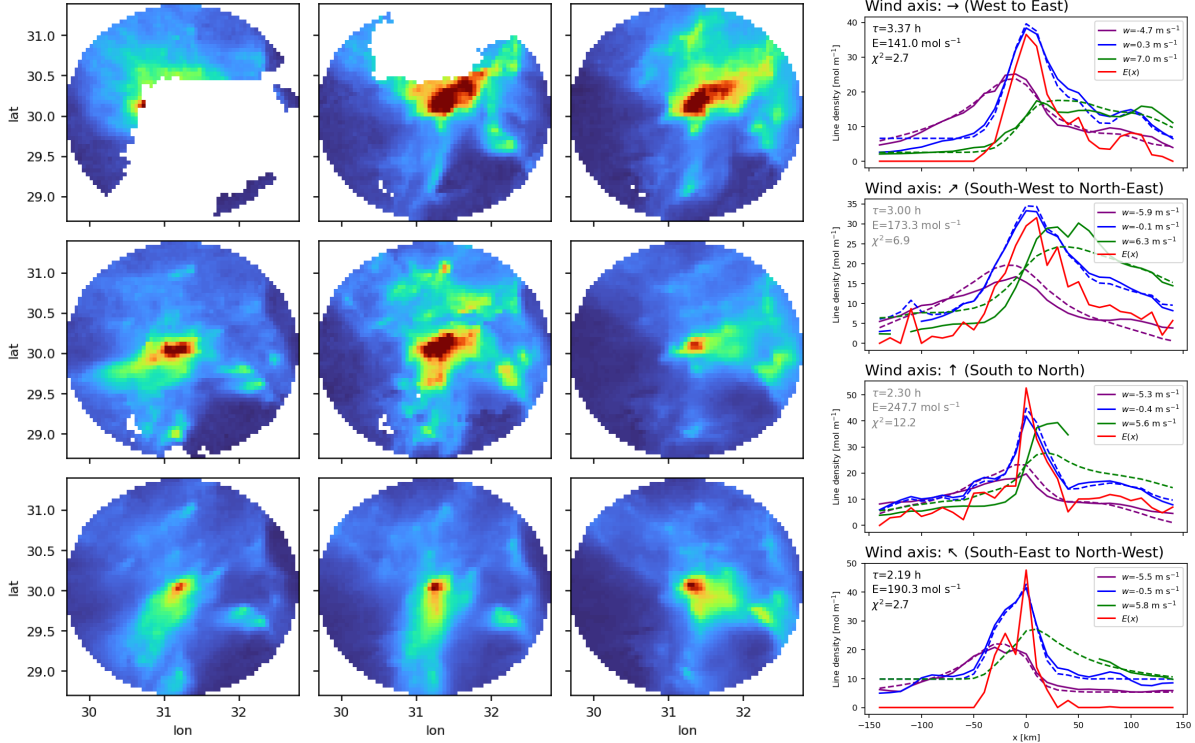

### 3.3 Summer

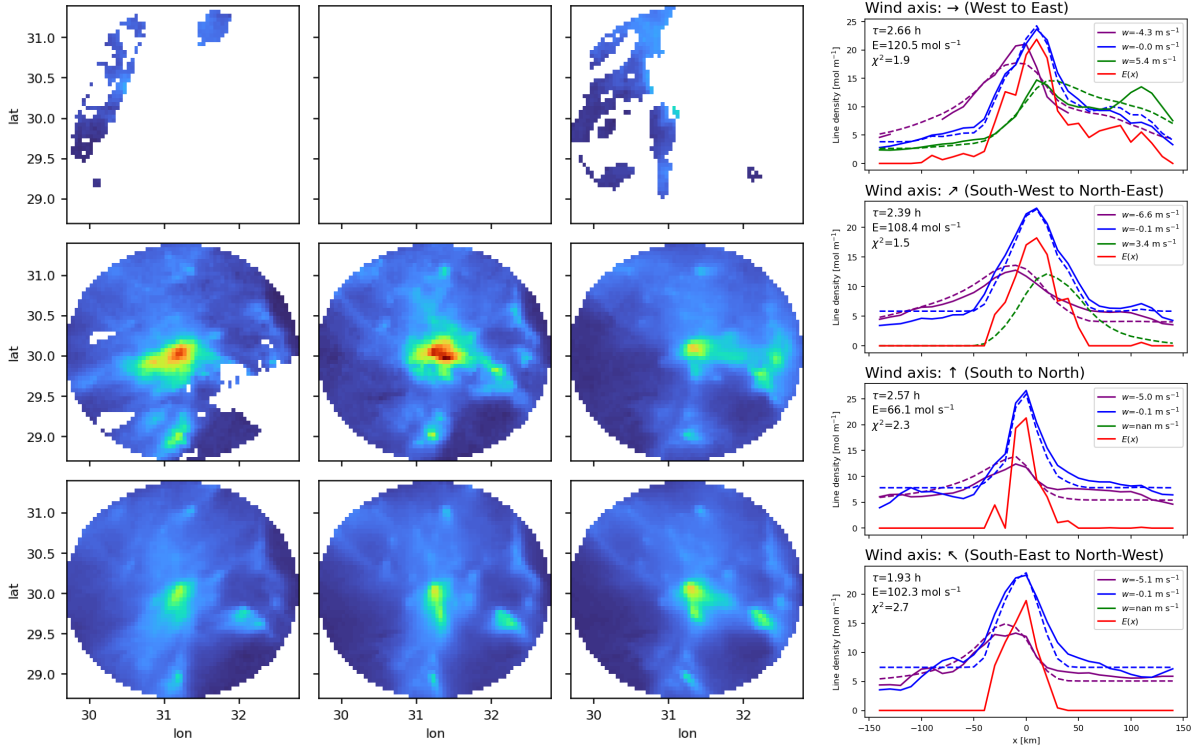

### 3.4 Autumn

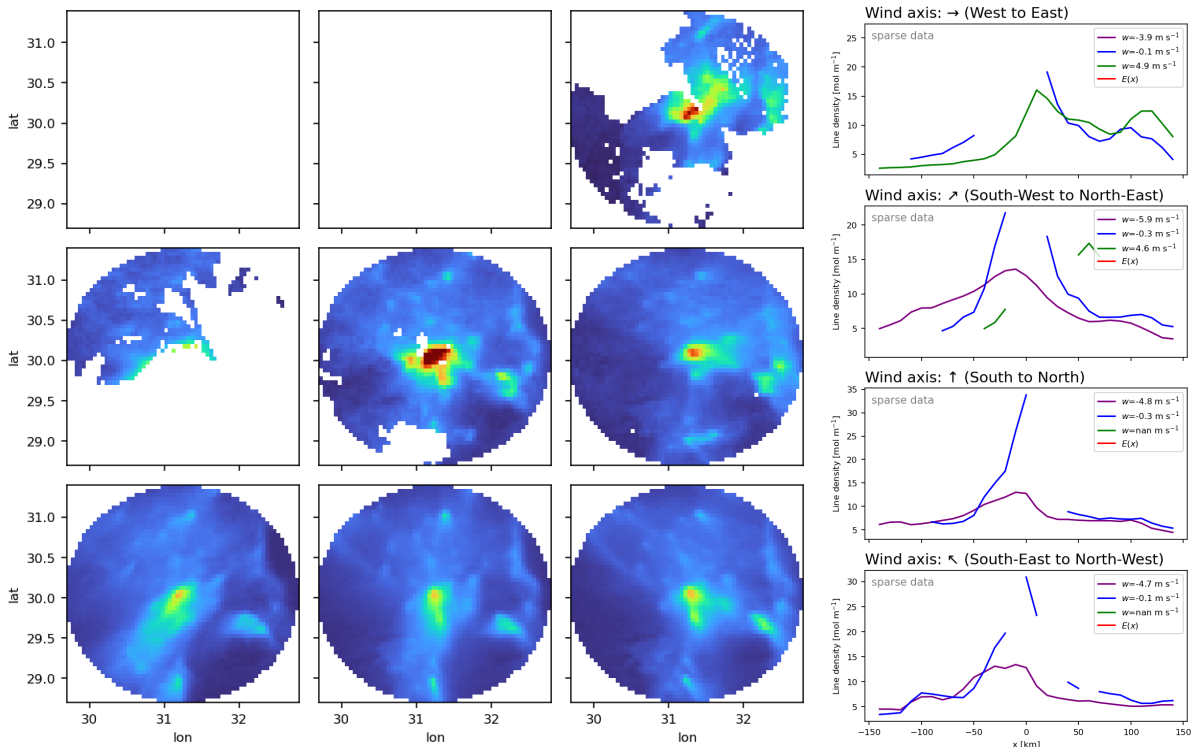



## 4 New York

### 4.1 Winter

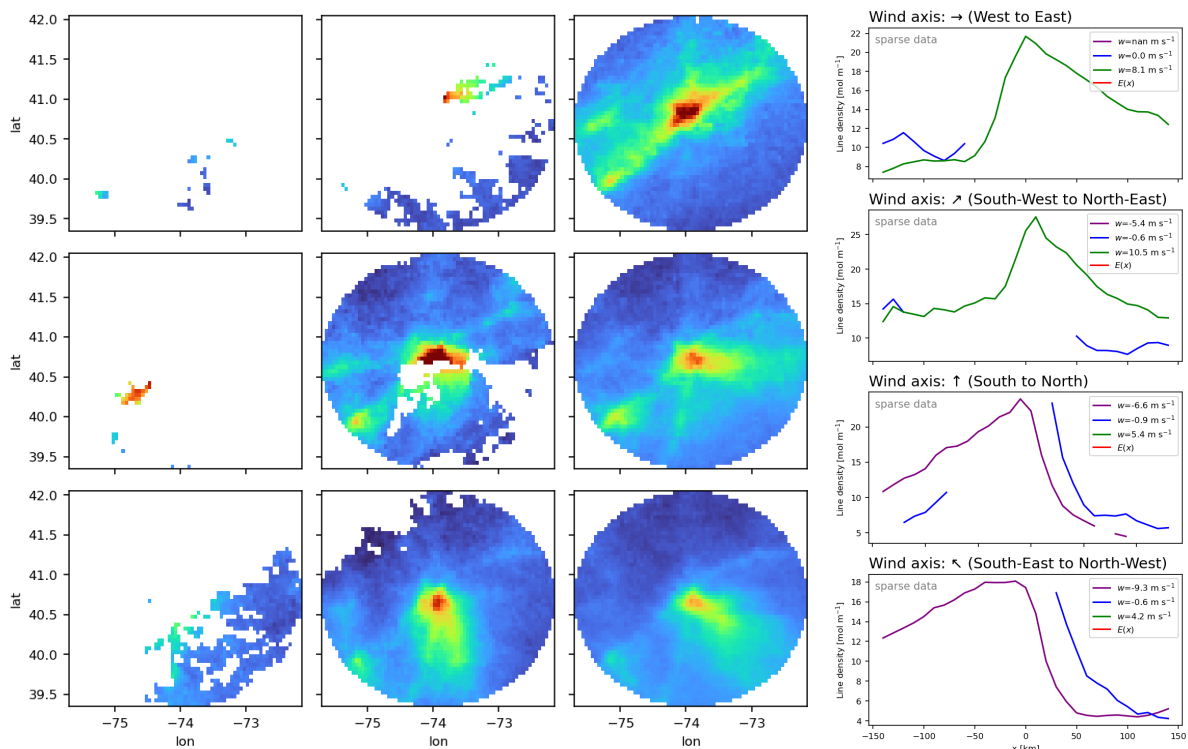

### 4.2 Spring

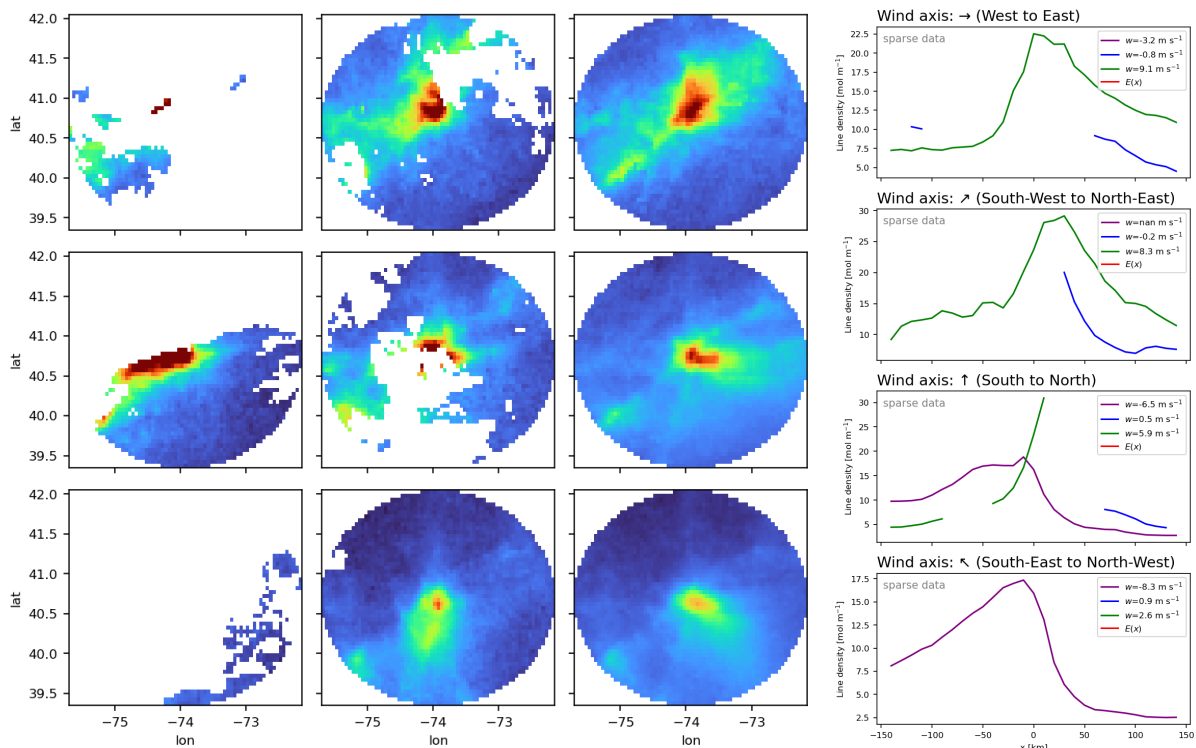

### 4.3 Summer

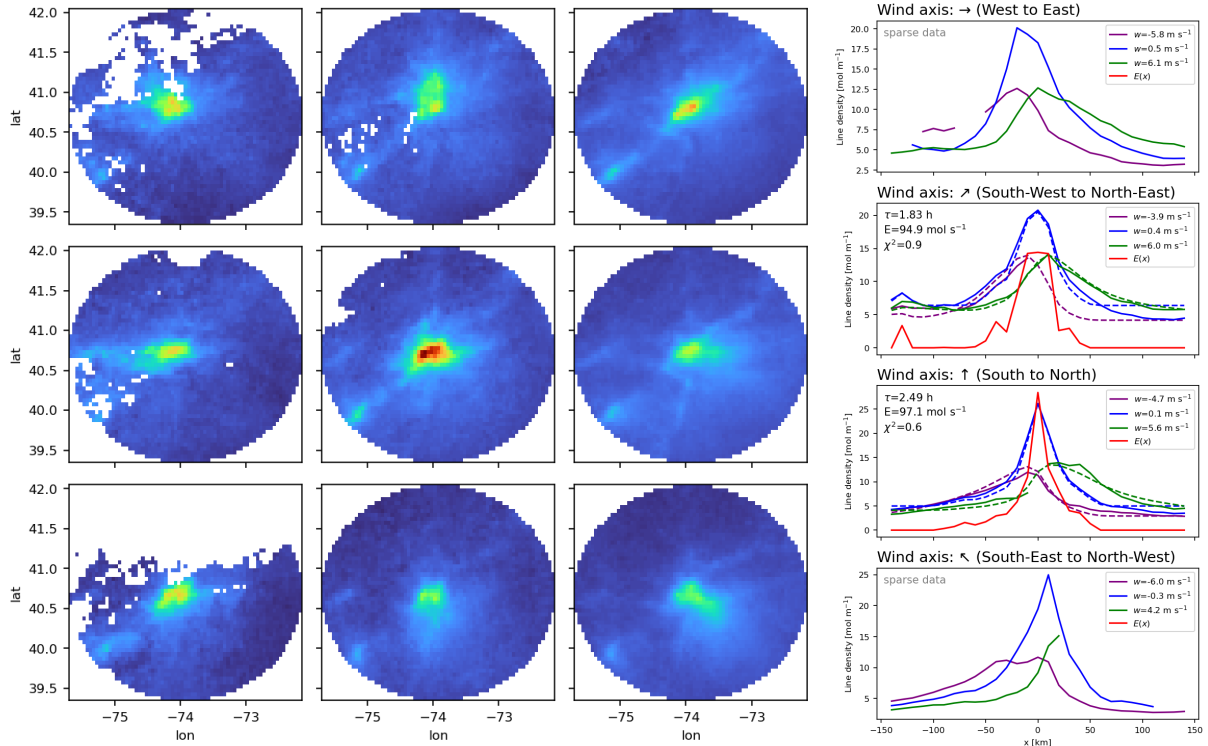

### 4.4 Autumn

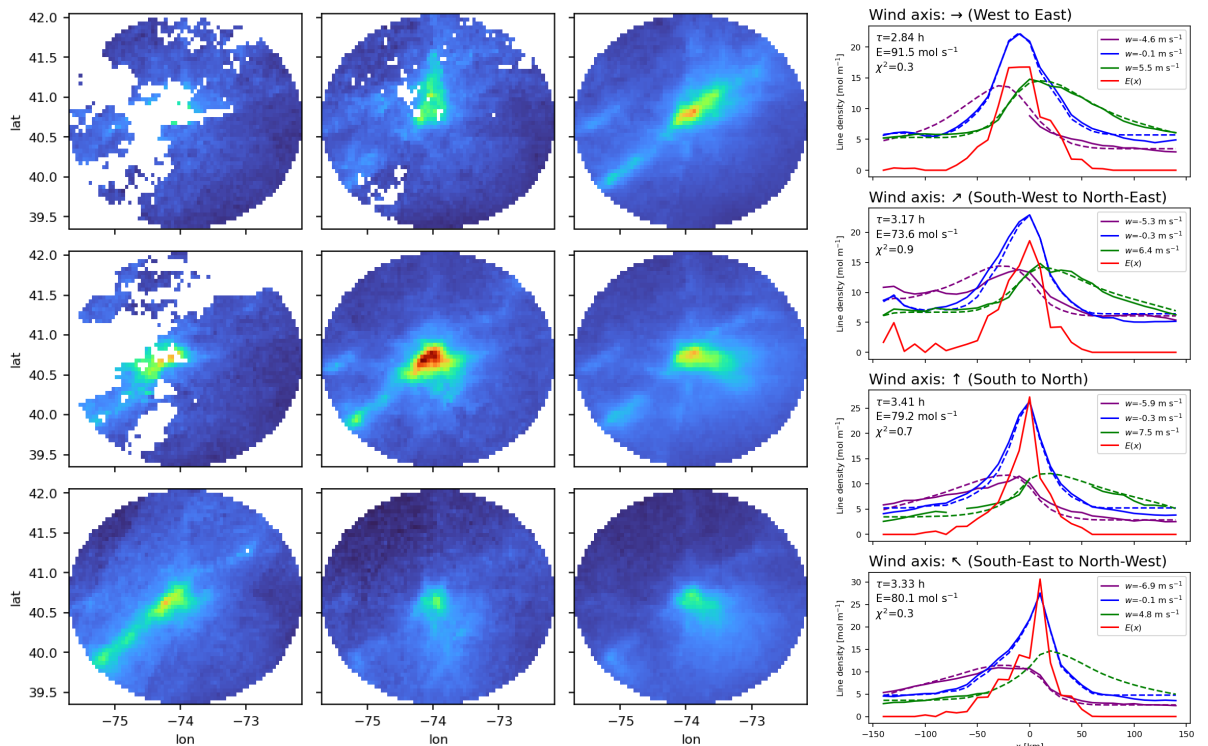

## 5 Moscow

### 5.1 Winter

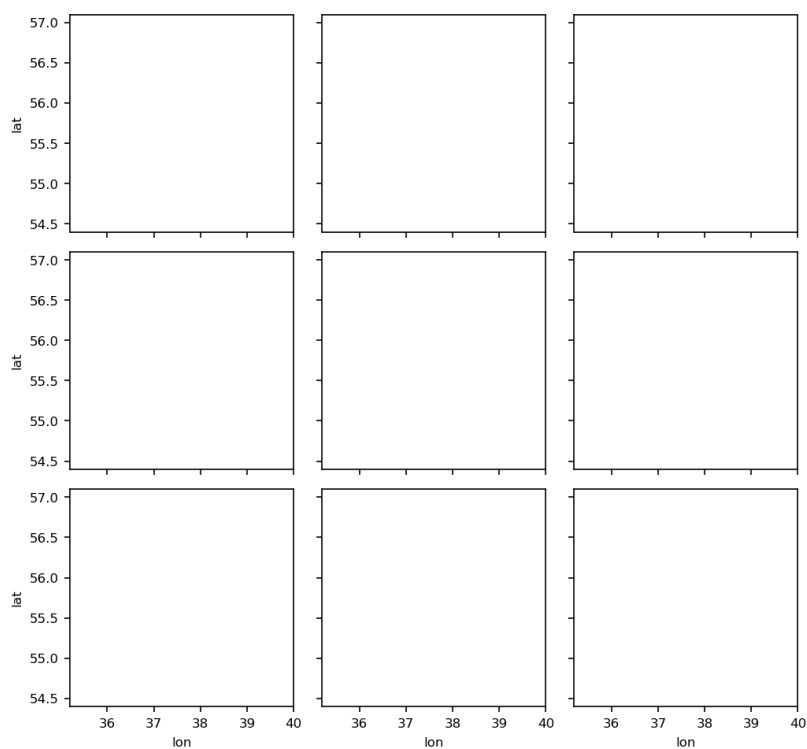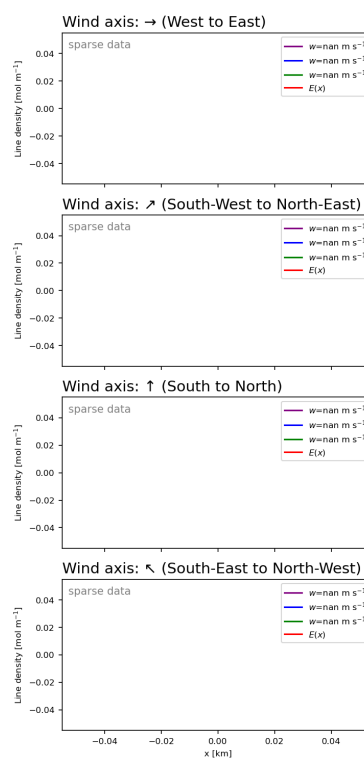

### 5.2 Spring

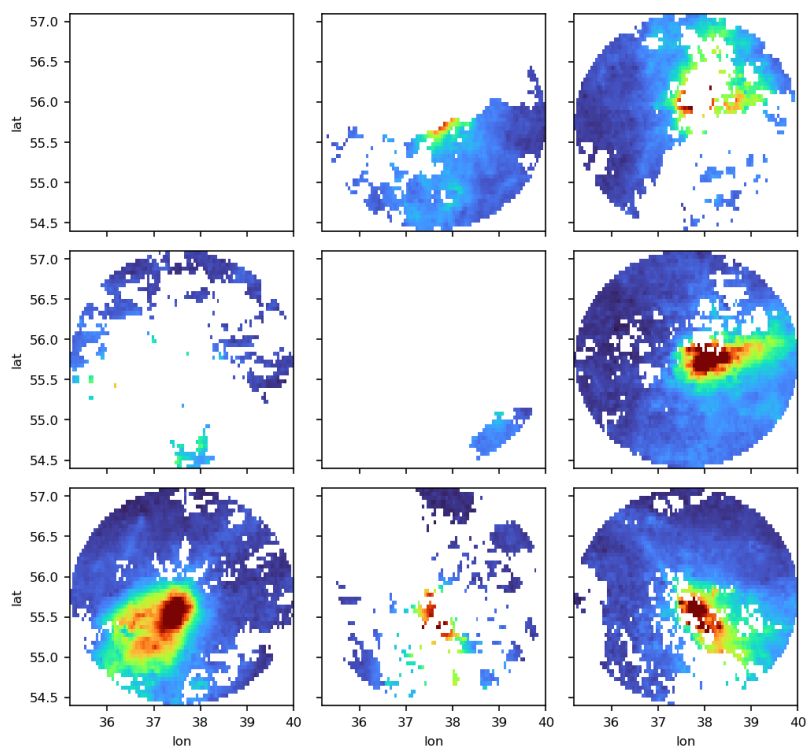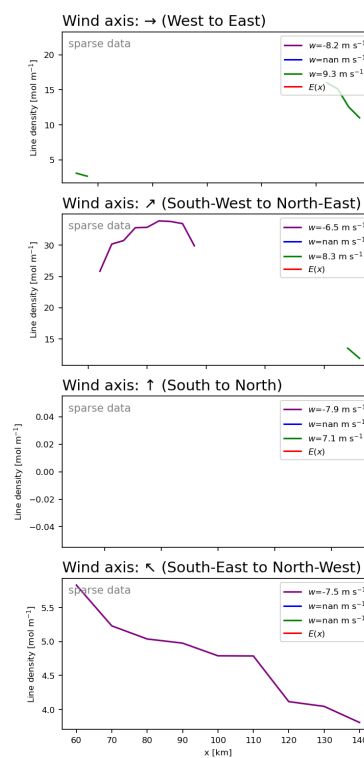

### 5.3 Summer

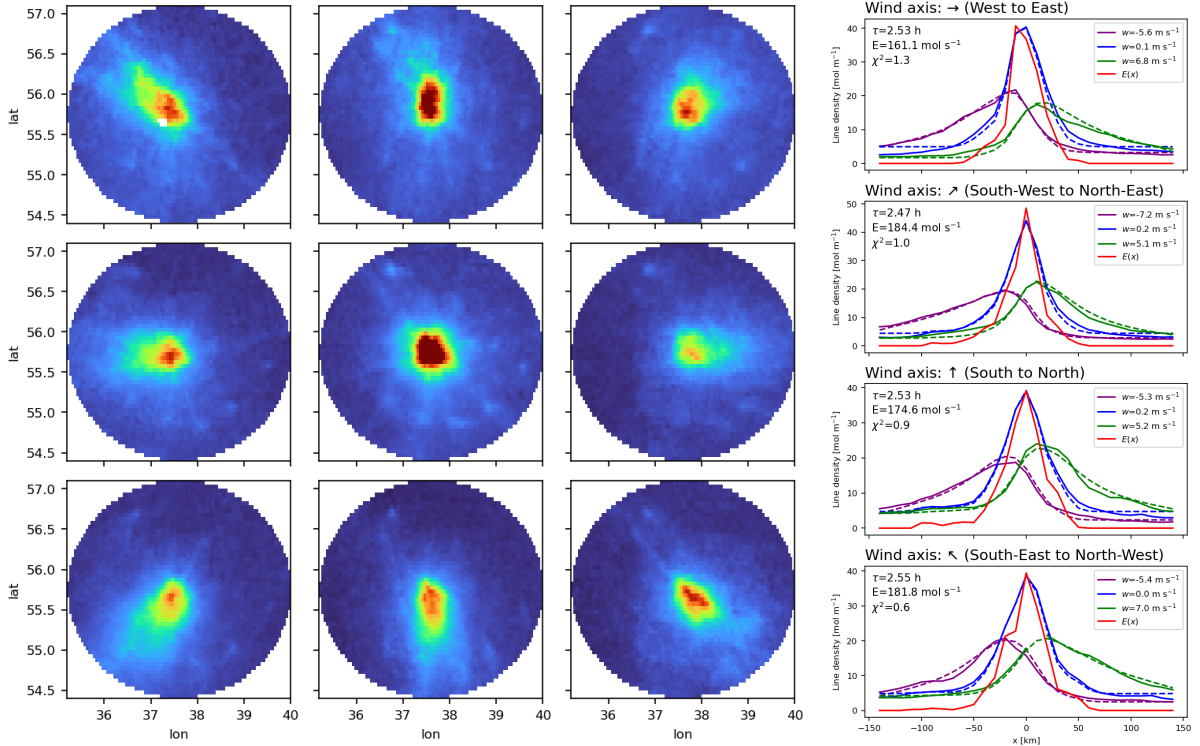

### 5.4 Autumn

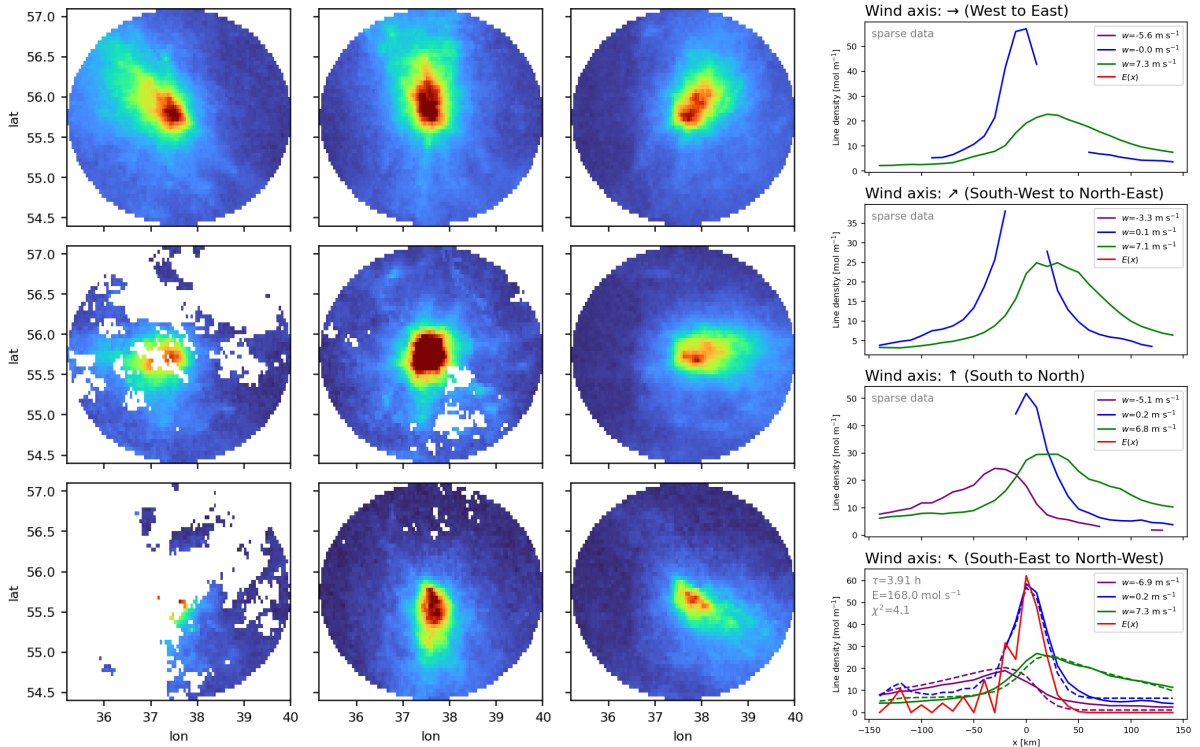

## 6 Buenos Aires

### 6.1 Winter

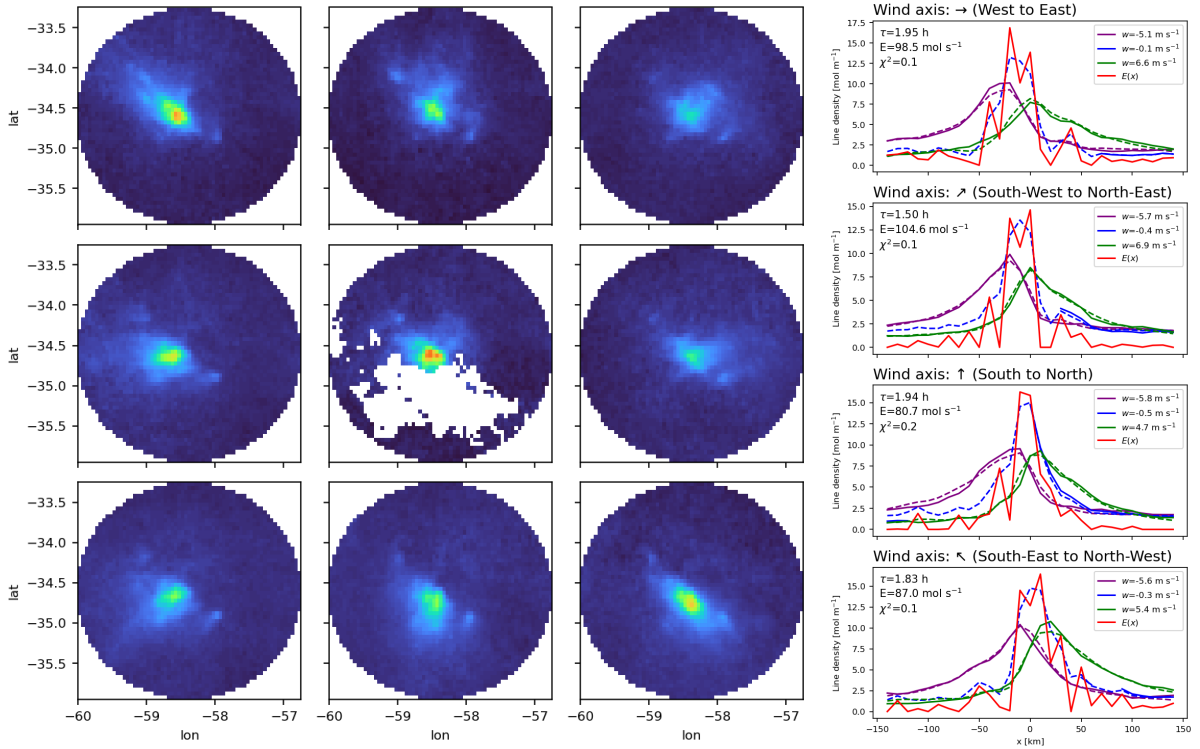

### 6.2 Spring

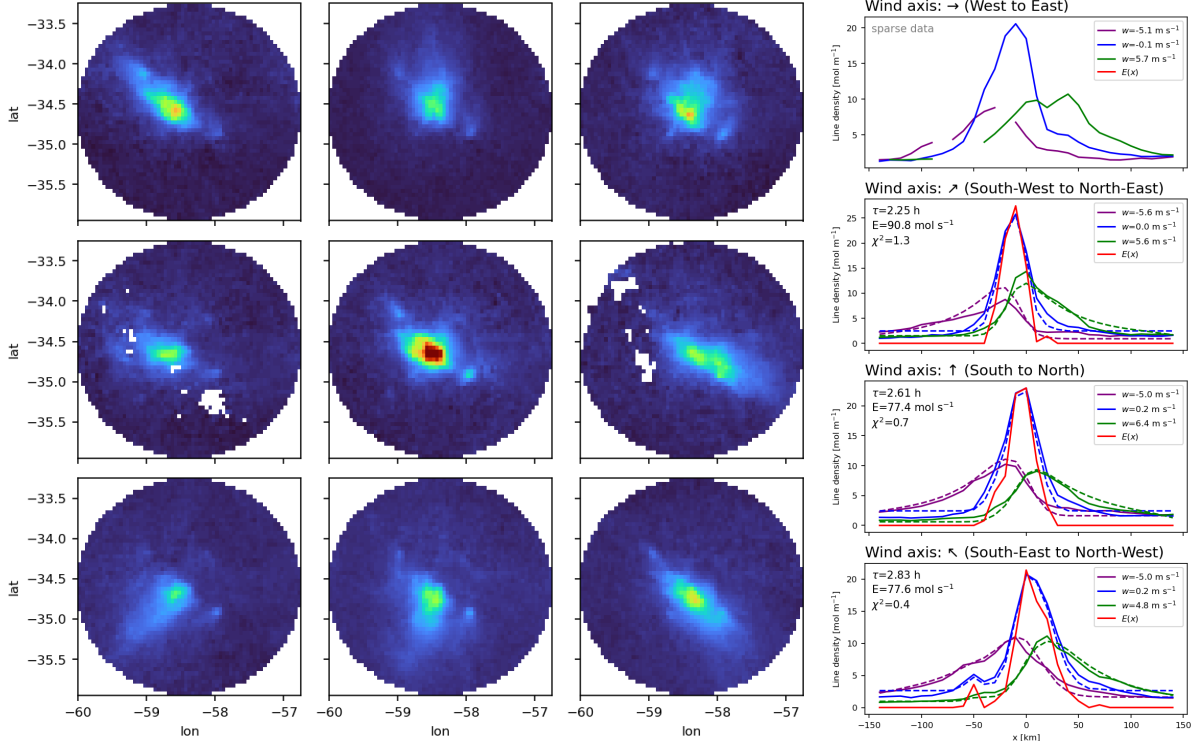

### 6.3 Summer

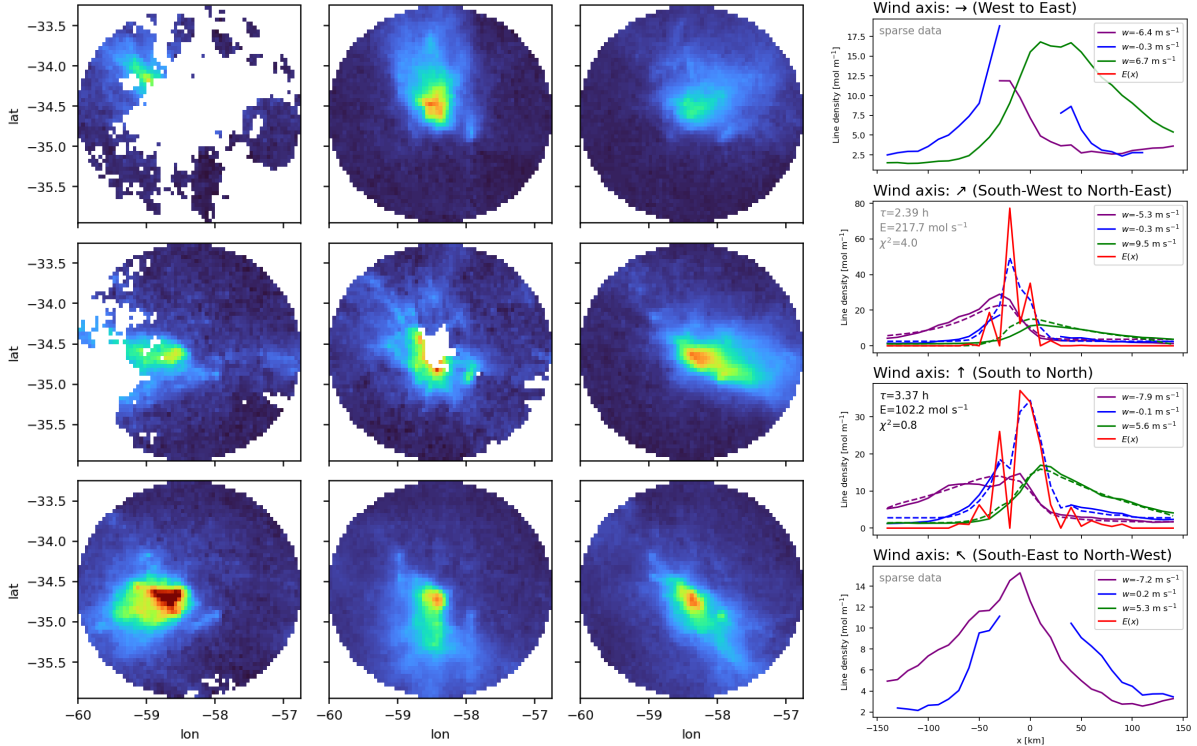

### 6.4 Autumn

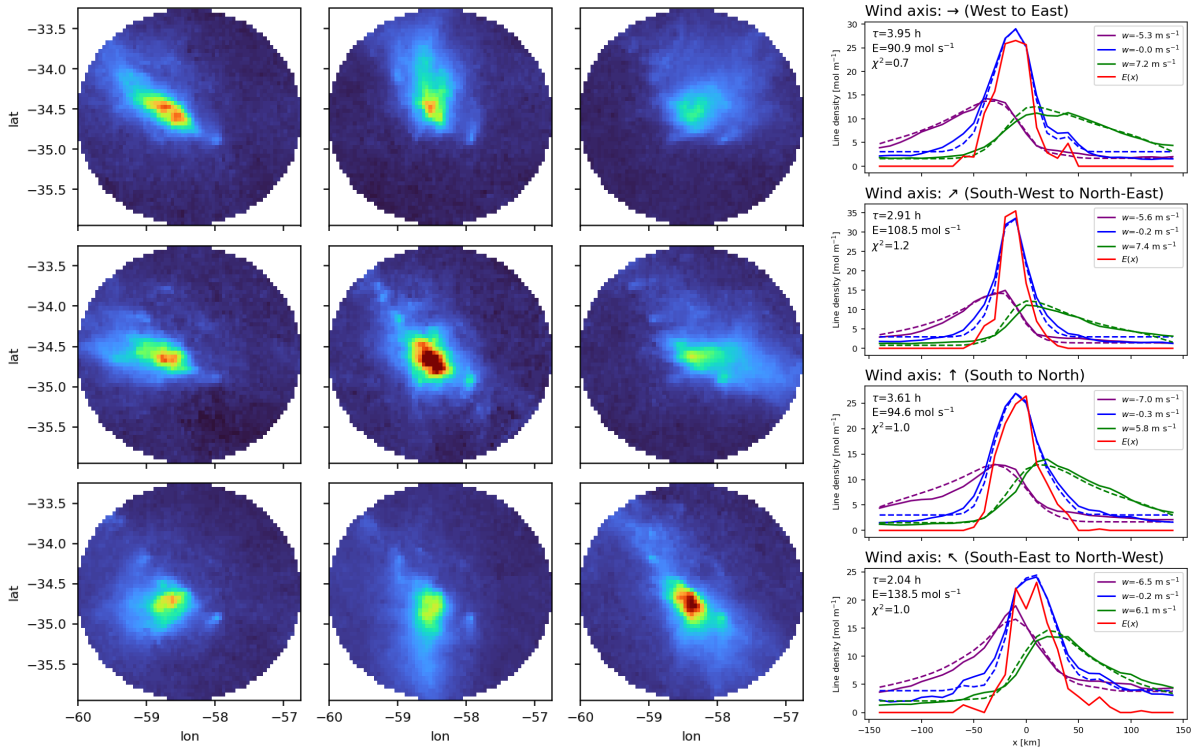

## 7 Istanbul

### 7.1 Winter

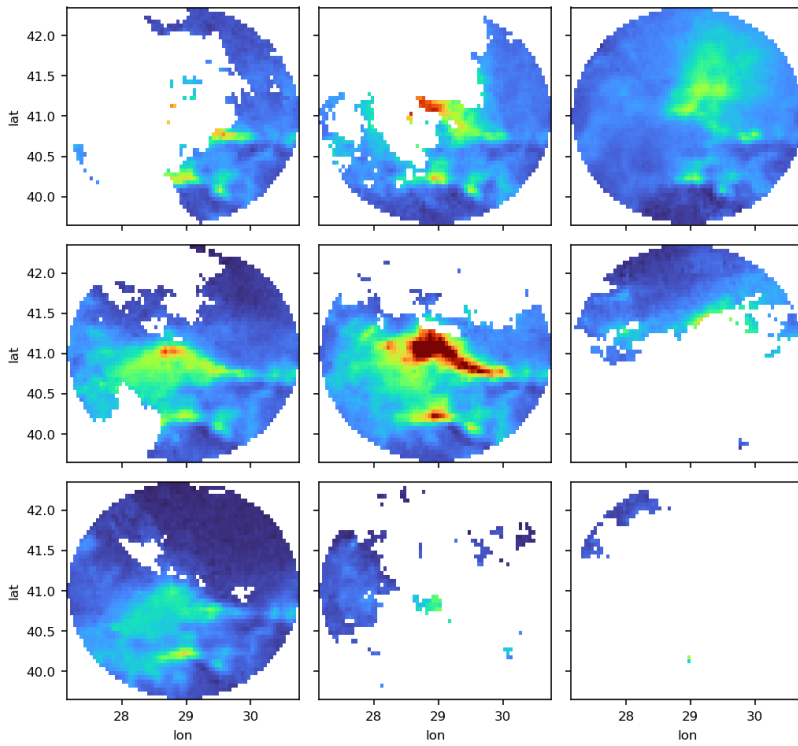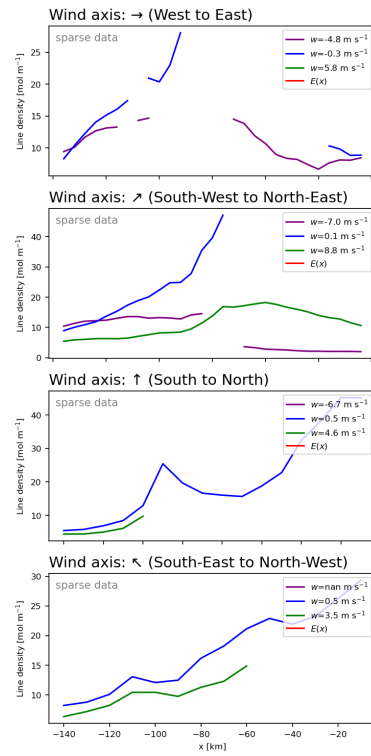

### 7.2 Spring

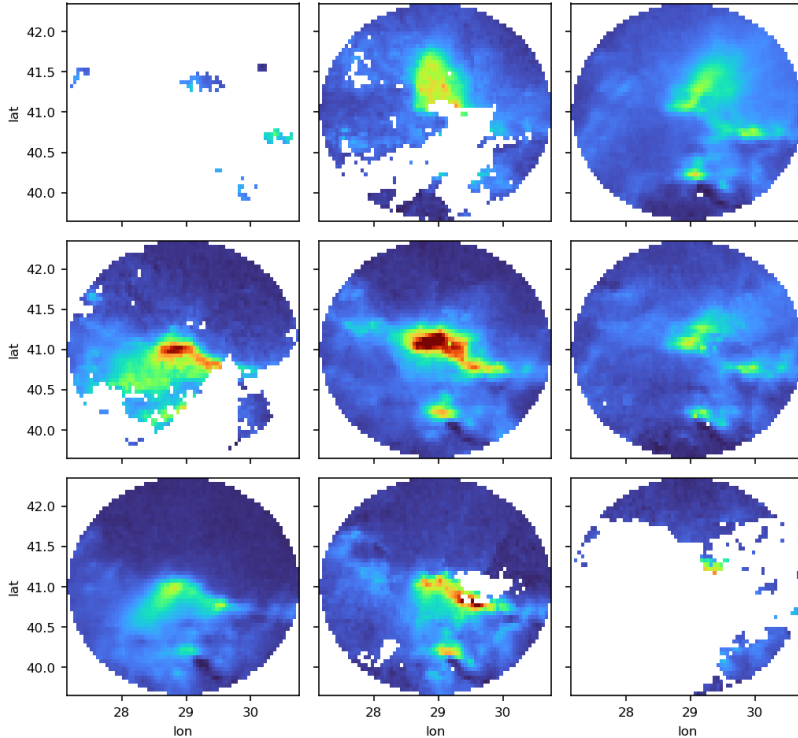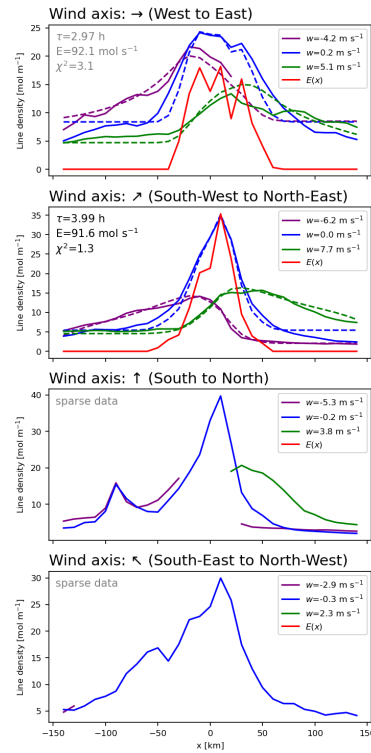

### 7.3 Summer

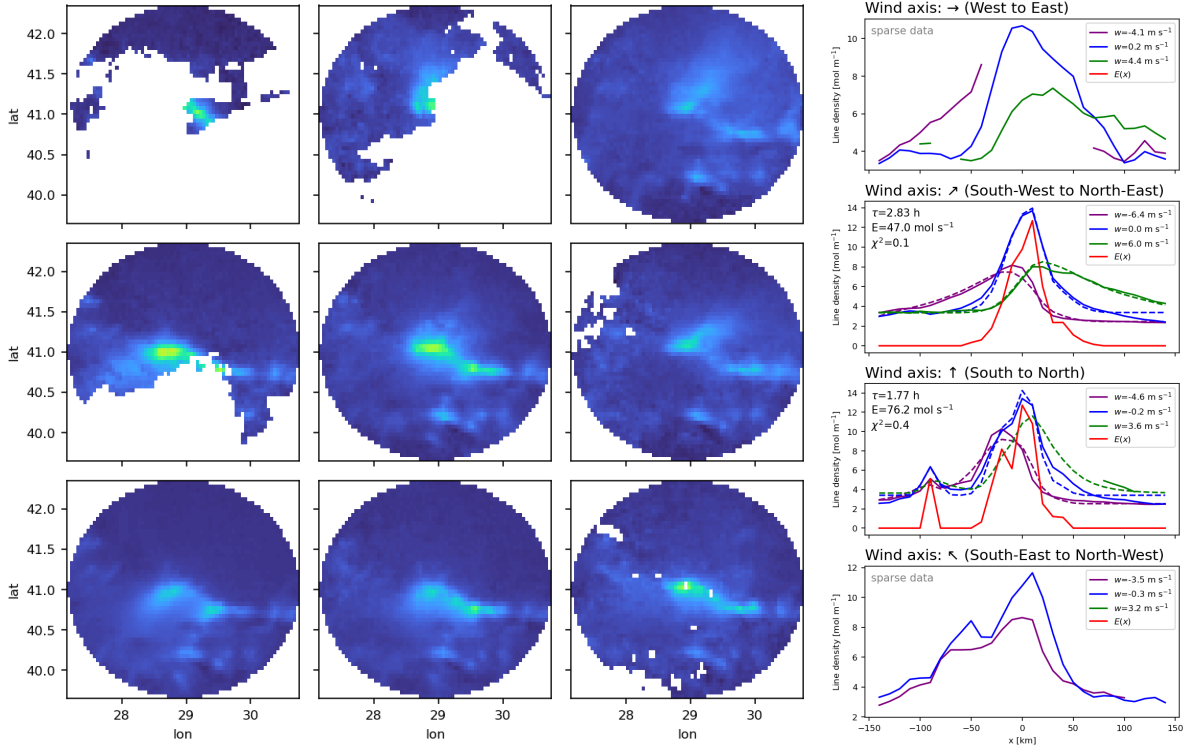

### 7.4 Autumn

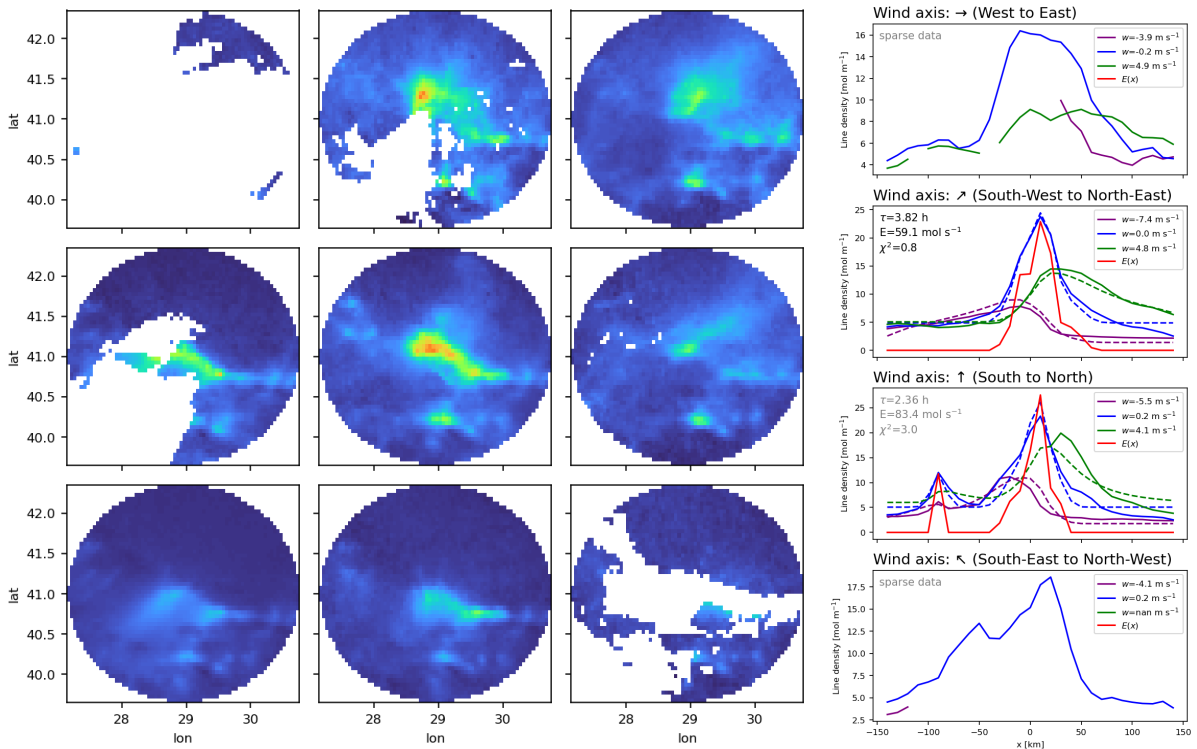



## 8 Karachi

### 8.1 Winter

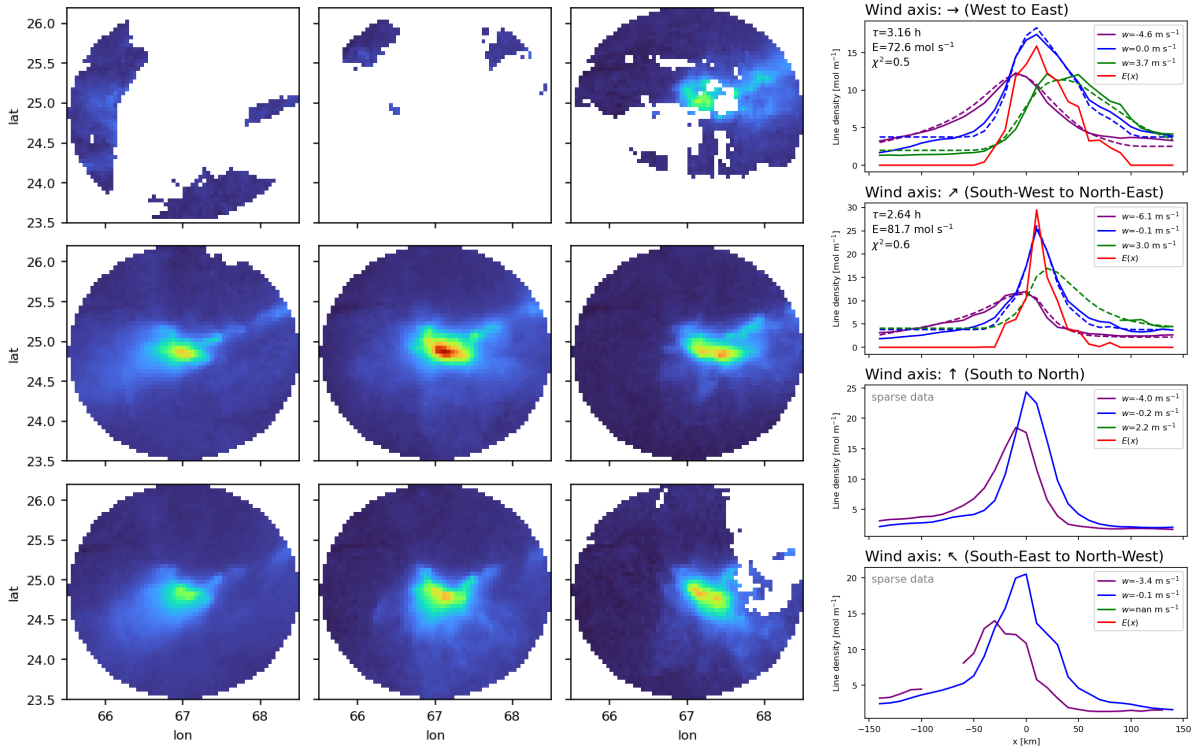

### 8.2 Spring

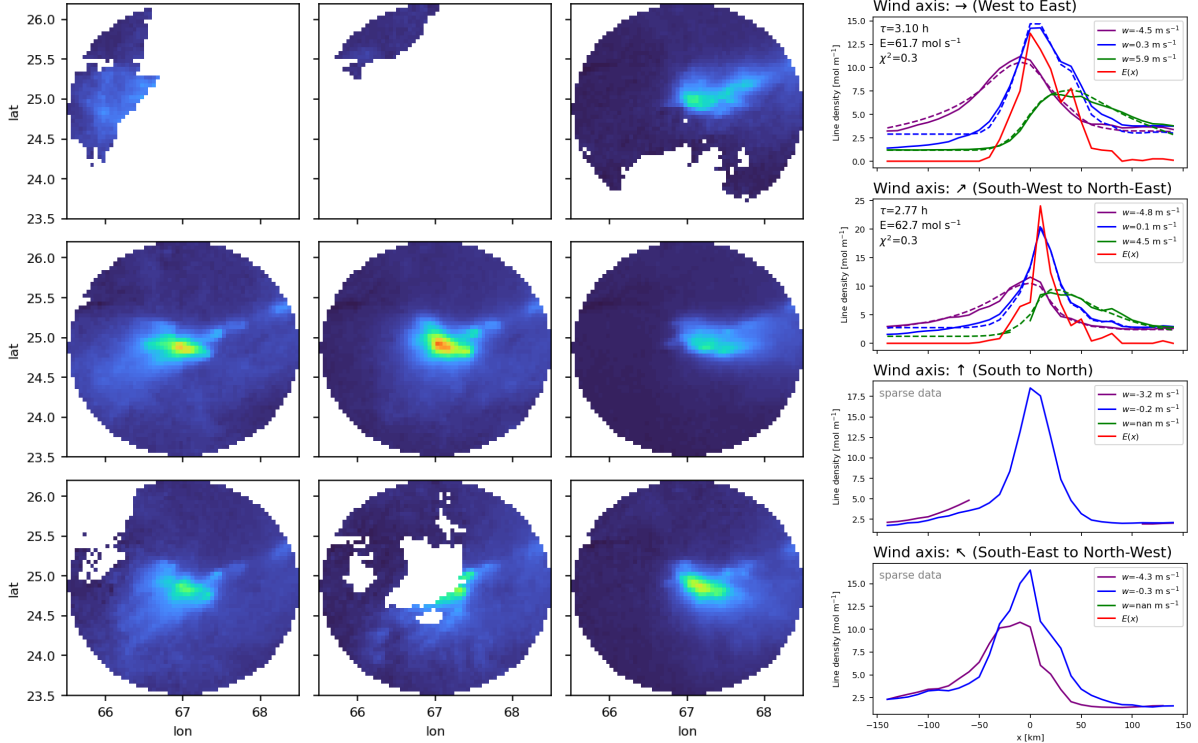

### 8.3 Summer

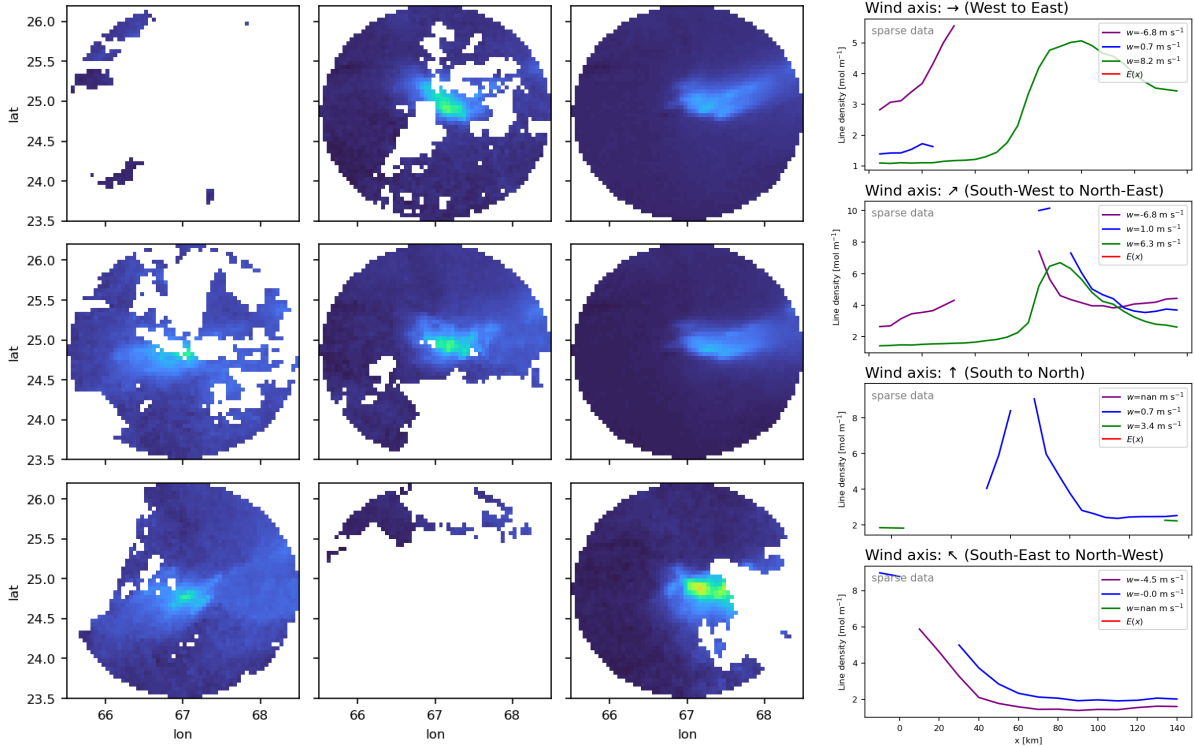

### 8.4 Autumn

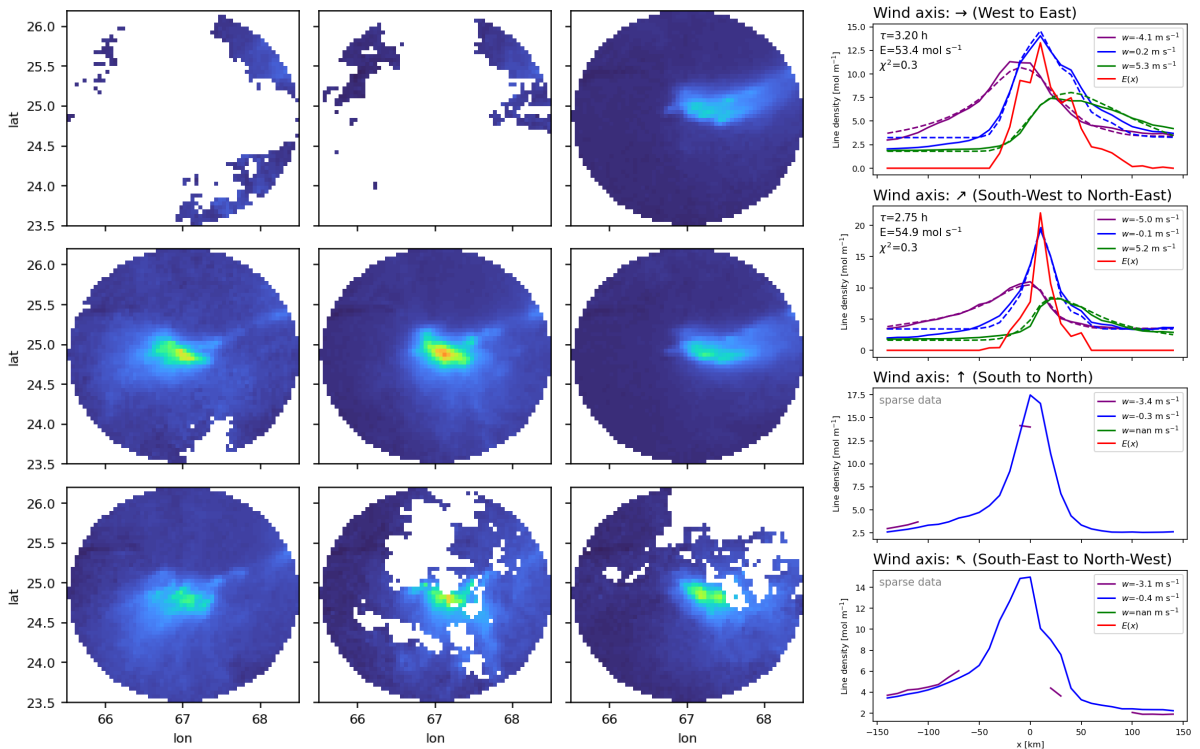

## 9 Rio de Janeiro

### 9.1 Winter

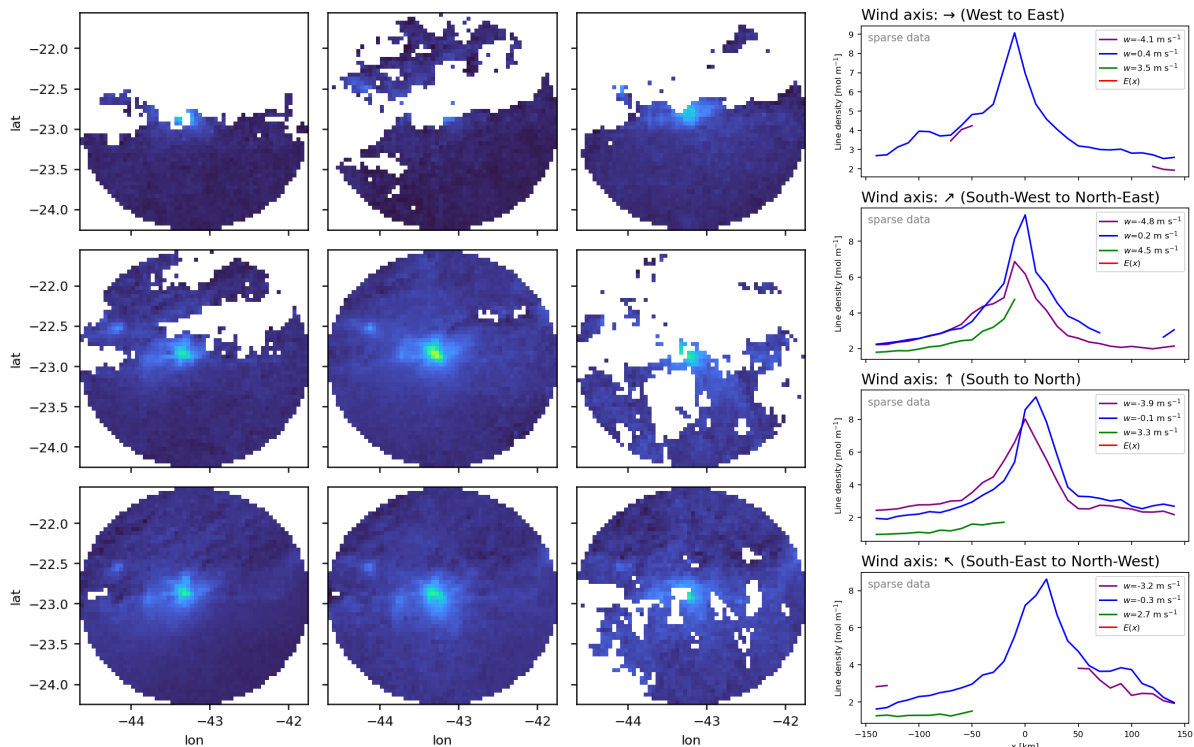

### 9.2 Spring

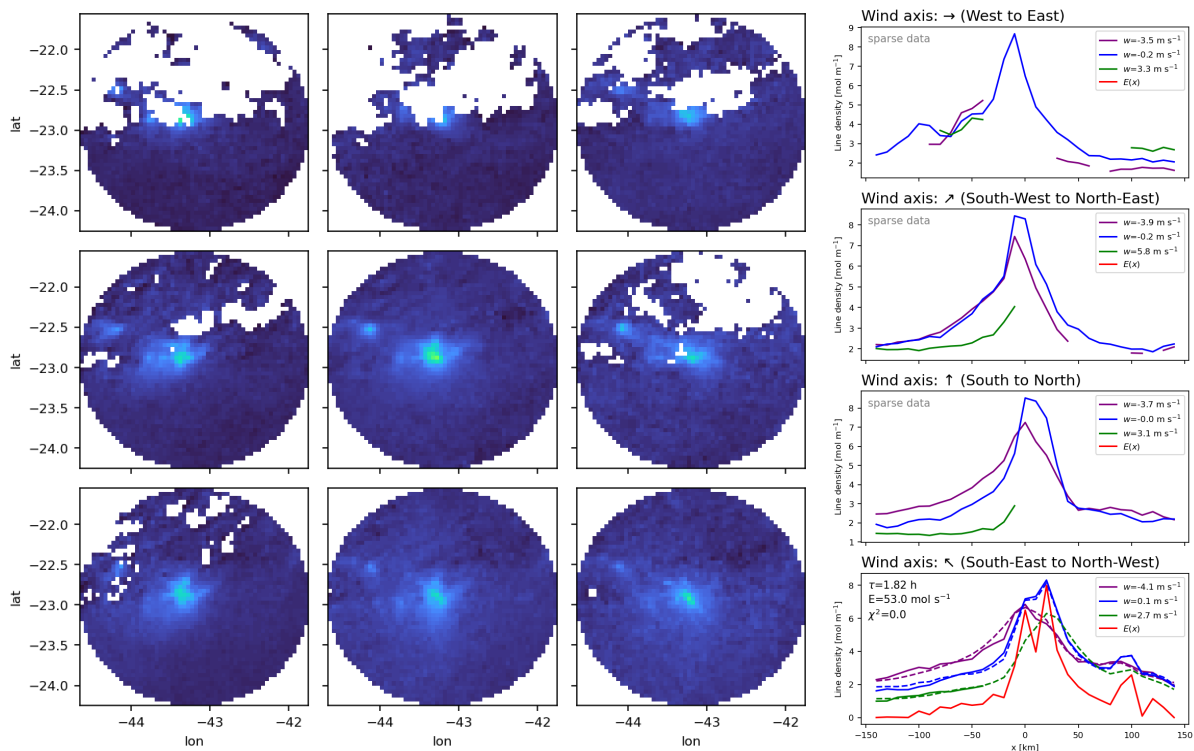

### 9.3 Summer

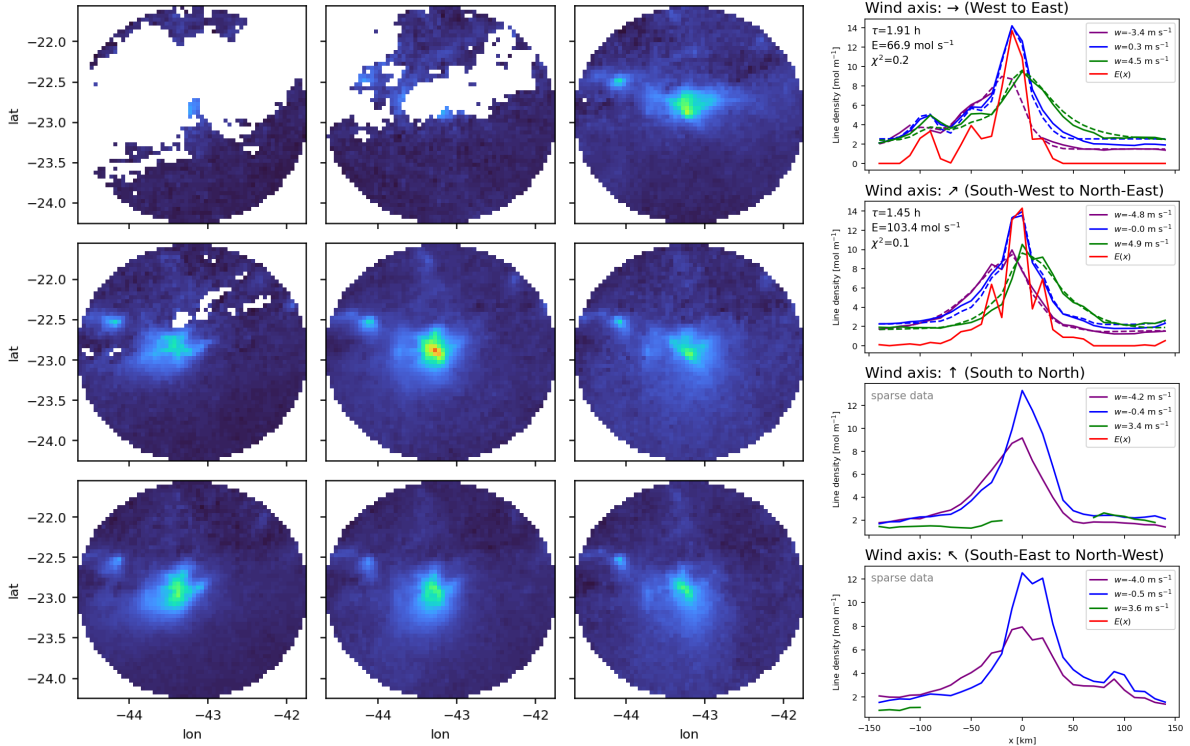

### 9.4 Autumn

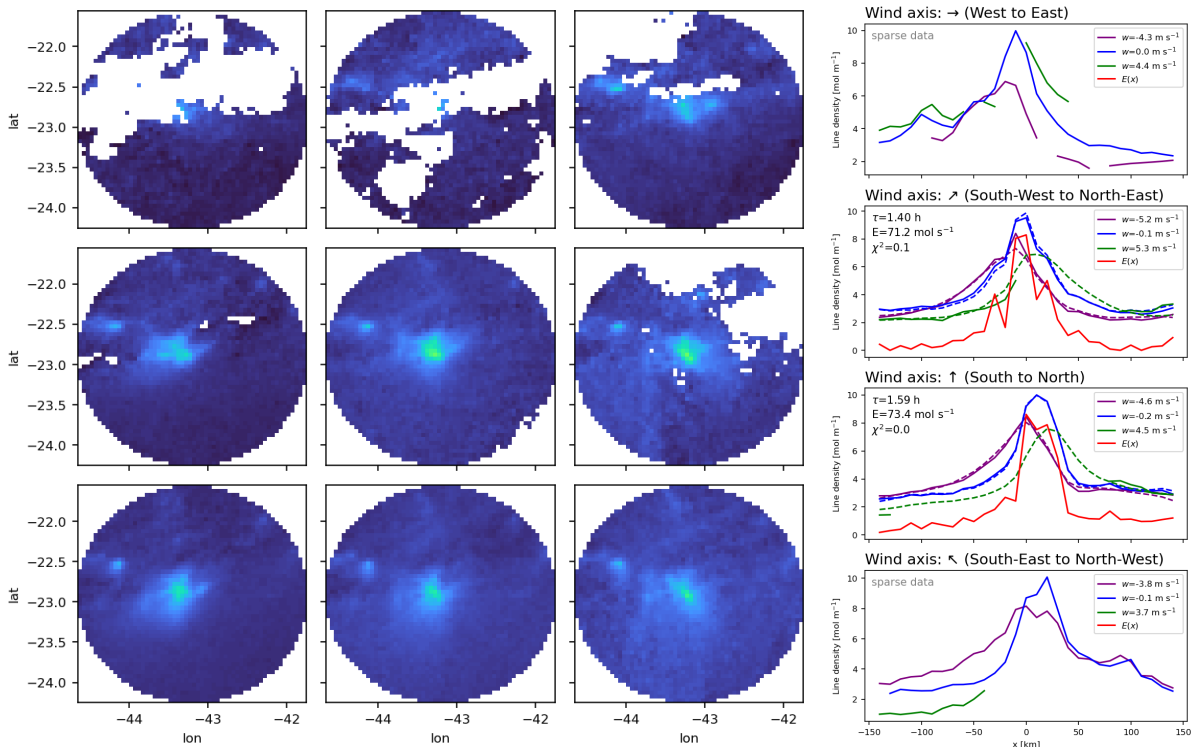

# 10 London

## 10.1 Winter

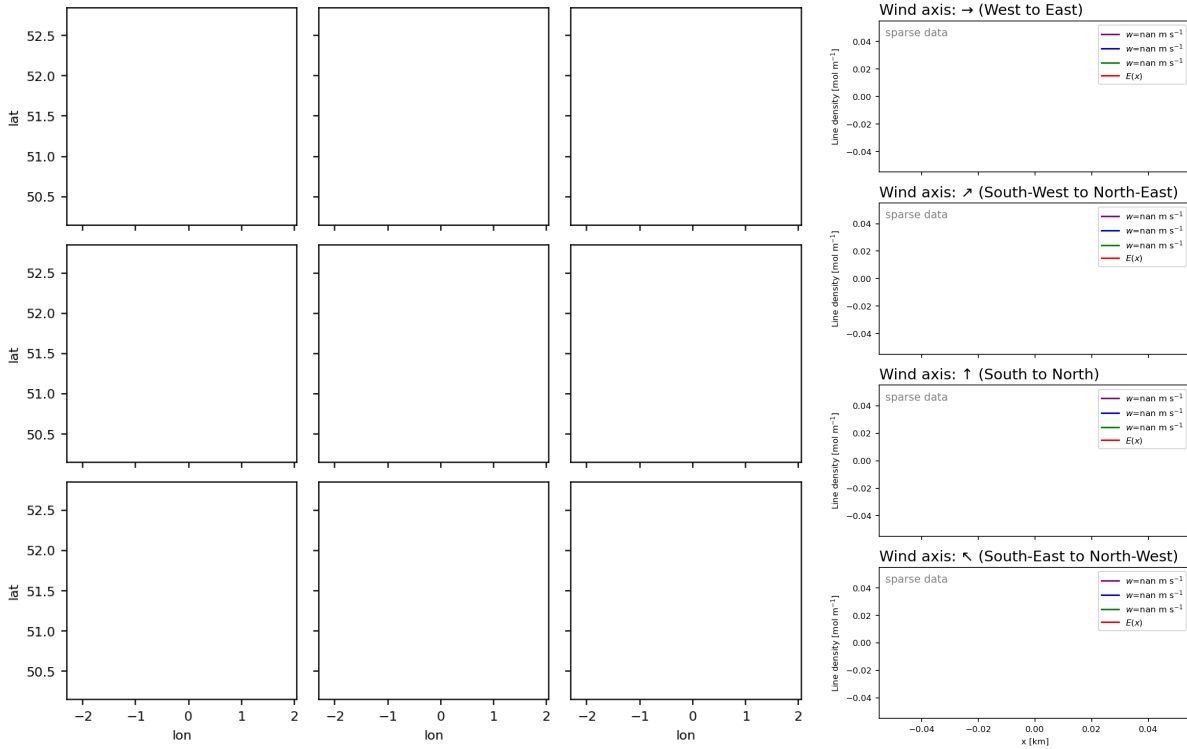

## 10.2 Spring

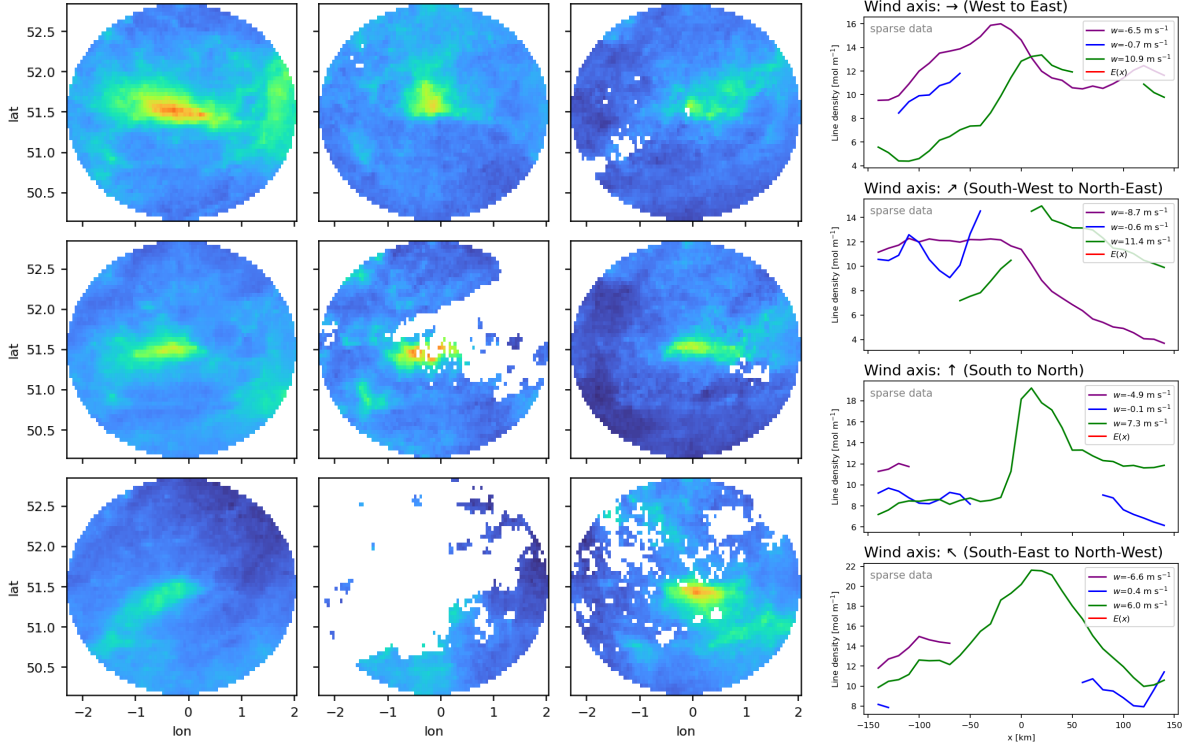

### 10.3 Summer

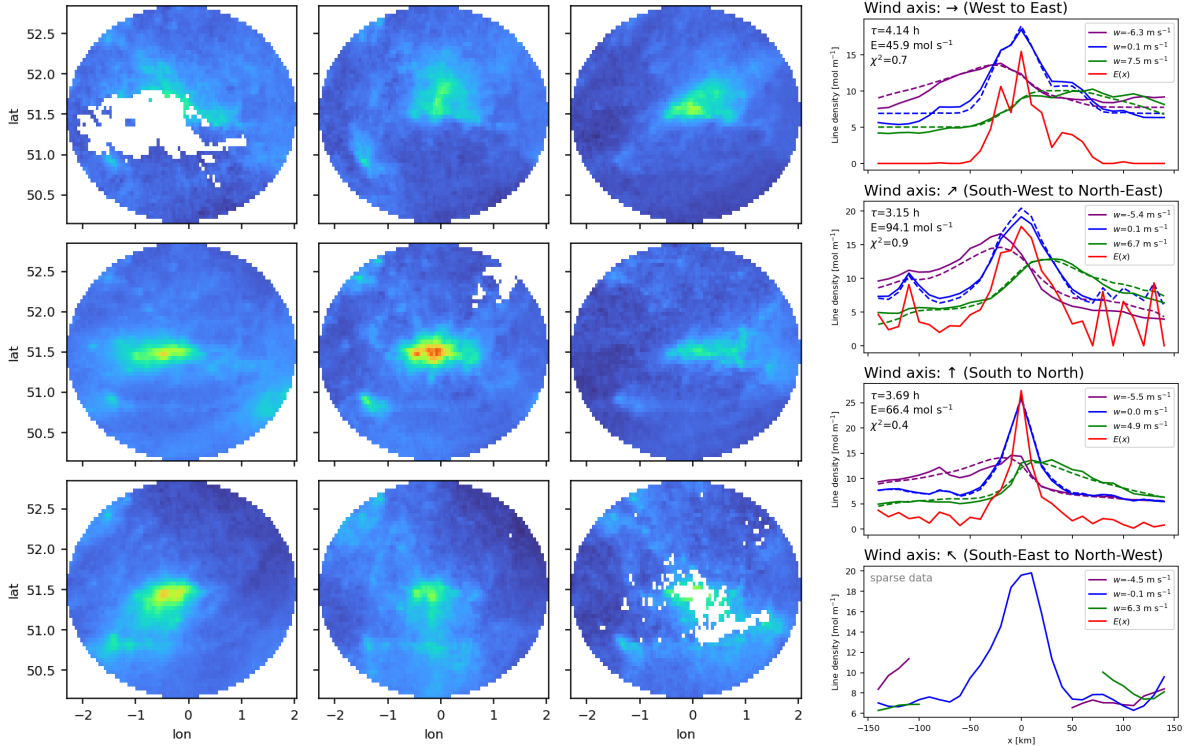

### 10.4 Autumn

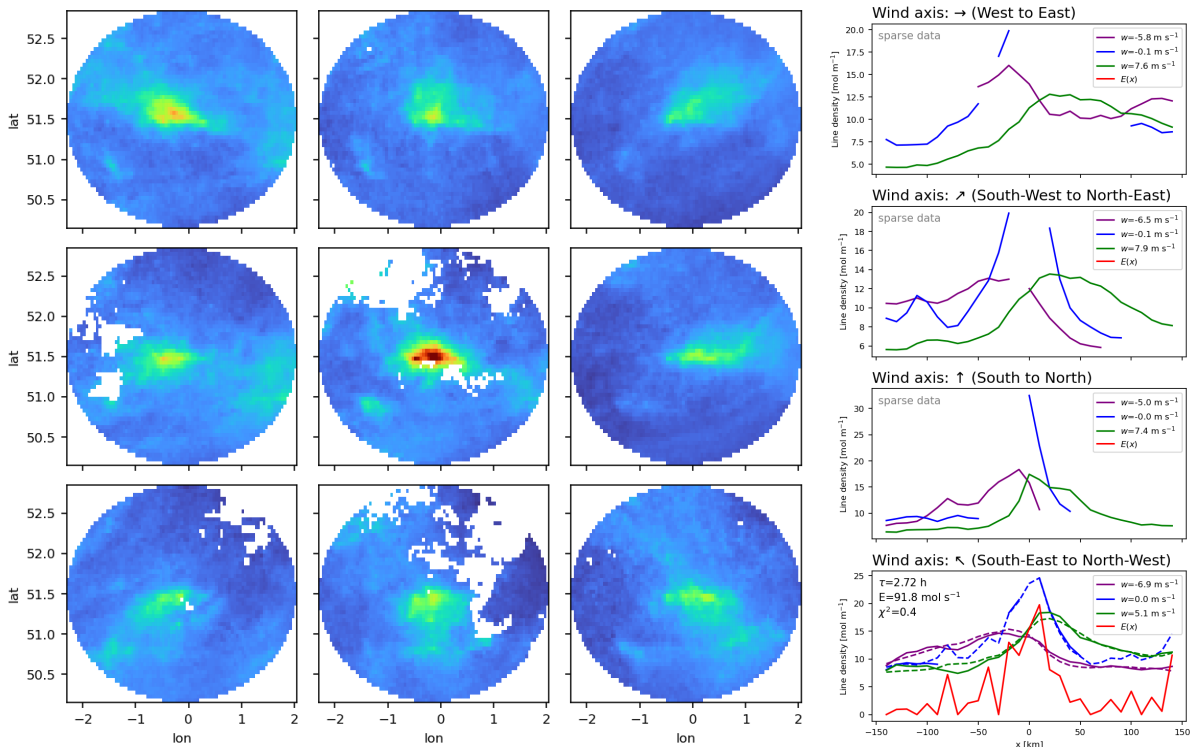

# 11 Paris

## 11.1 Winter

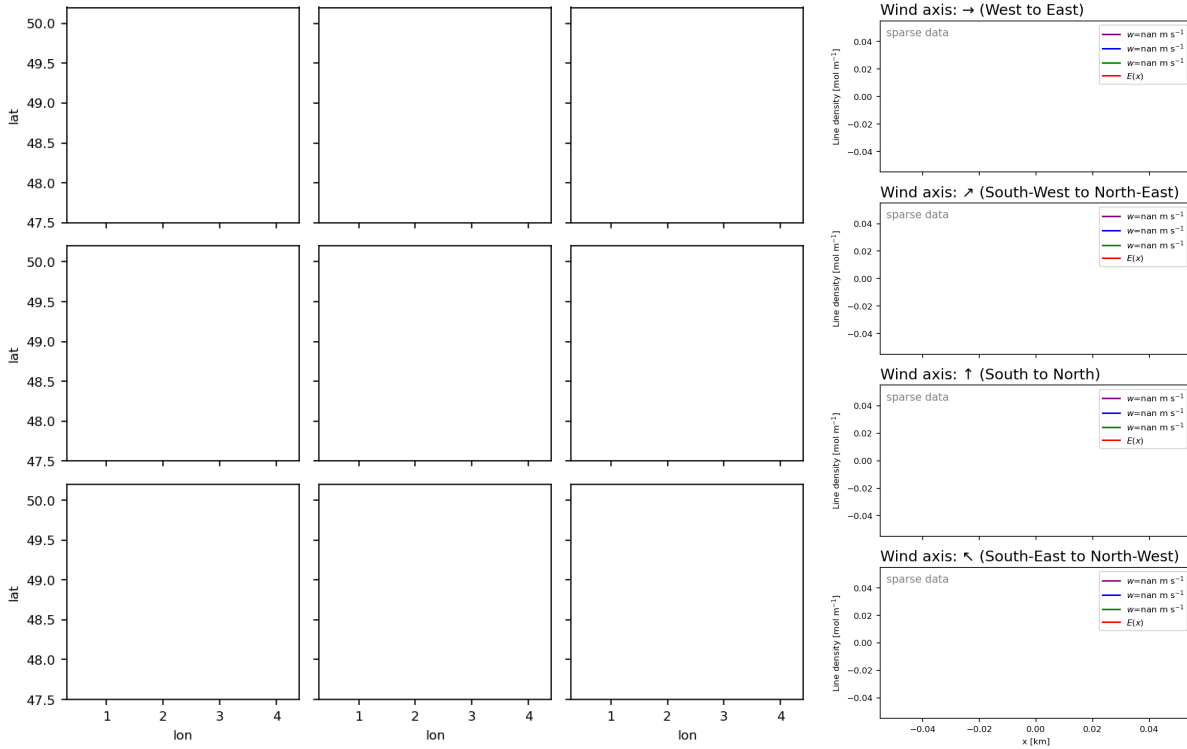

## 11.2 Spring

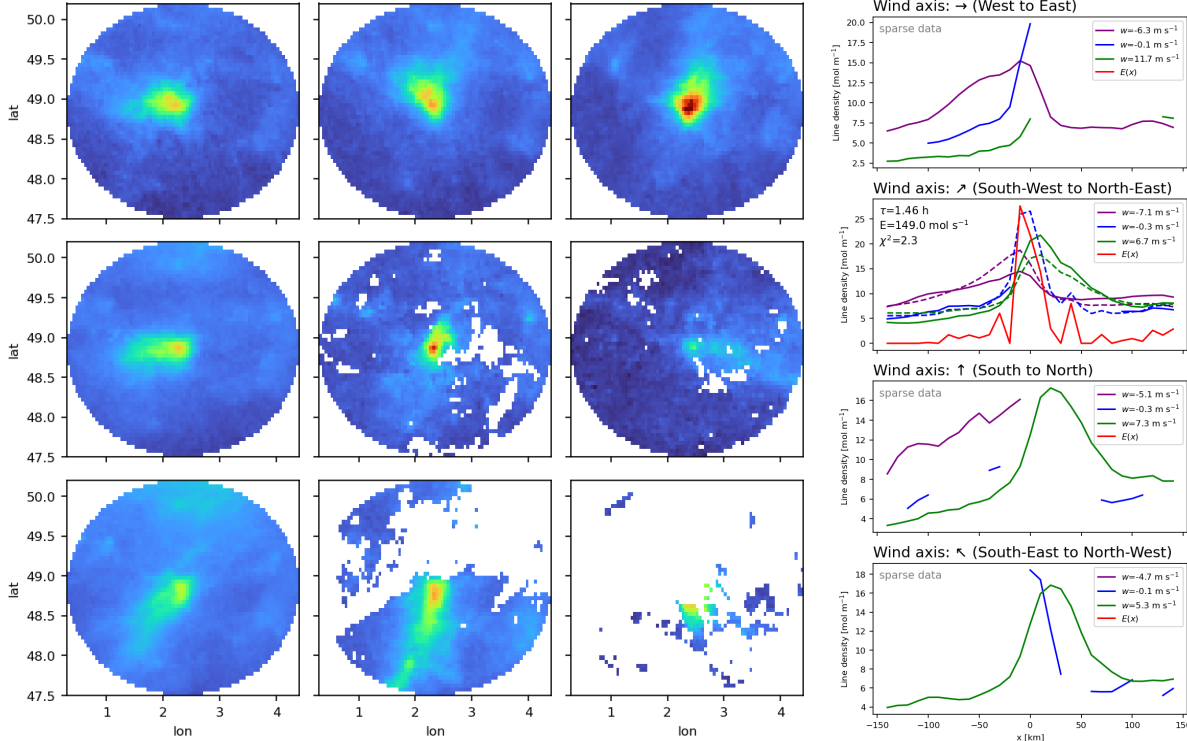

### 11.3 Summer

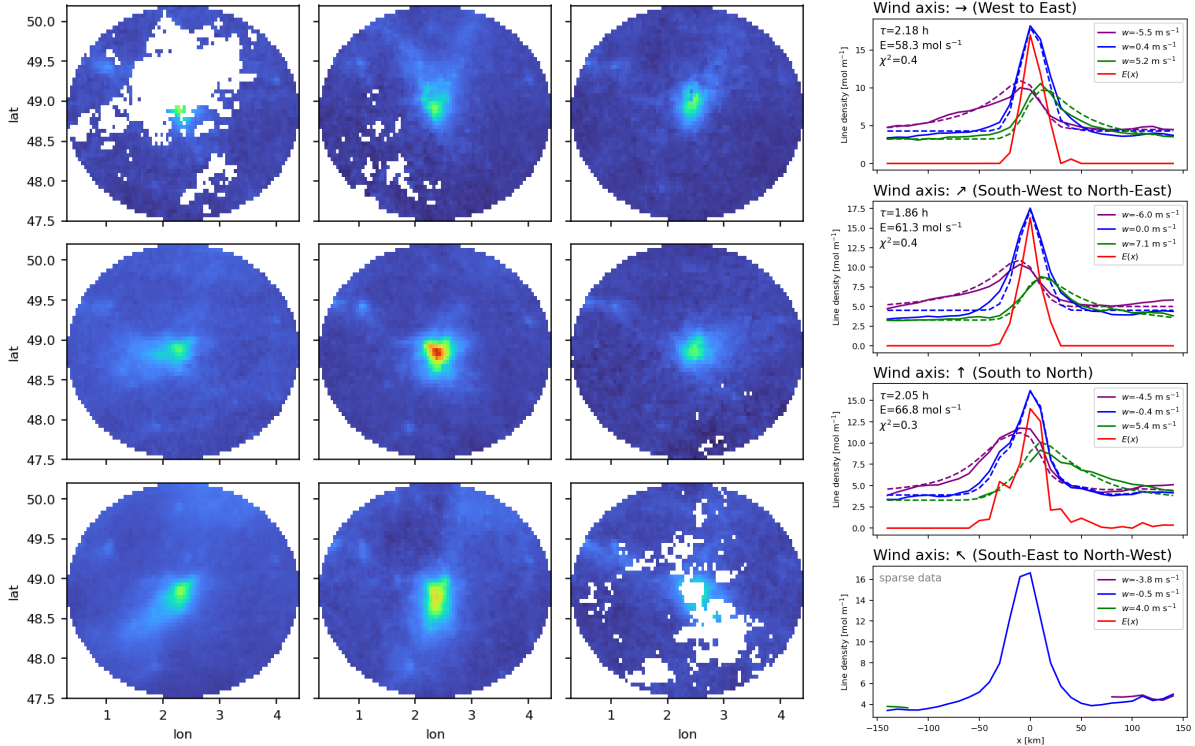

### 11.4 Autumn

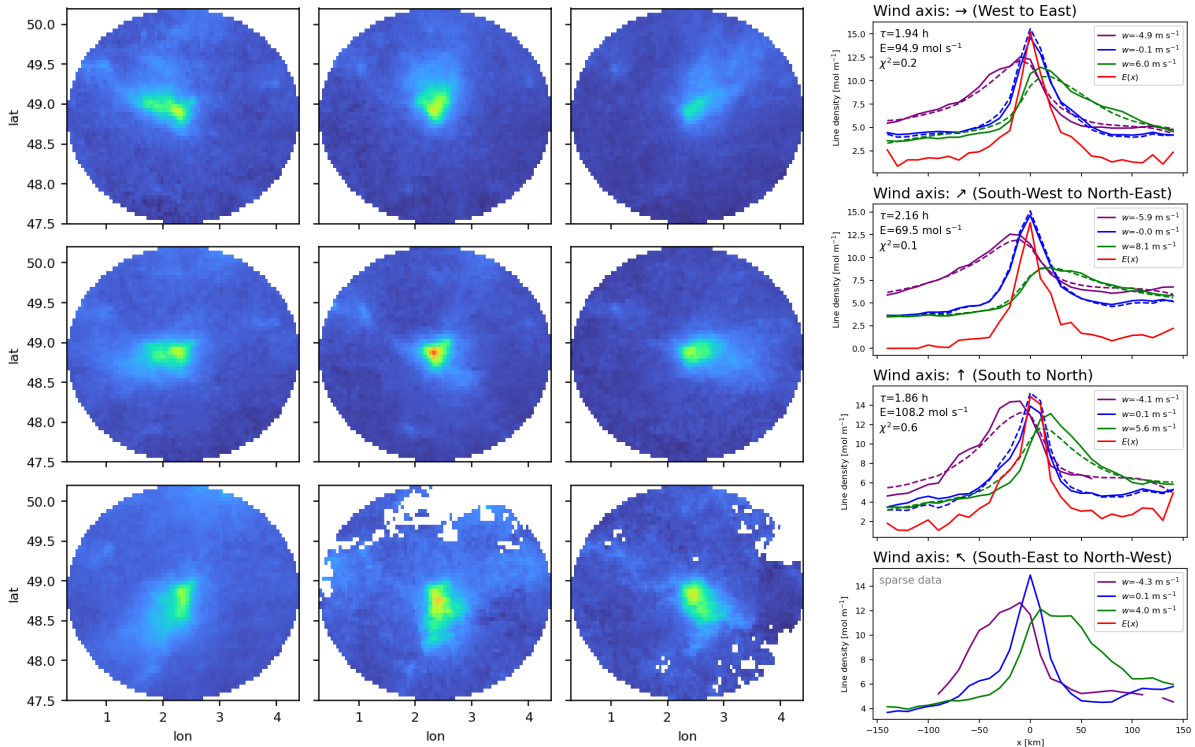



## 12 Zhengzhou

### 12.1 Winter

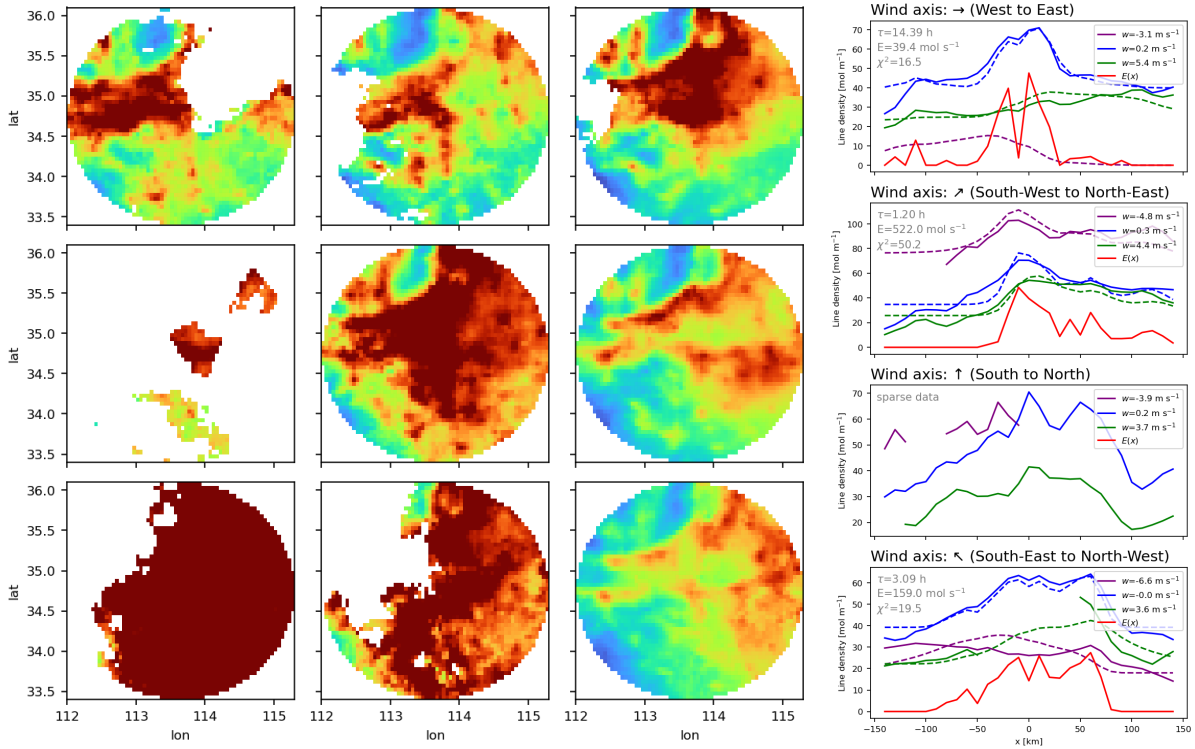

### 12.2 Spring

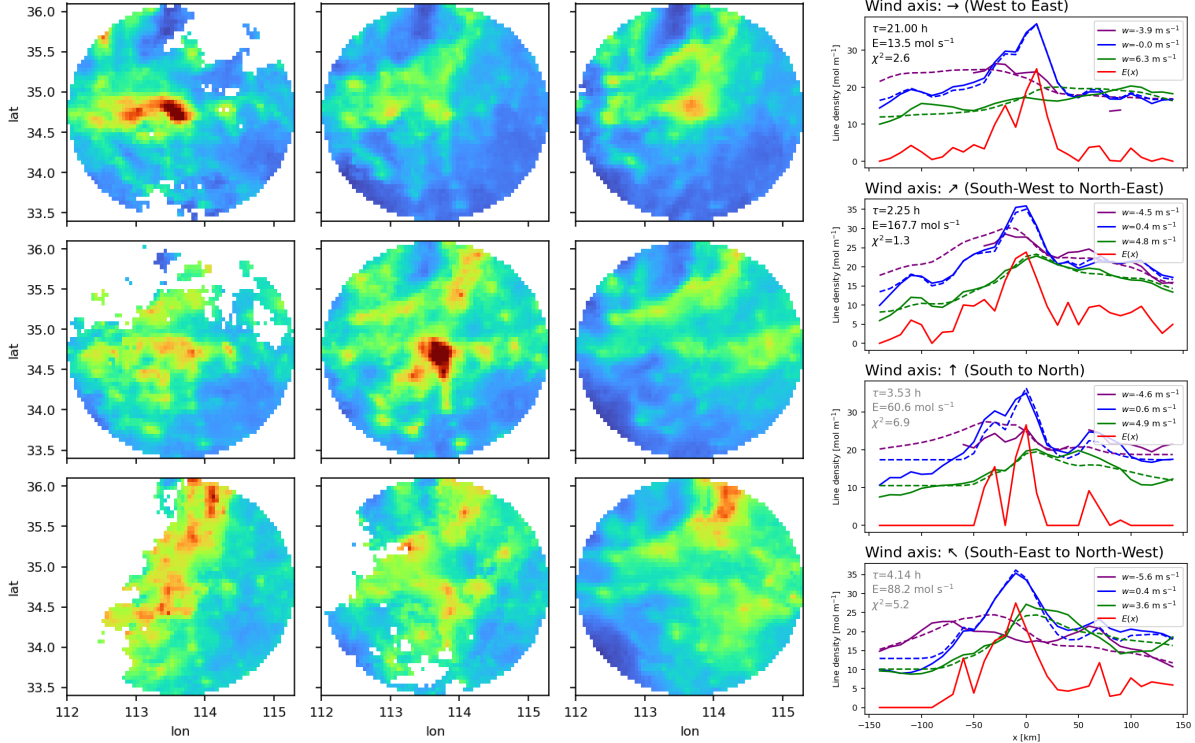

## 12.3 Summer

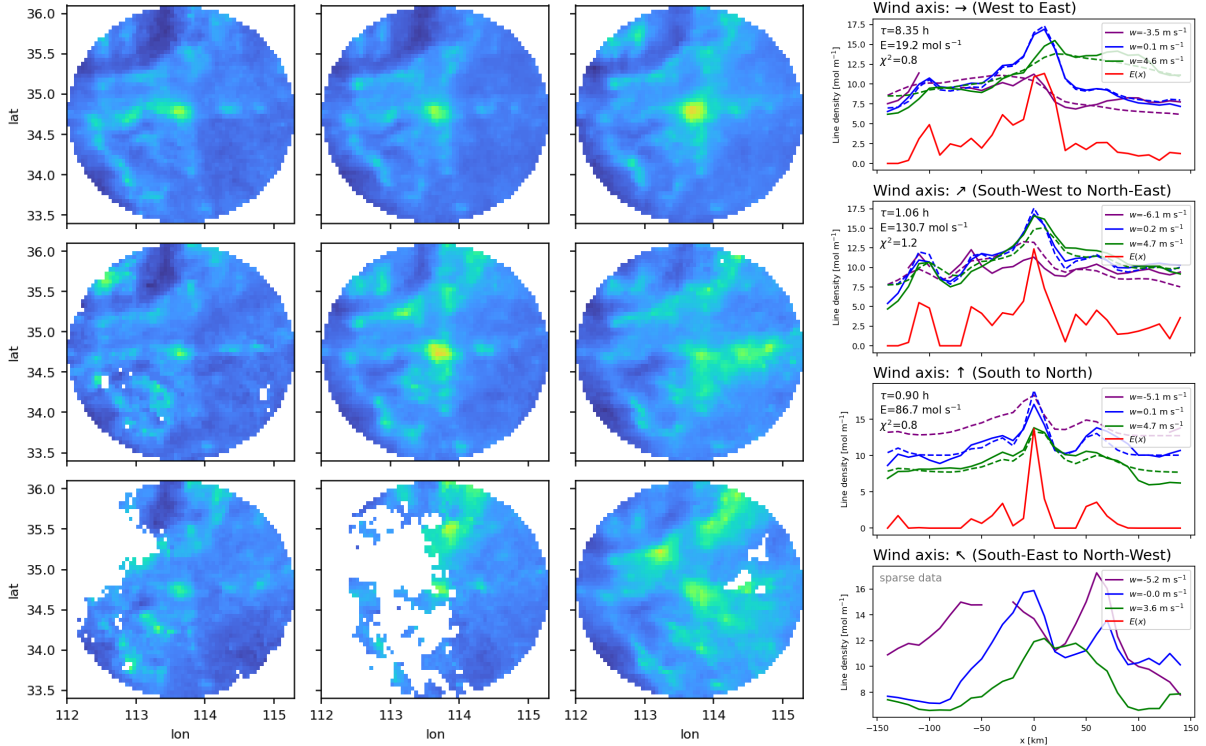

## 12.4 Autumn

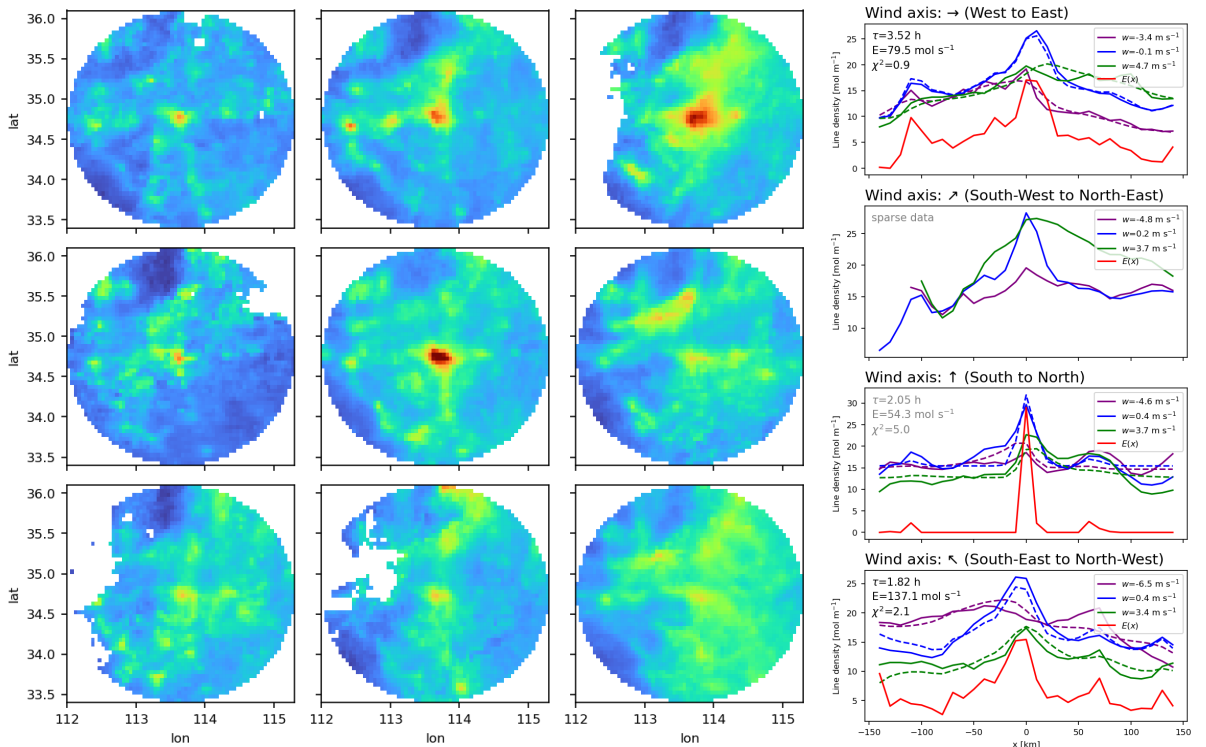

# 13 Wuhan

## 13.1 Winter

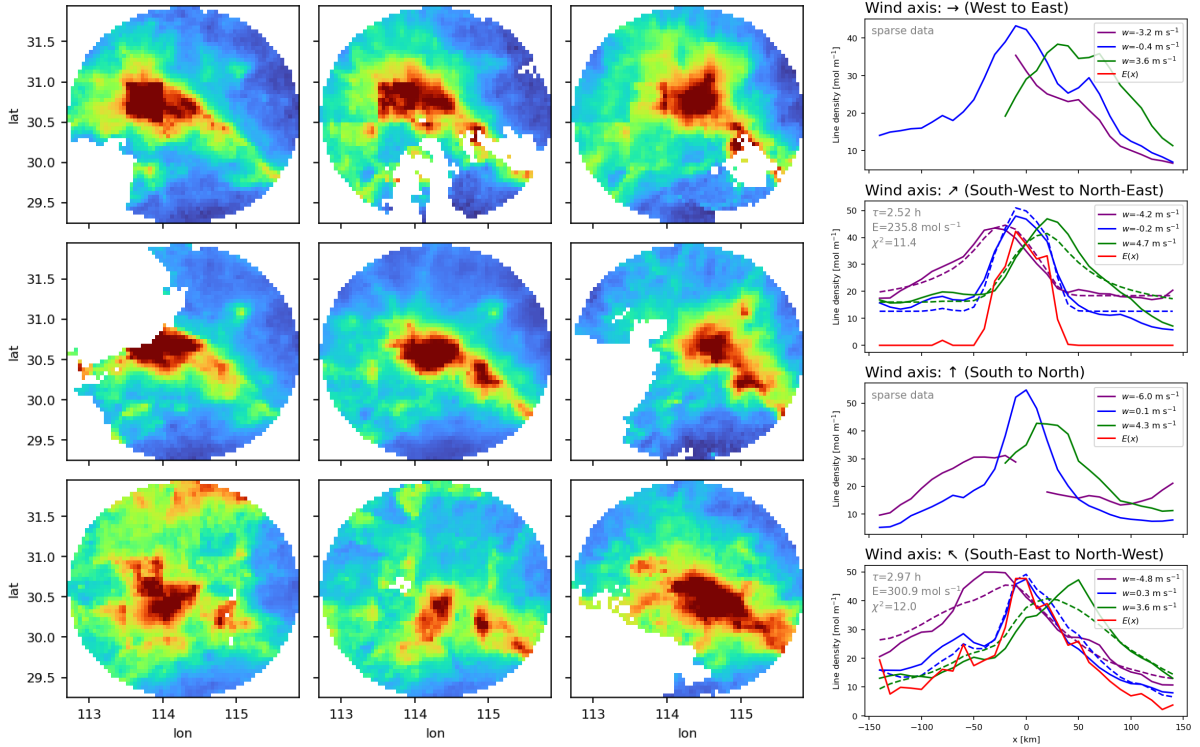

## 13.2 Spring

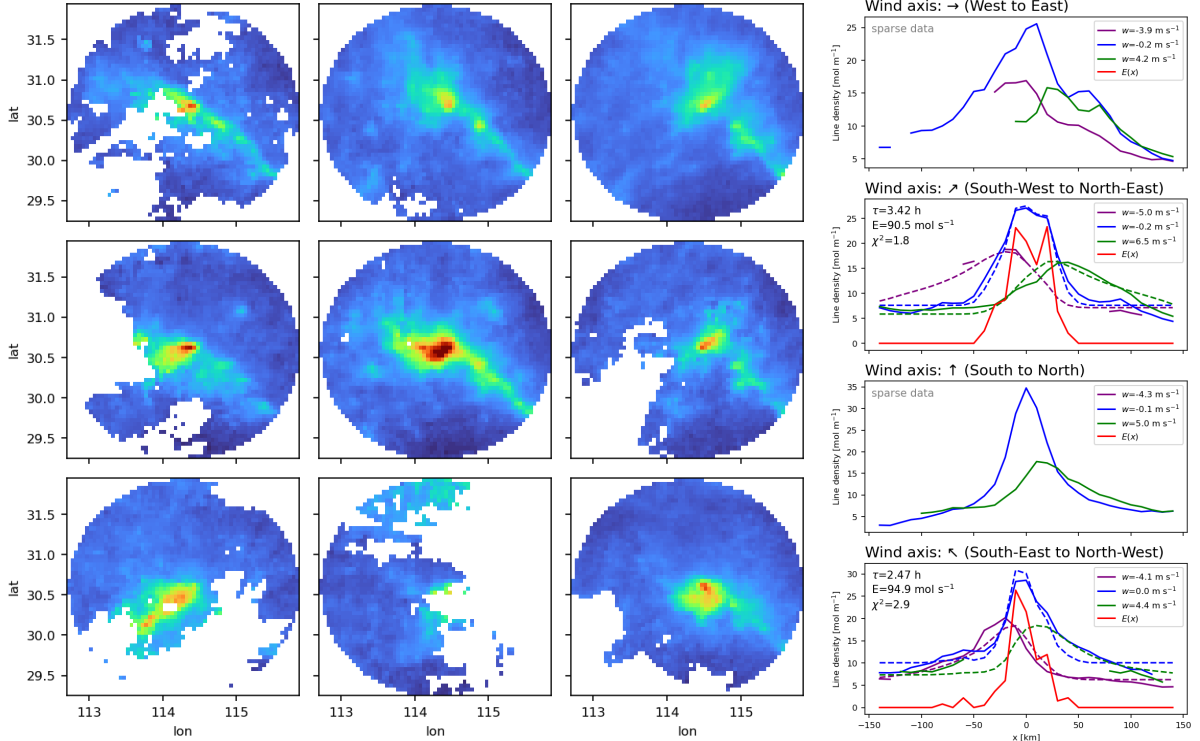

### 13.3 Summer

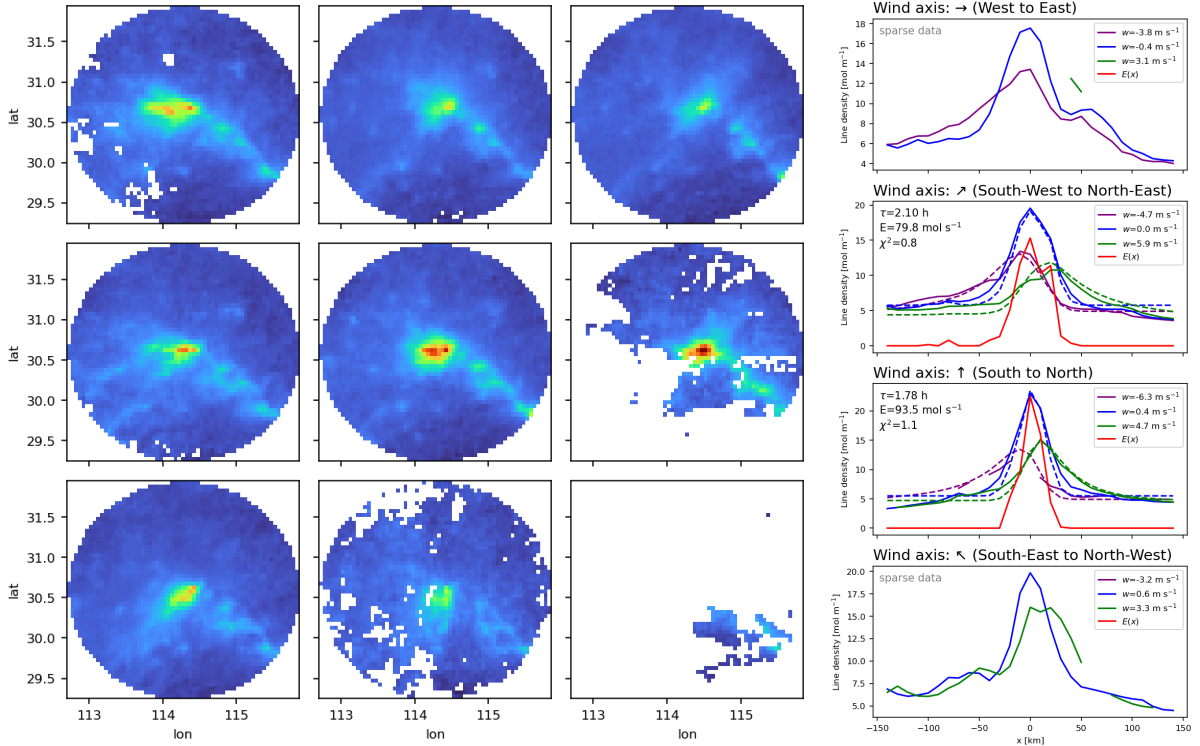

### 13.4 Autumn

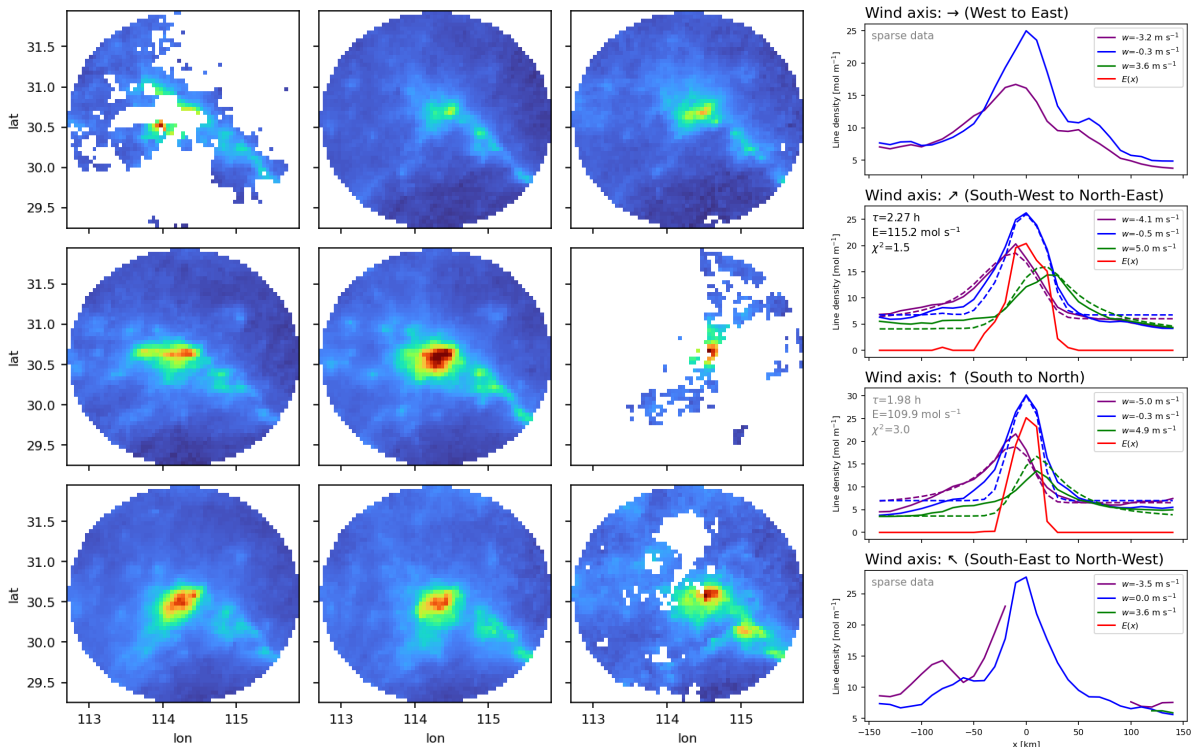

# 14 Chicago

## 14.1 Winter

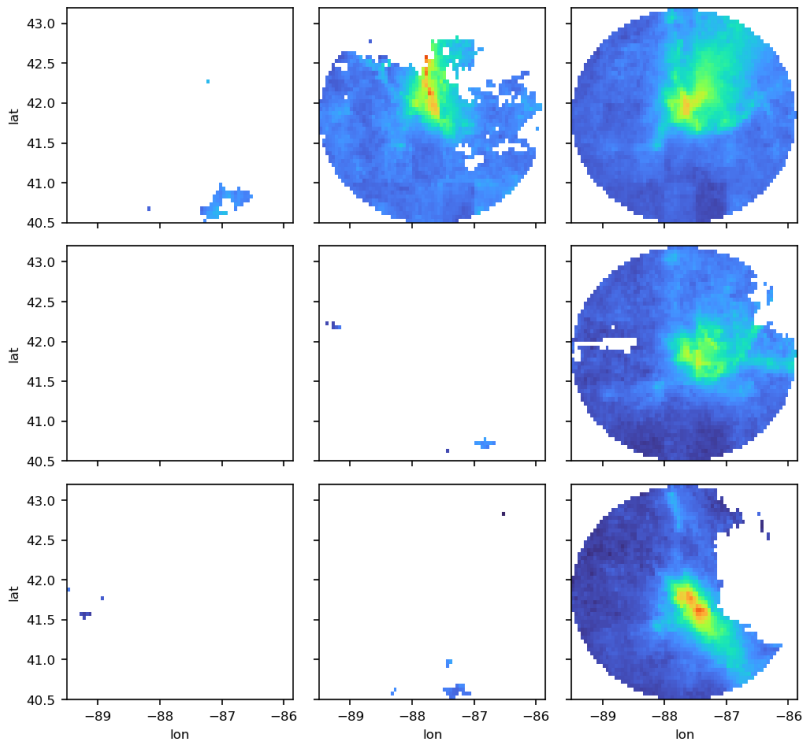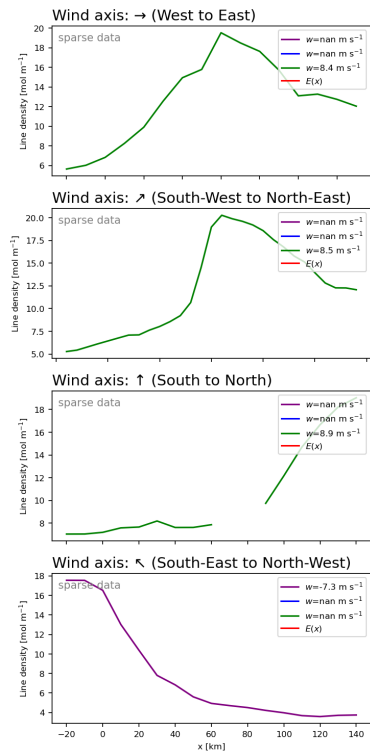

## 14.2 Spring

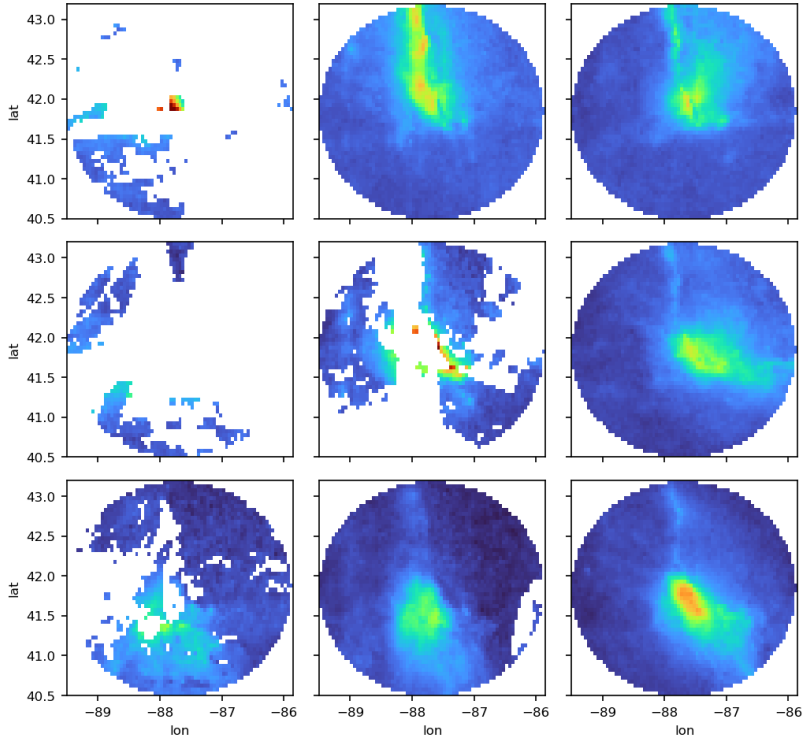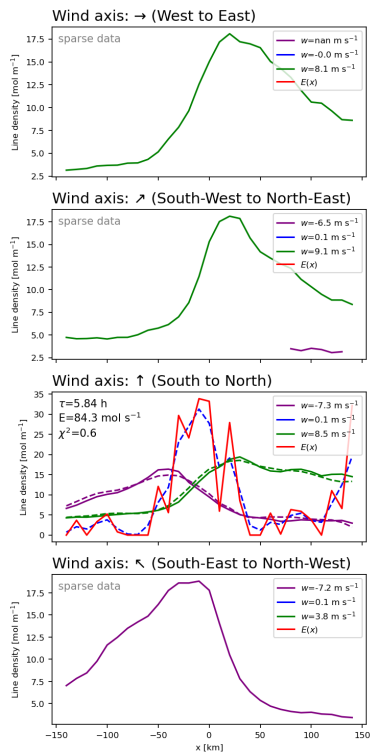

### 14.3 Summer

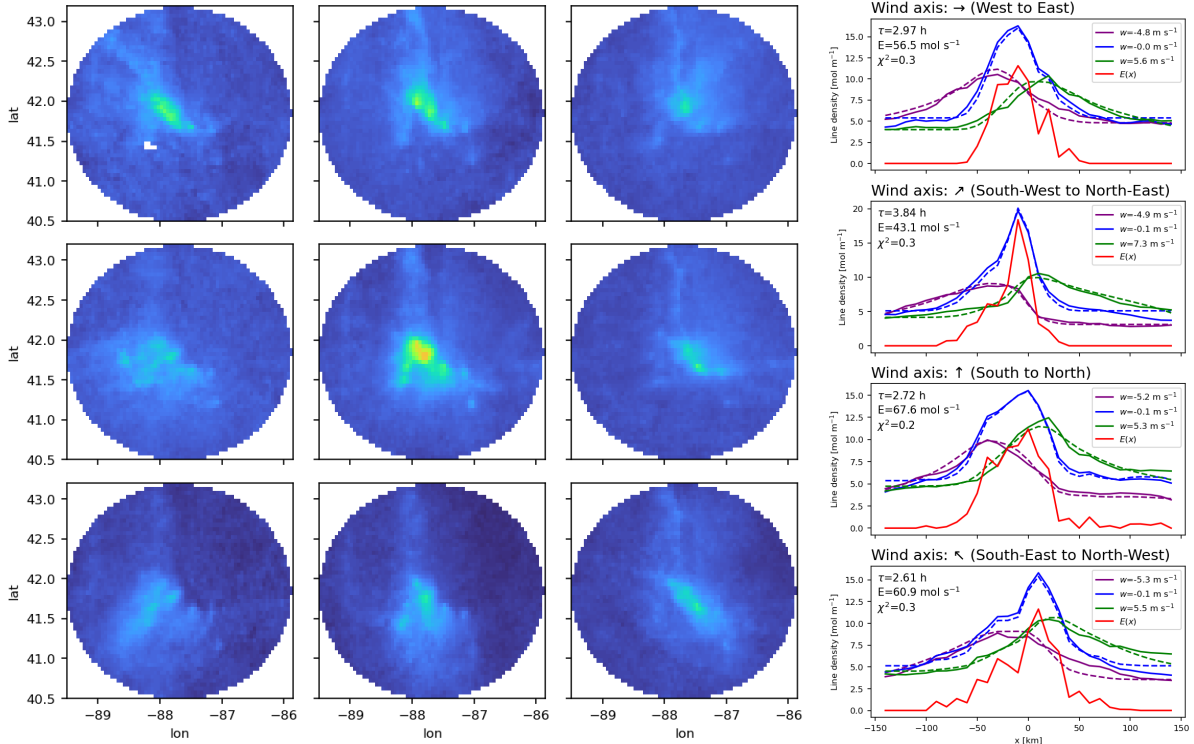

### 14.4 Autumn

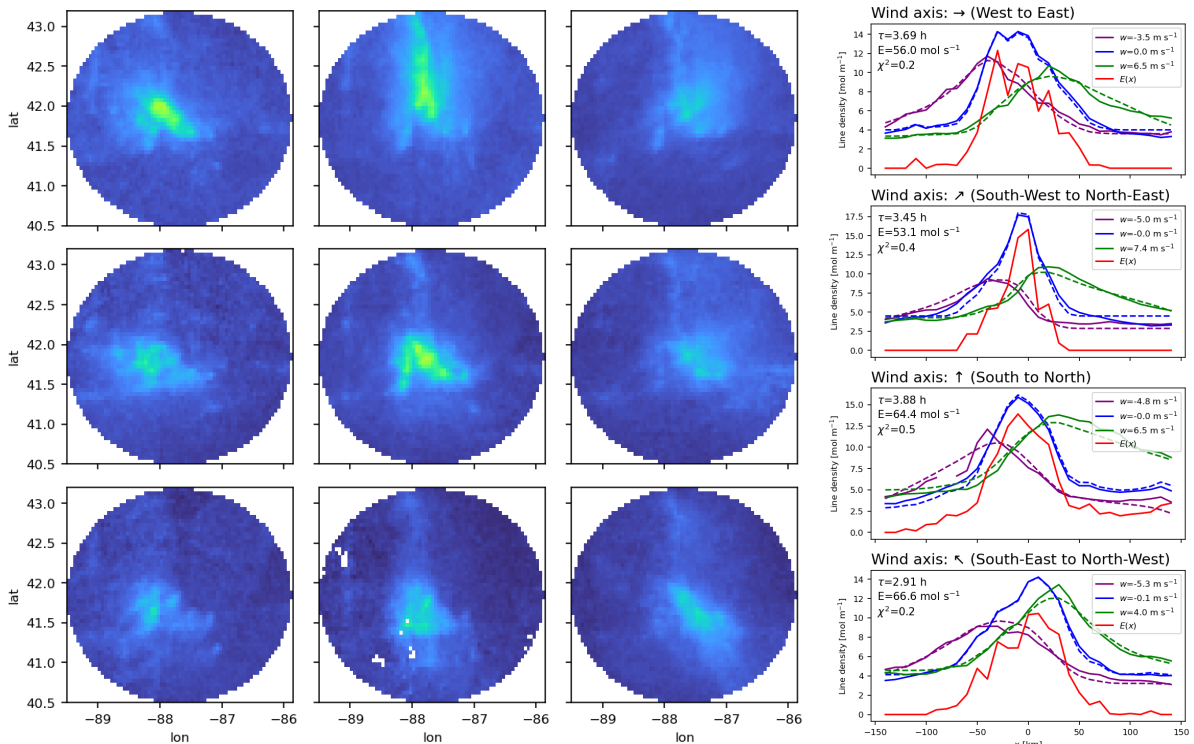

# 15 Changsha

## 15.1 Winter

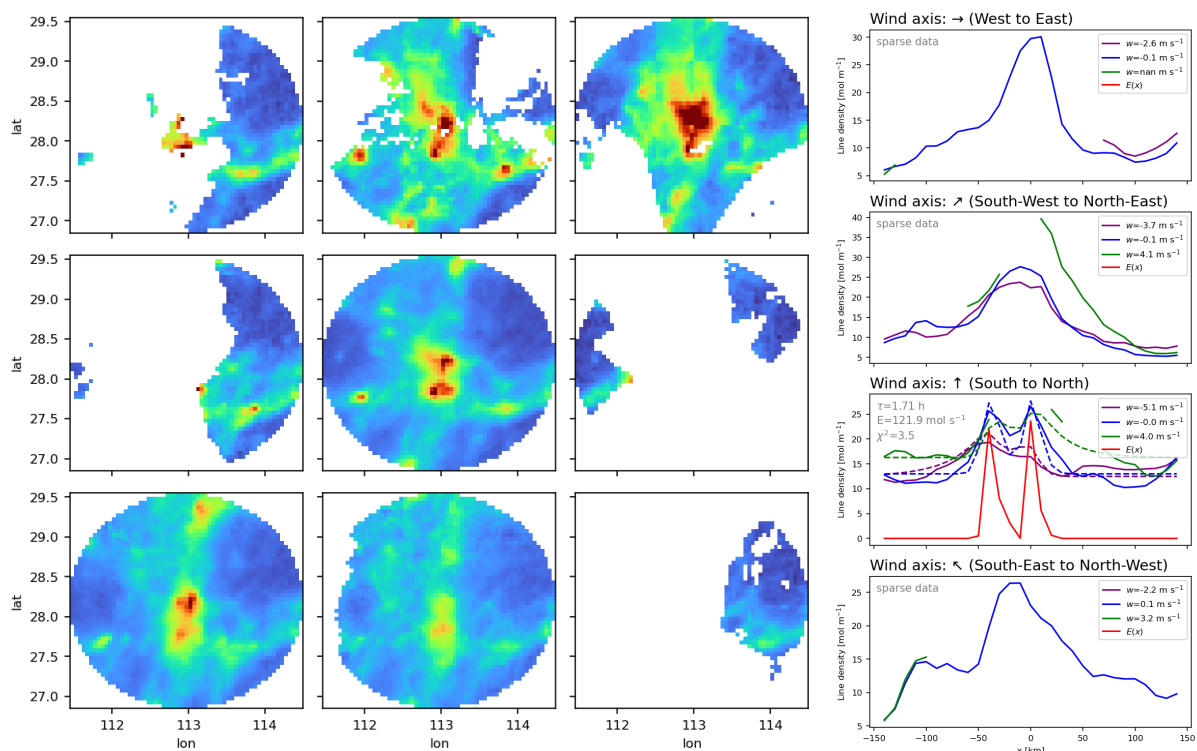

## 15.2 Spring

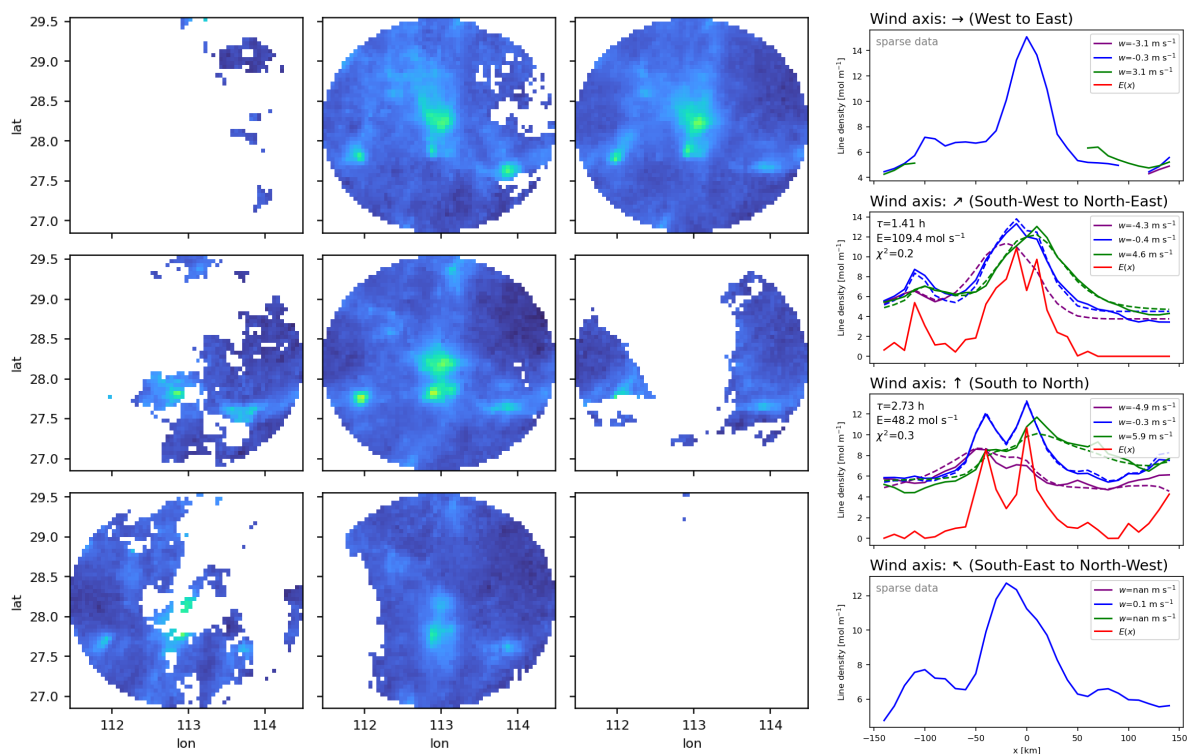

### 15.3 Summer

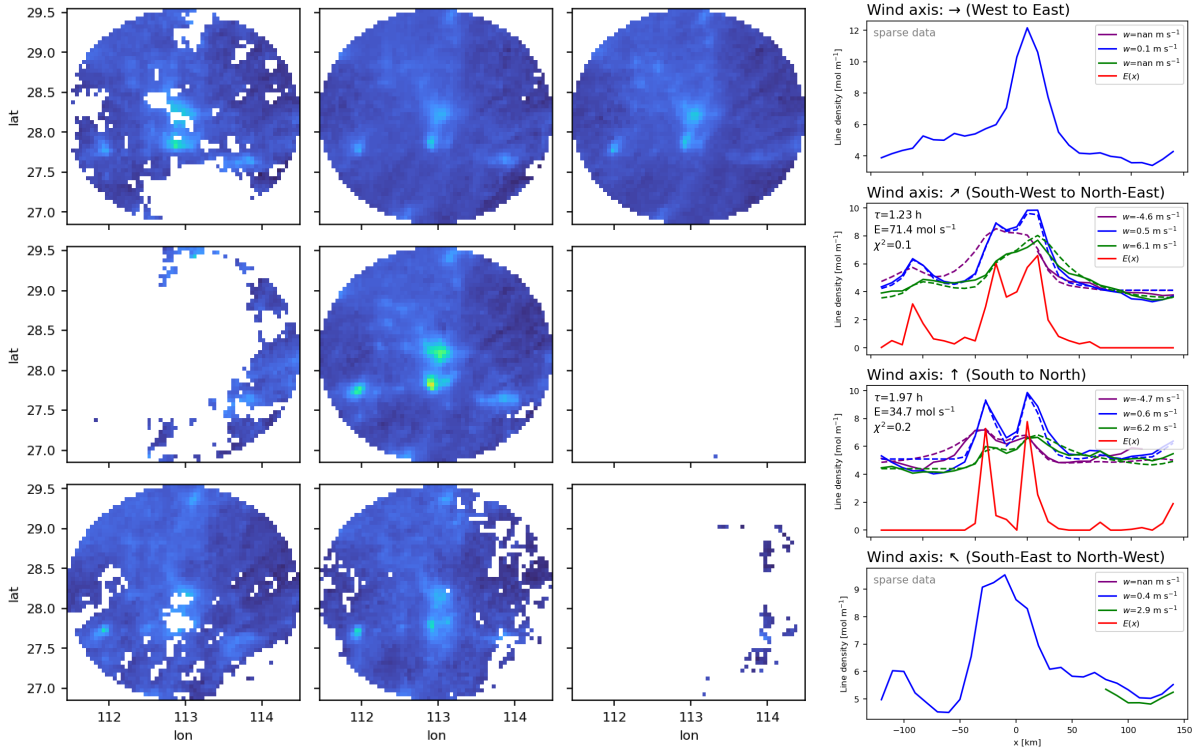

### 15.4 Autumn

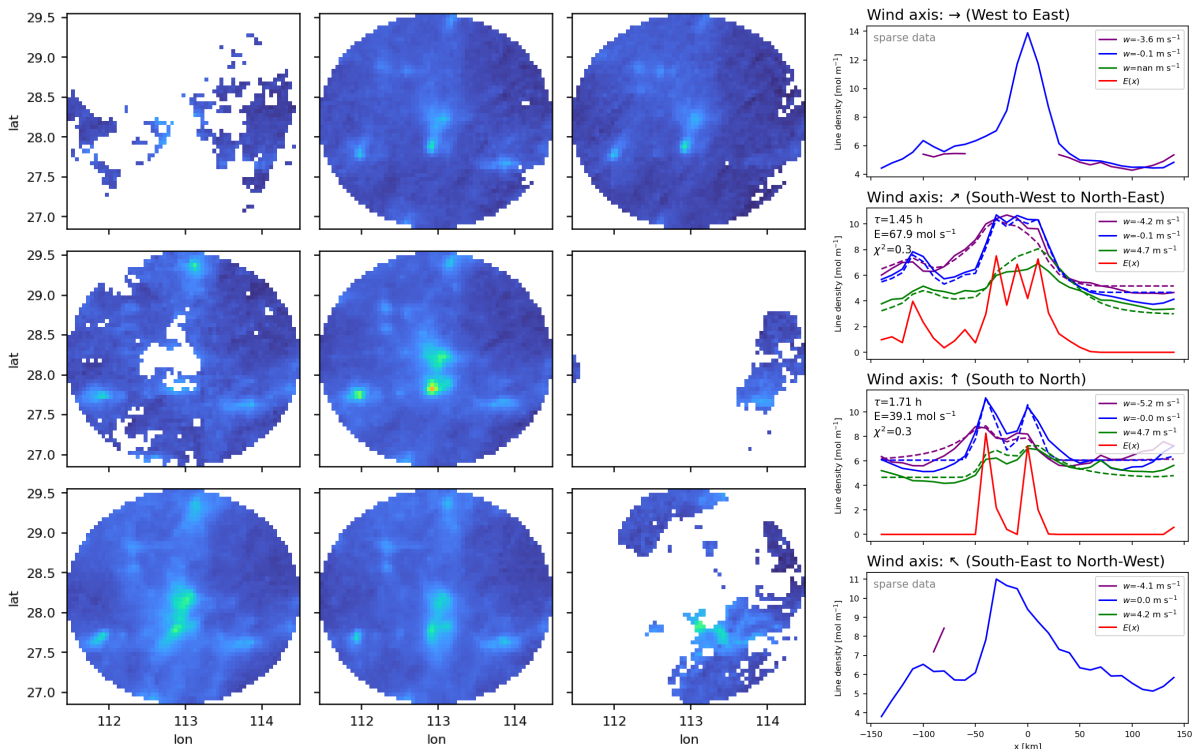



## 16 Nanning

### 16.1 Winter

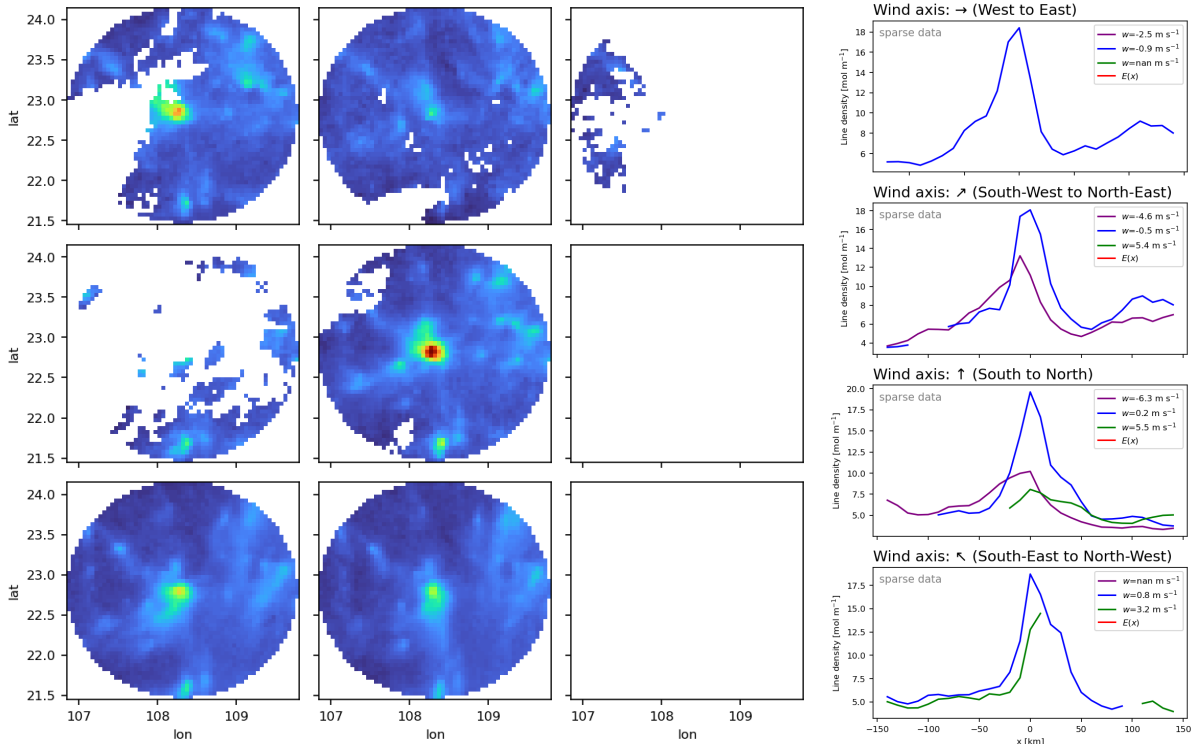

### 16.2 Spring

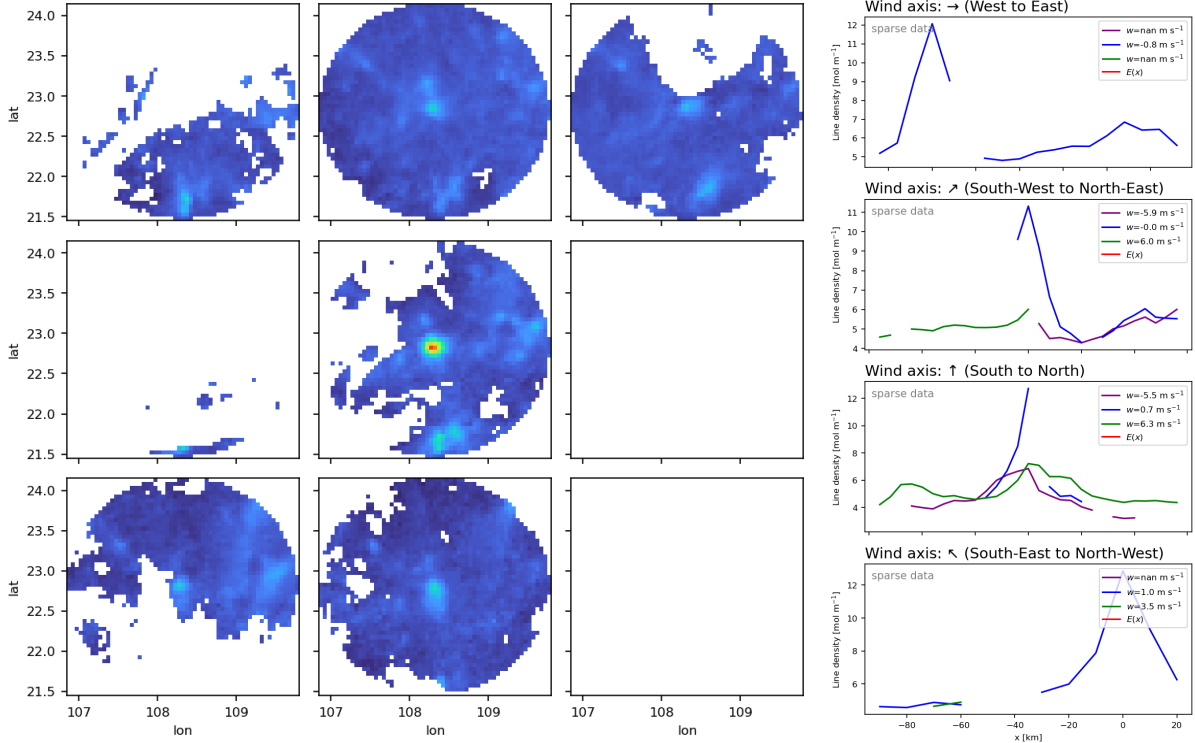

## 16.3 Summer

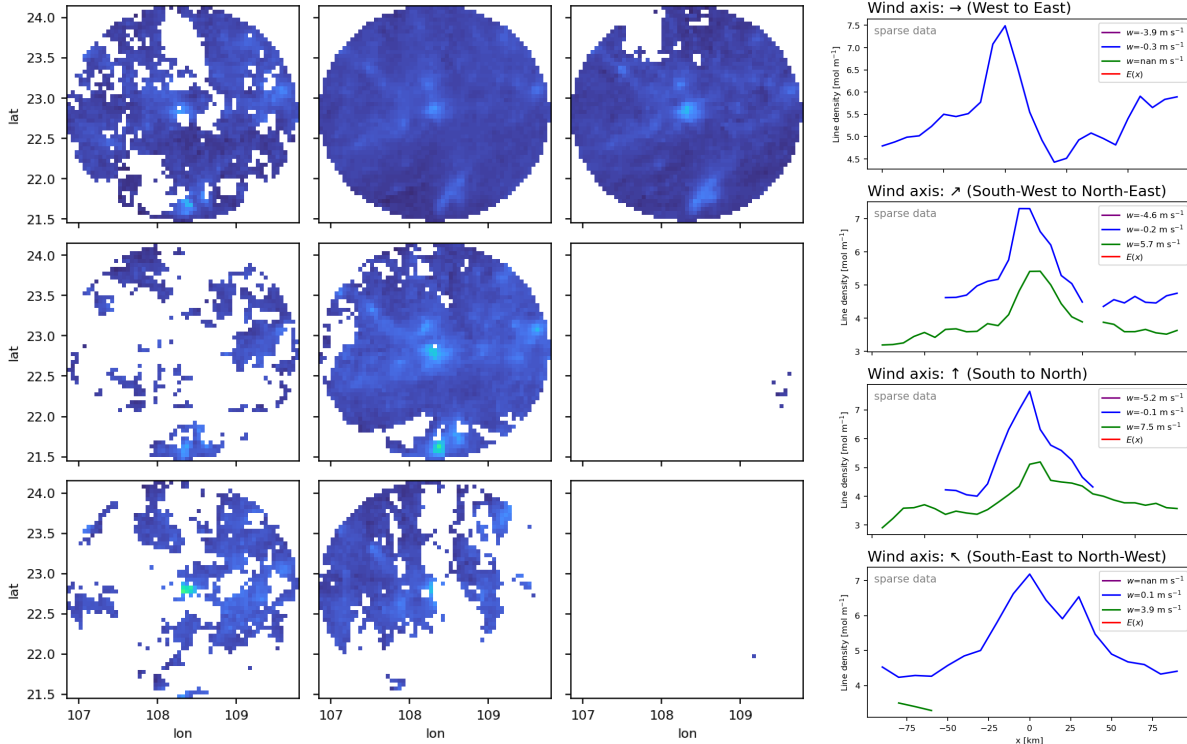

## 16.4 Autumn

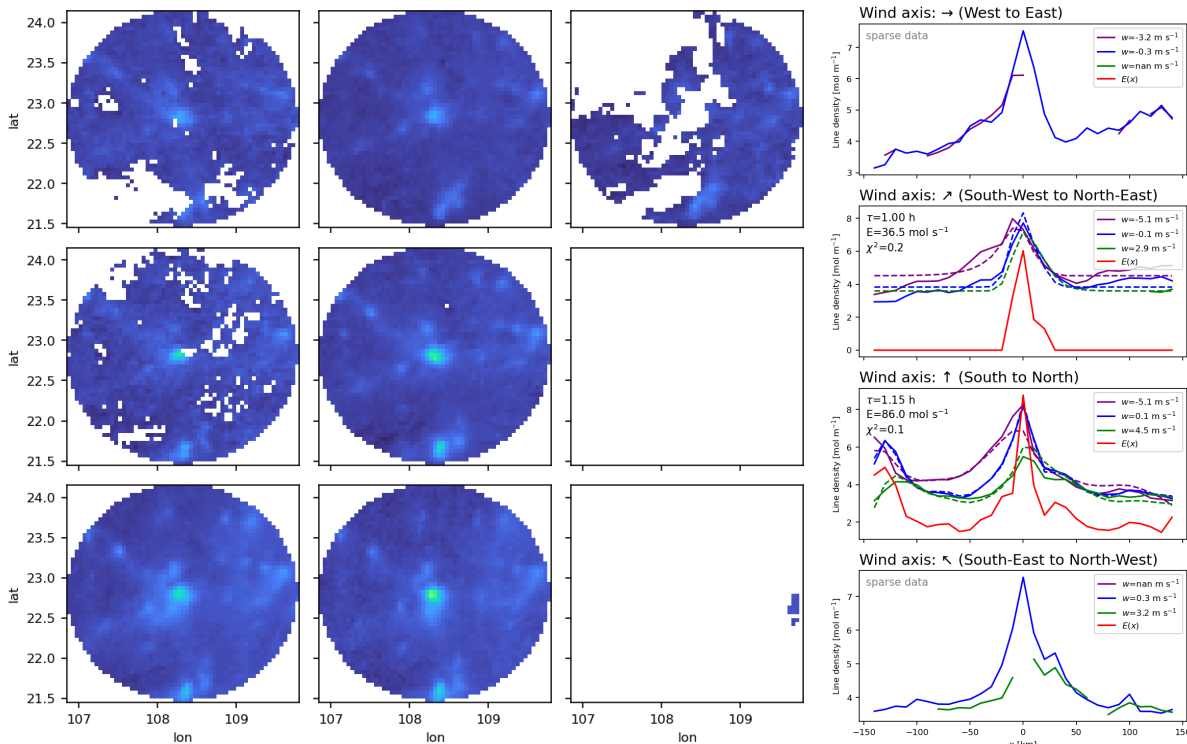

# 17 Shenyang

## 17.1 Winter

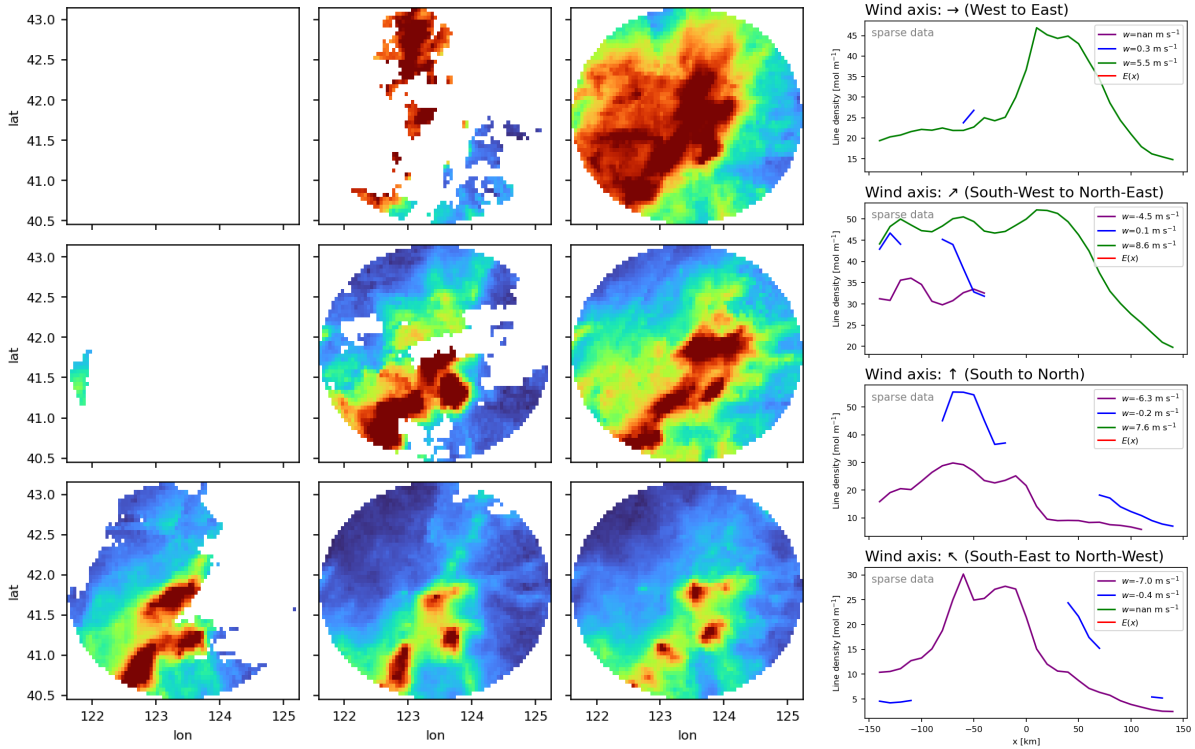

## 17.2 Spring

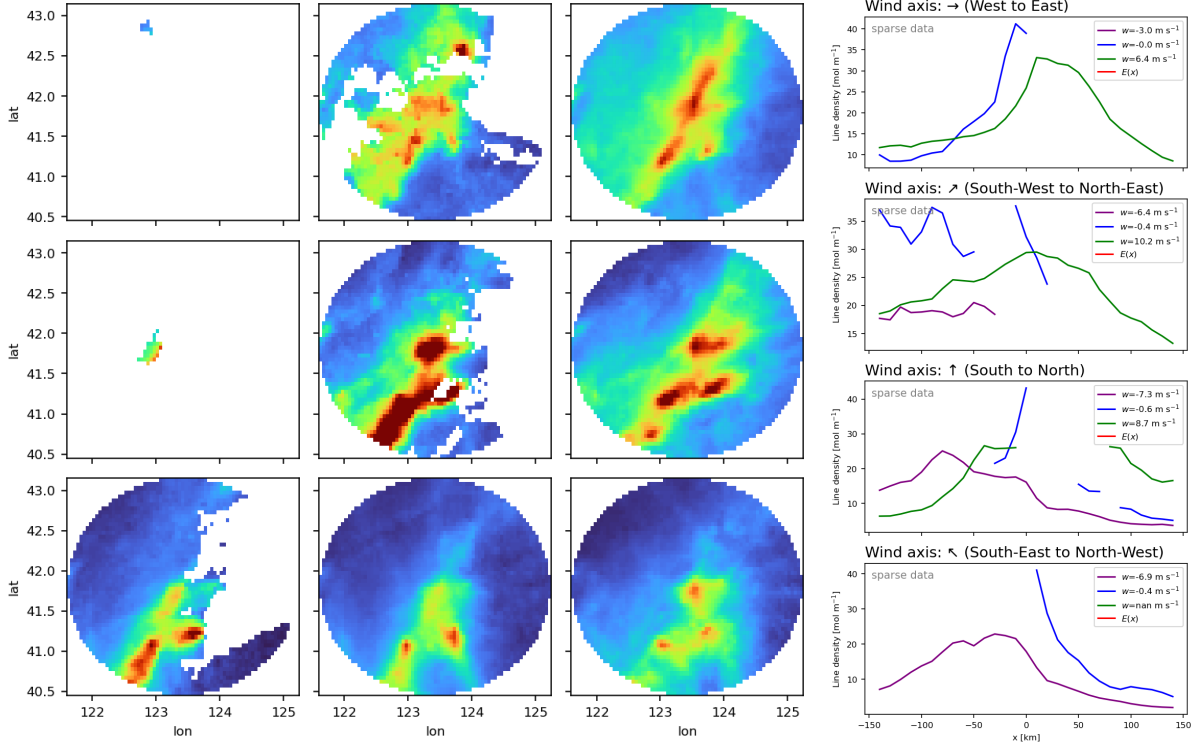

## 17.3 Summer

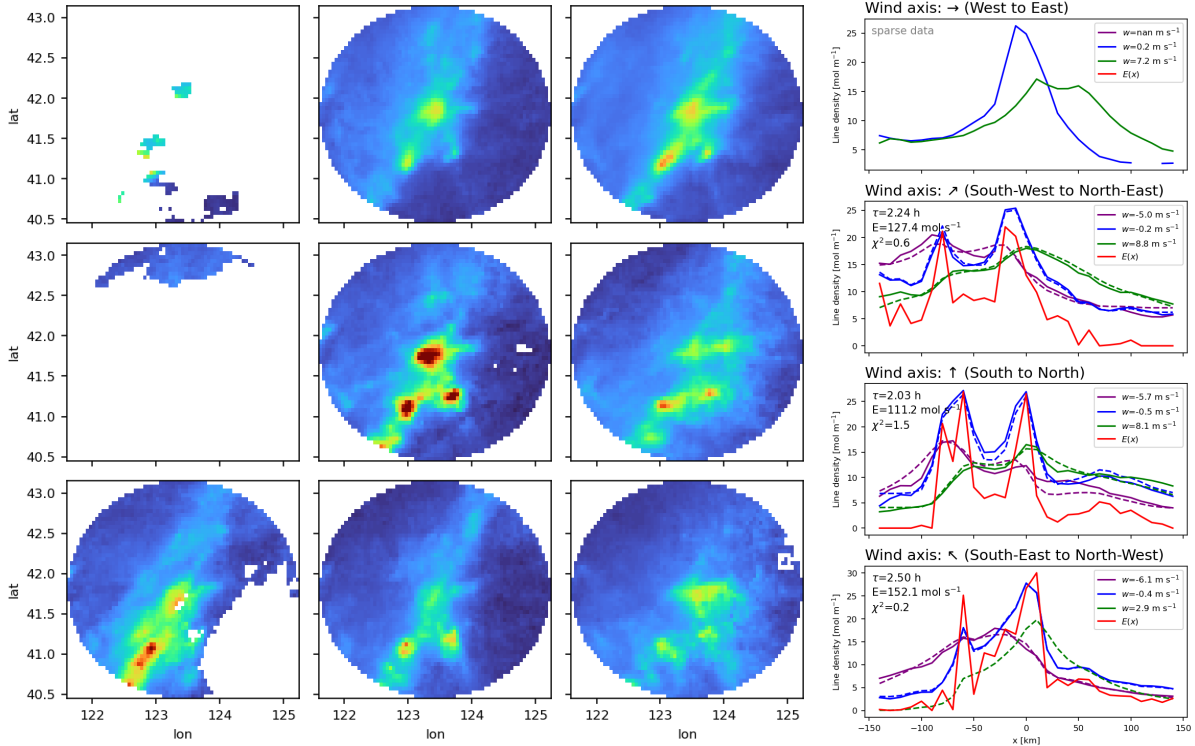

## 17.4 Autumn

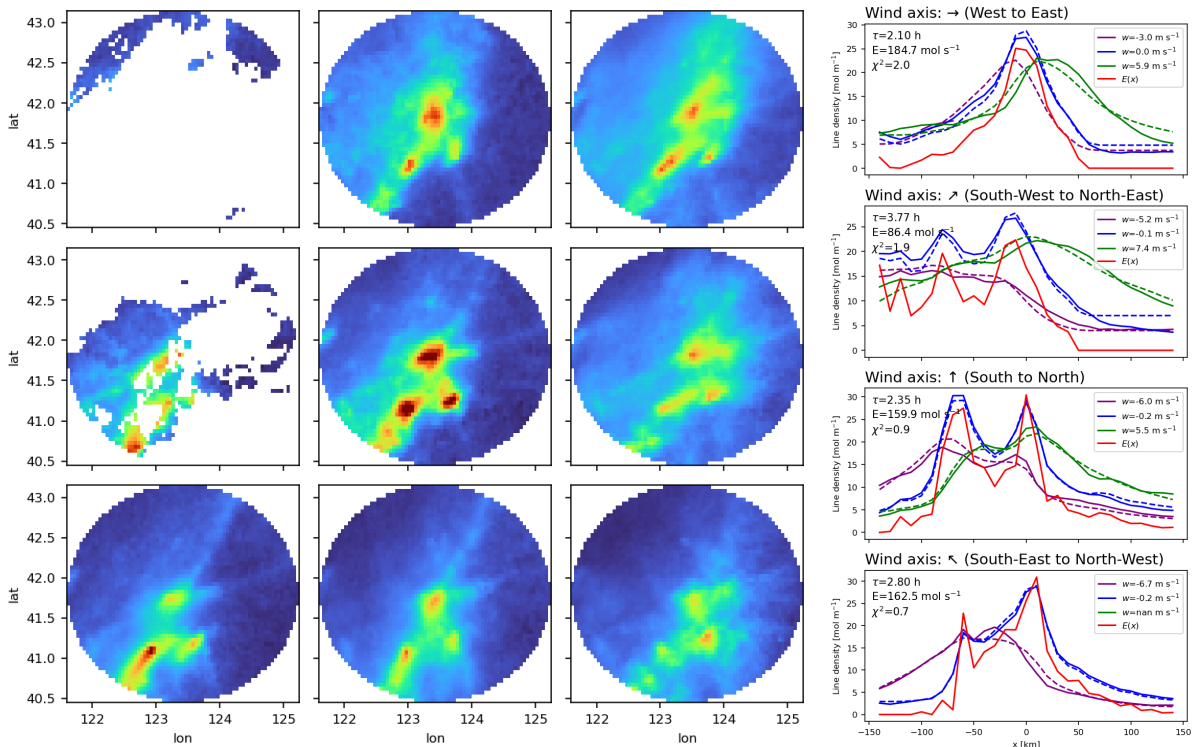

18.1 Winter

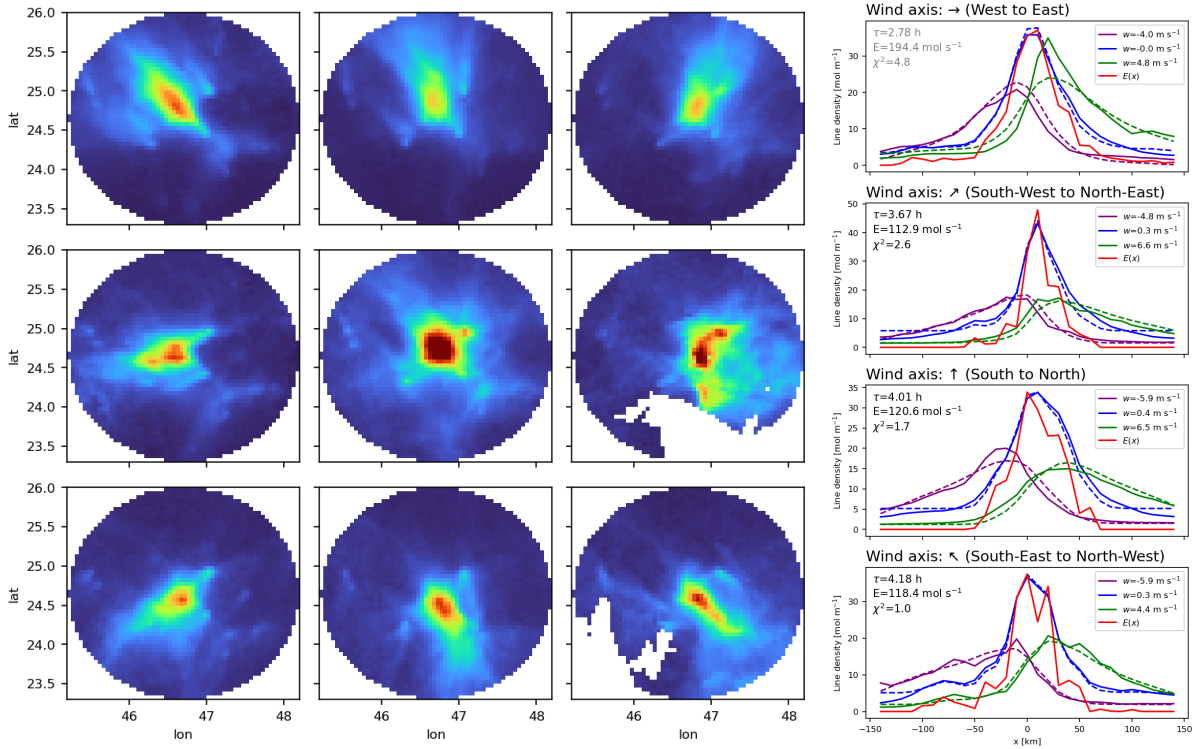

18.2 Spring

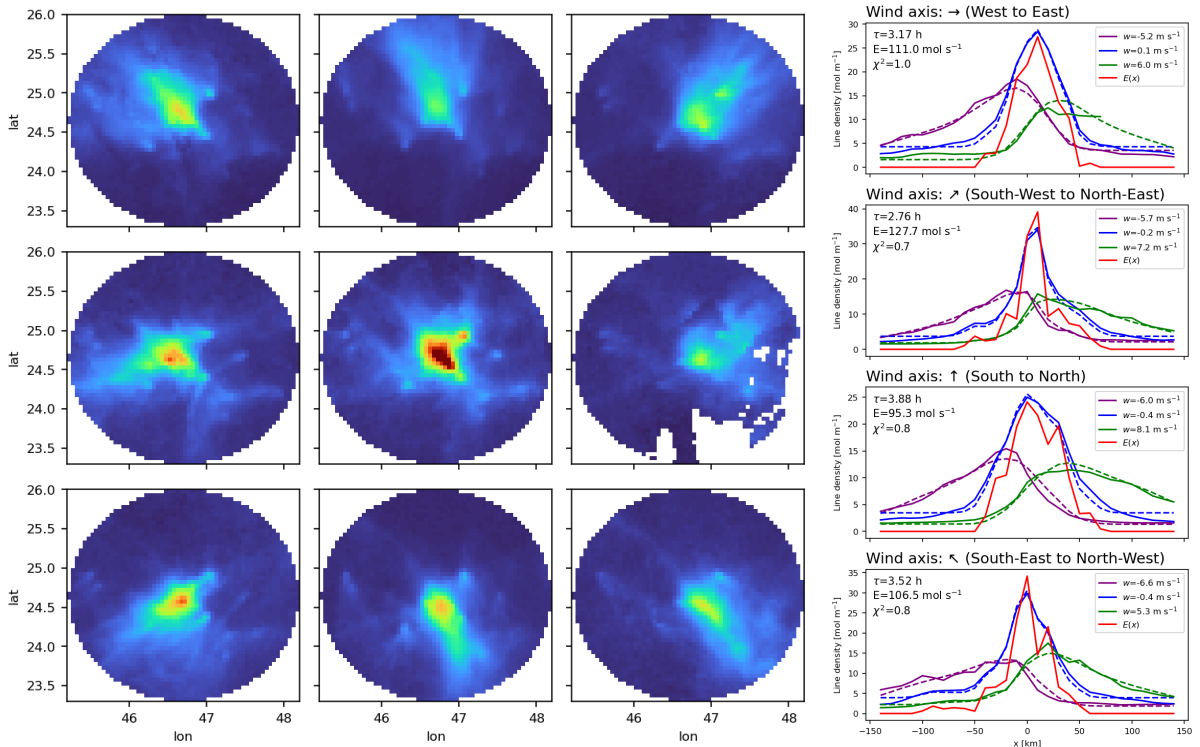

### 18.3 Summer

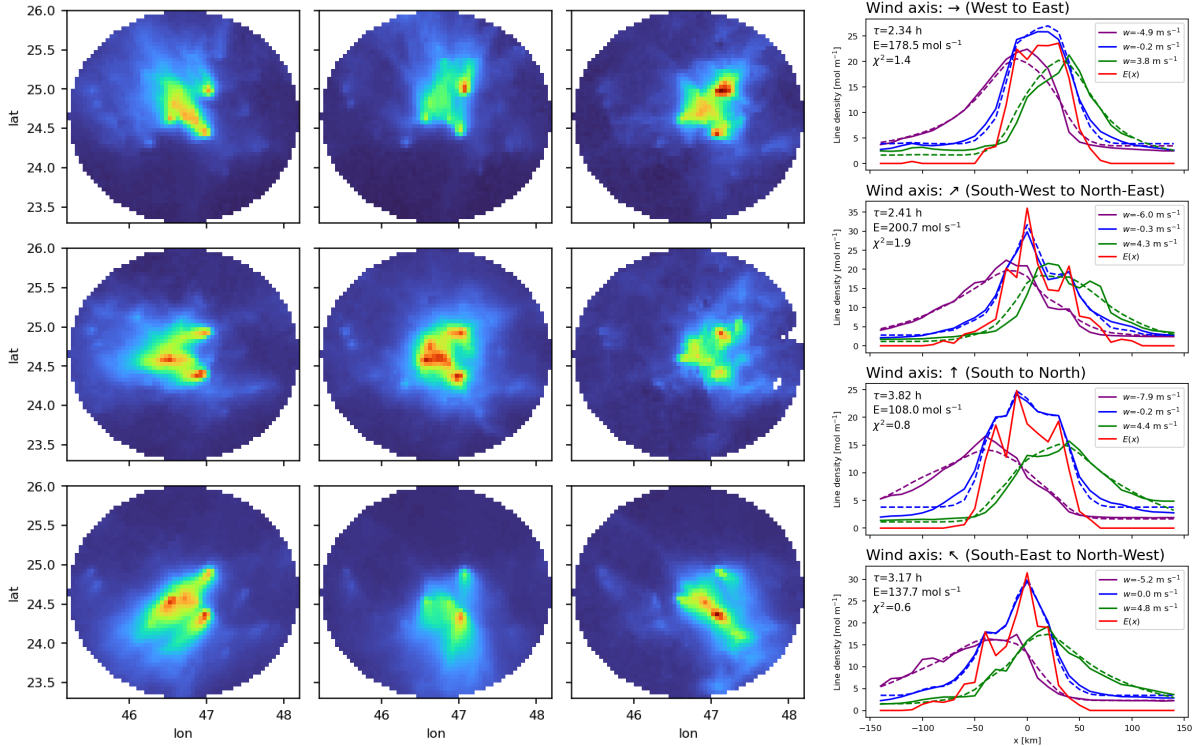

### 18.4 Autumn

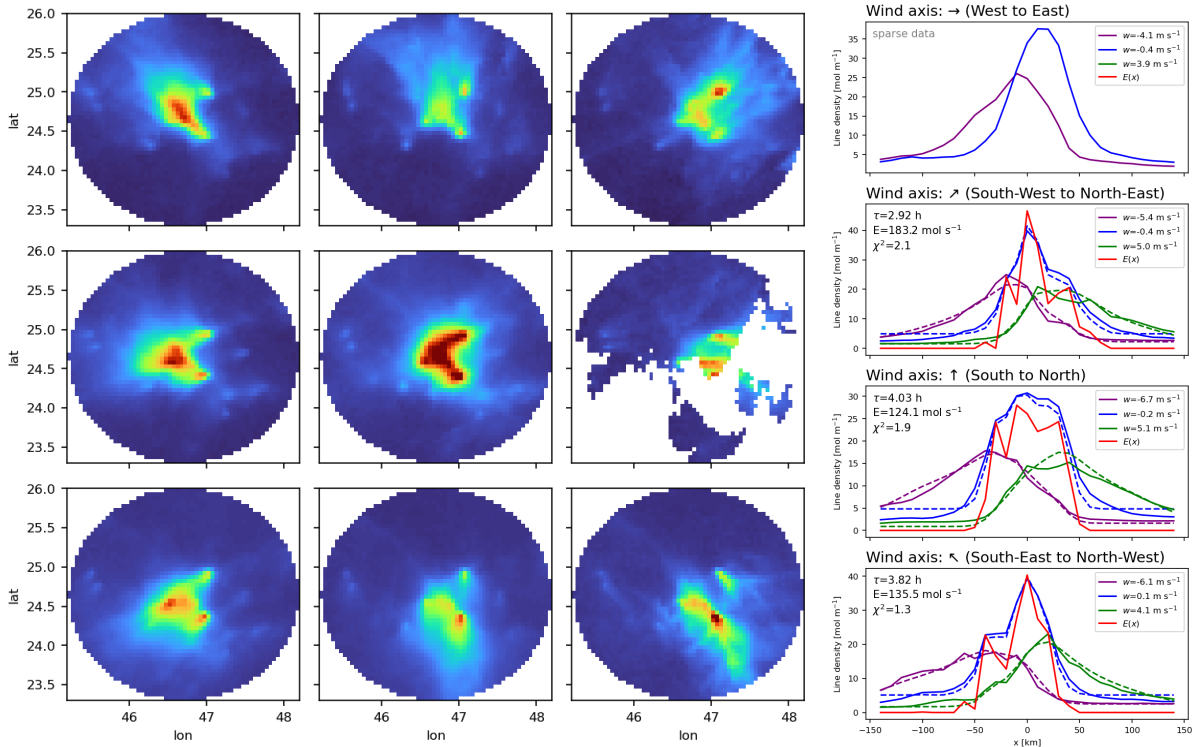

## 19 Miami

### 19.1 Winter

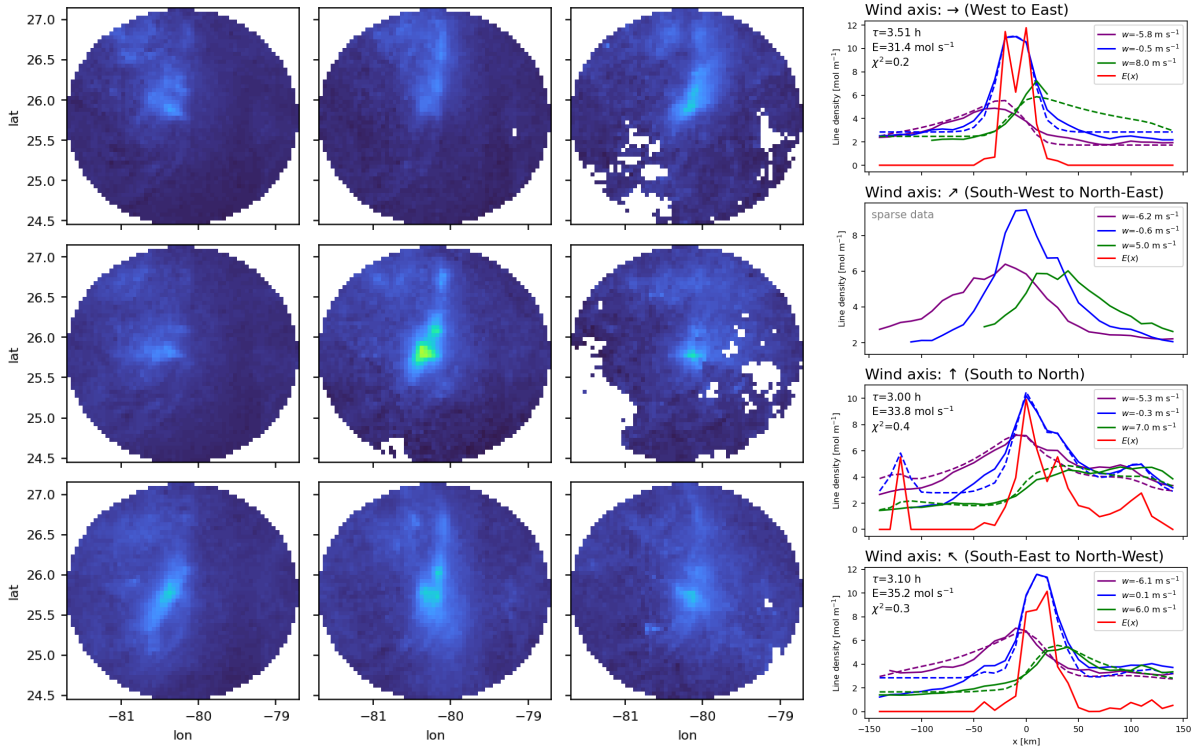

### 19.2 Spring

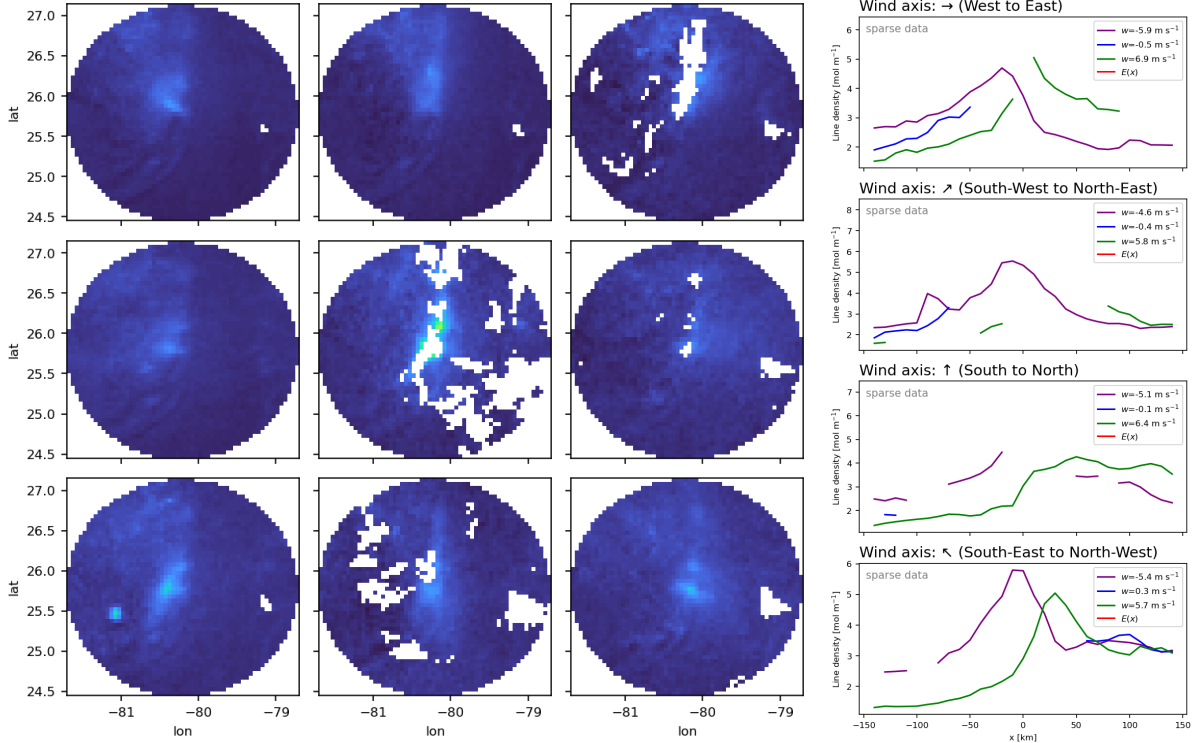

### 19.3 Summer

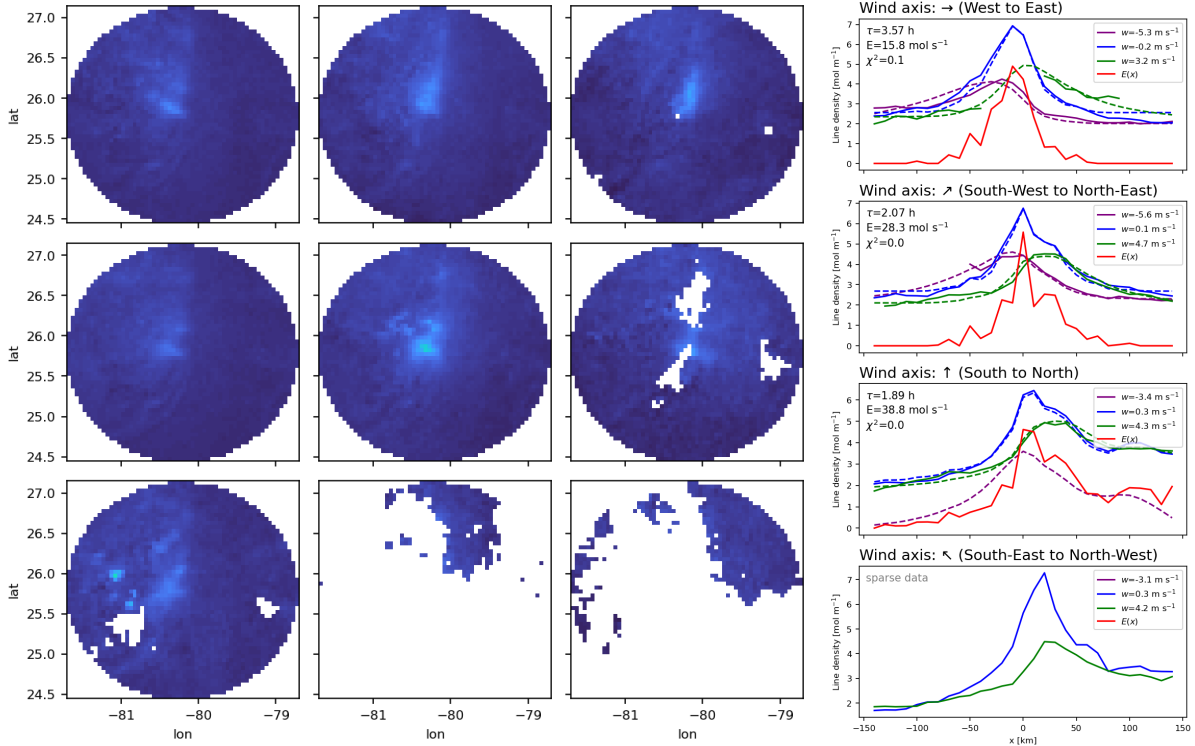

### 19.4 Autumn

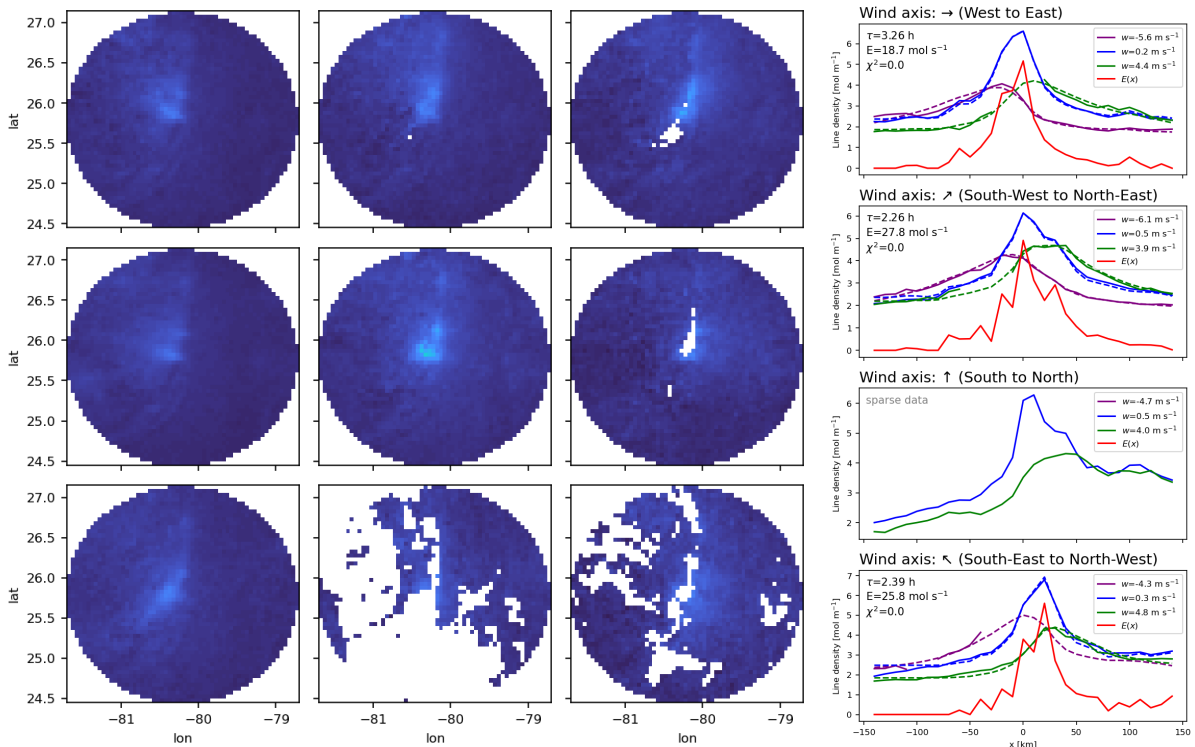



20.1 Winter

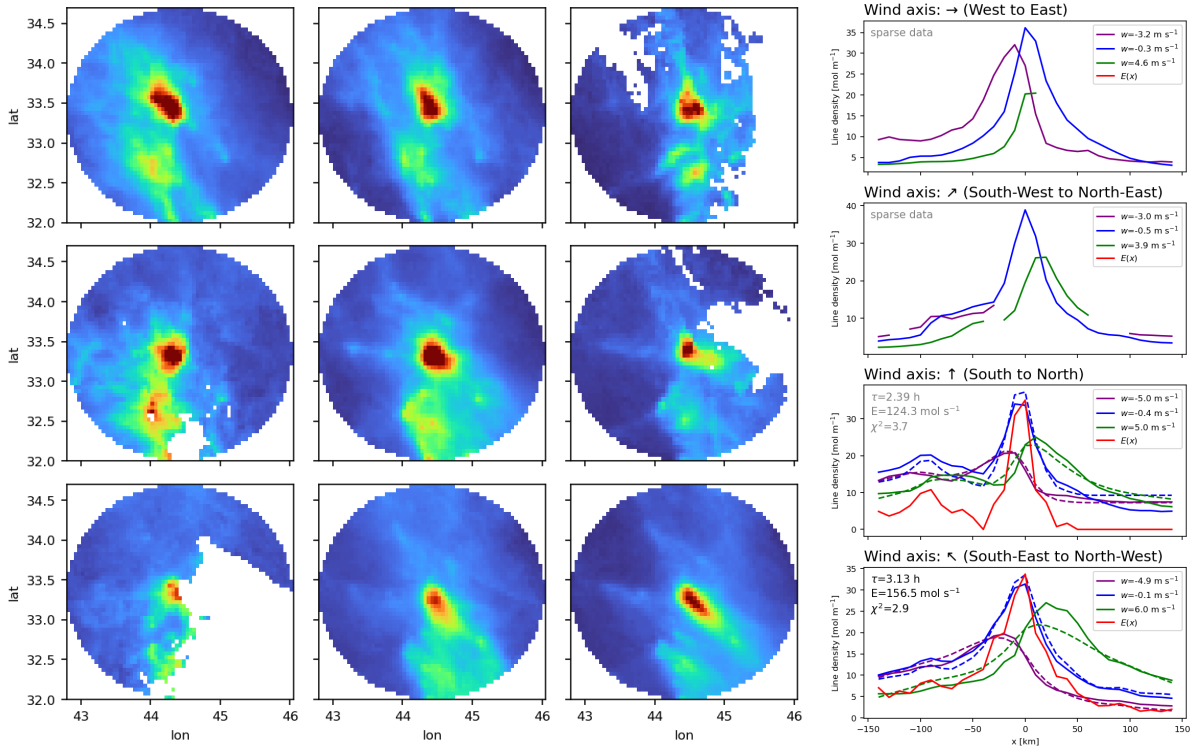

20.2 Spring

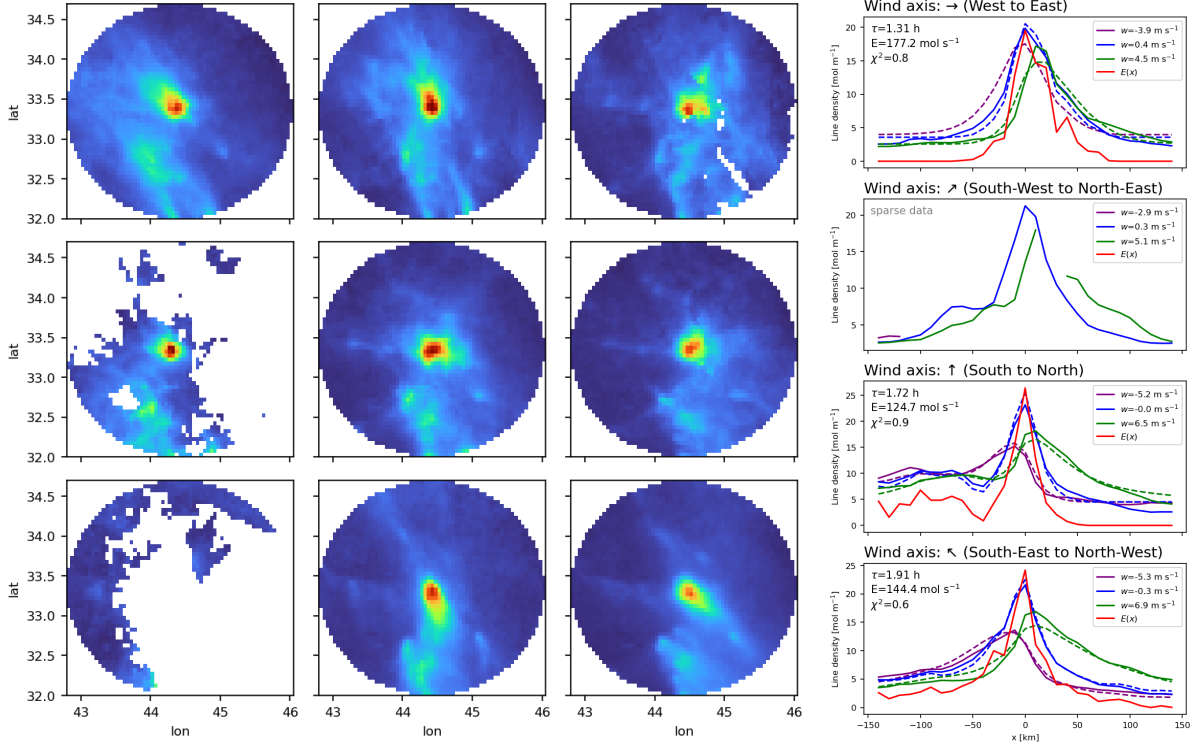

## 20.3 Summer

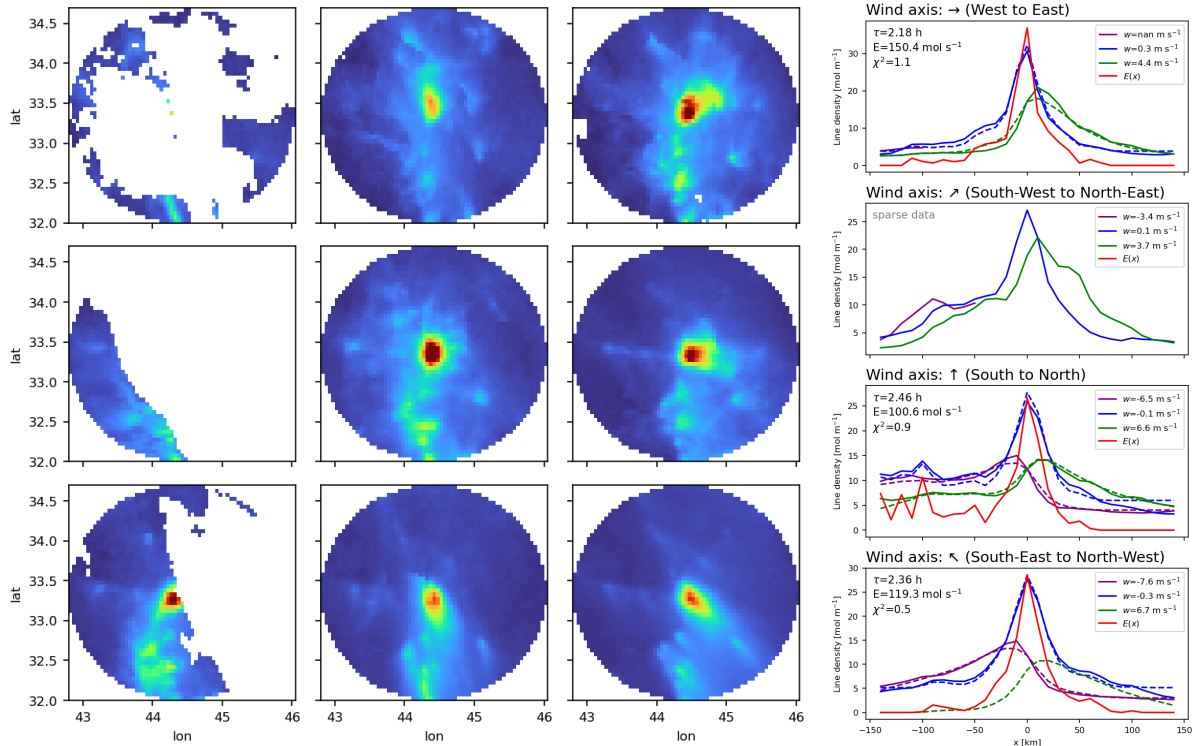

## 20.4 Autumn

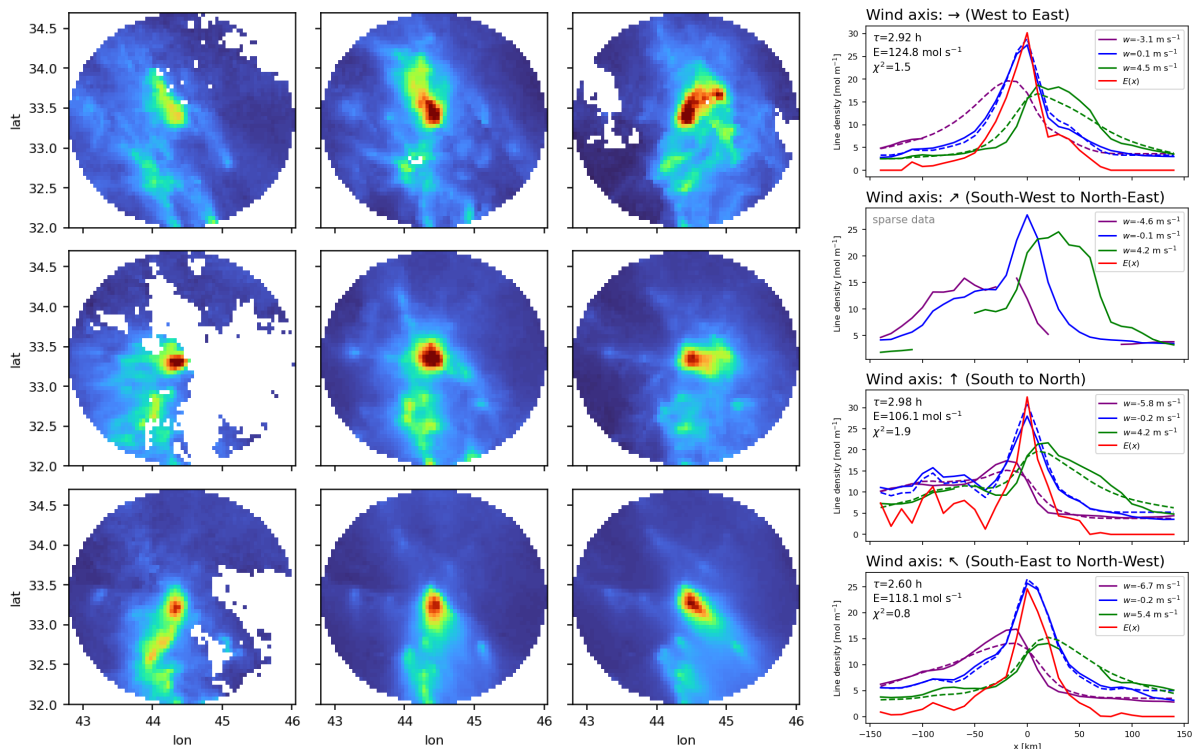

## 21 Khartoum

### 21.1 Winter

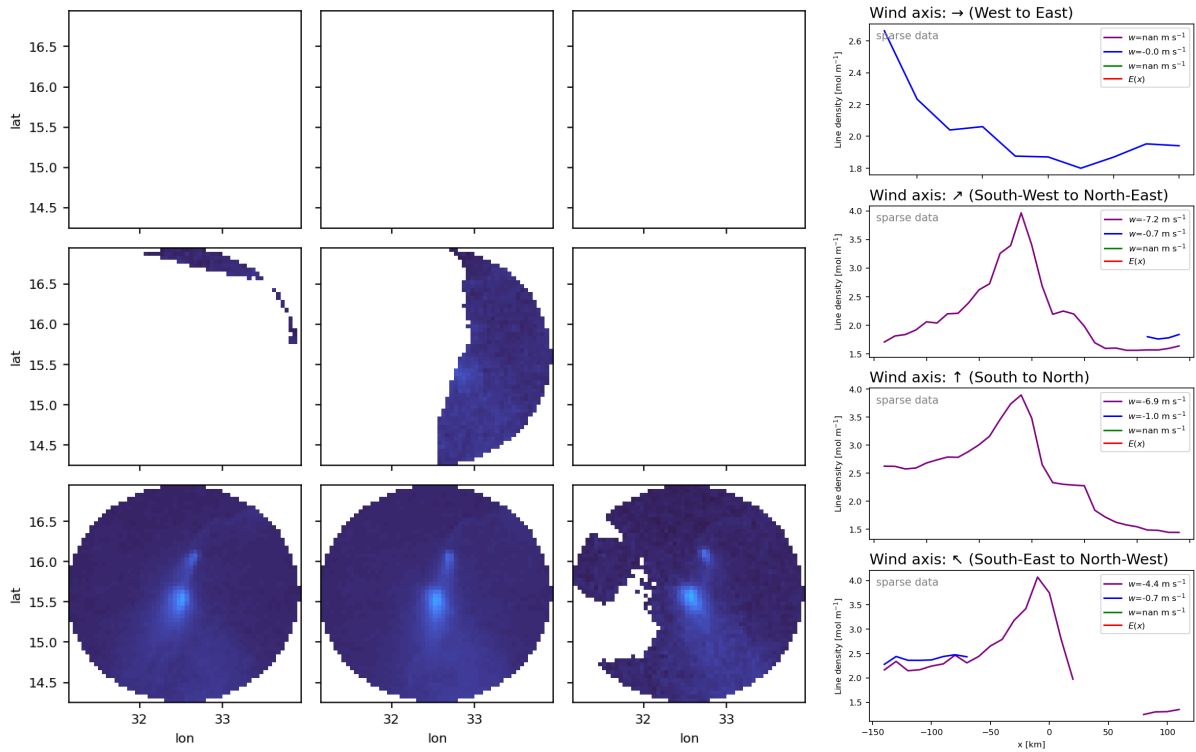

### 21.2 Spring

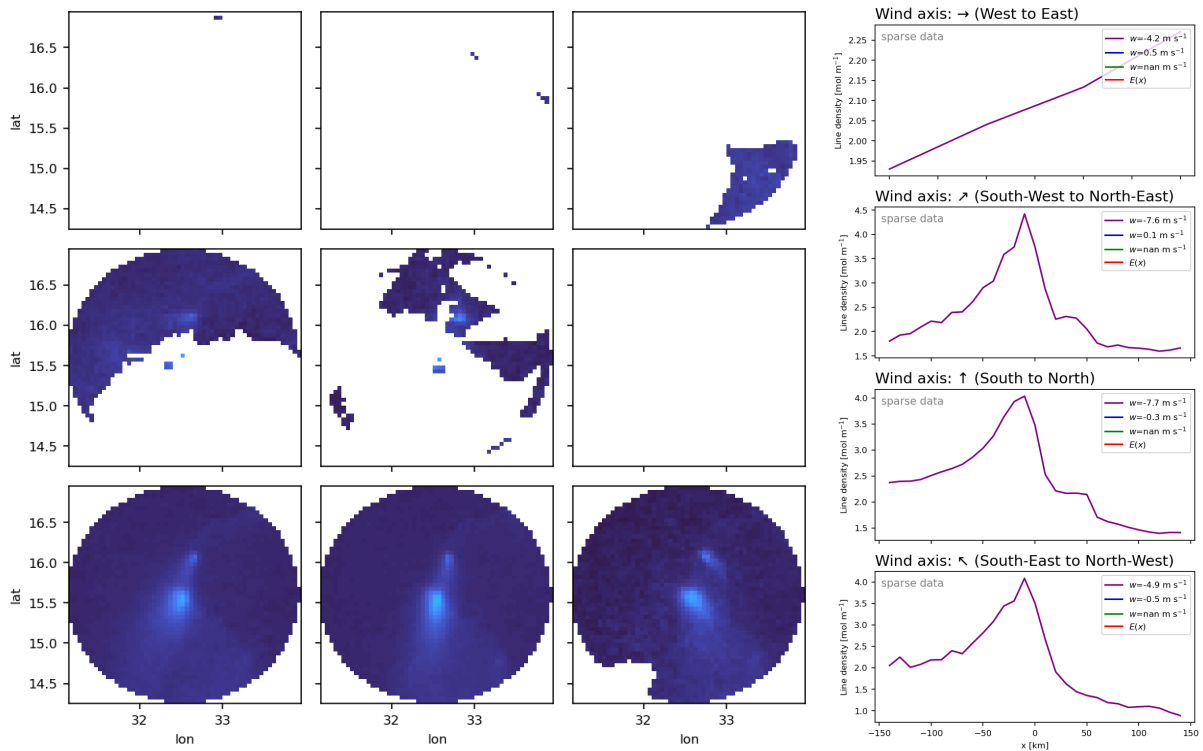

## 21.3 Summer

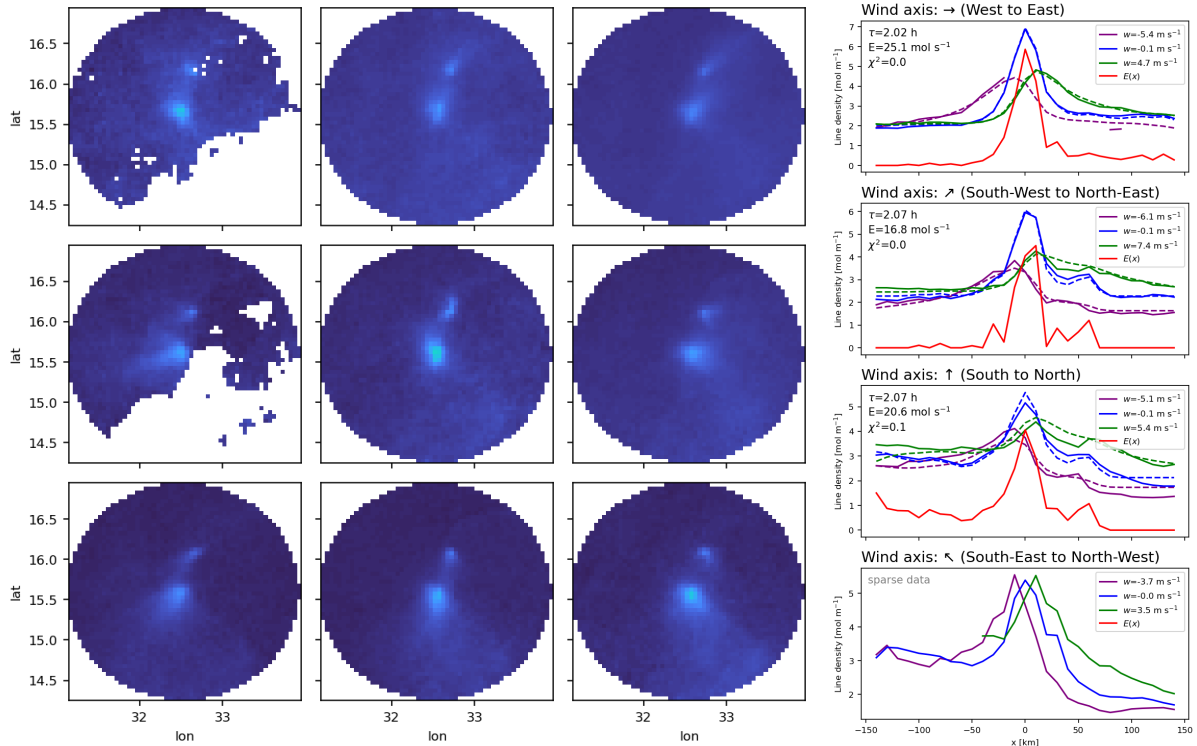

## 21.4 Autumn

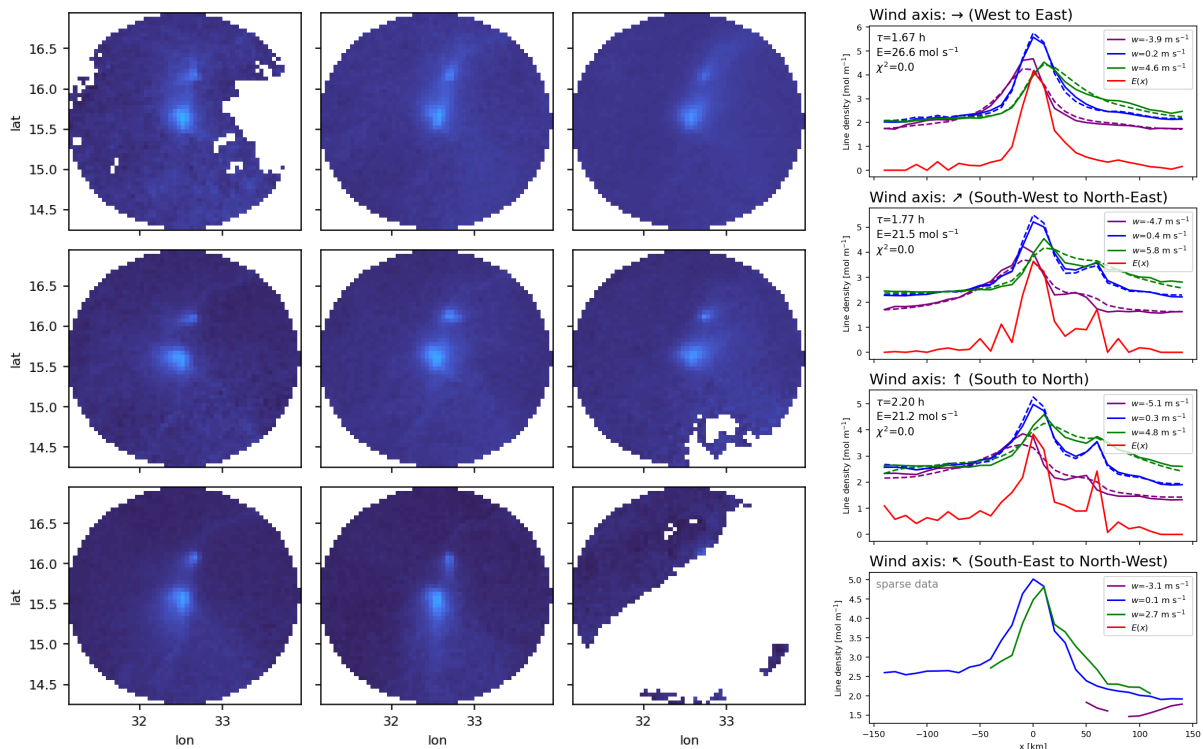

22.1 Winter

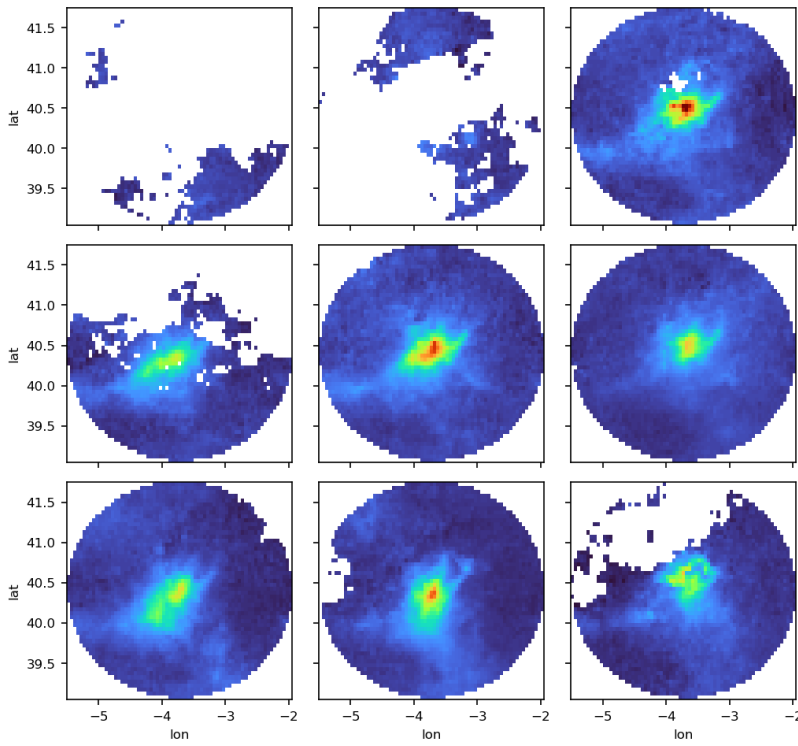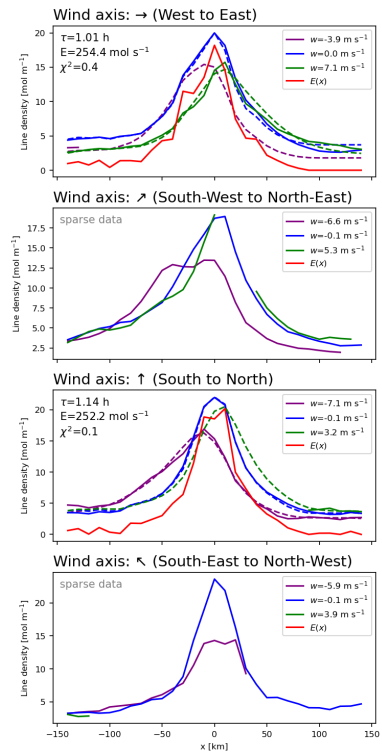

22.2 Spring

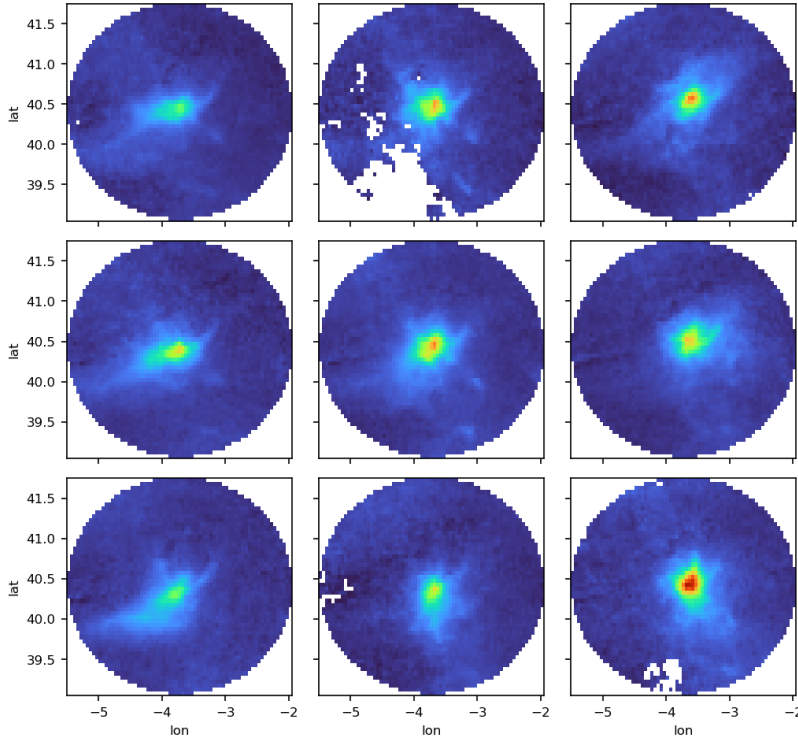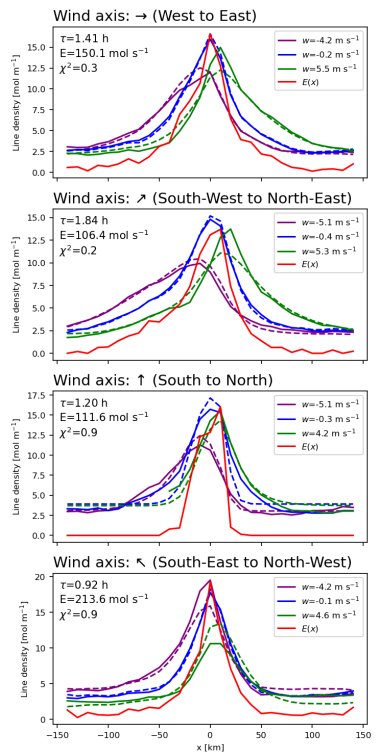

## 22.3 Summer

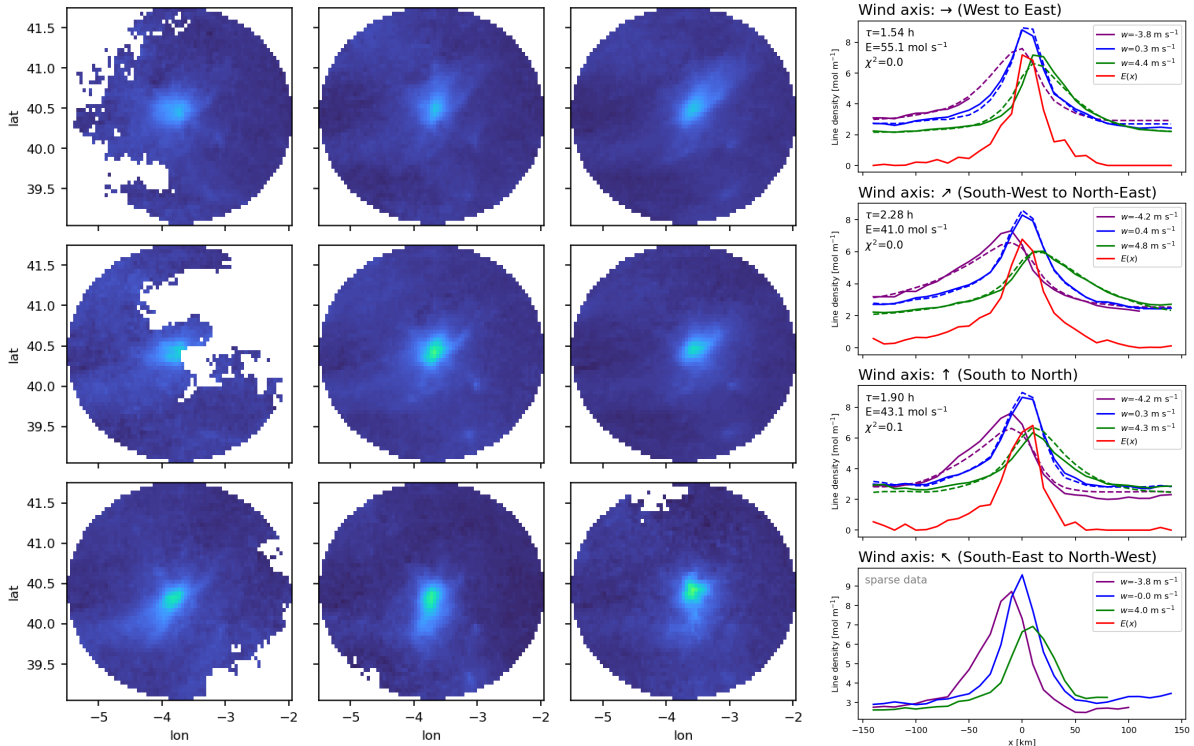

## 22.4 Autumn

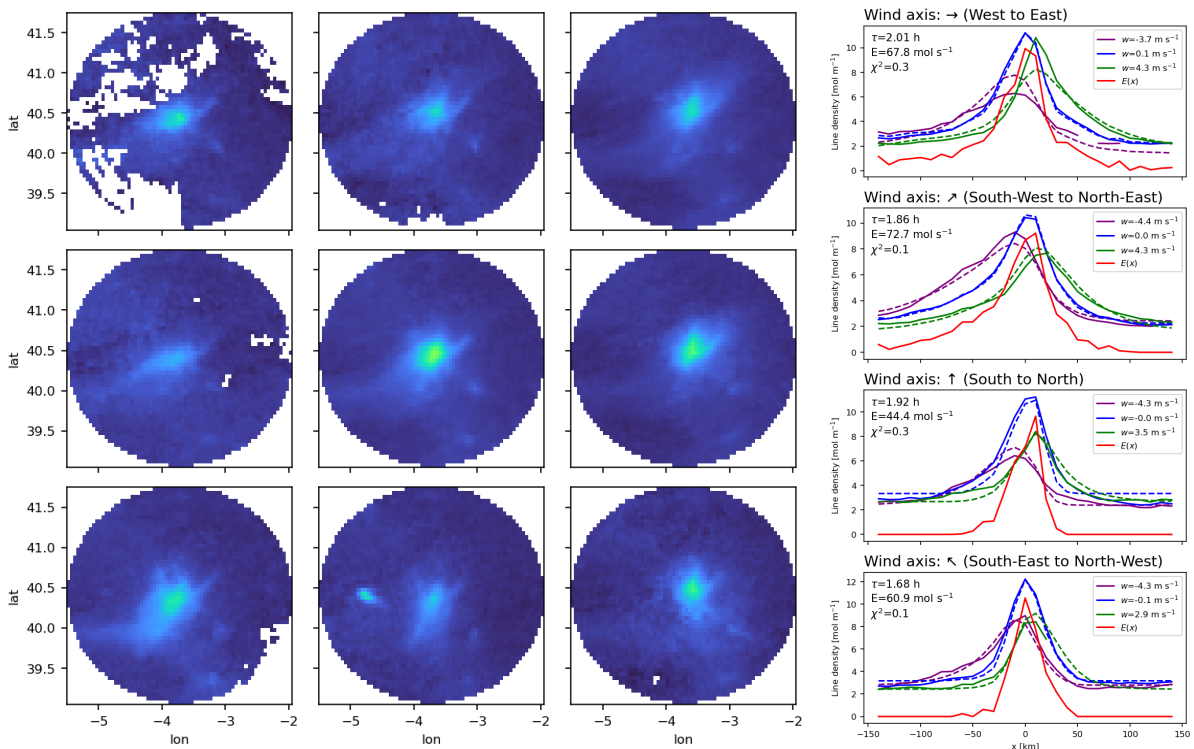

## 23 Dallas

### 23.1 Winter

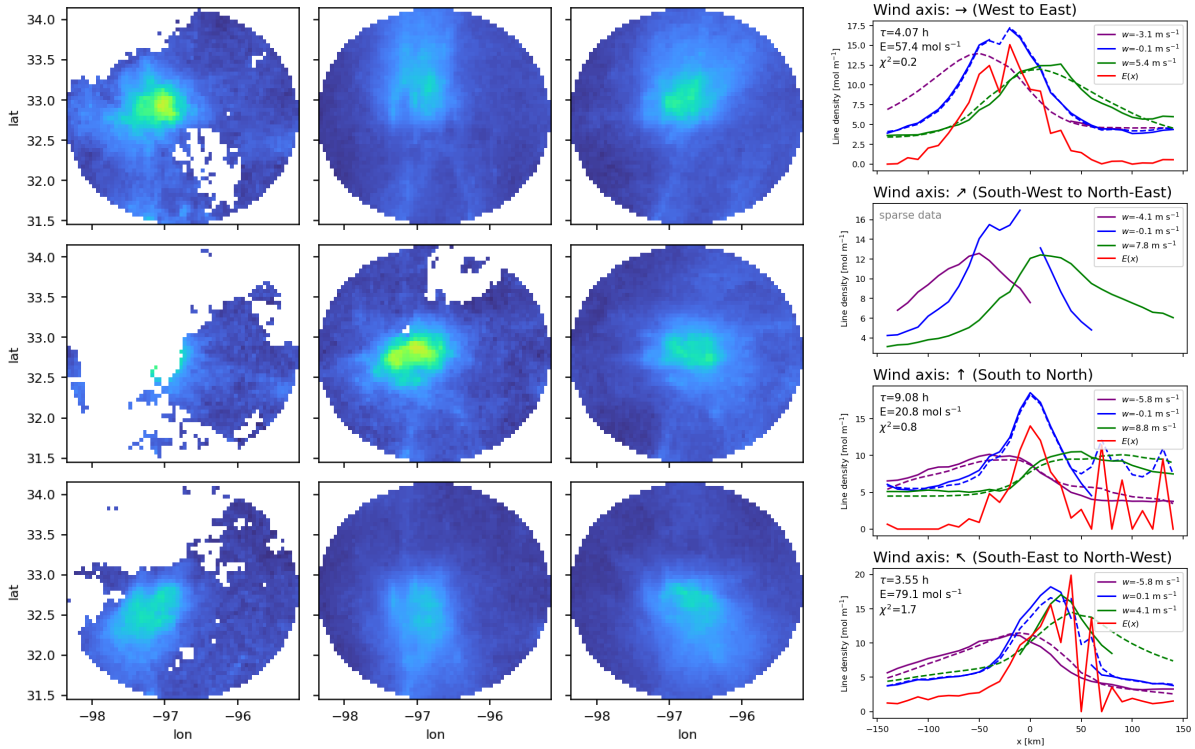

### 23.2 Spring

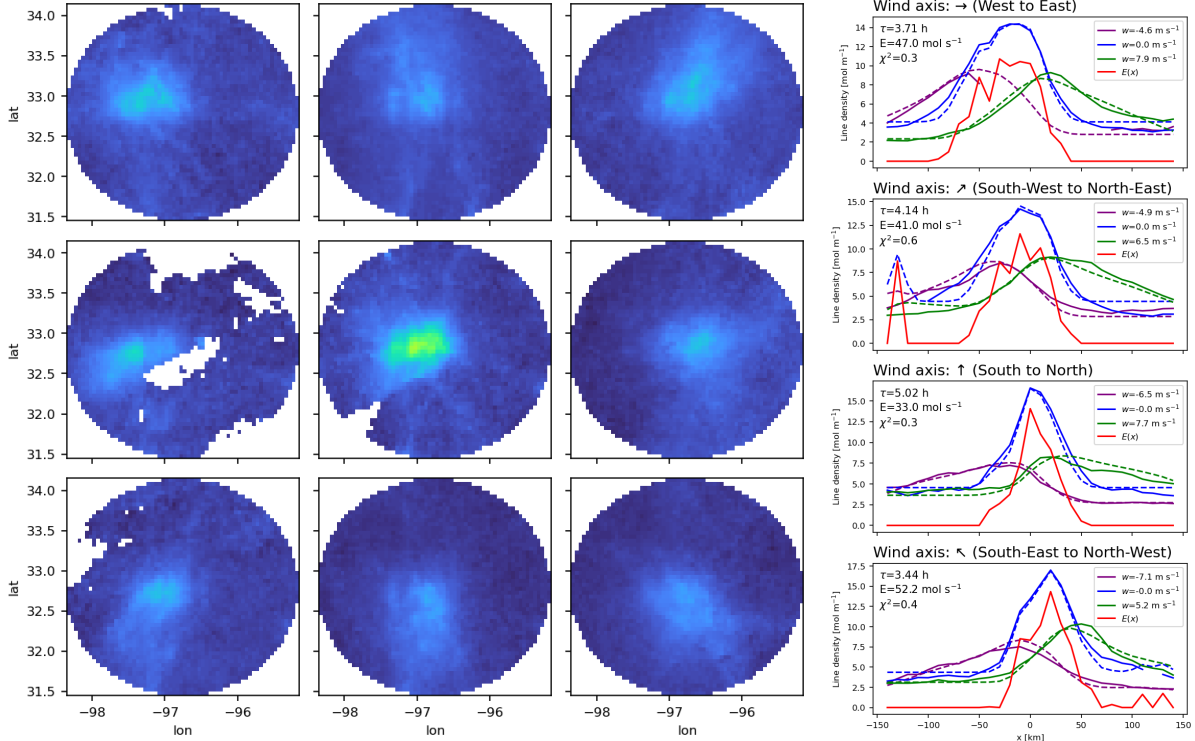

### 23.3 Summer

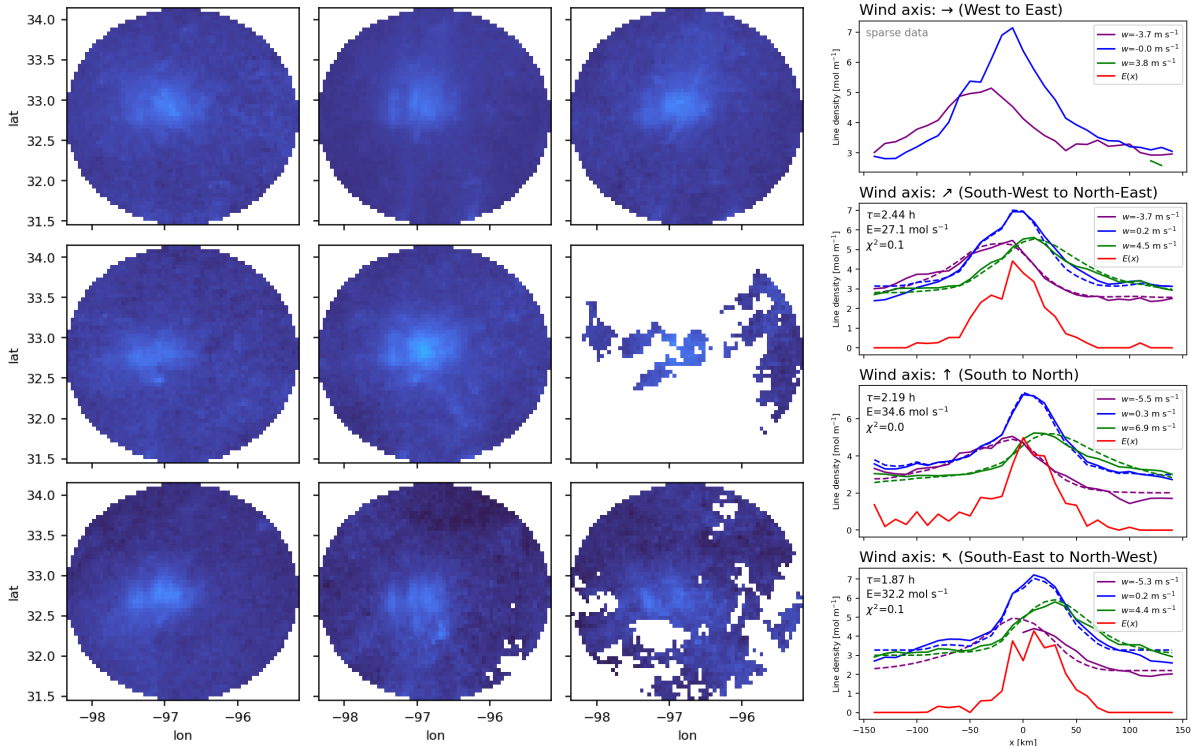

### 23.4 Autumn

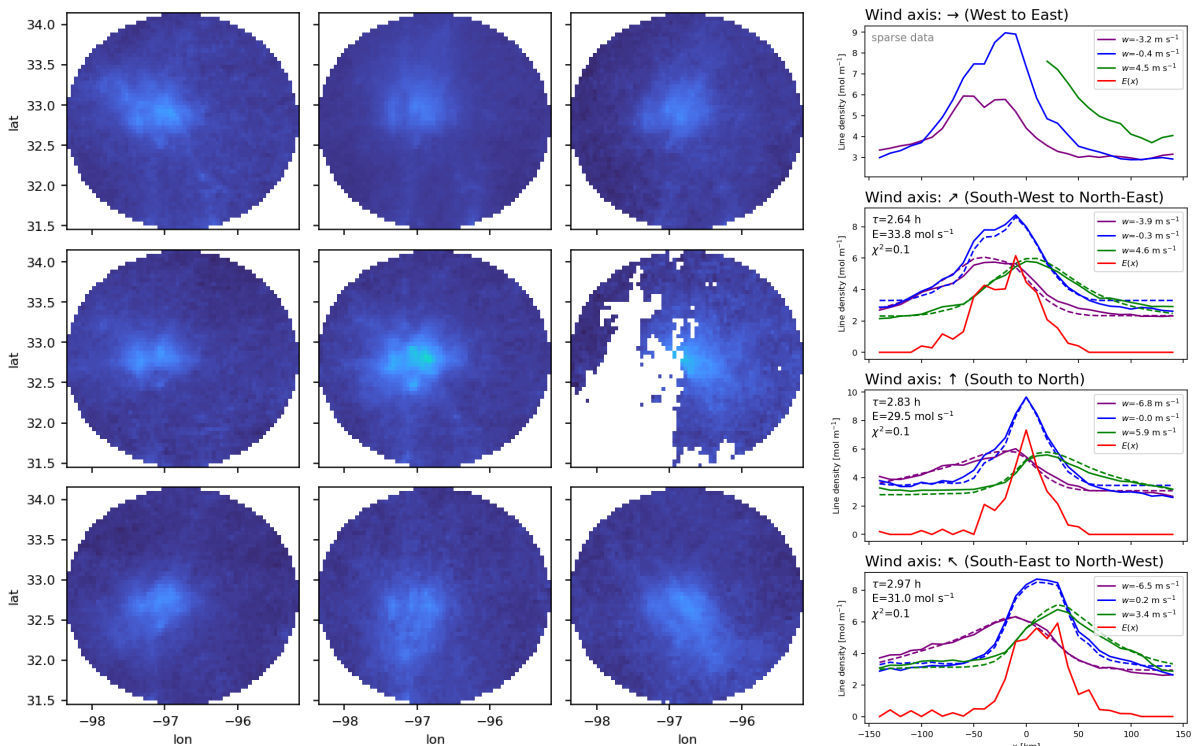



24.1 Winter

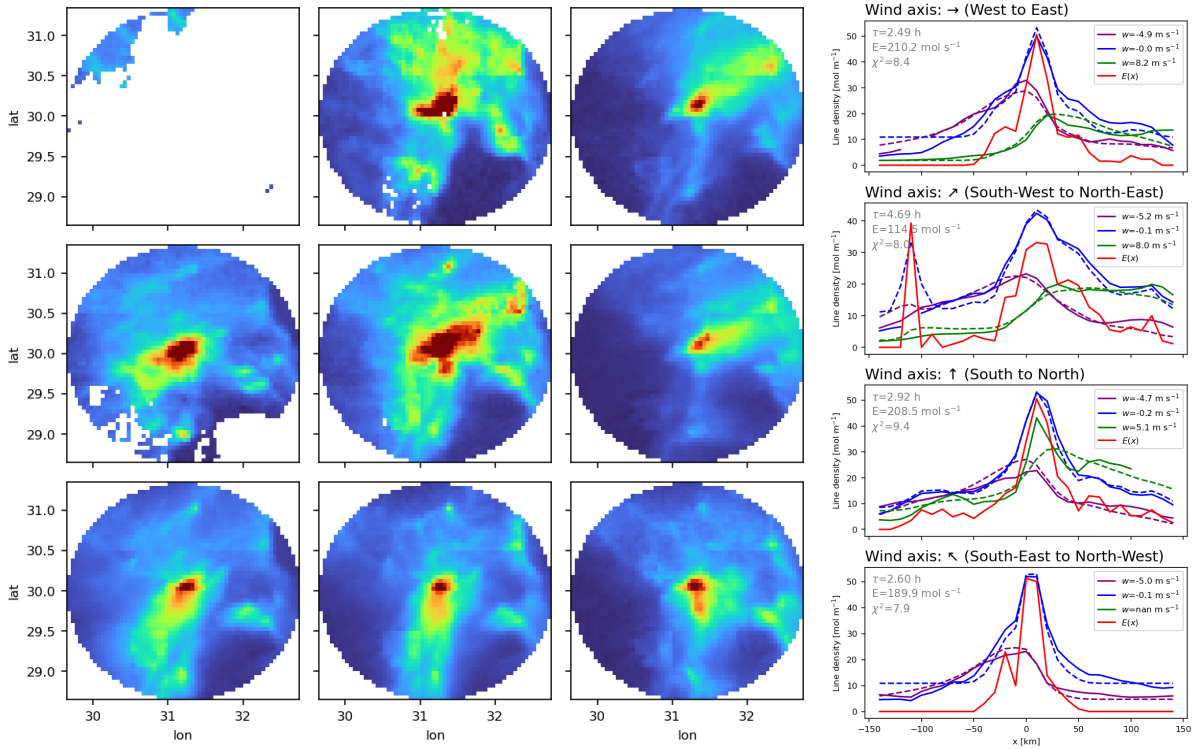

24.2 Spring

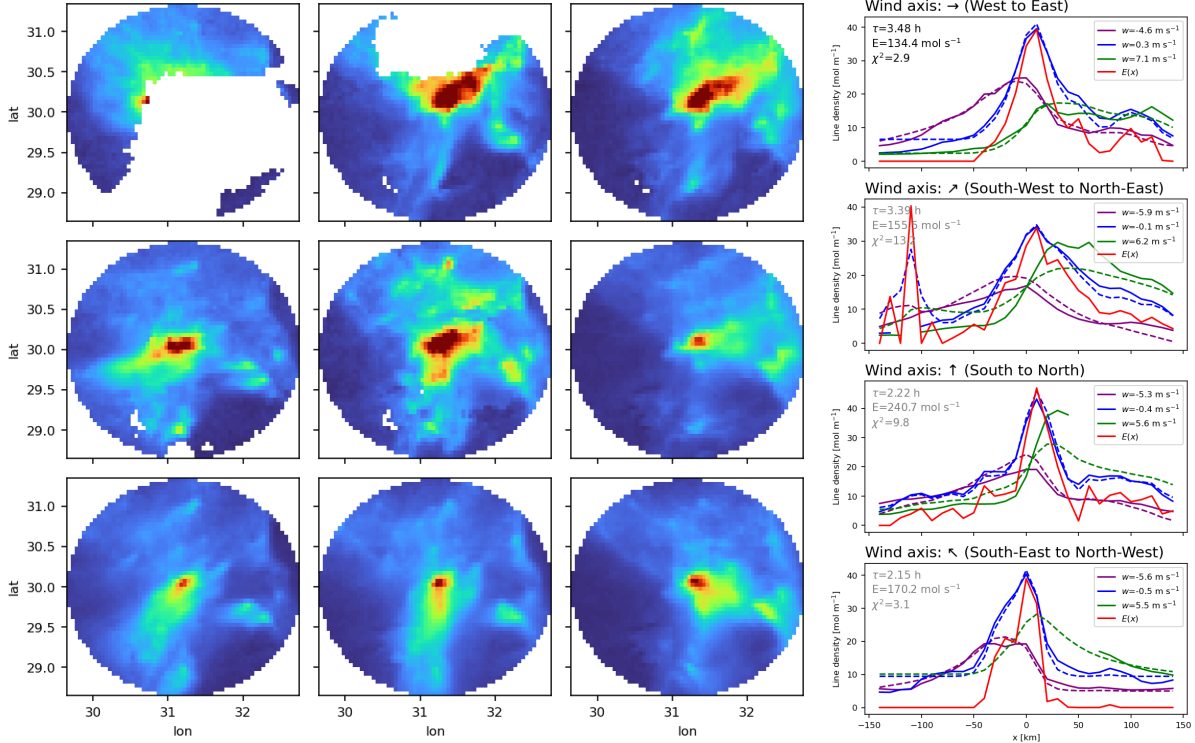

## 24.3 Summer

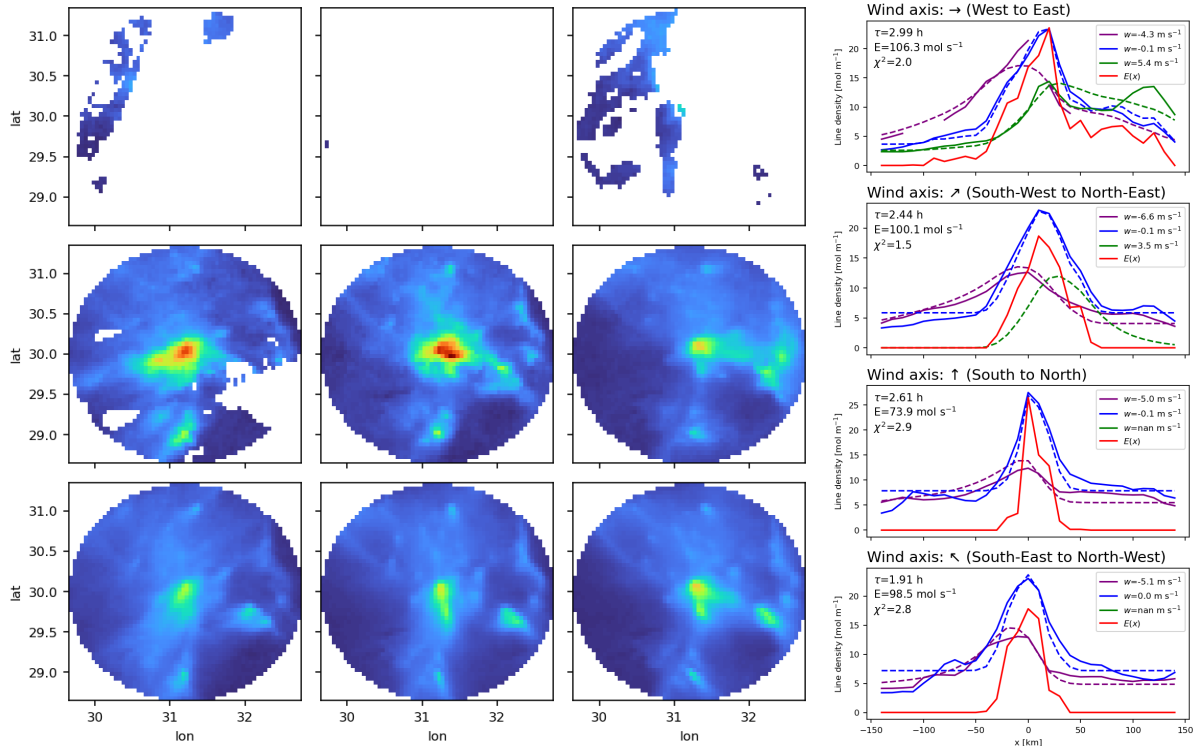

## 24.4 Autumn

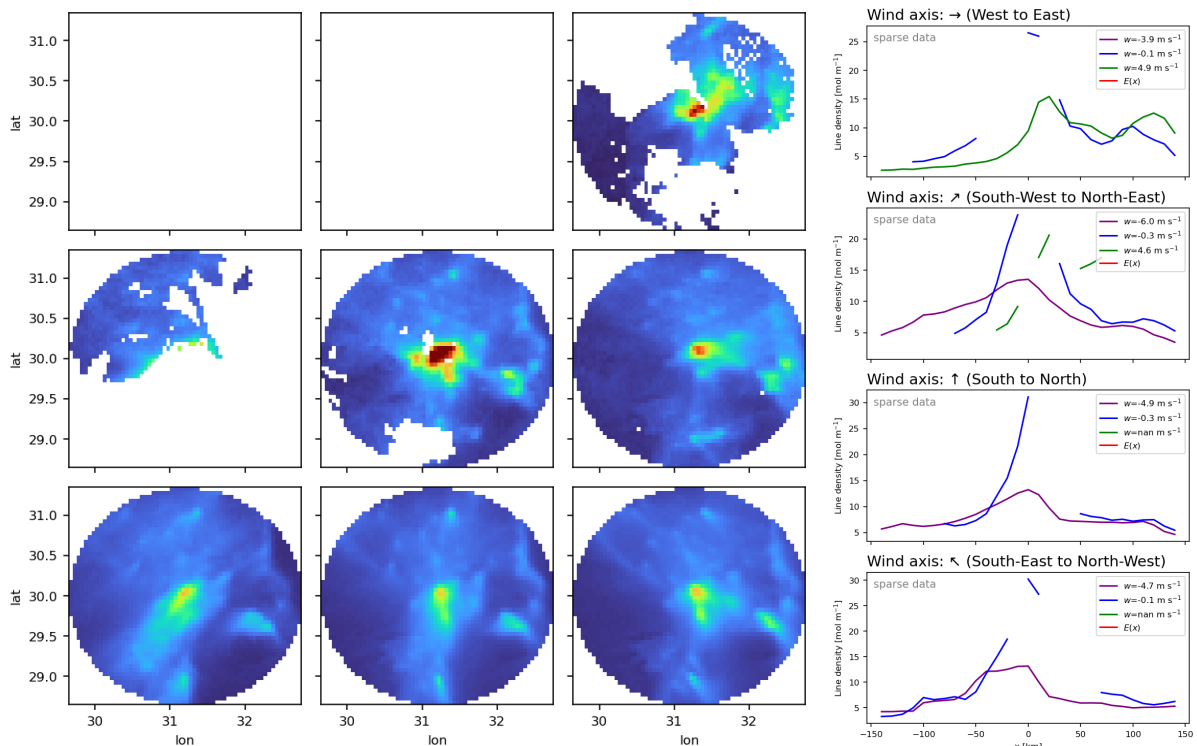

## 25 Houston

### 25.1 Winter

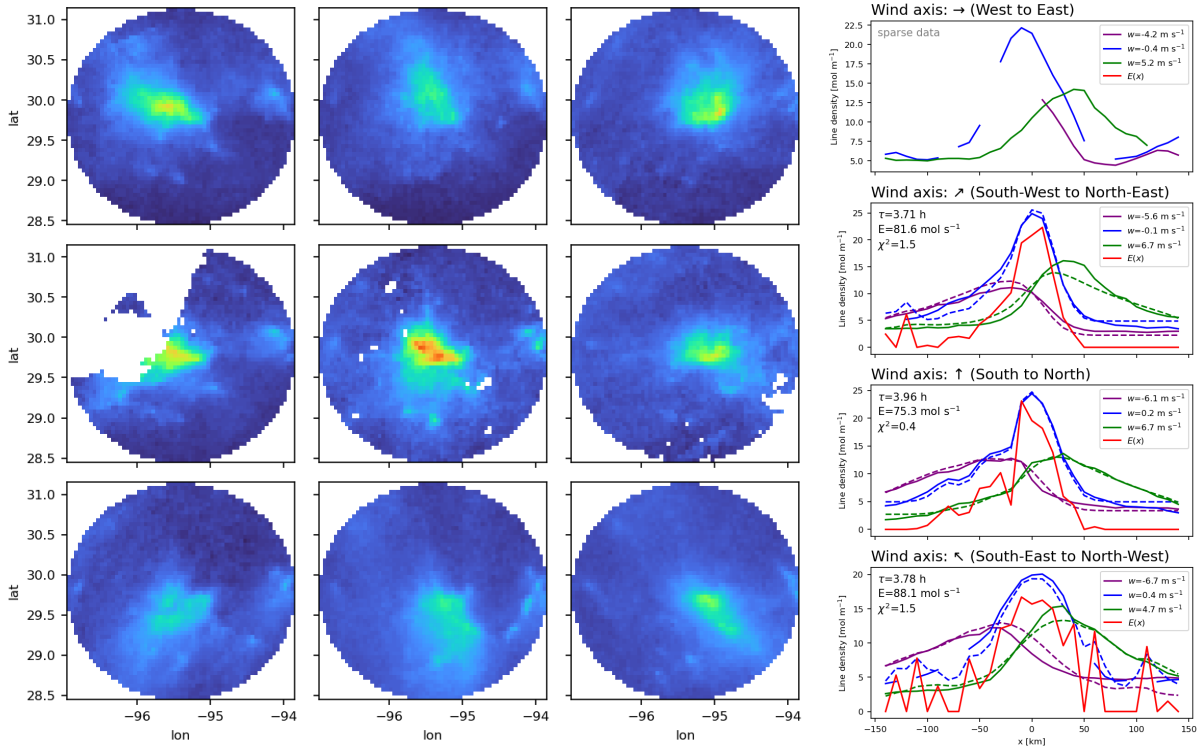

### 25.2 Spring

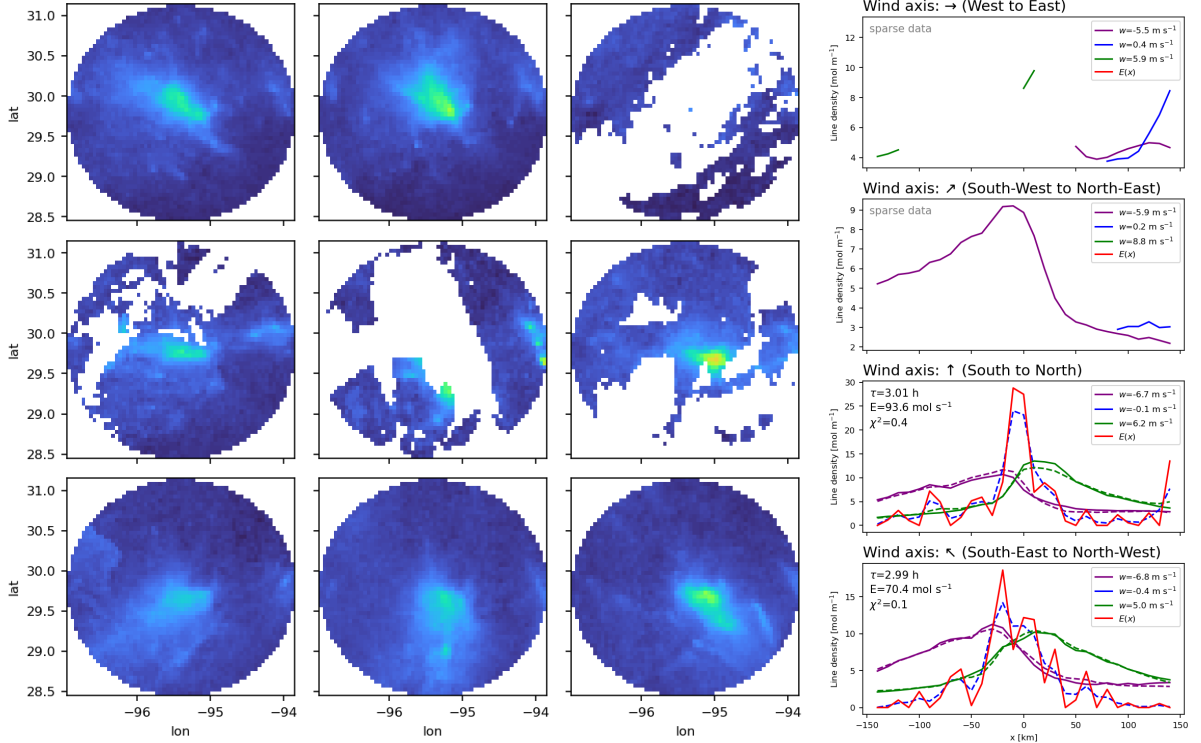

## 25.3 Summer

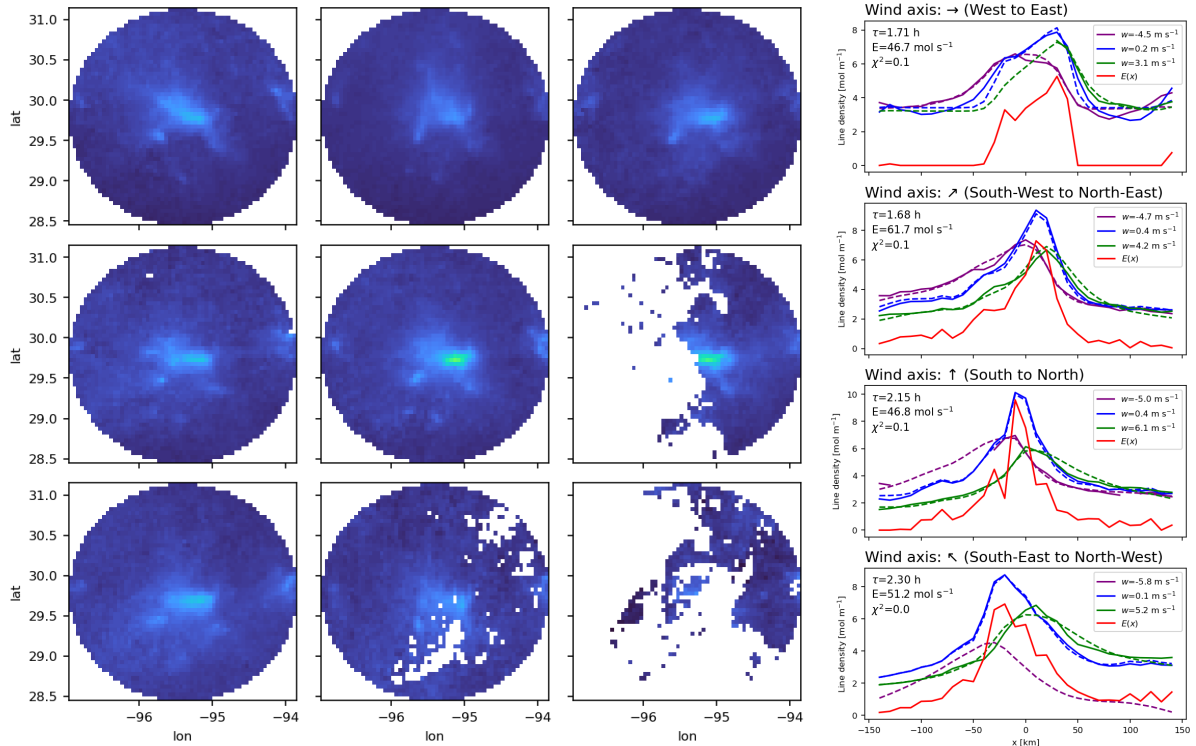

## 25.4 Autumn

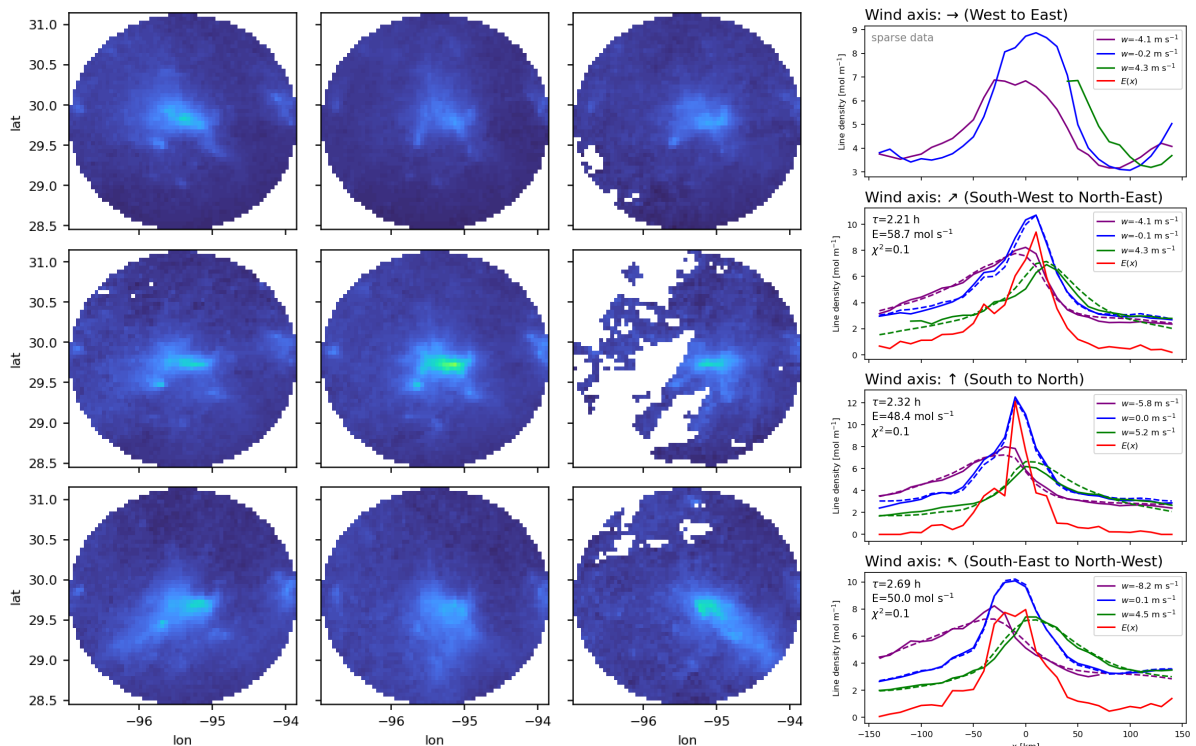

26.1 Winter

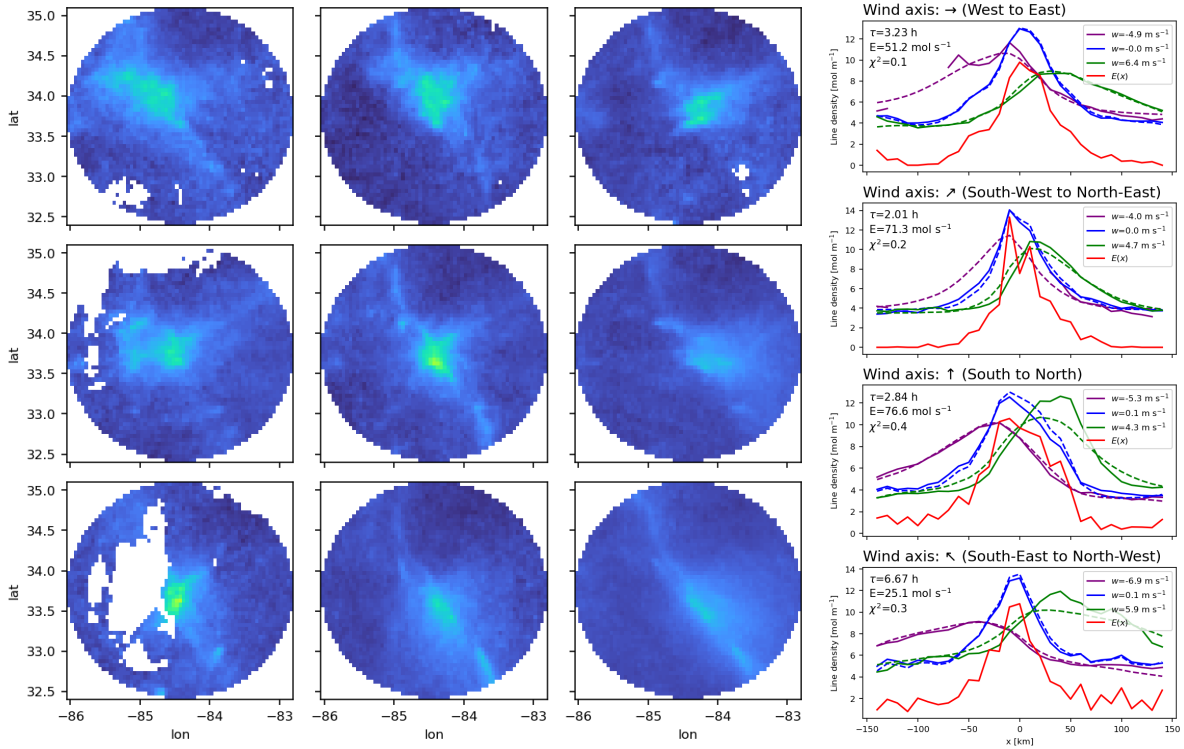

26.2 Spring

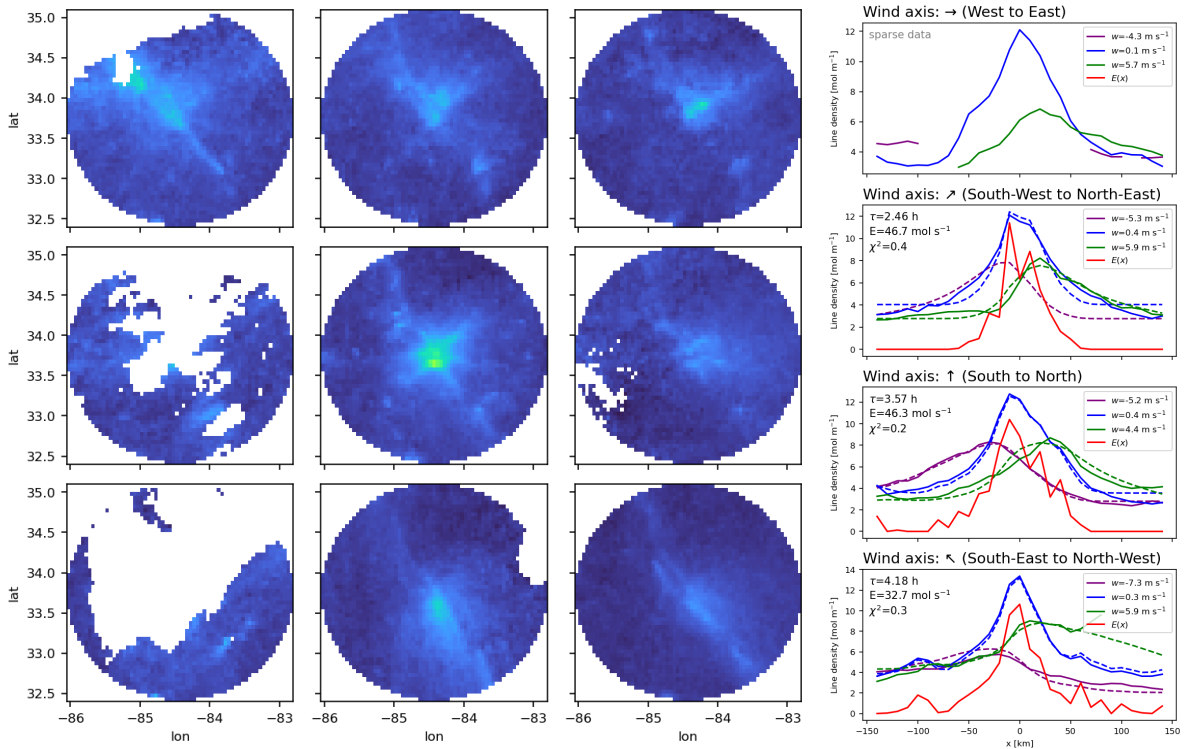

## 26.3 Summer

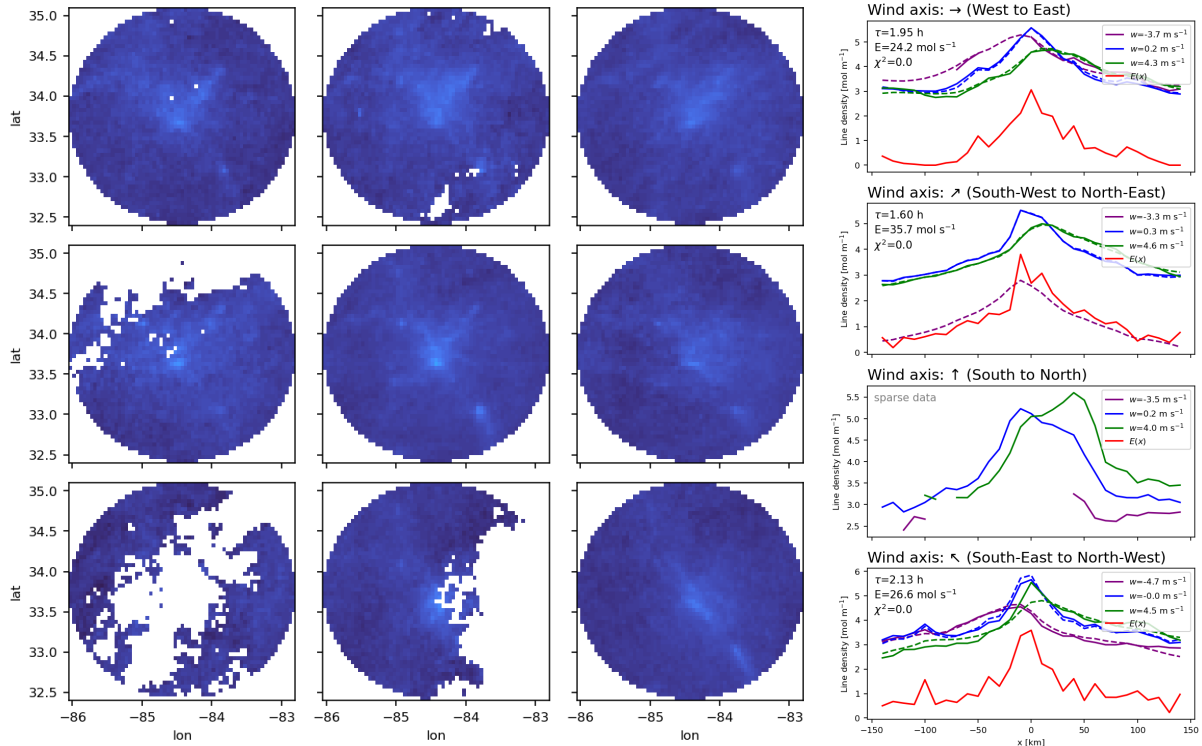

## 26.4 Autumn

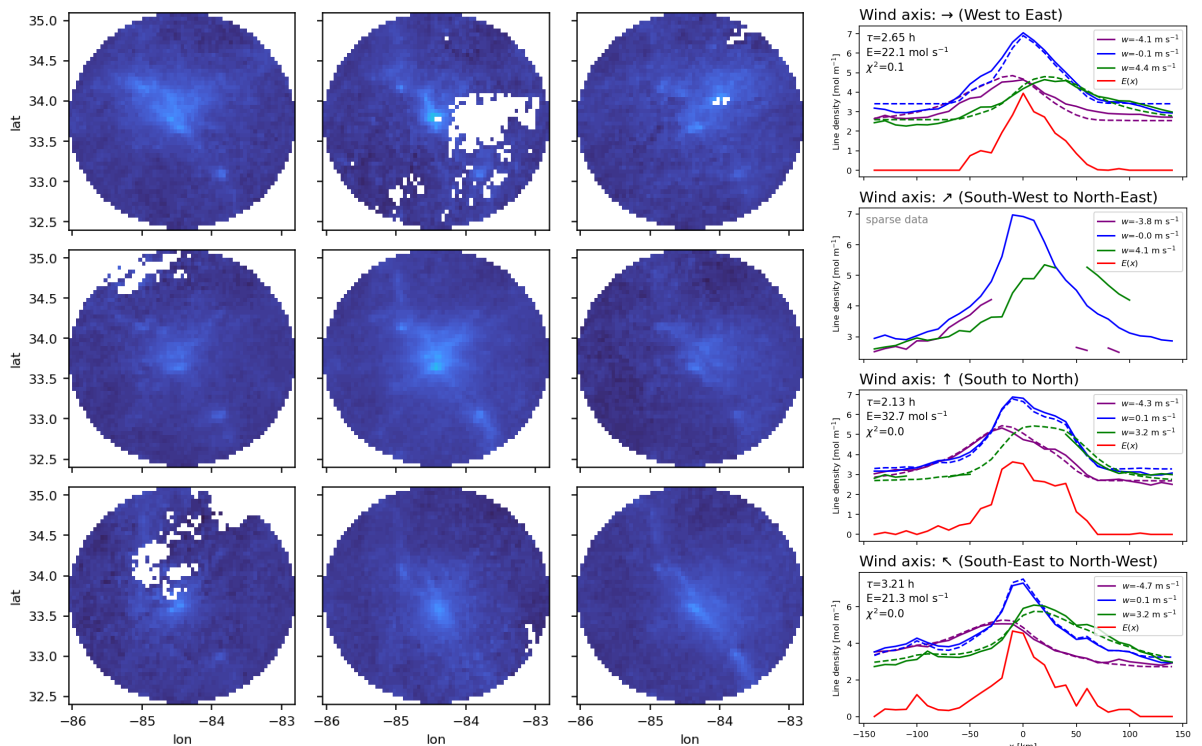

## 27 Toronto

### 27.1 Winter

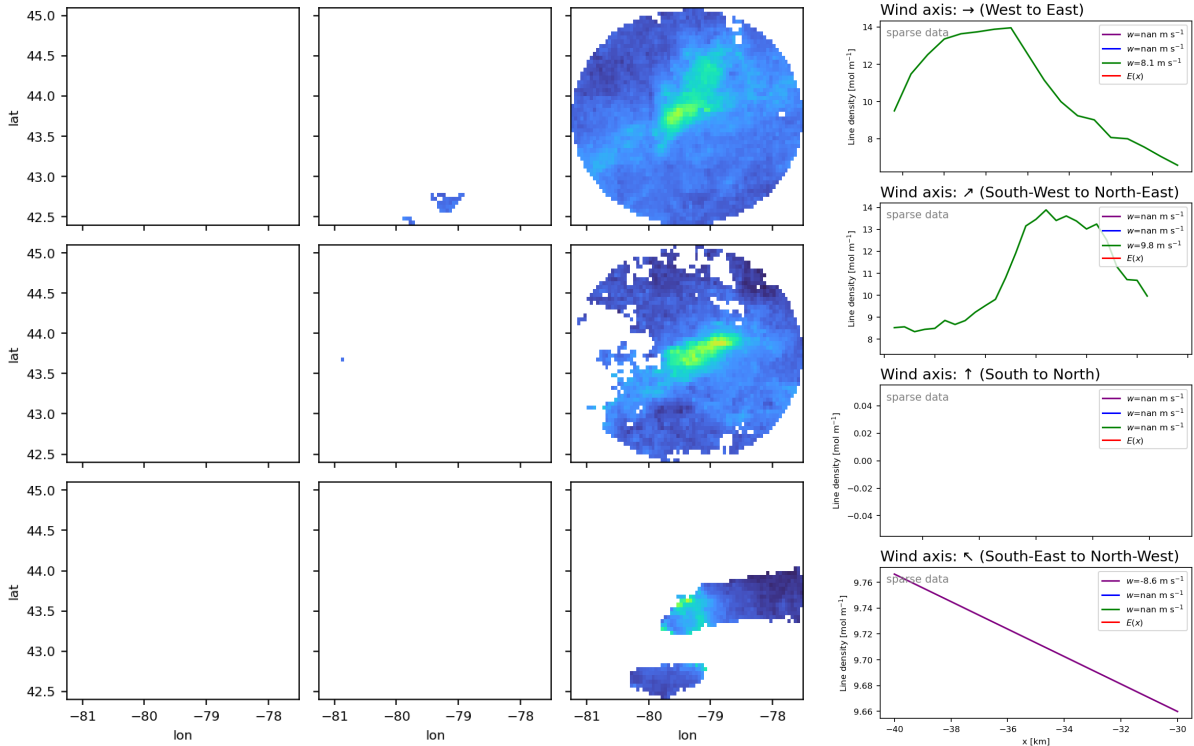

### 27.2 Spring

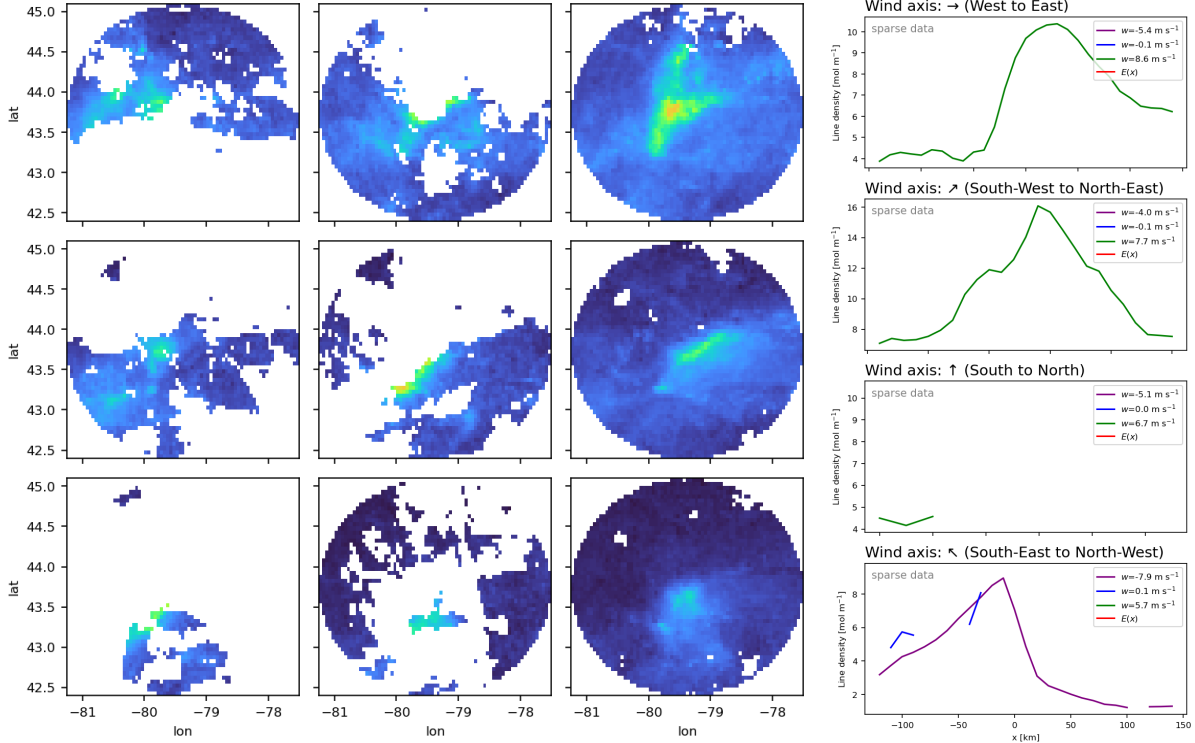

## 27.3 Summer

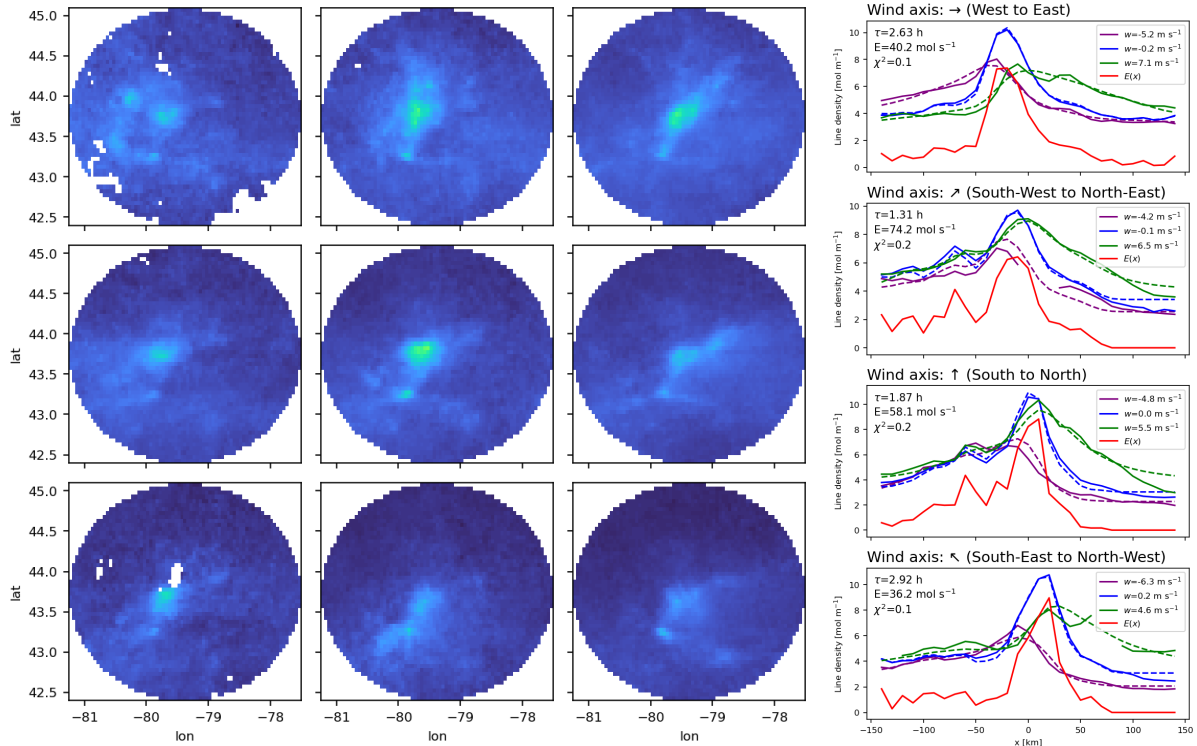

## 27.4 Autumn

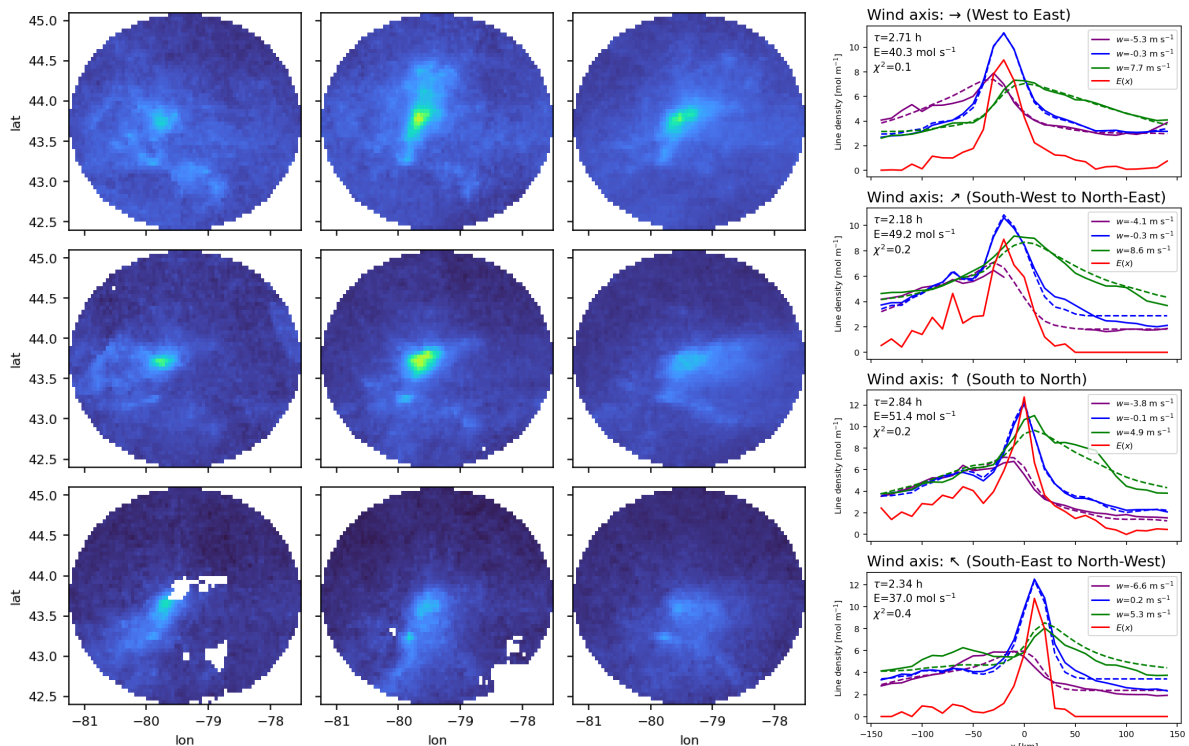



28.1 Winter

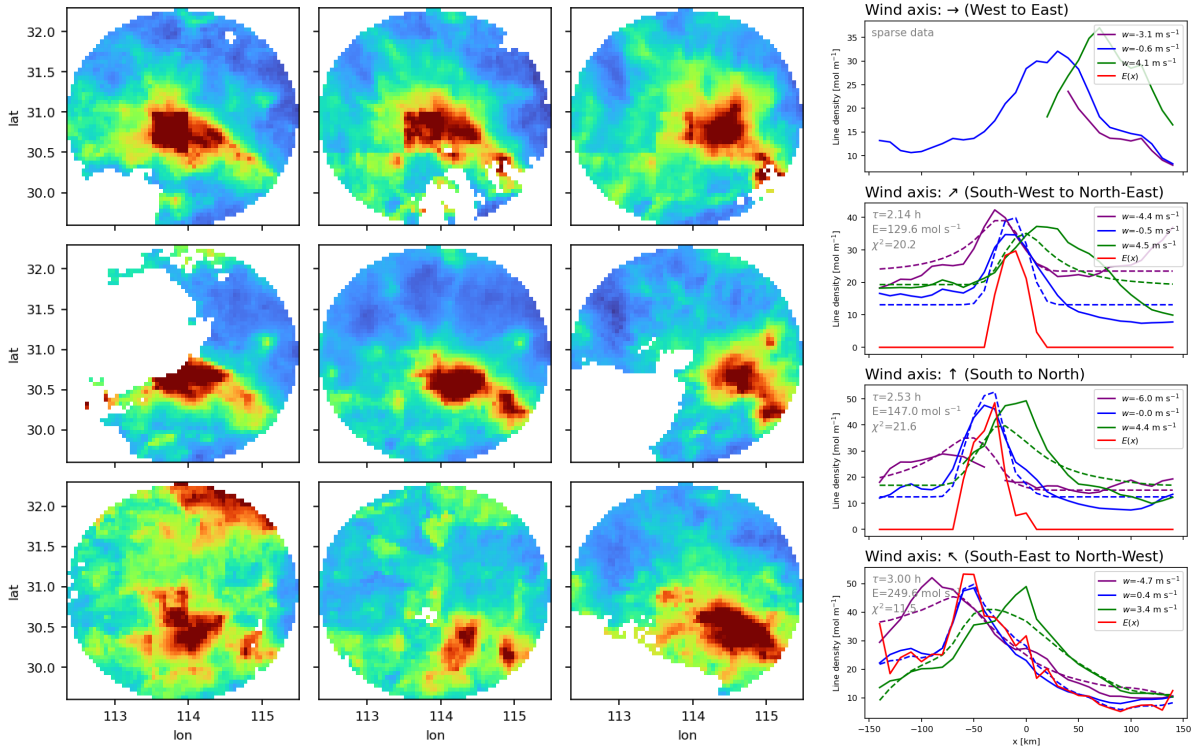

28.2 Spring

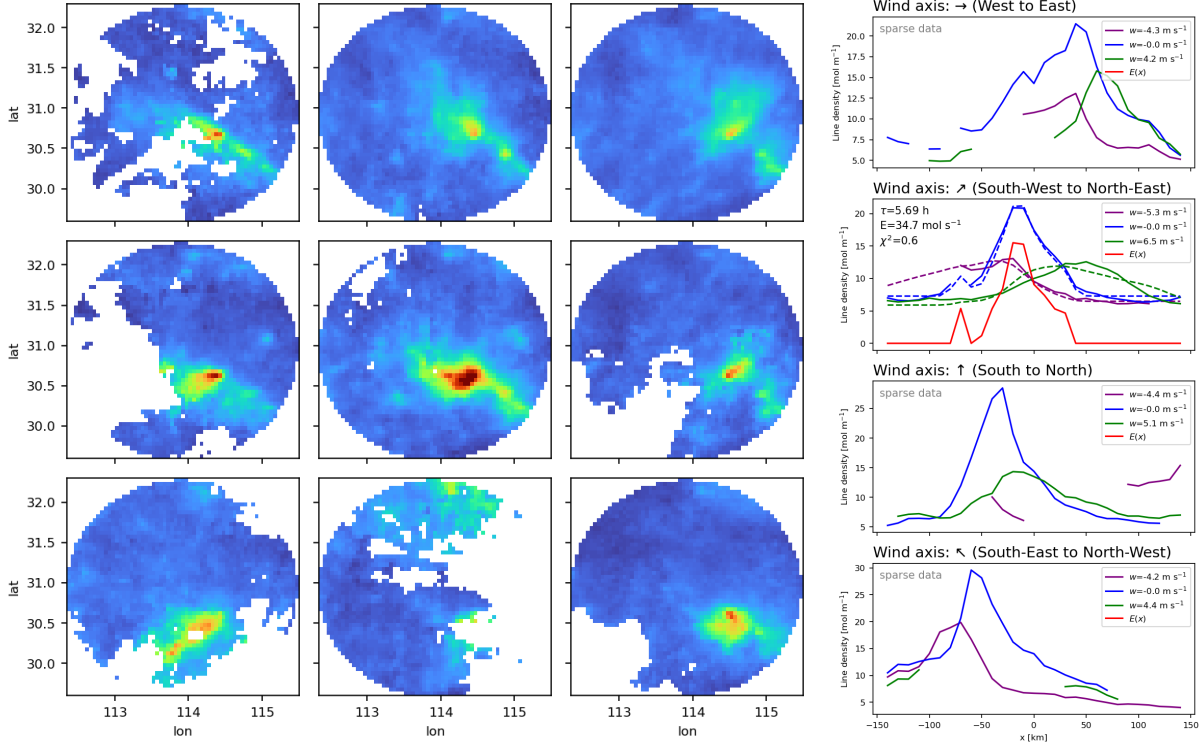

## 28.3 Summer

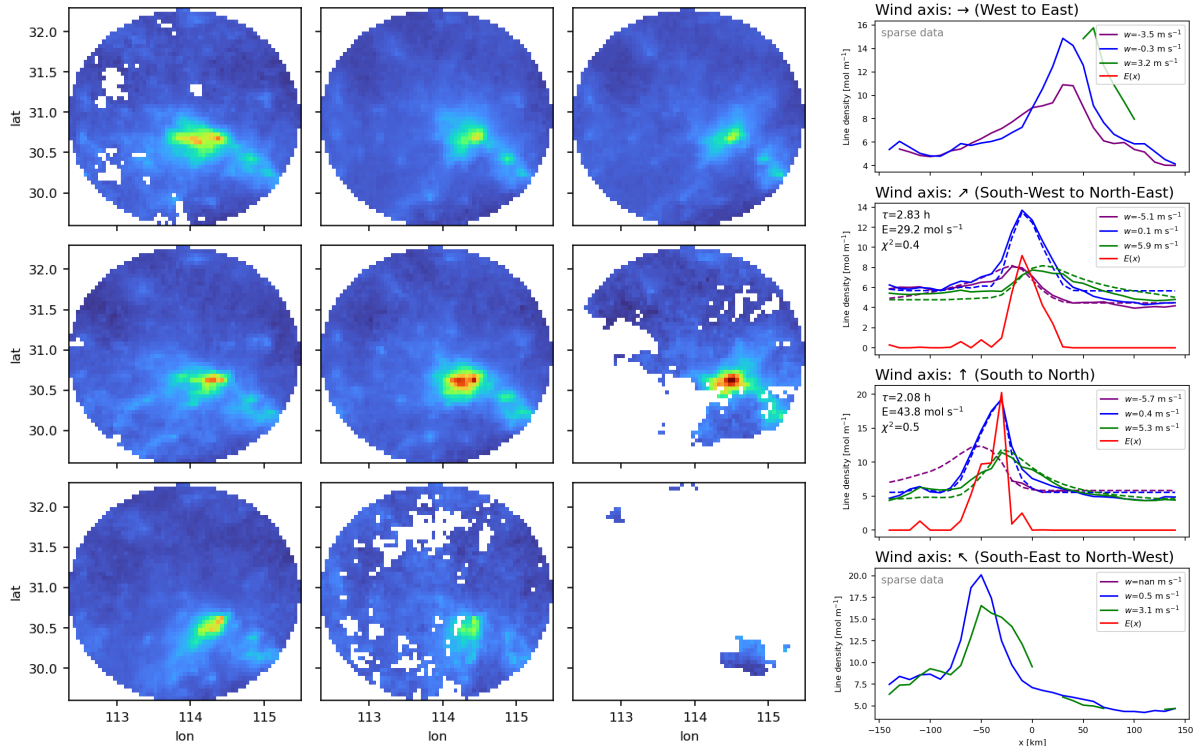

## 28.4 Autumn

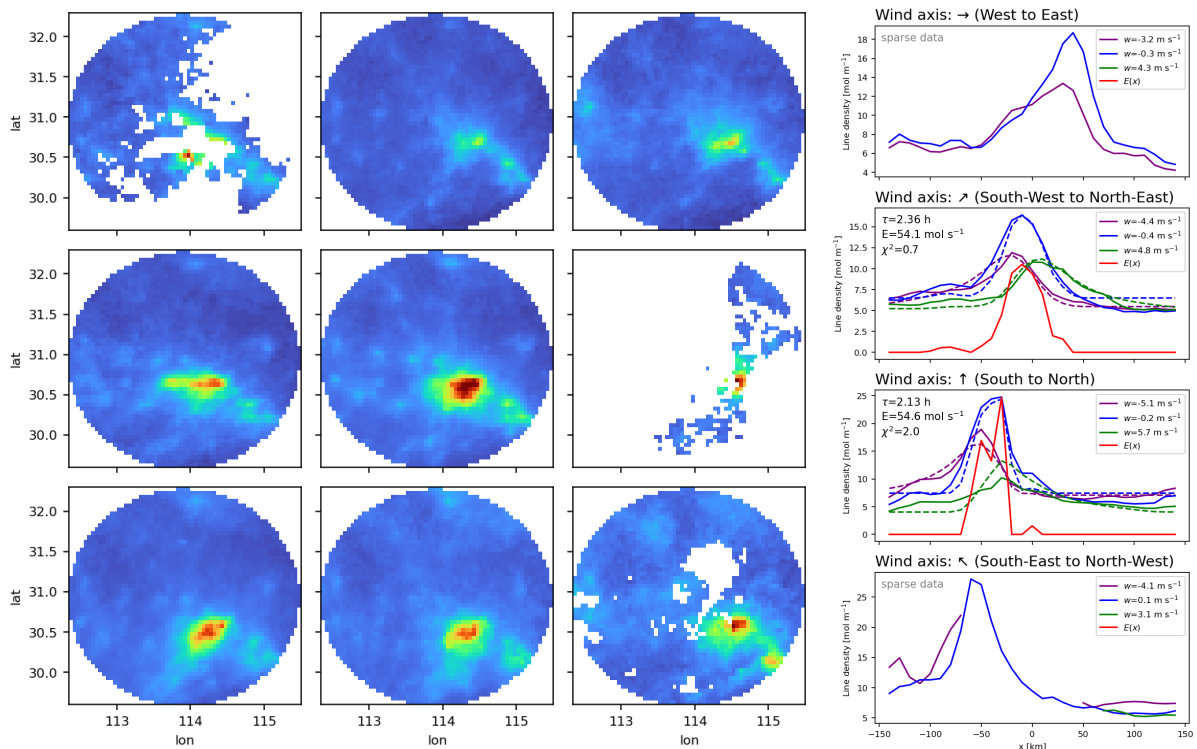

29.1 Winter

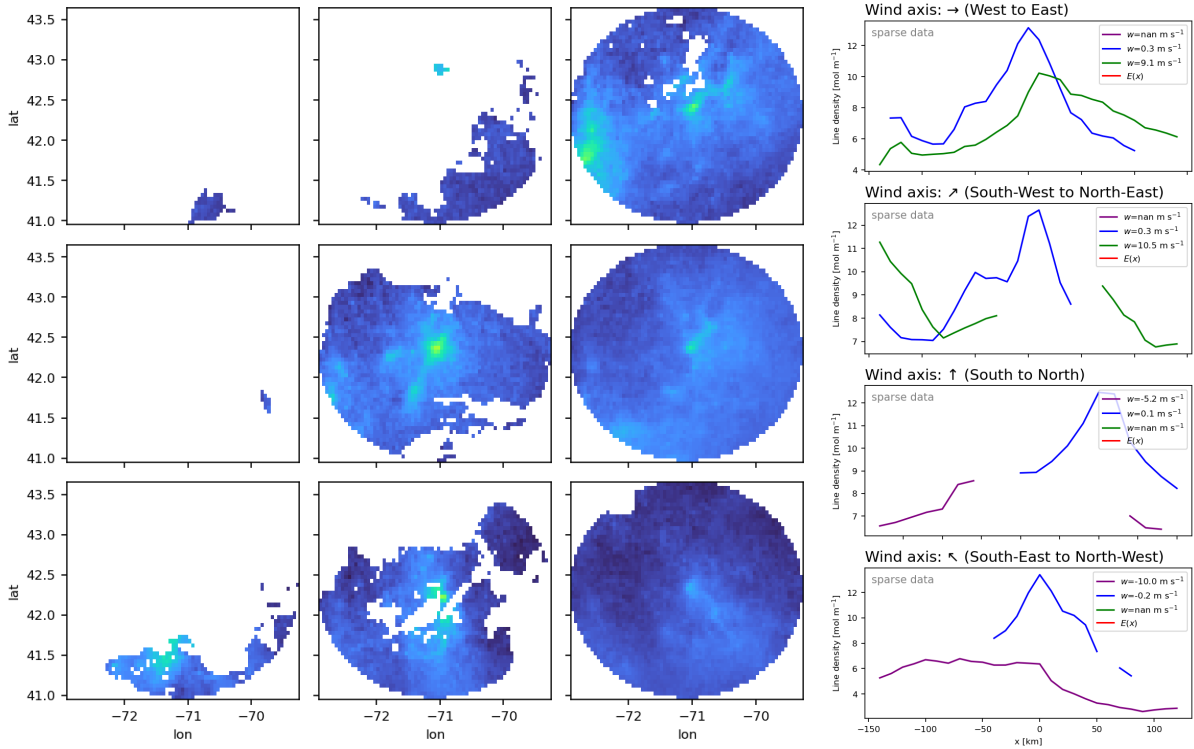

29.2 Spring

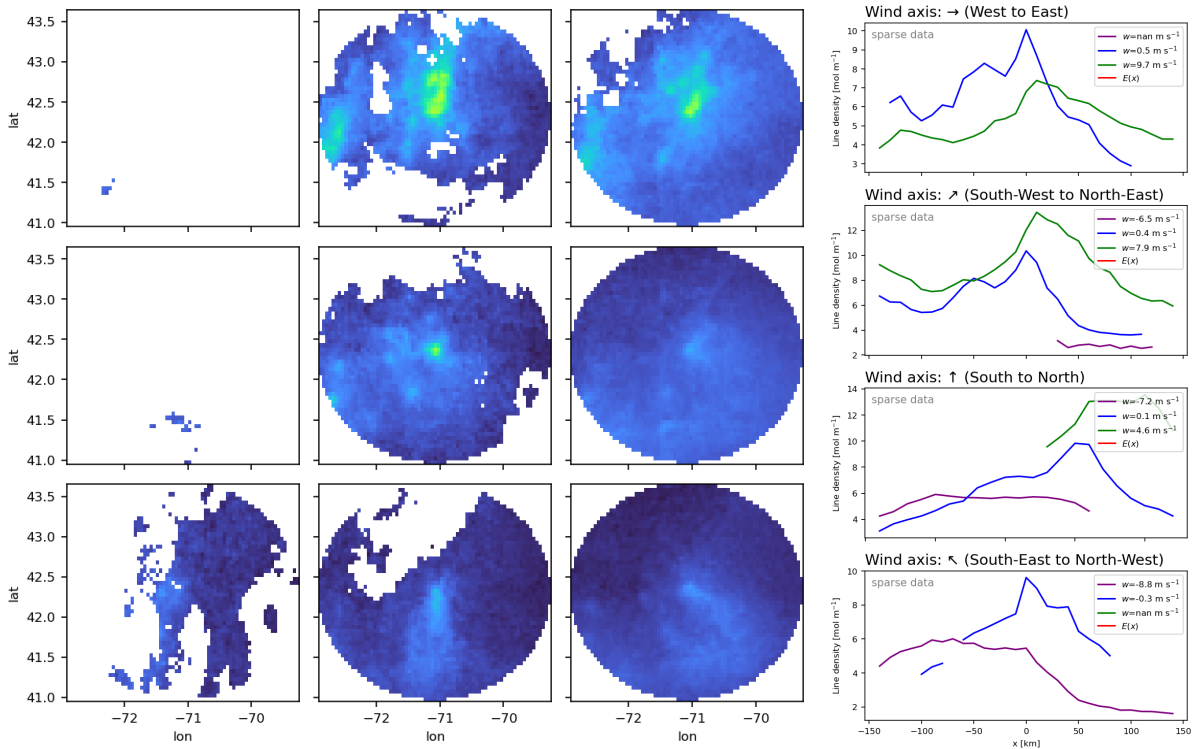

## 29.3 Summer

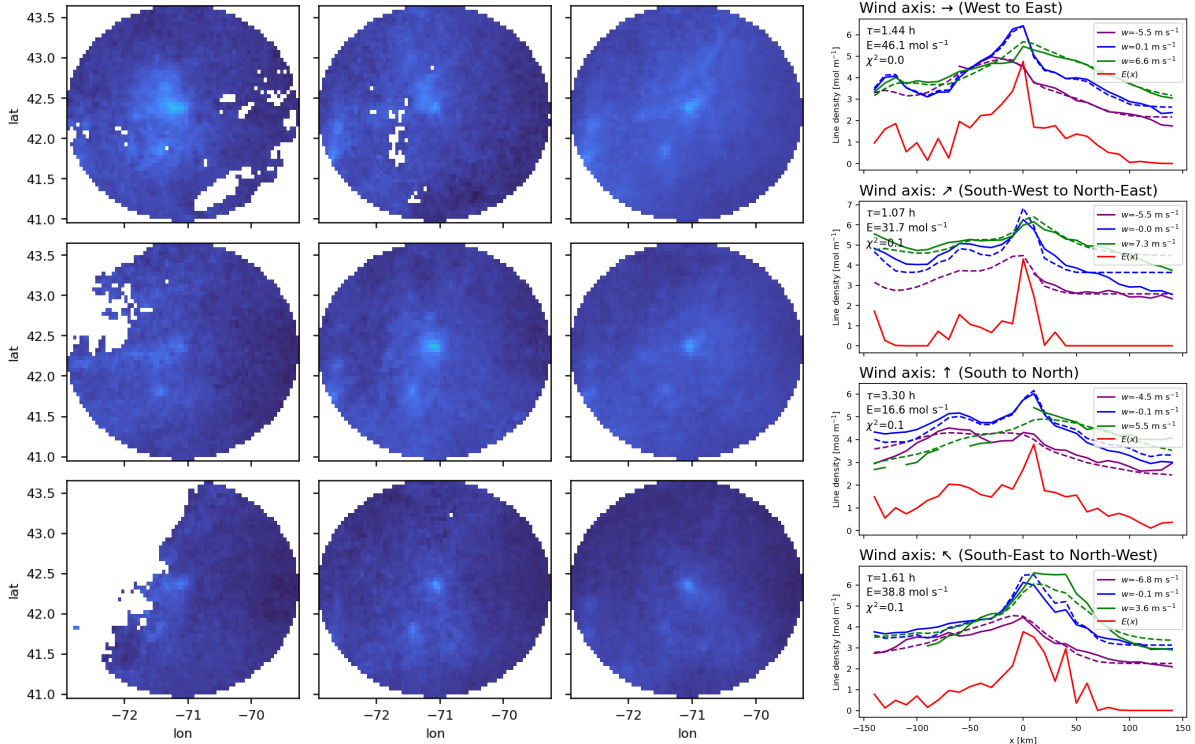

## 29.4 Autumn

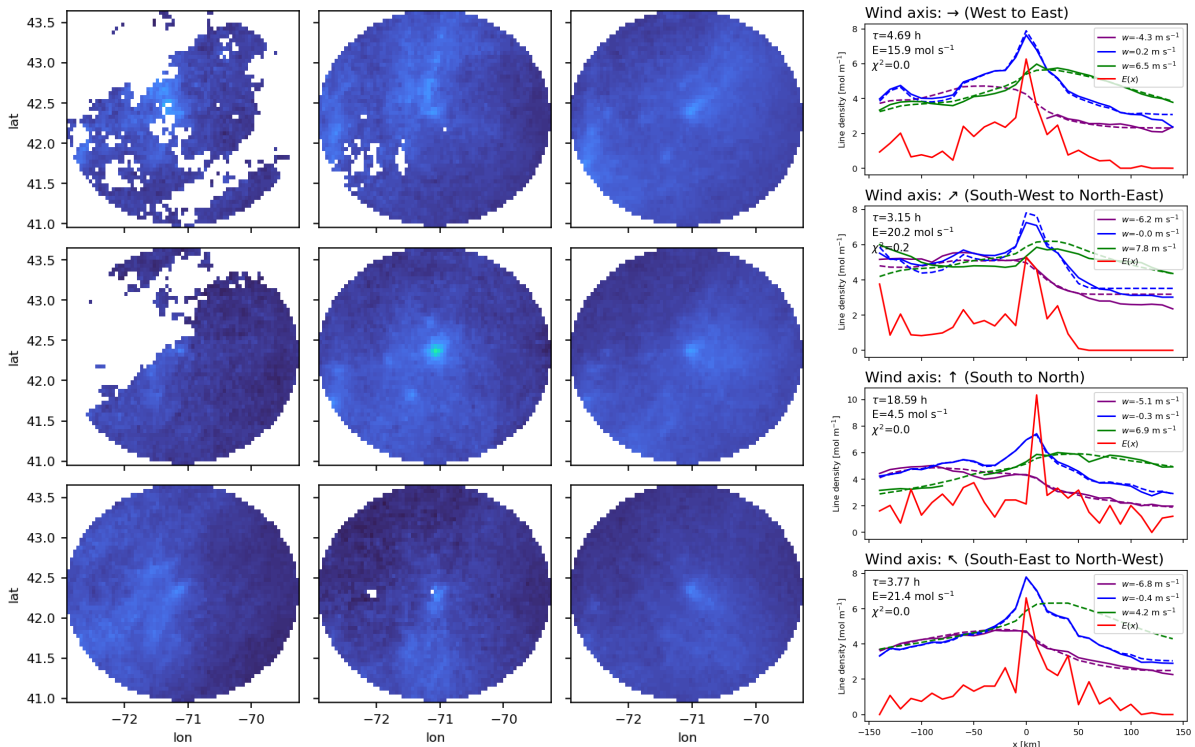

## 30 Harbin

### 30.1 Winter

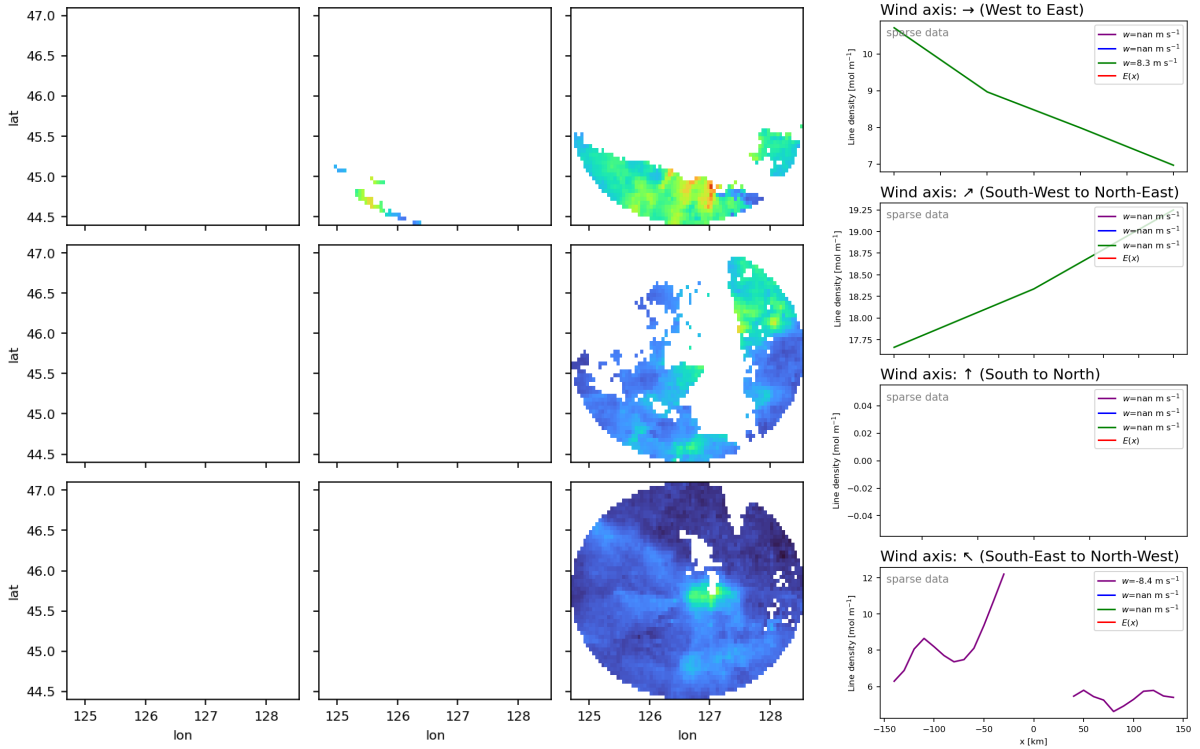

### 30.2 Spring

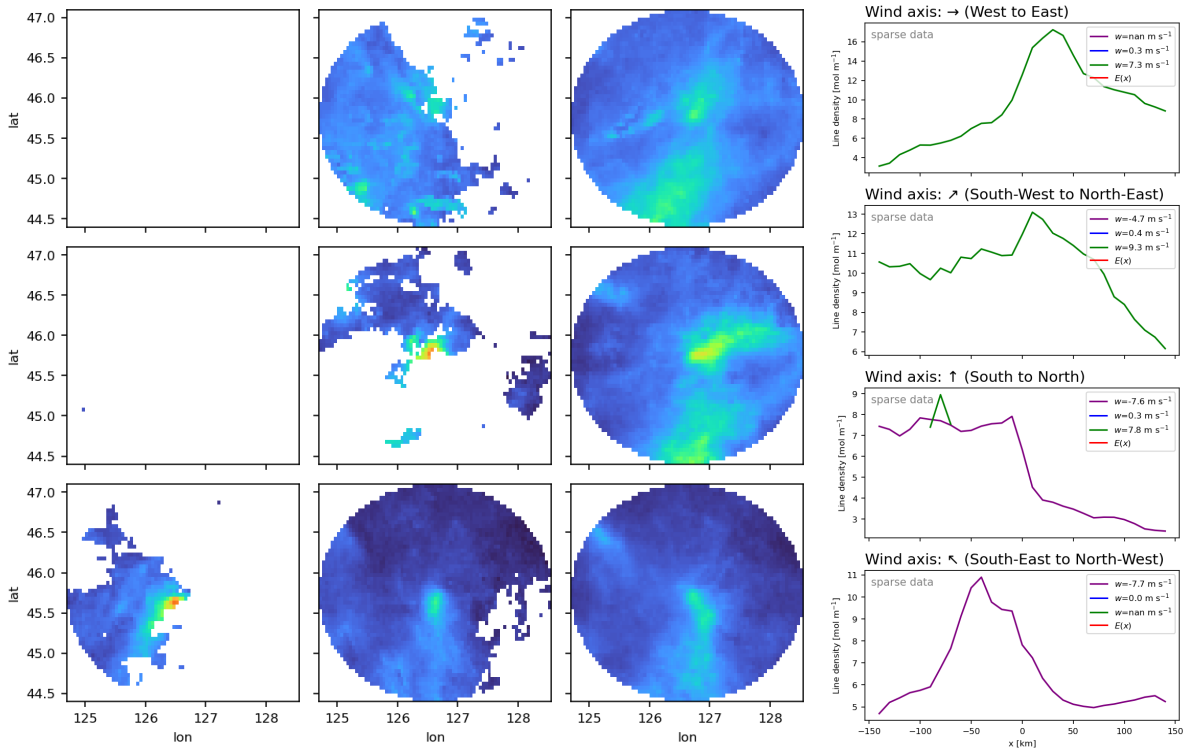

### 30.3 Summer

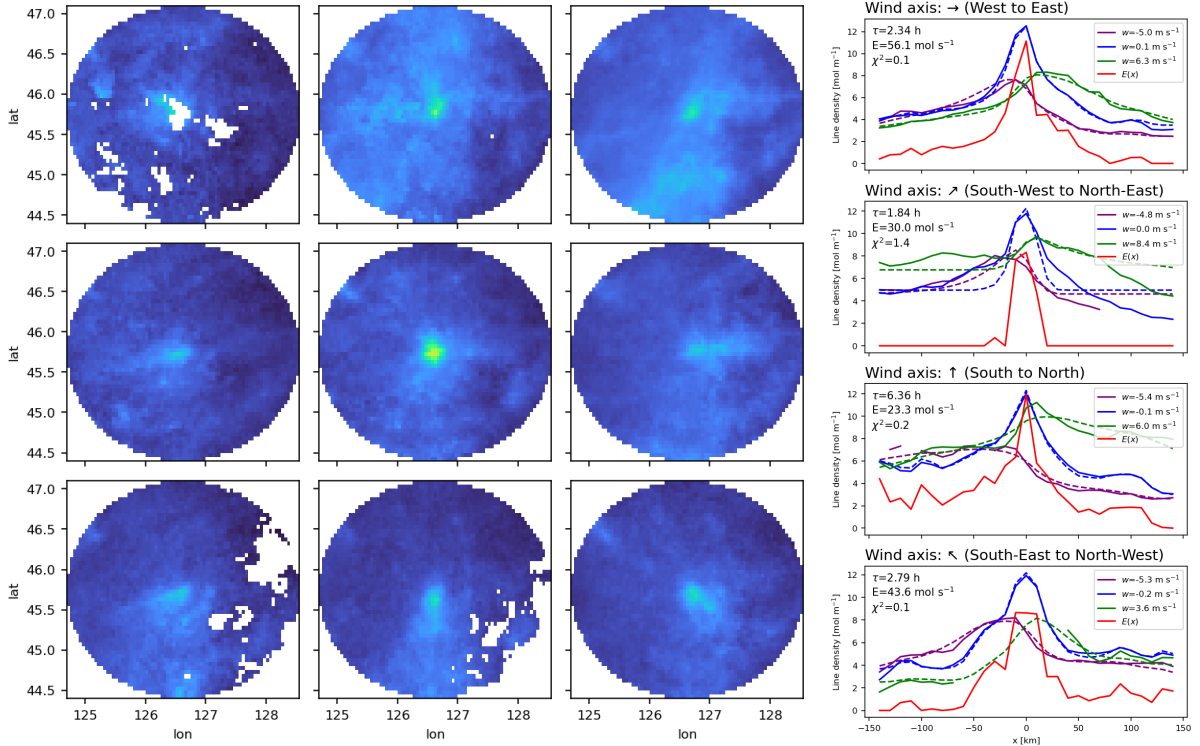

### 30.4 Autumn

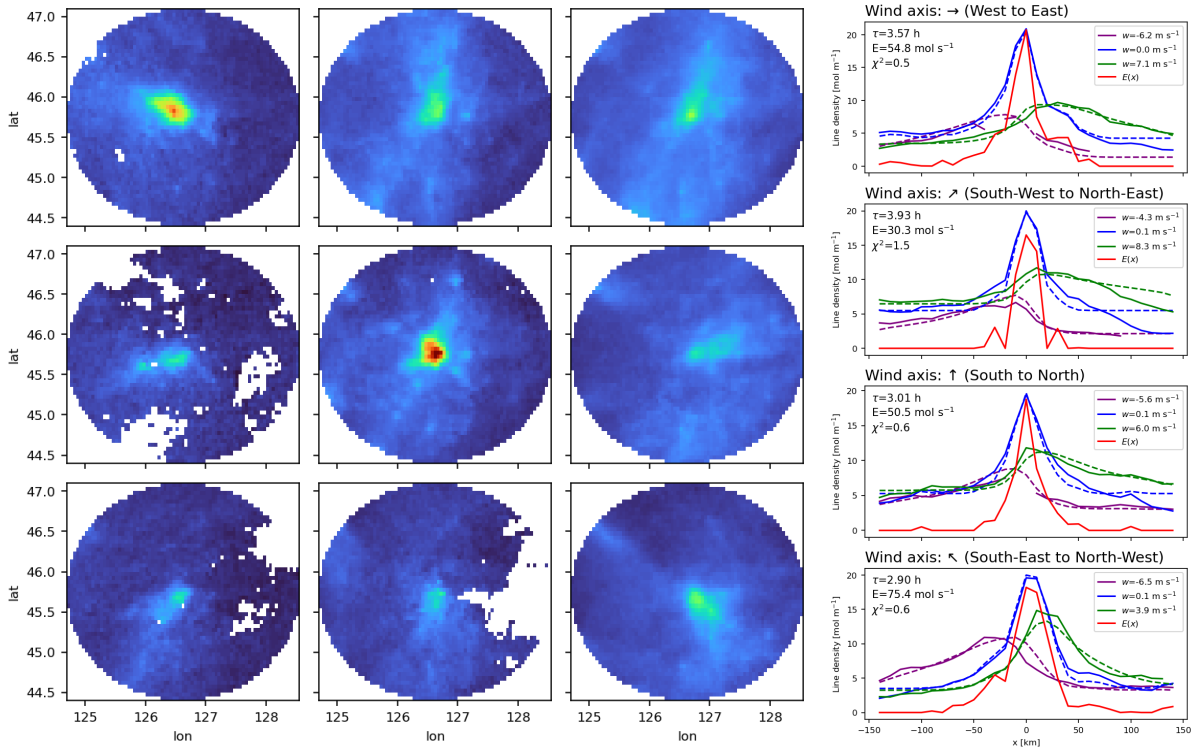

## 31 Melbourne

### 31.1 Winter

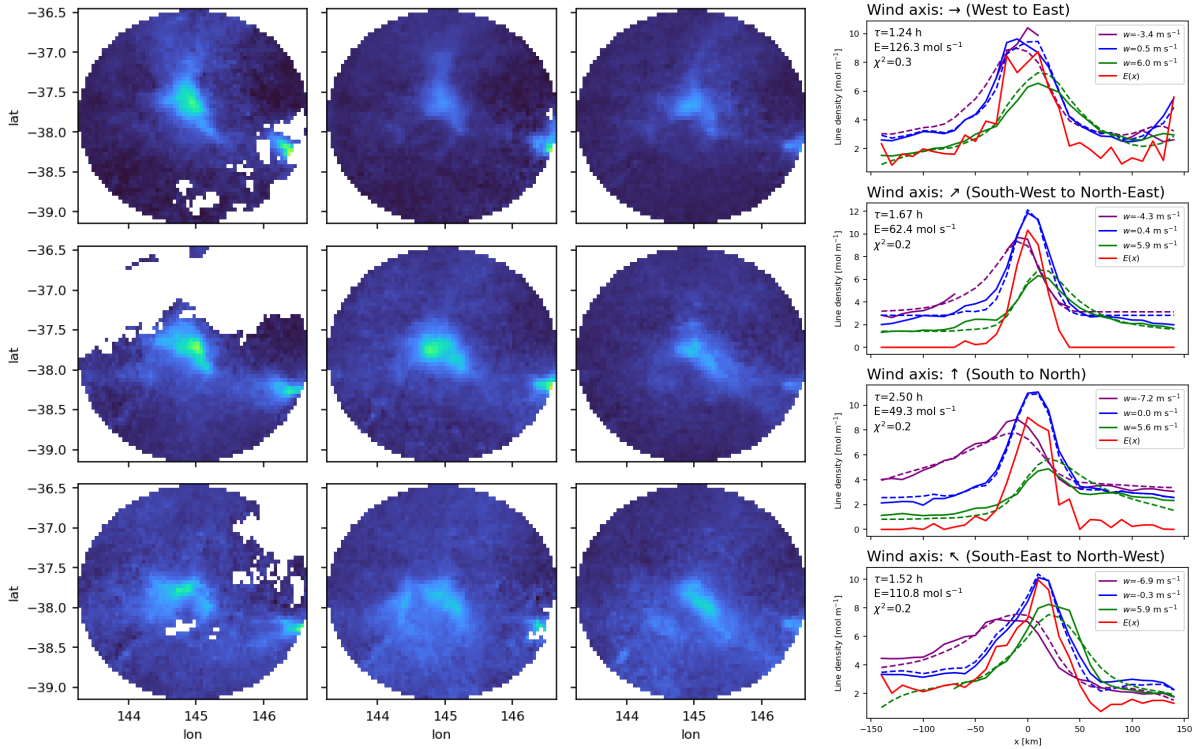

### 31.2 Spring

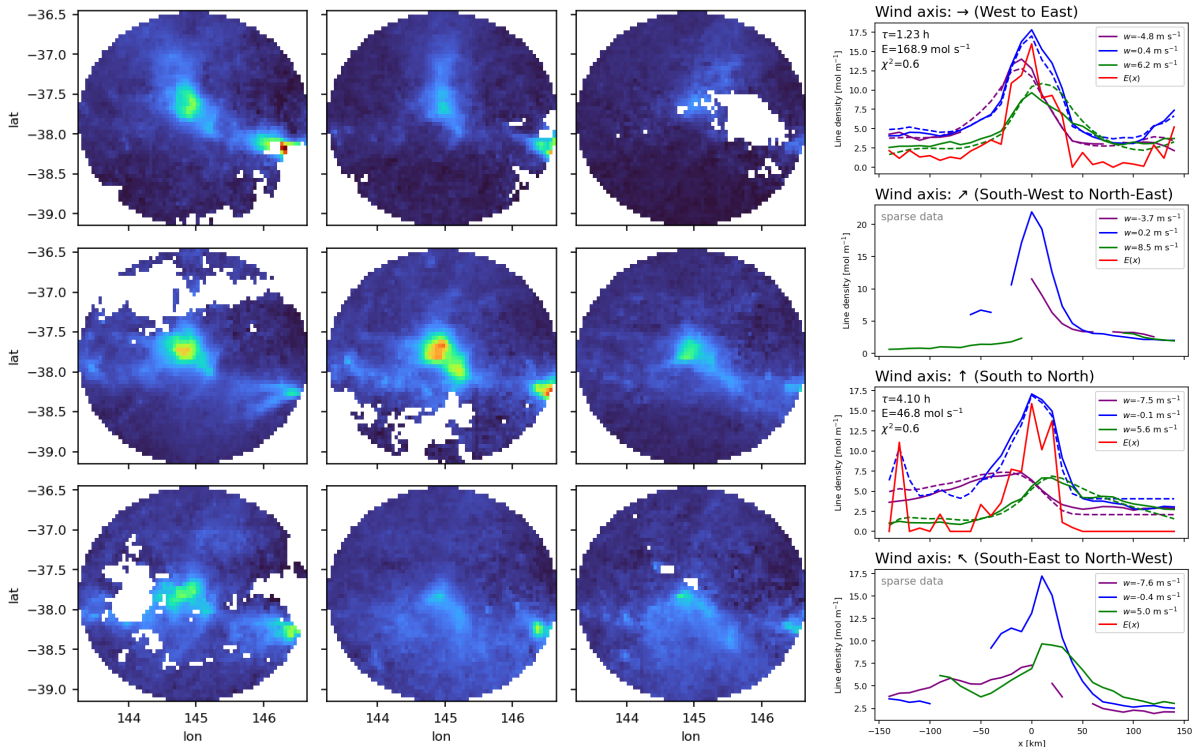

### 31.3 Summer

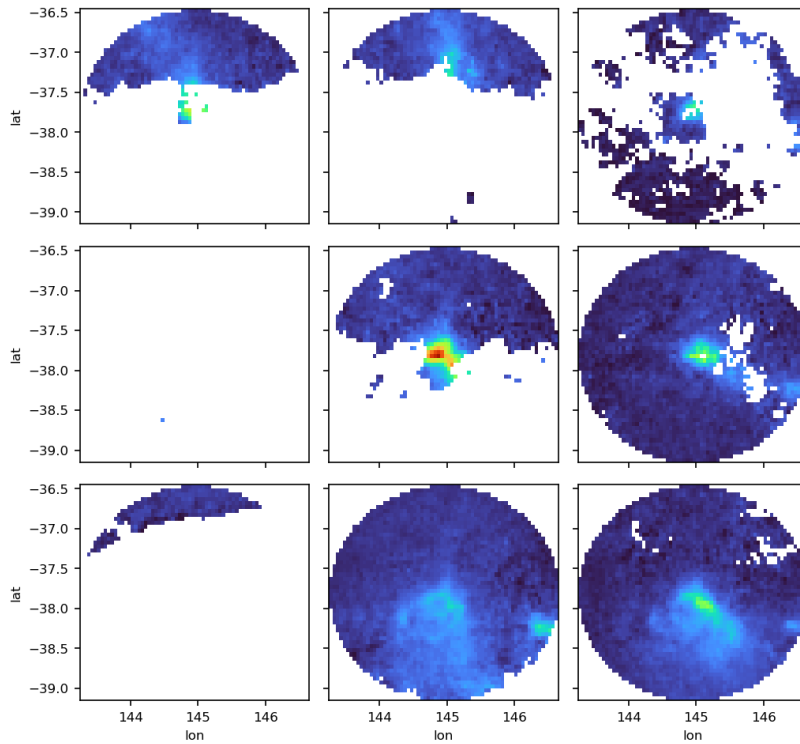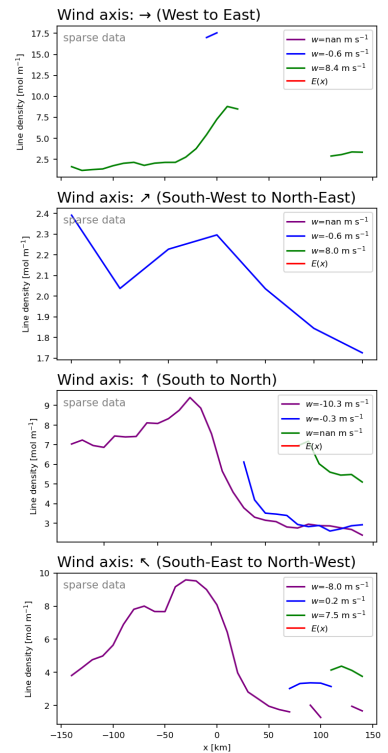

### 31.4 Autumn

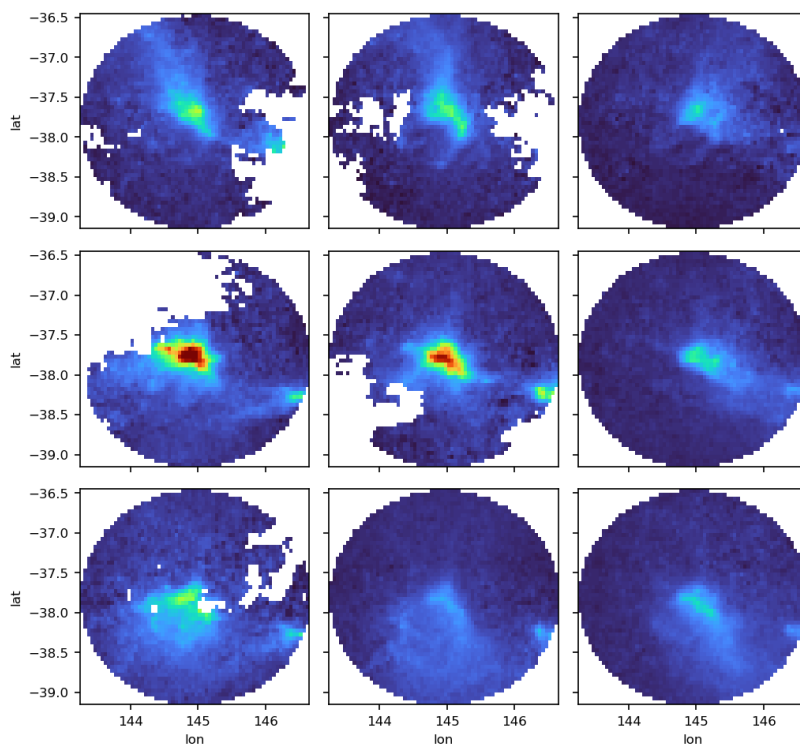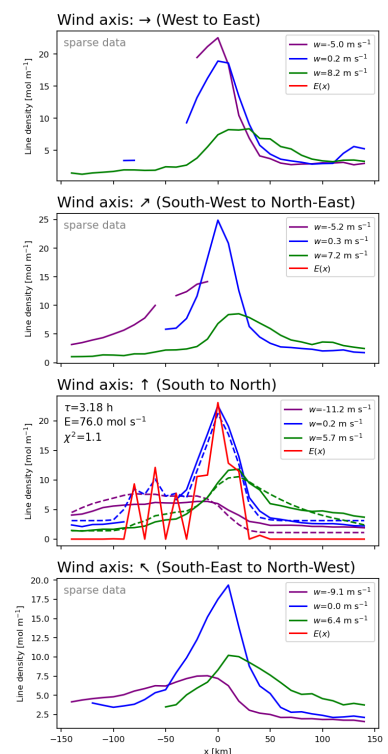



32.1 Winter

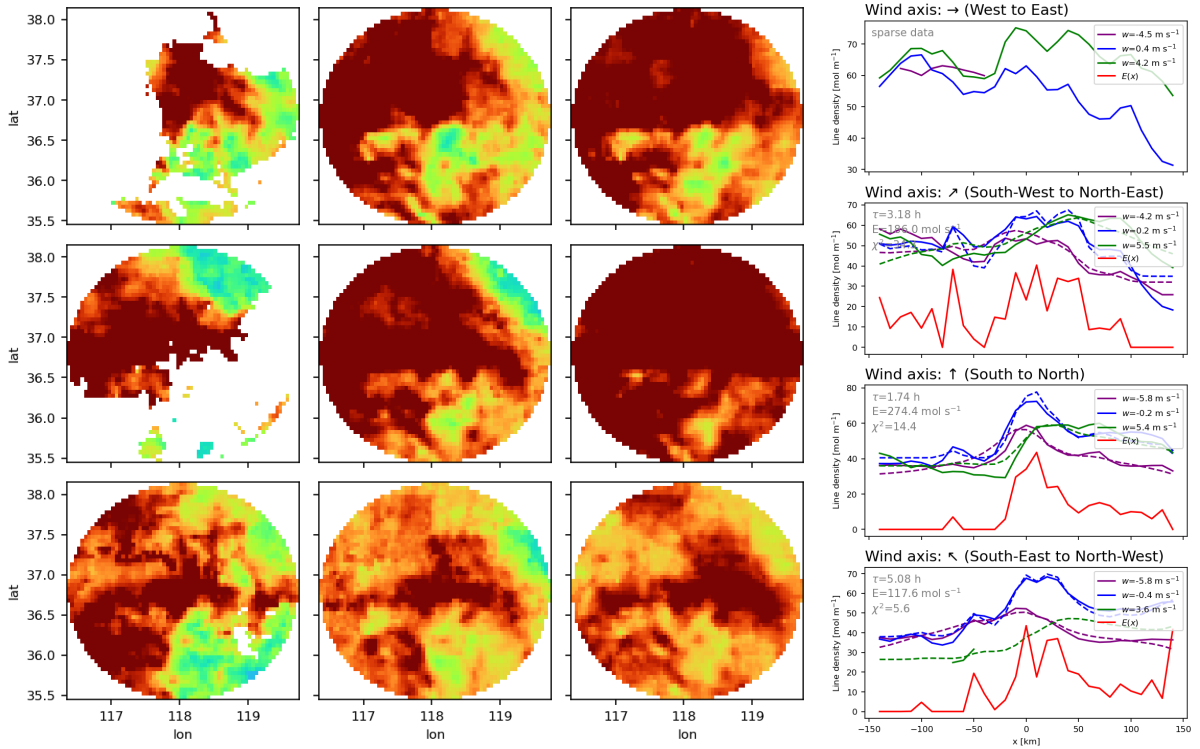

32.2 Spring

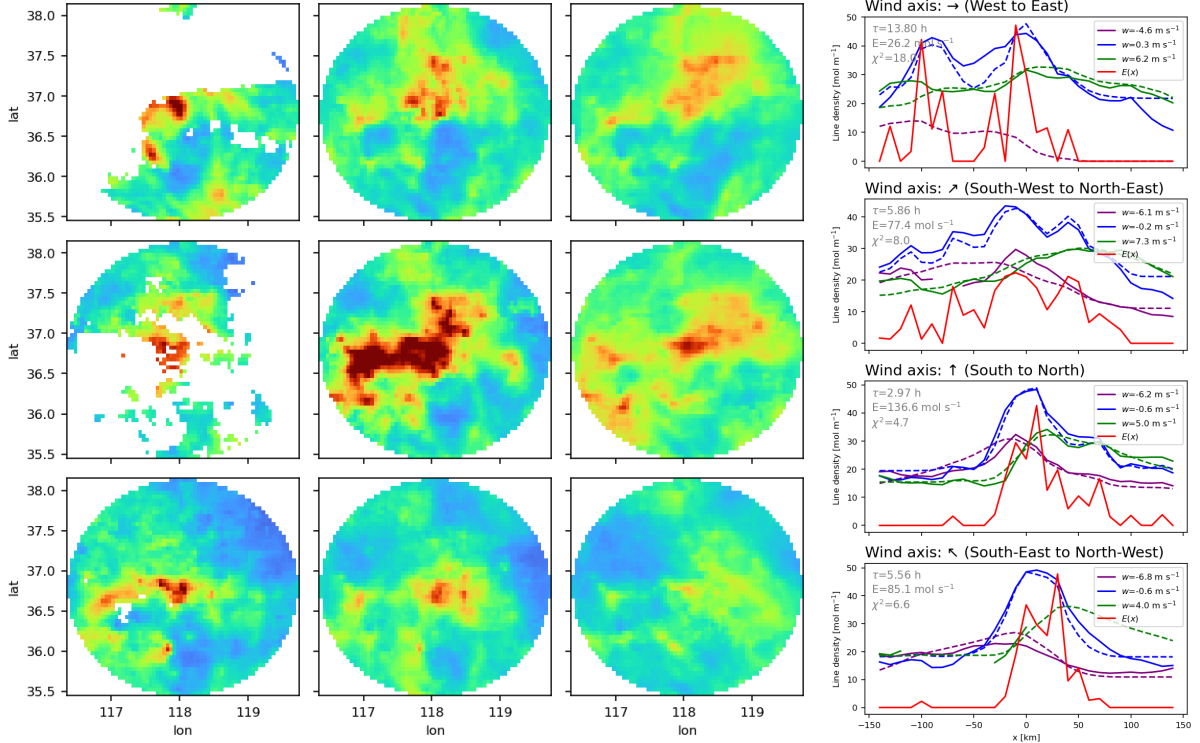

### 32.3 Summer

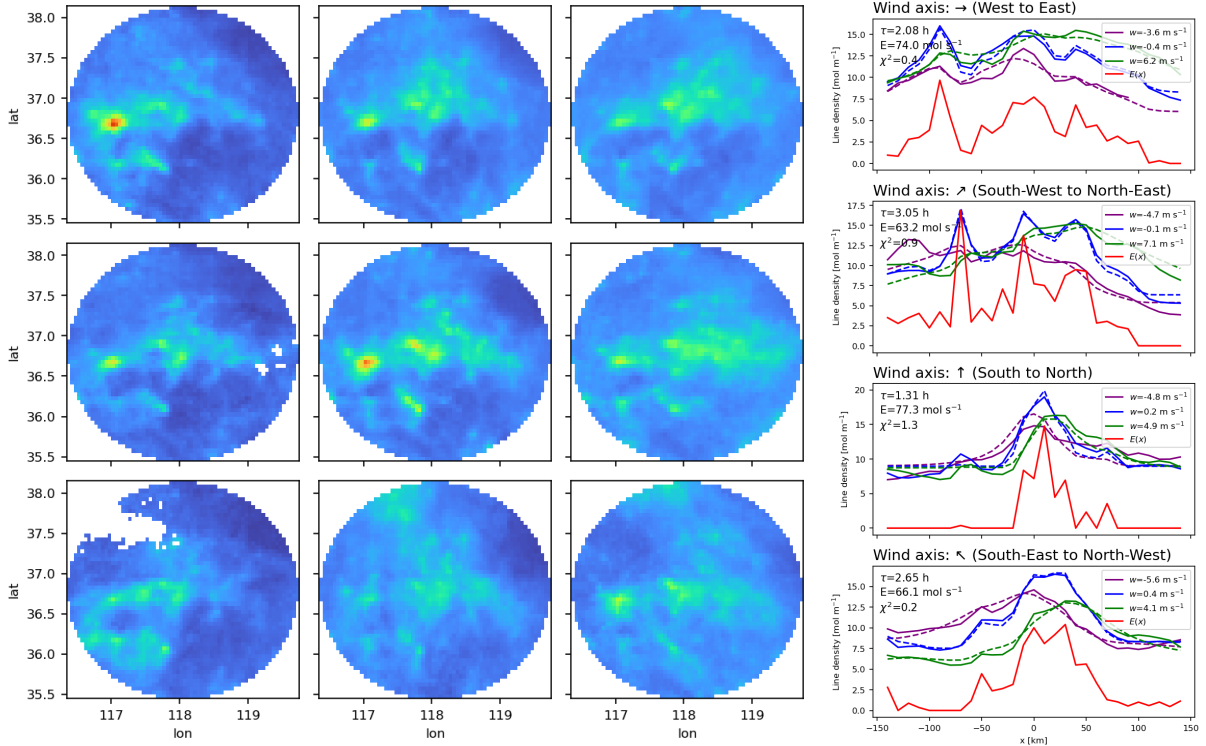

### 32.4 Autumn

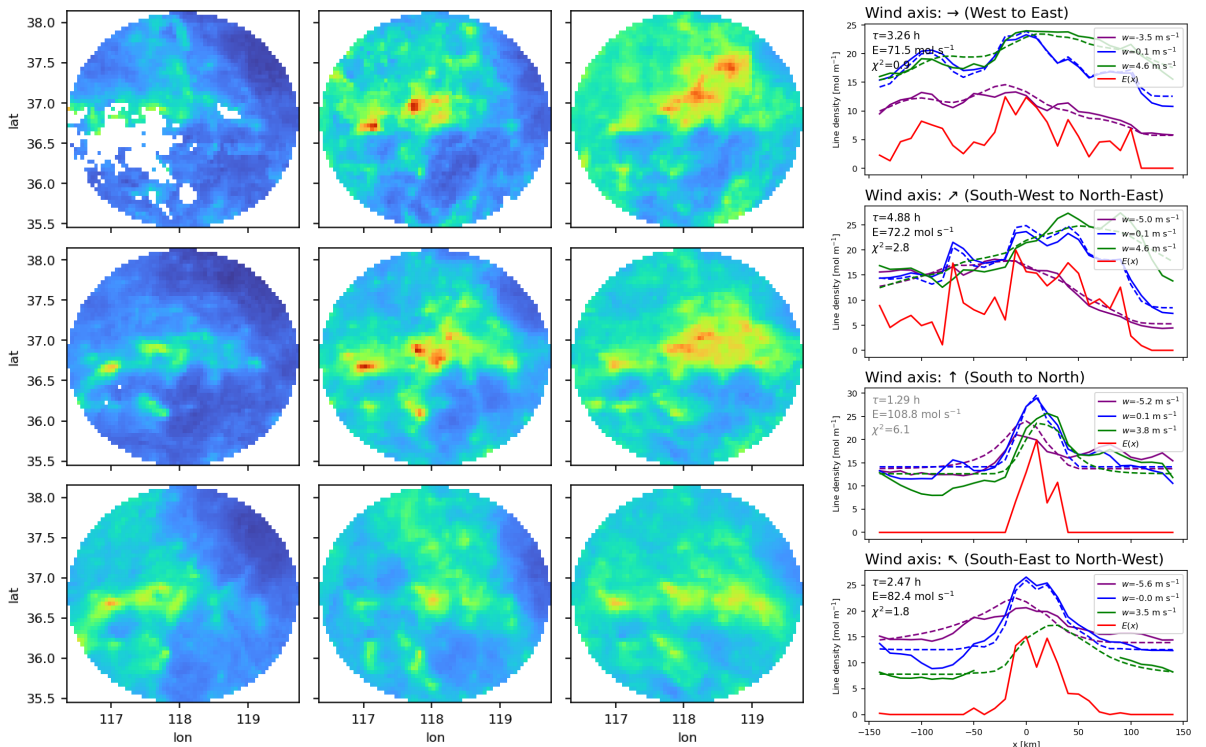

33.1 Winter

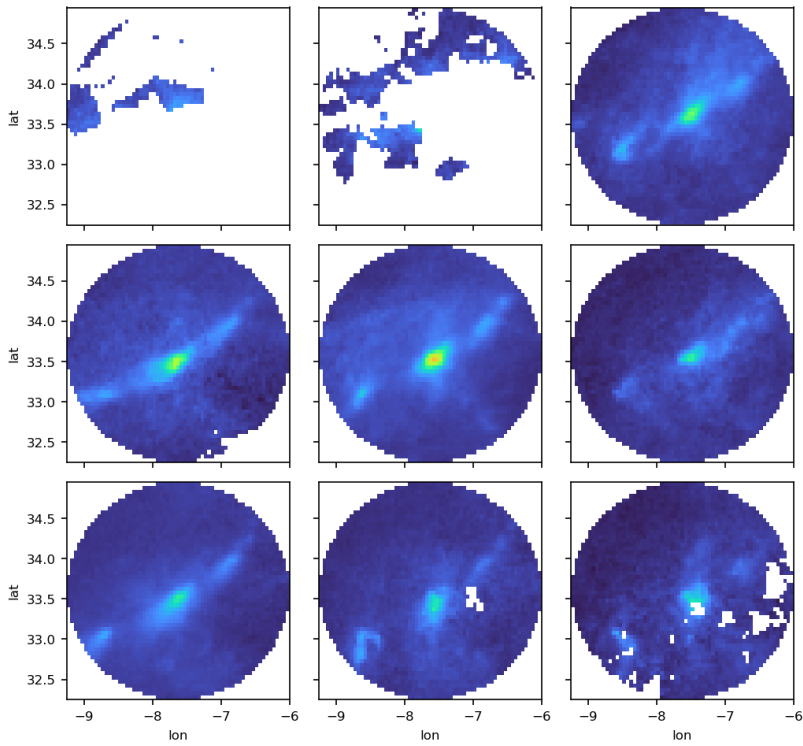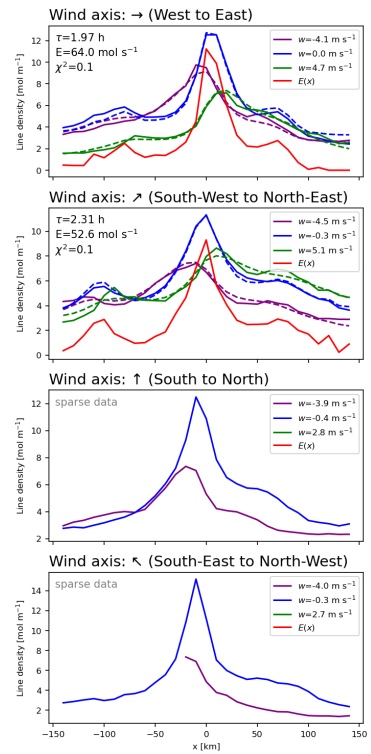

33.2 Spring

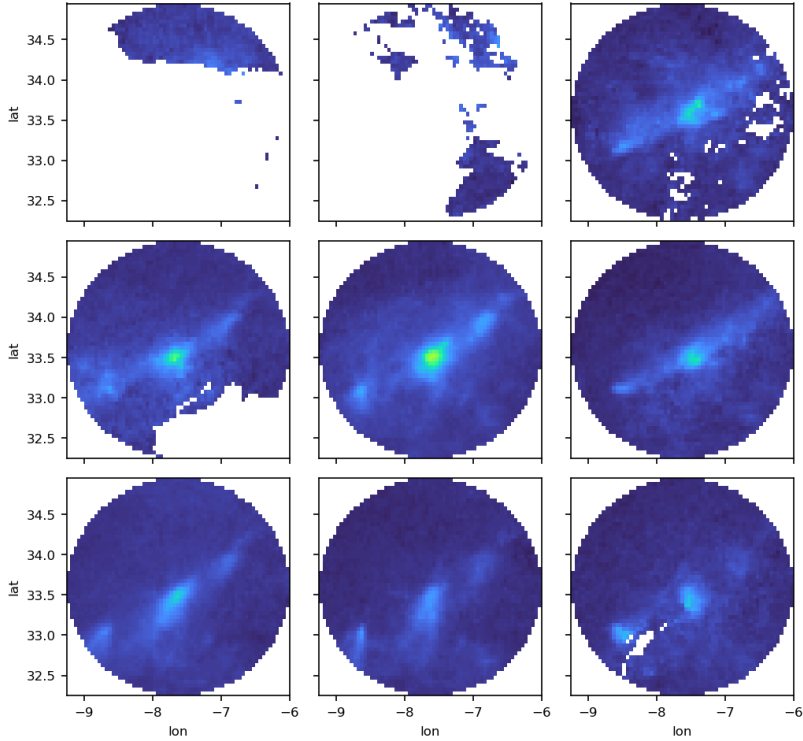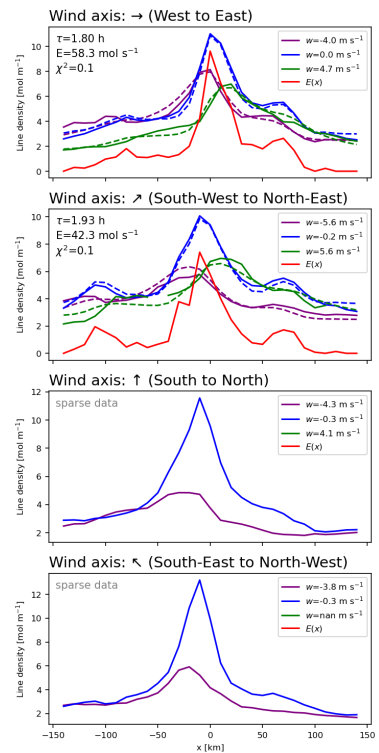

### 33.3 Summer

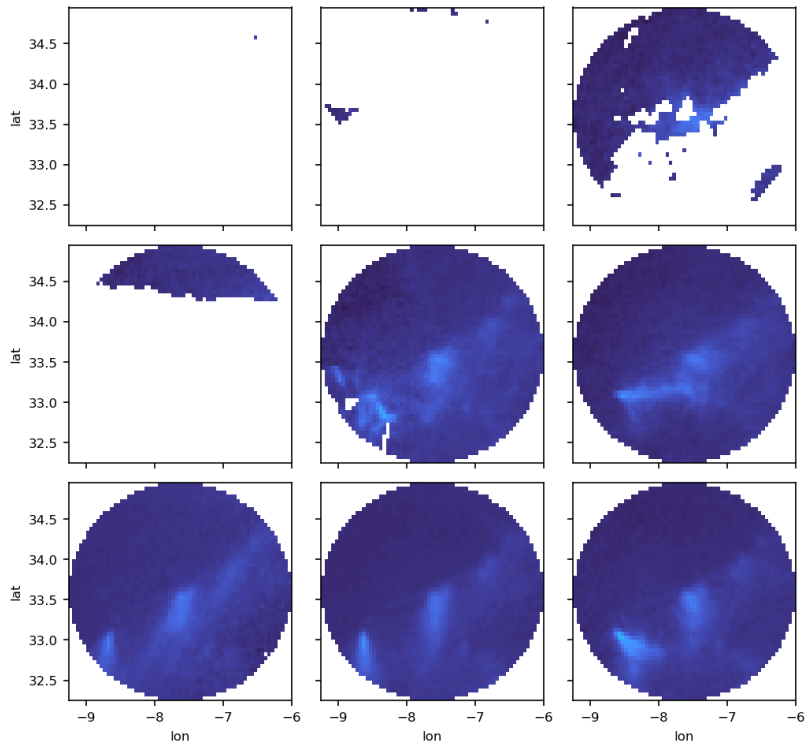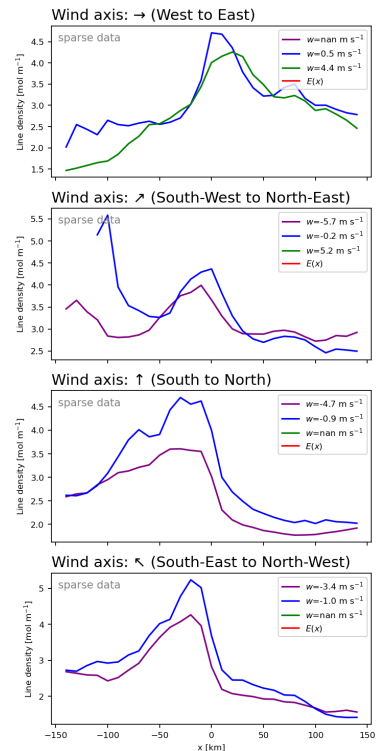

### 33.4 Autumn

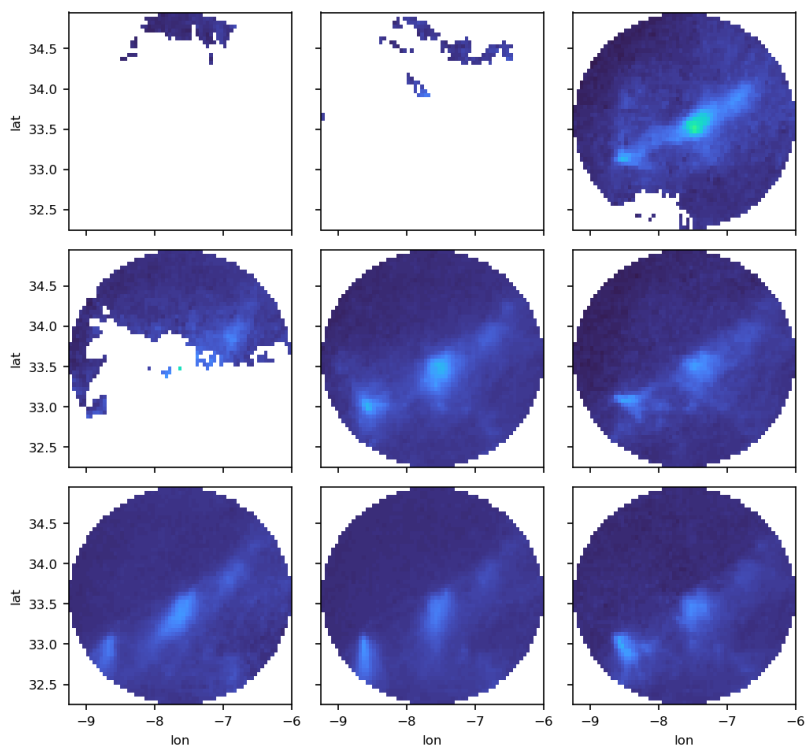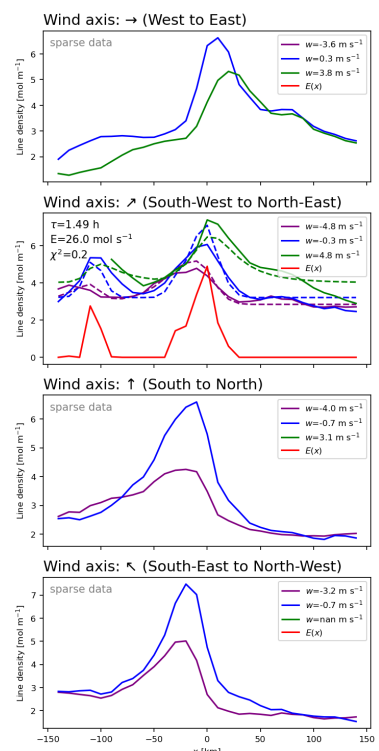

34.1 Winter

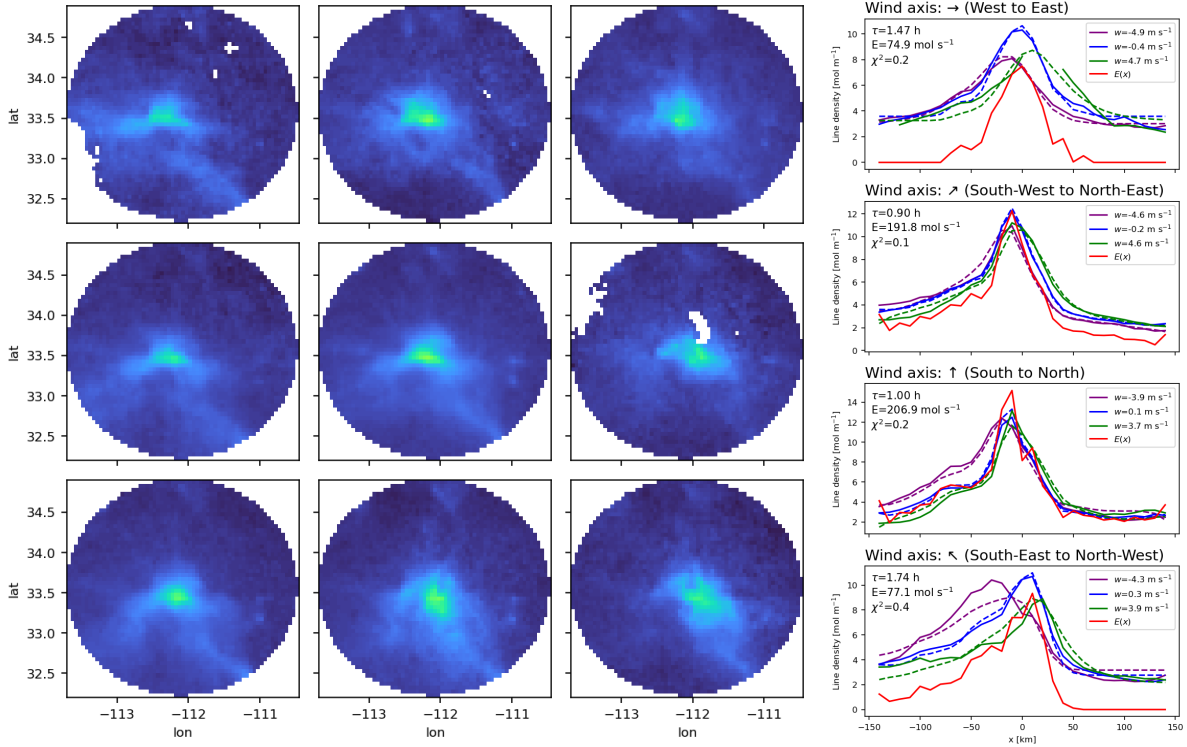

34.2 Spring

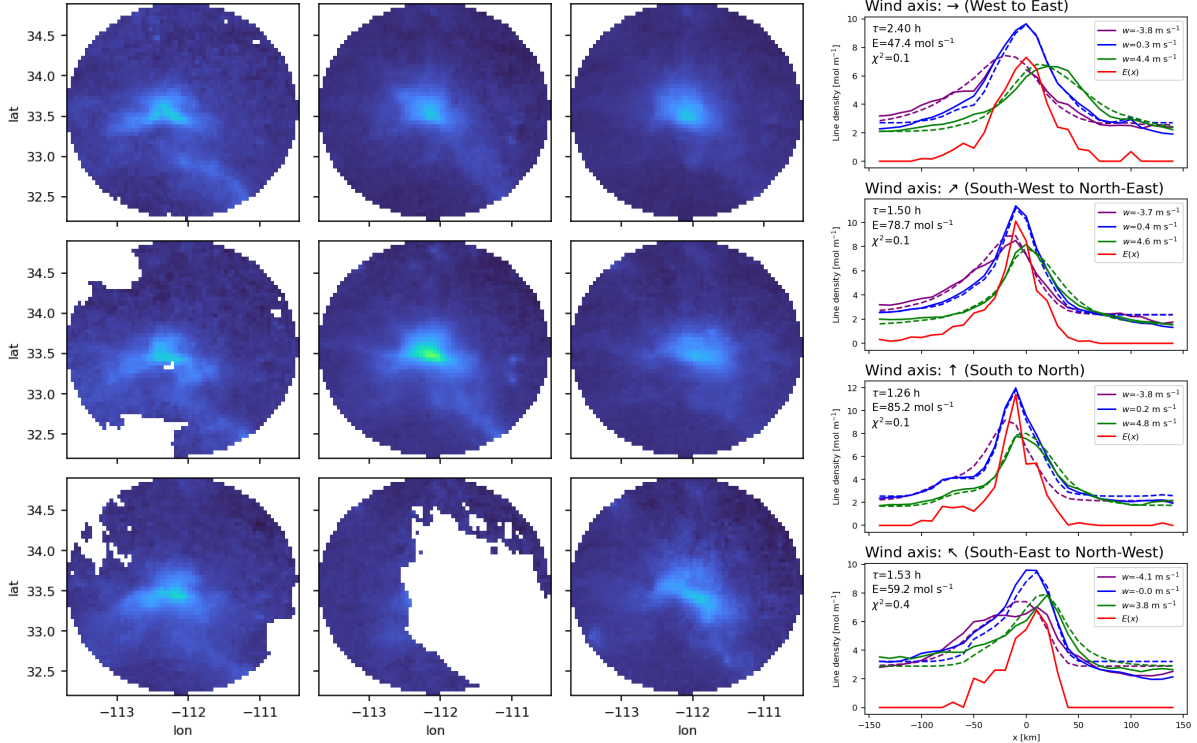

### 34.3 Summer

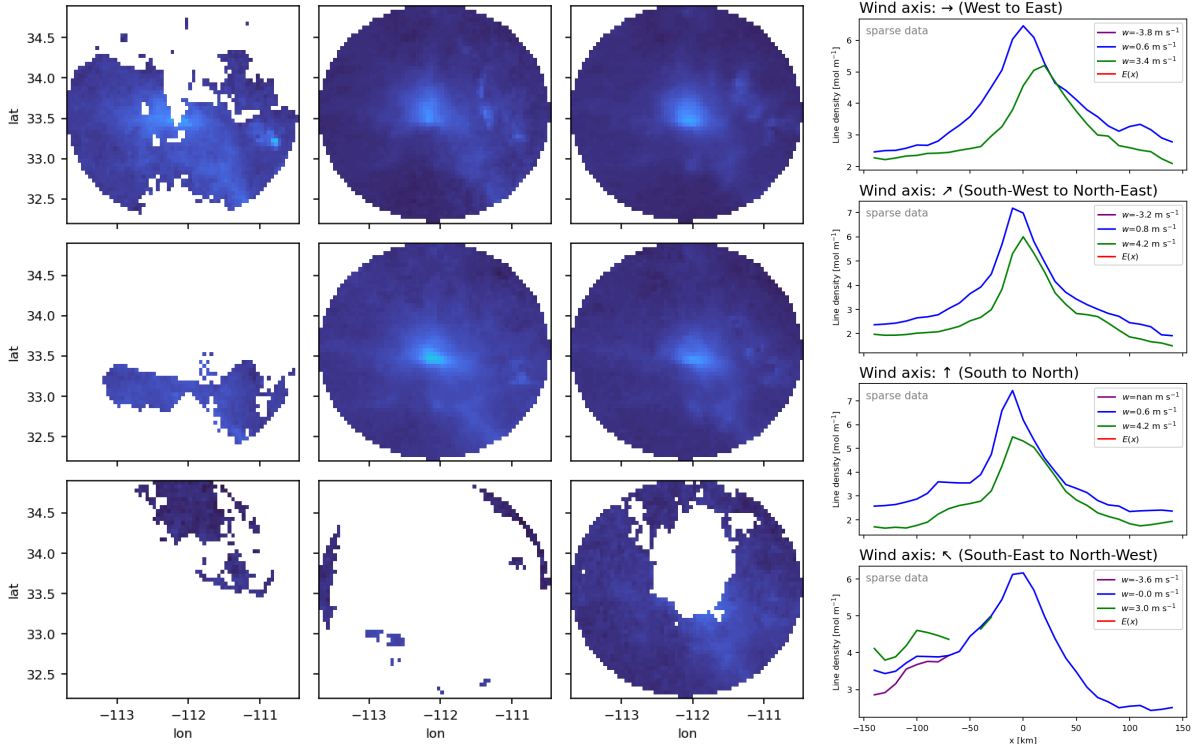

### 34.4 Autumn

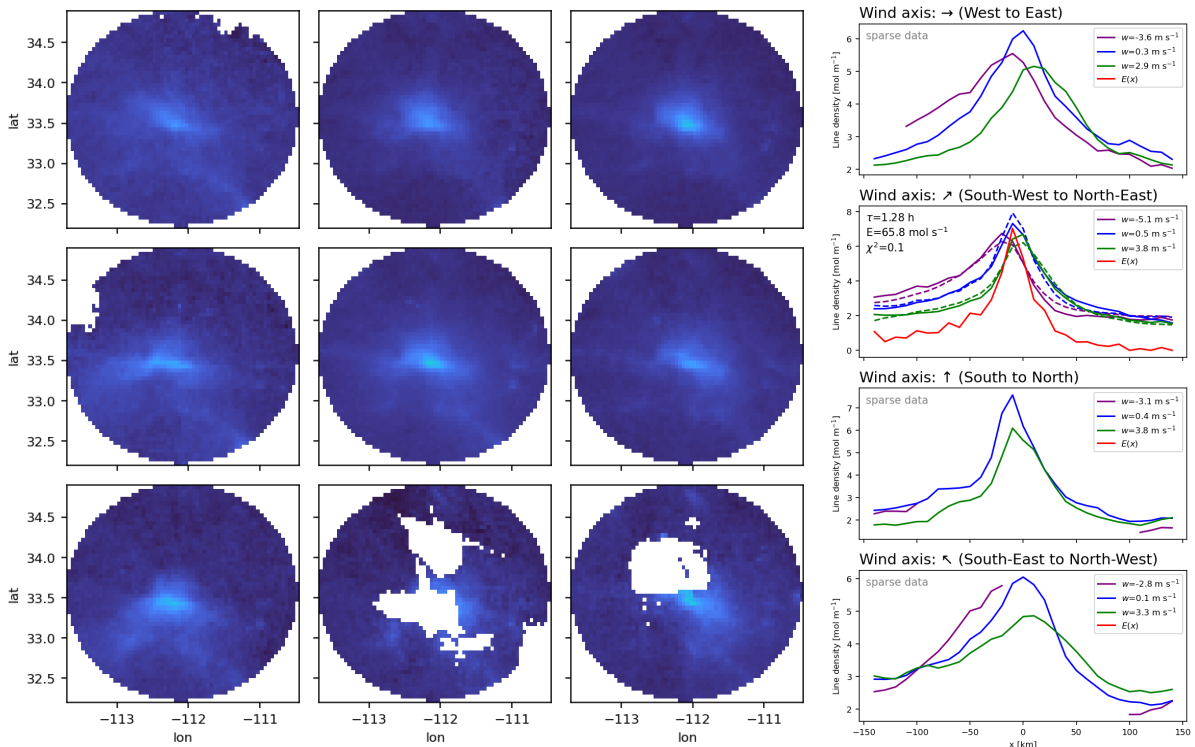

35.1 Winter

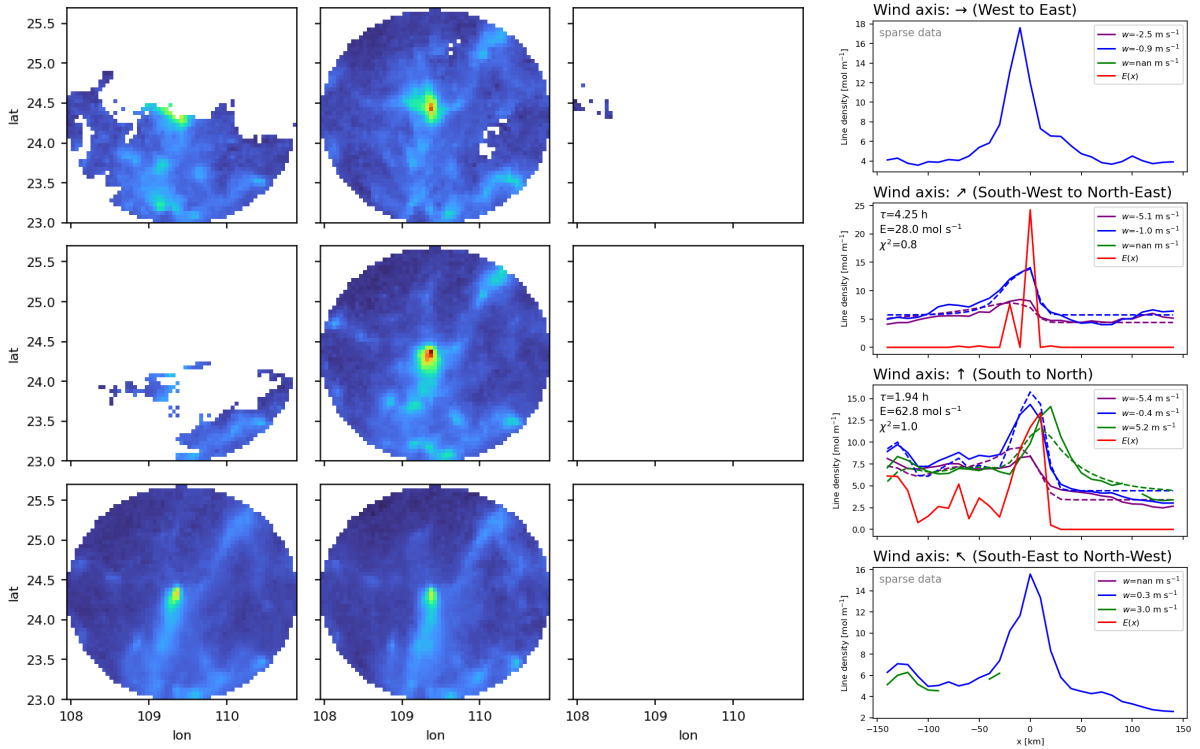

35.2 Spring

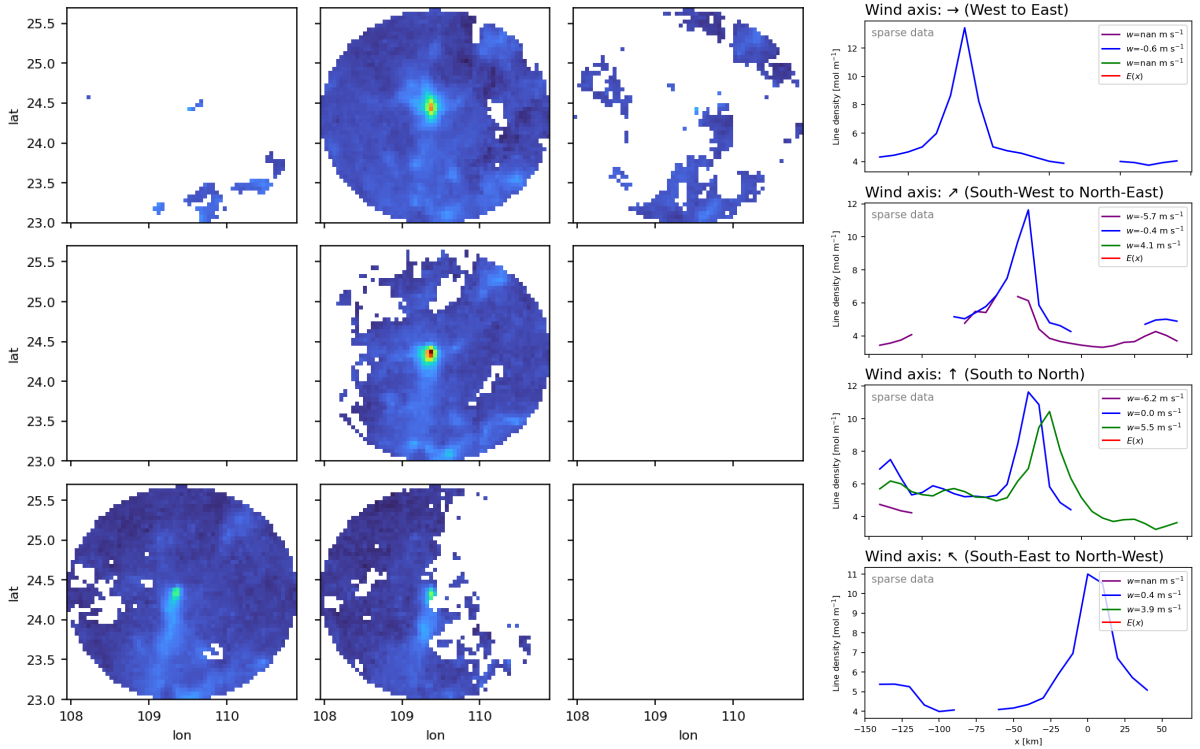

### 35.3 Summer

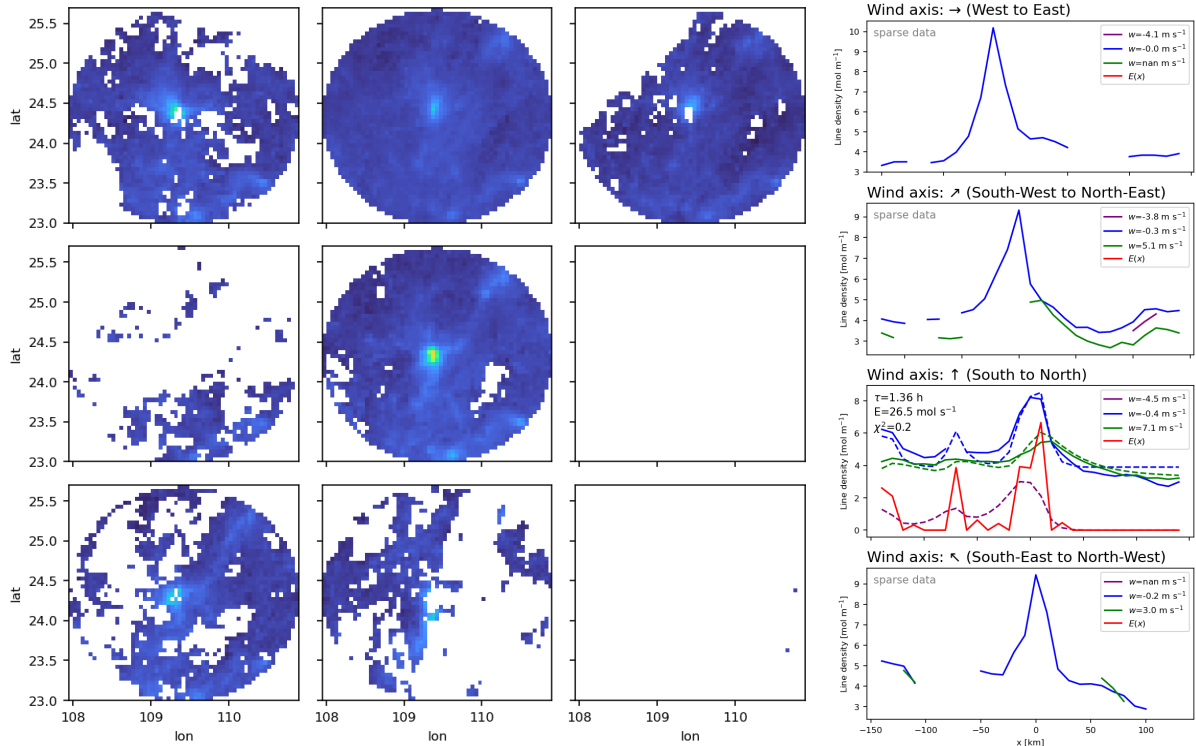

### 35.4 Autumn

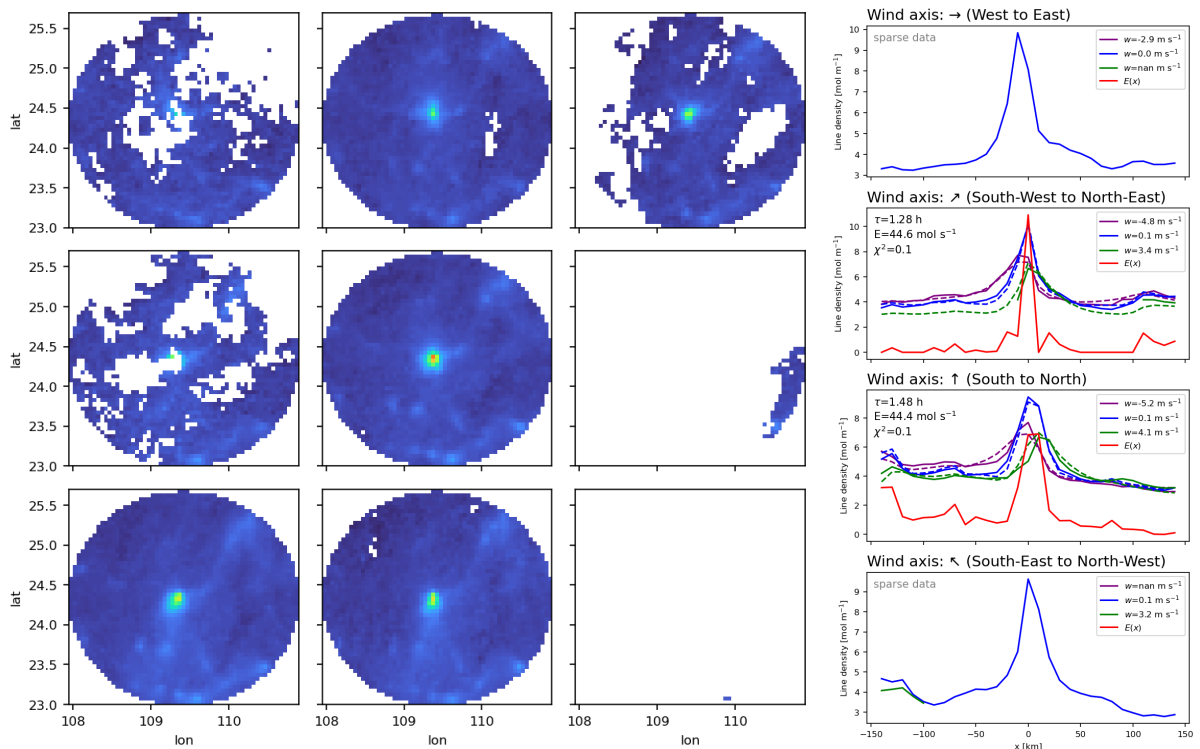



36.1 Winter

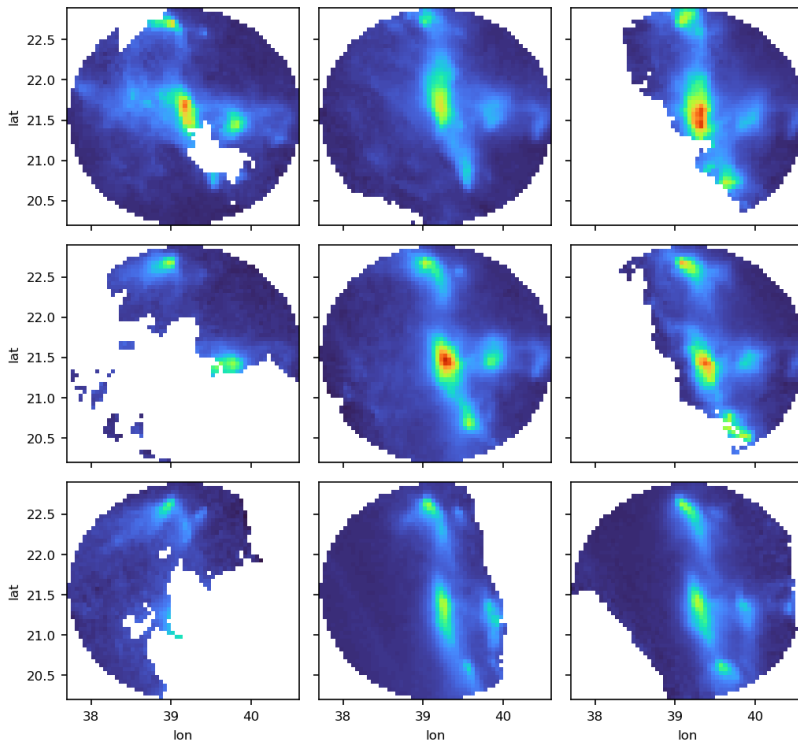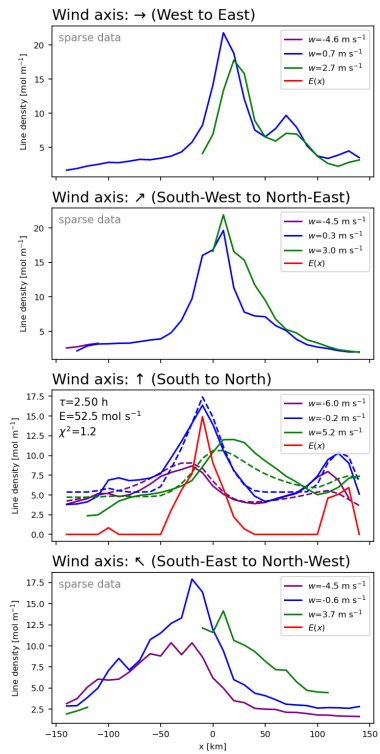

36.2 Spring

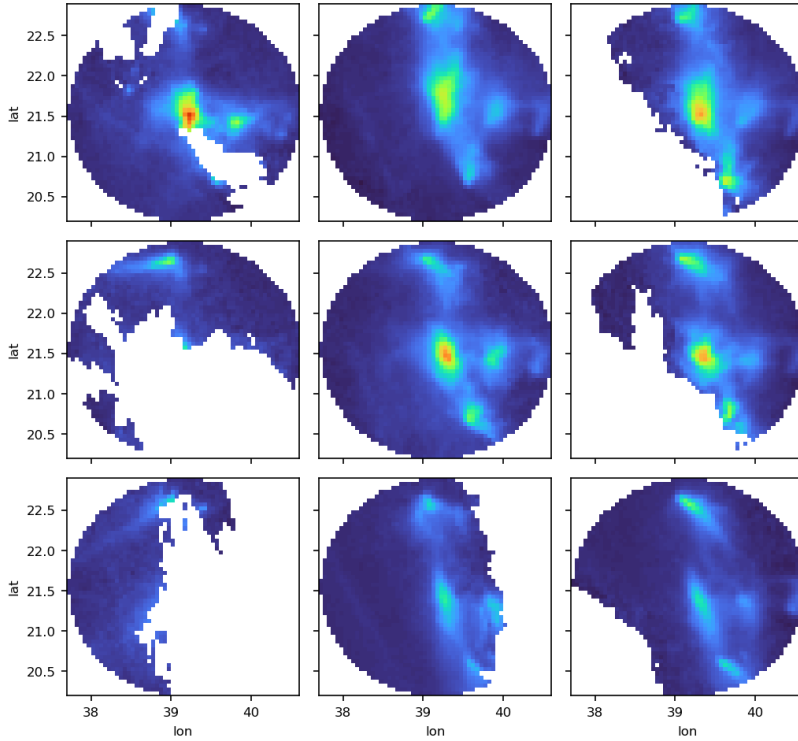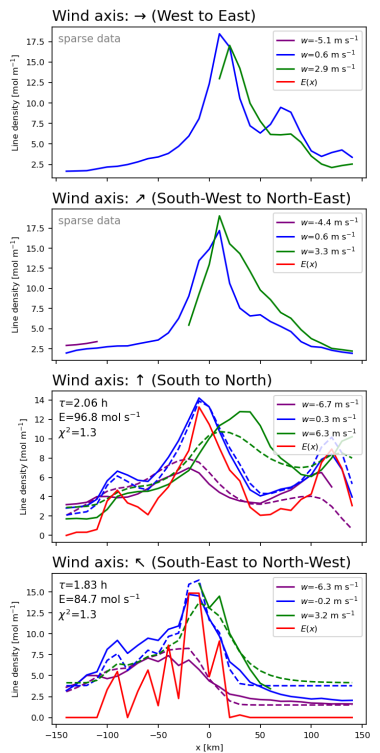

### 36.3 Summer

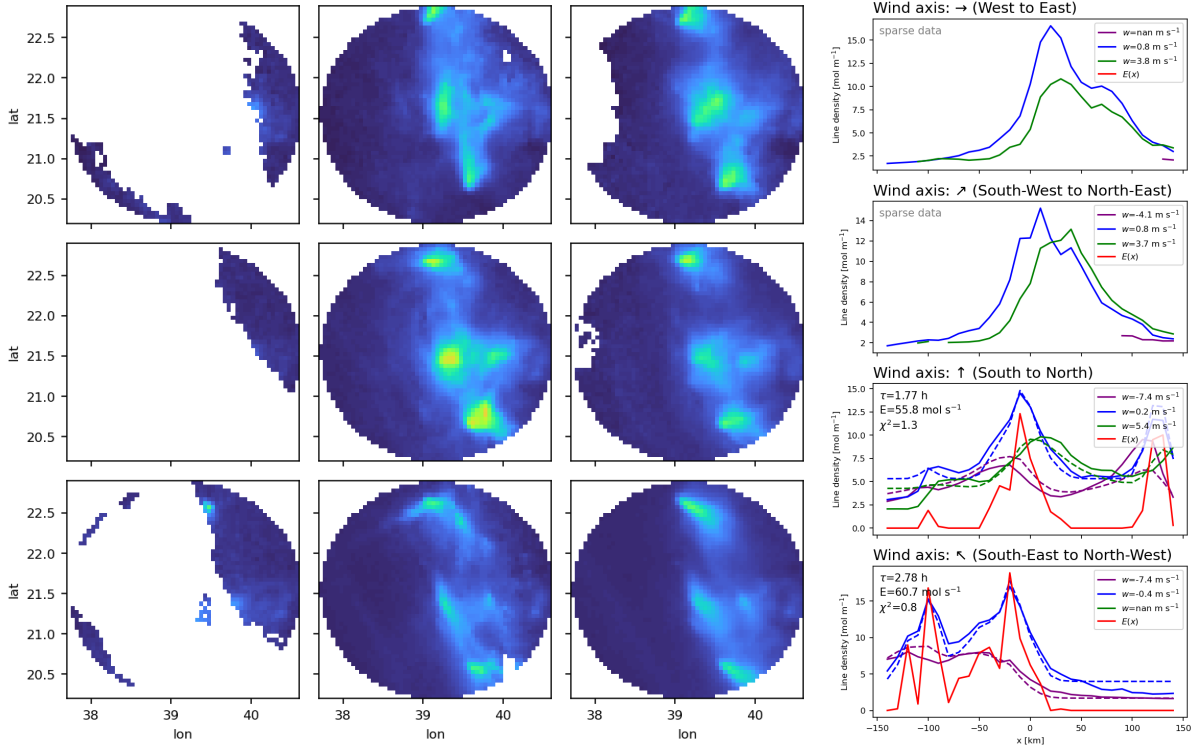

### 36.4 Autumn

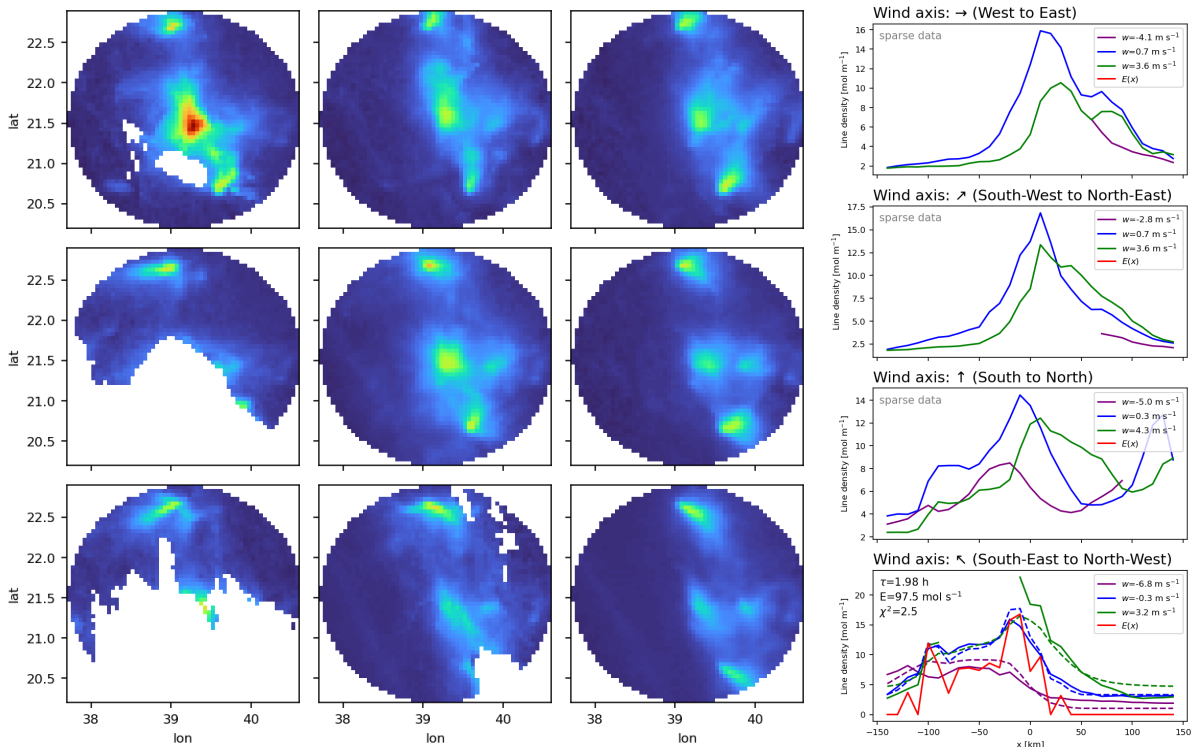

37.1 Winter

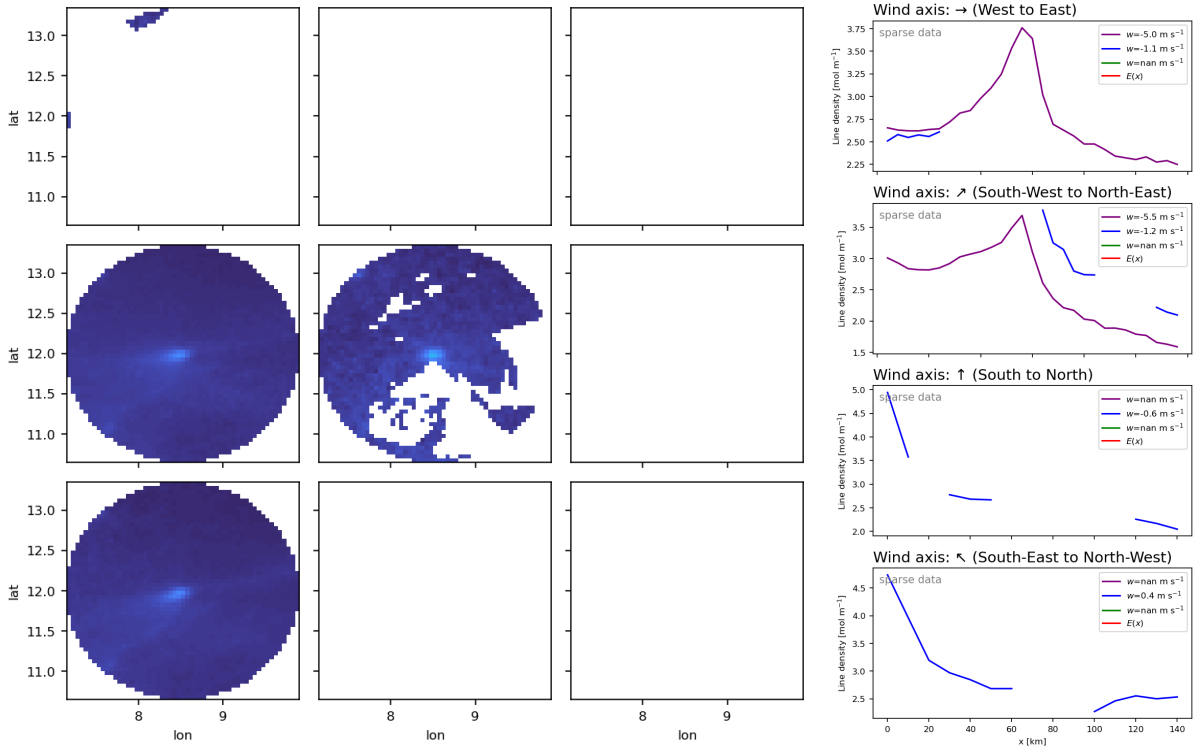

37.2 Spring

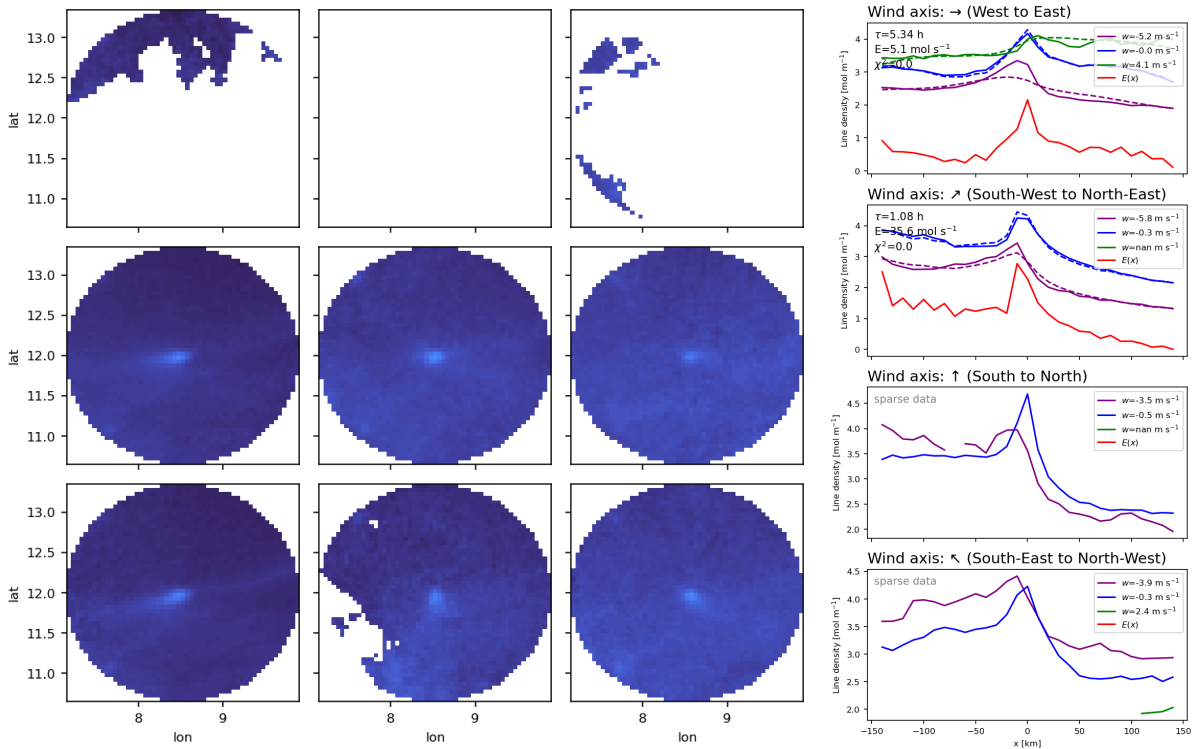

### 37.3 Summer

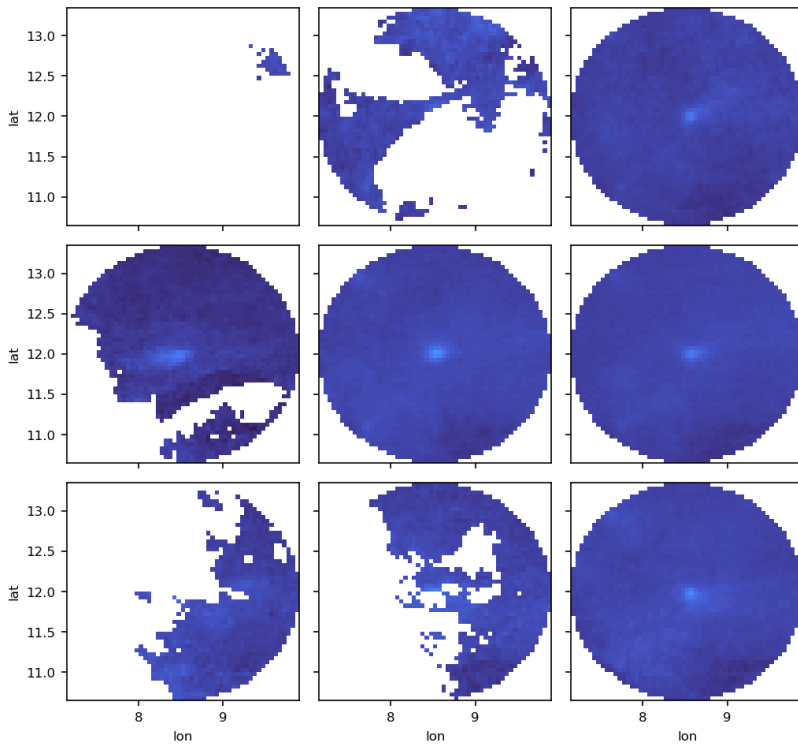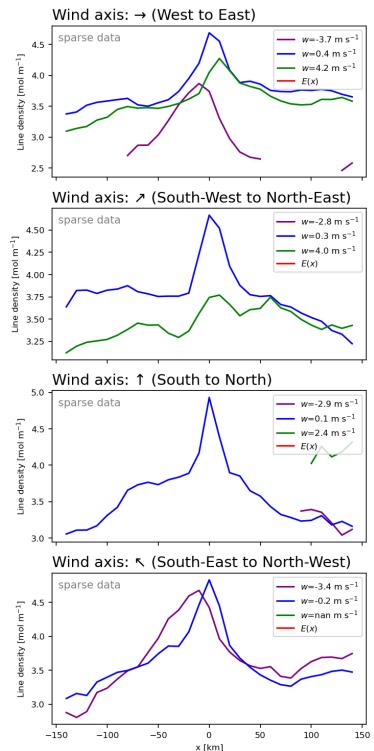

### 37.4 Autumn

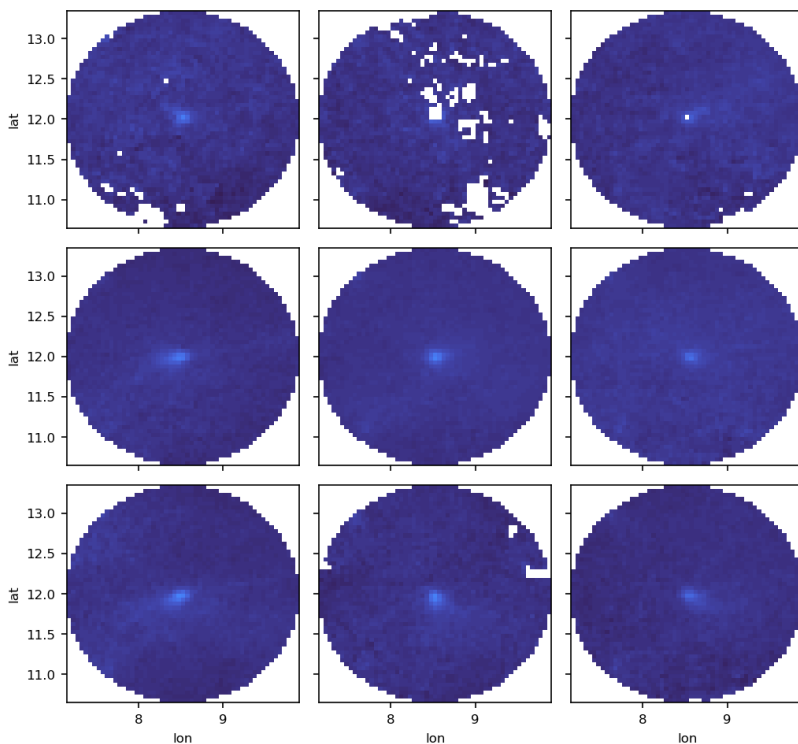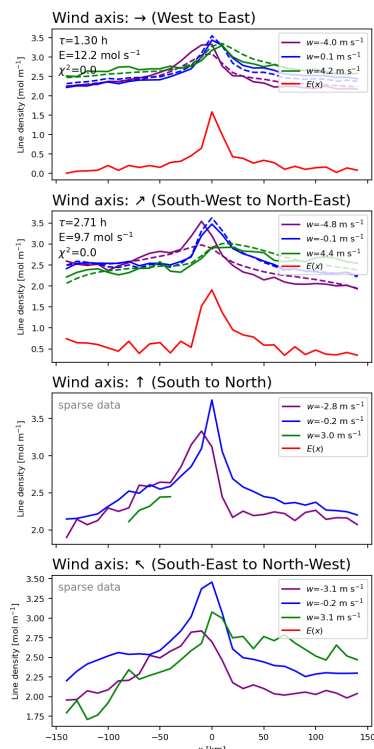

38.1 Winter

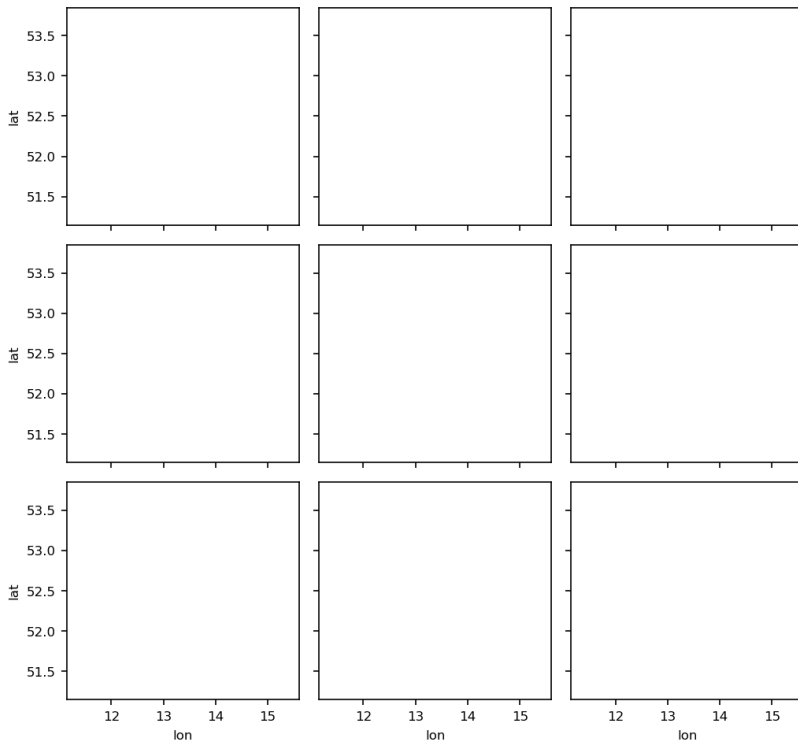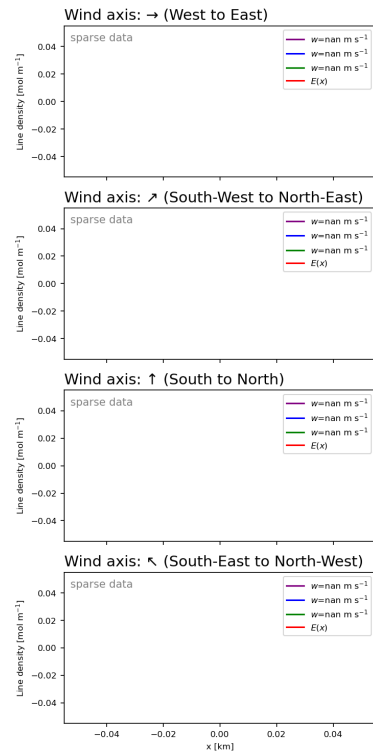

38.2 Spring

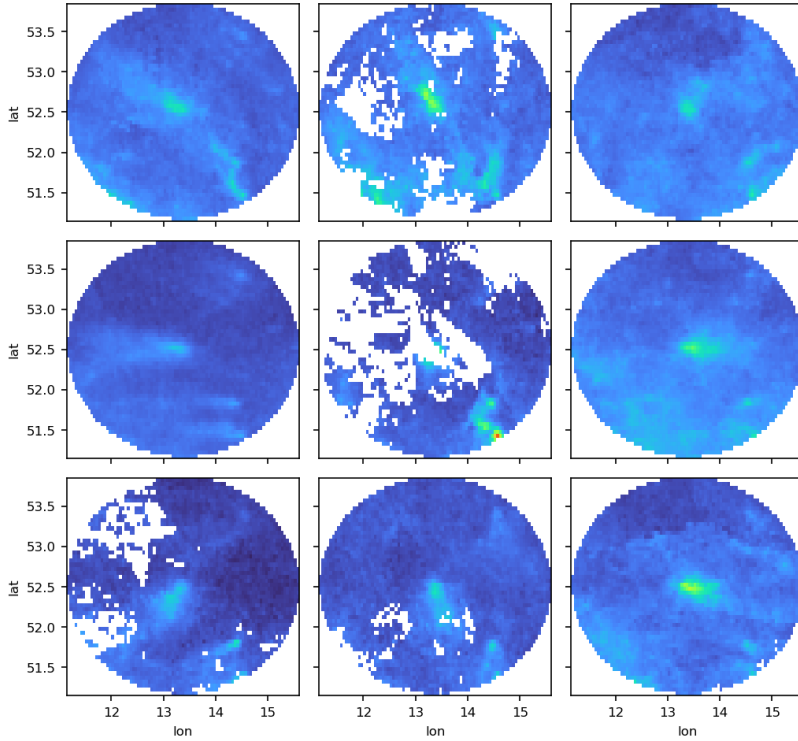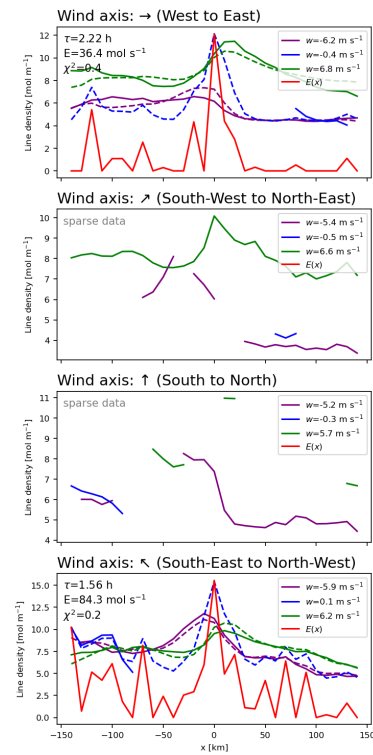

### 38.3 Summer

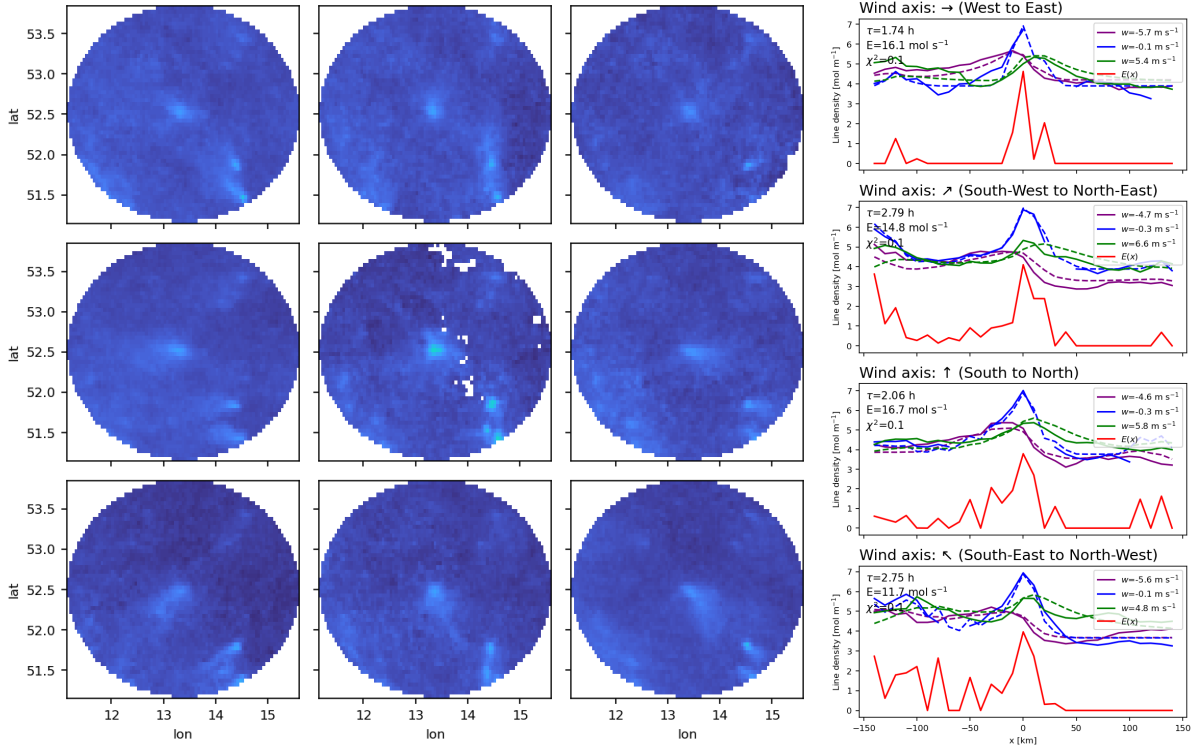

### 38.4 Autumn

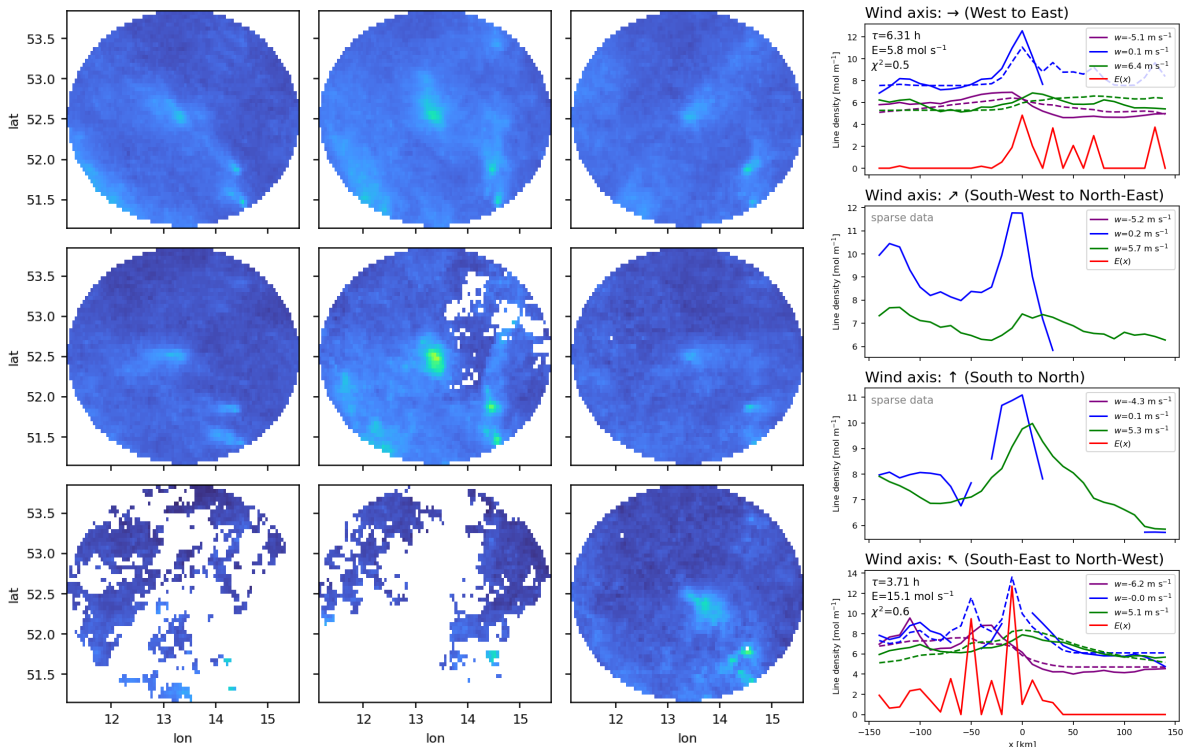

## 39 Montréal

### 39.1 Winter

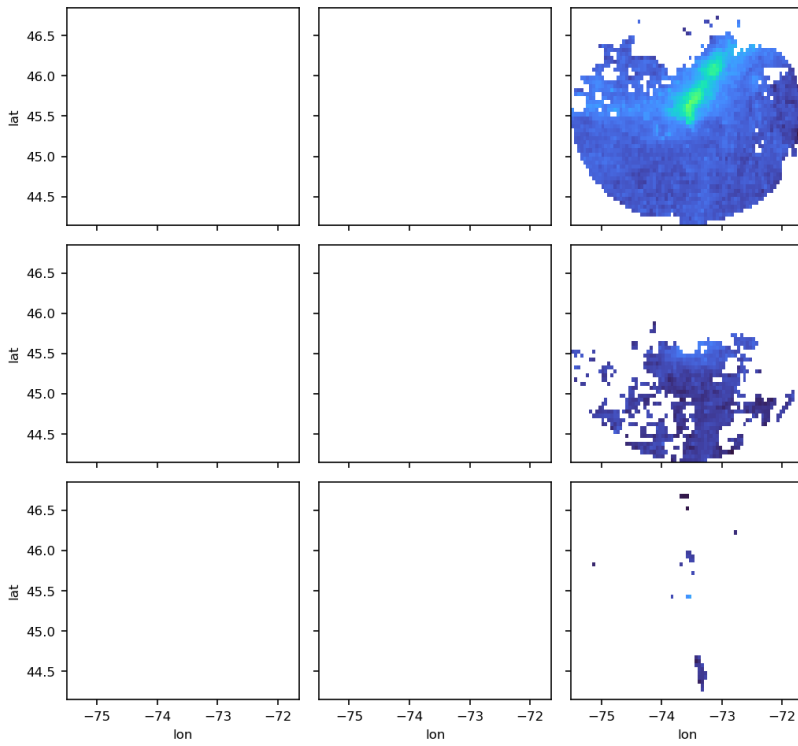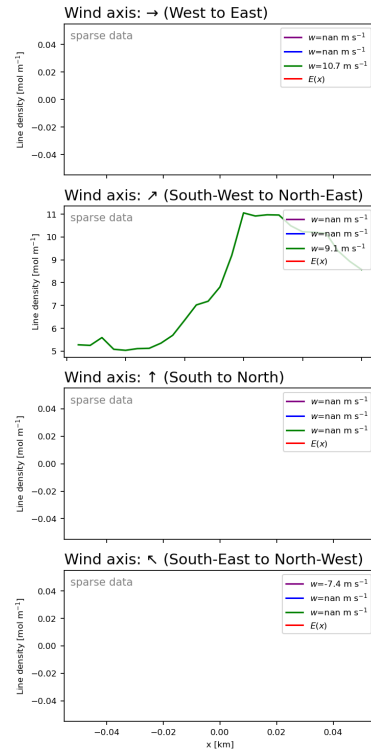

### 39.2 Spring

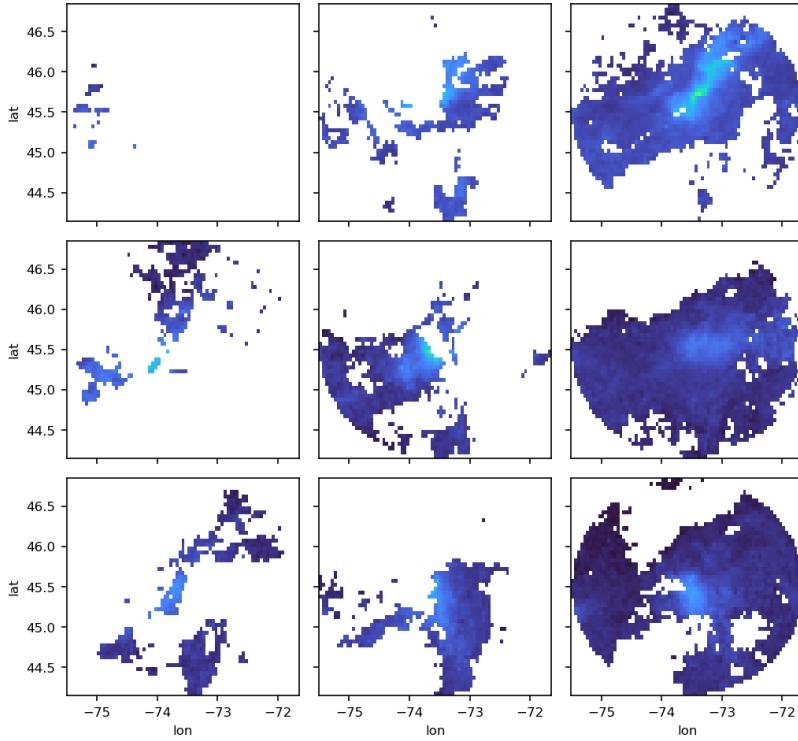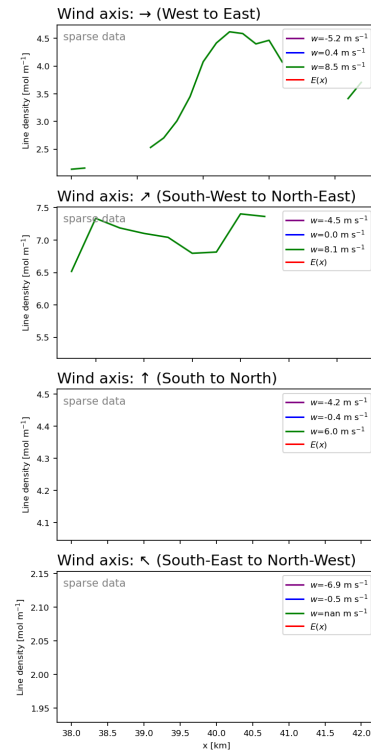

### 39.3 Summer

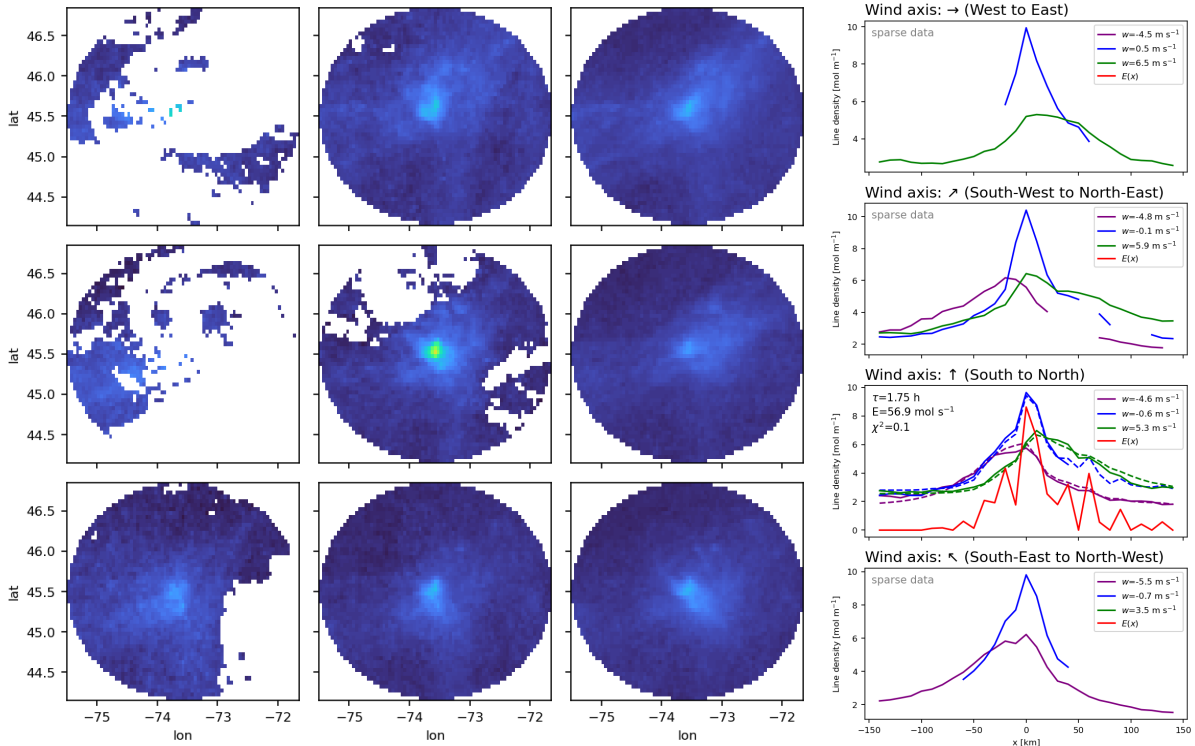

### 39.4 Autumn

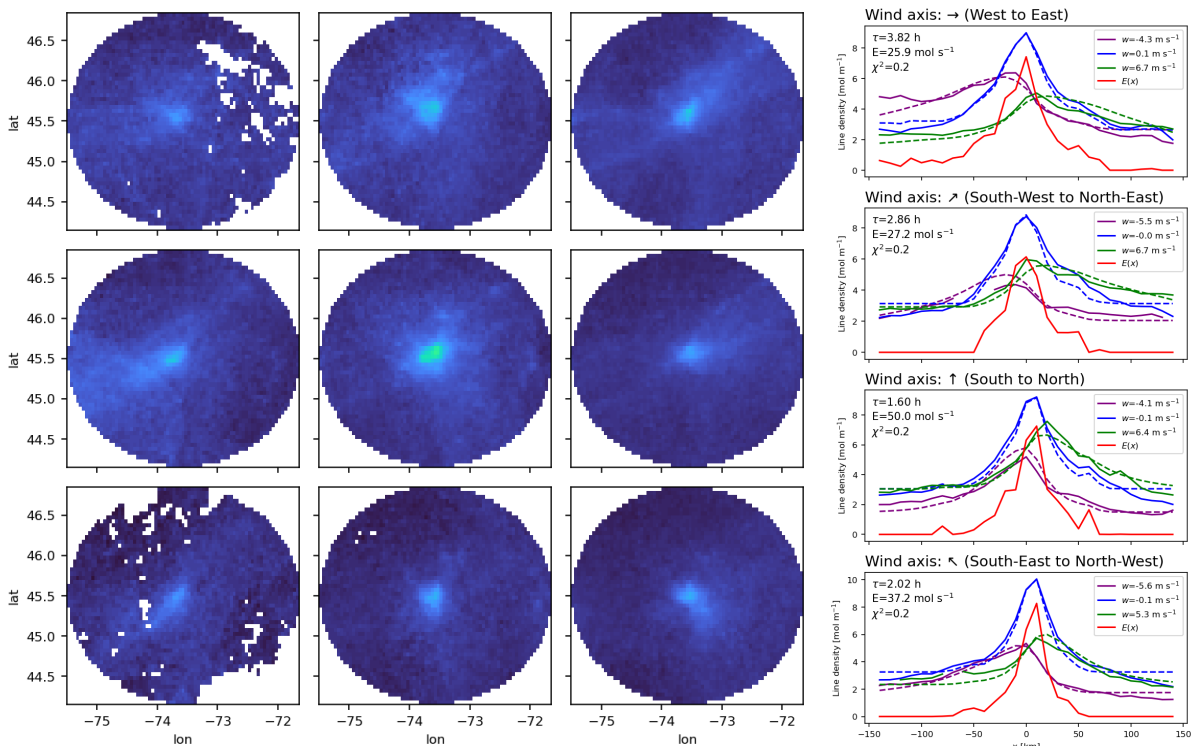



40.1 Winter

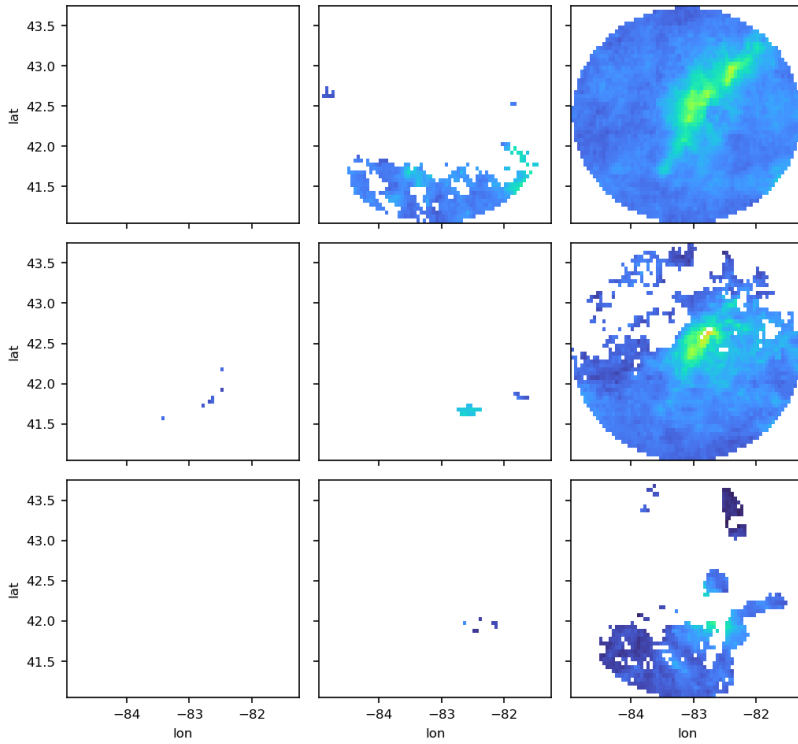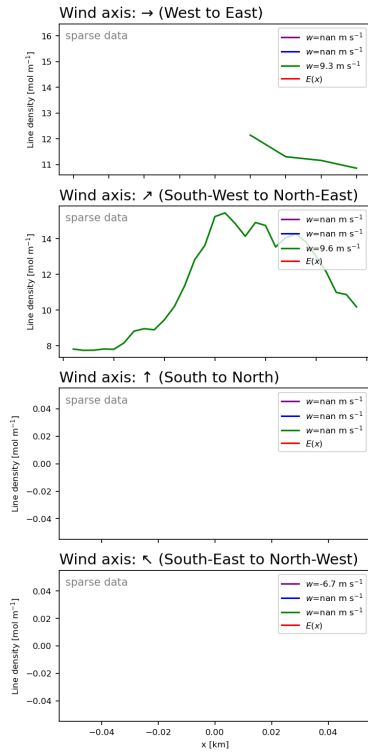

40.2 Spring

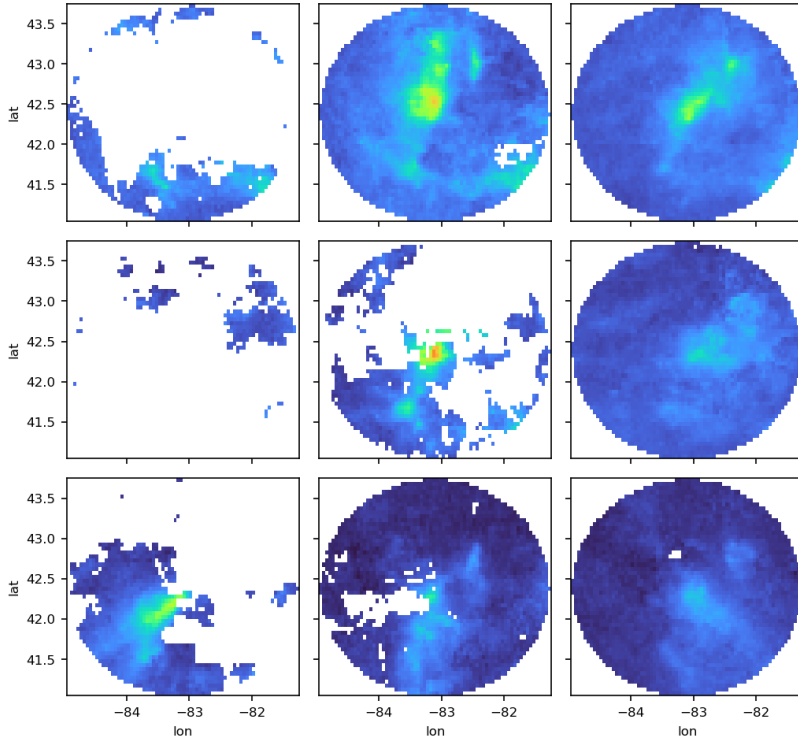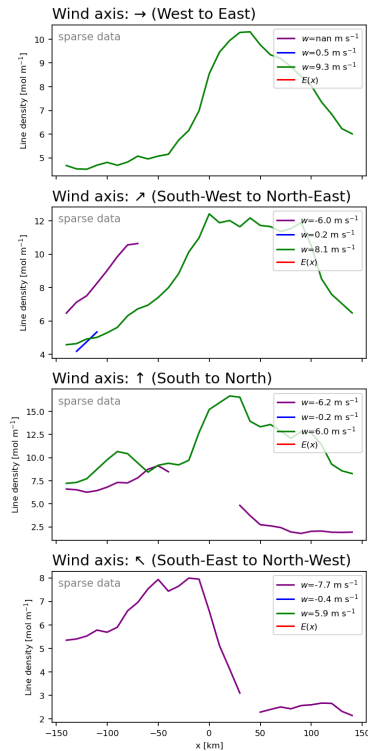

### 40.3 Summer

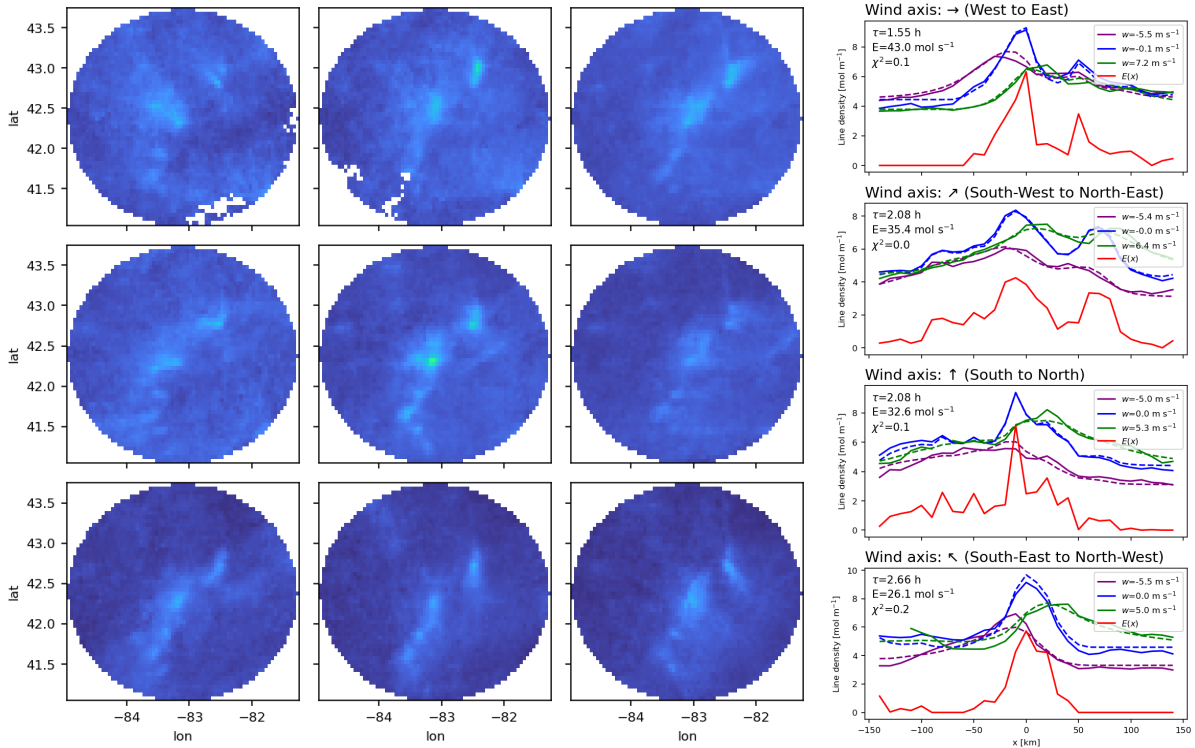

### 40.4 Autumn

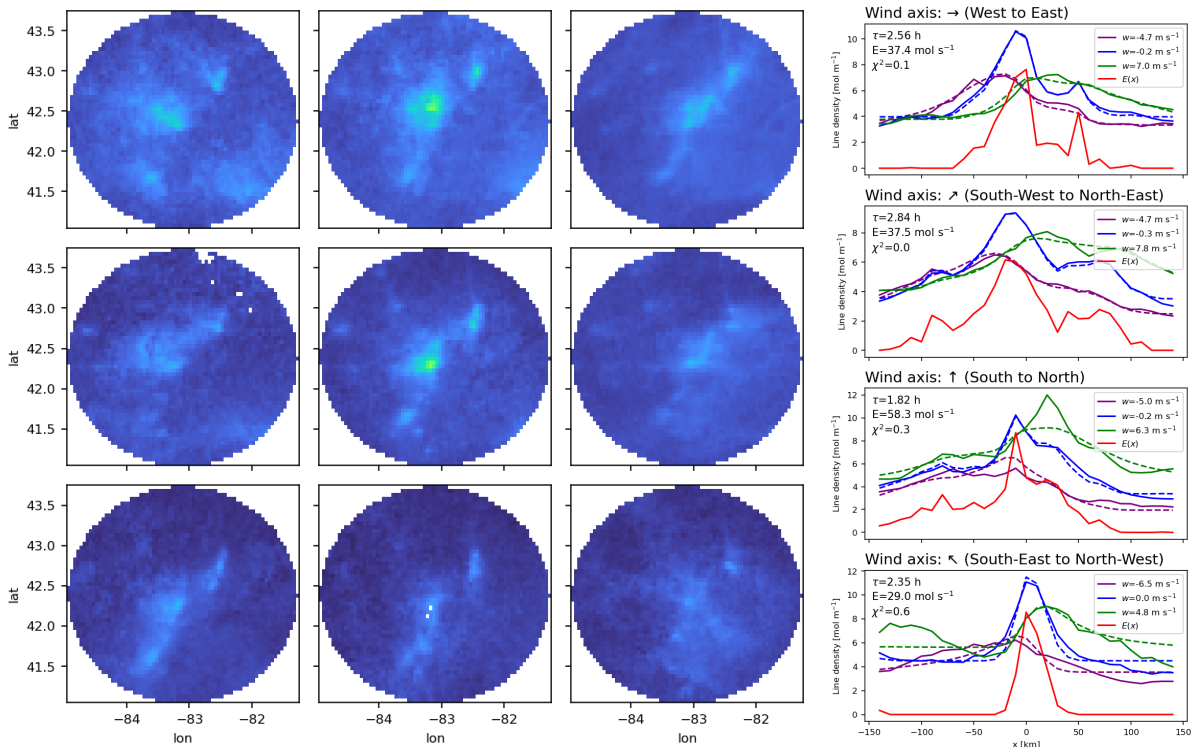

# 41 Algiers

## 41.1 Winter

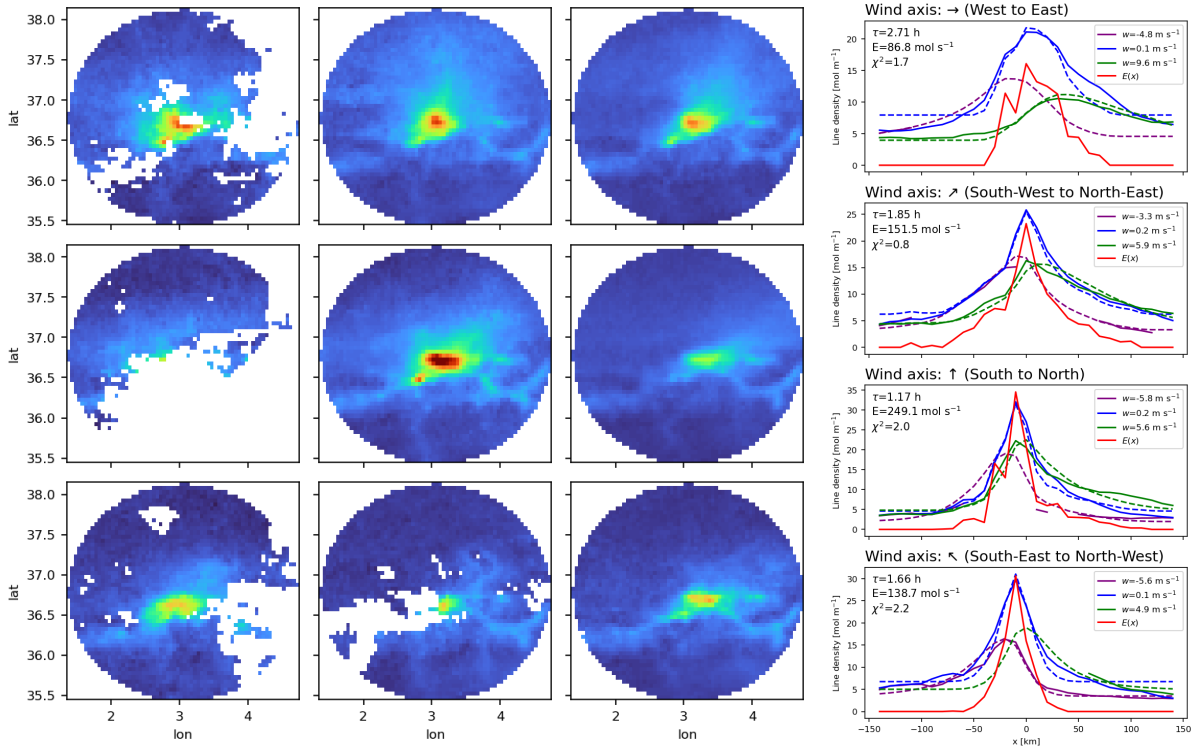

## 41.2 Spring

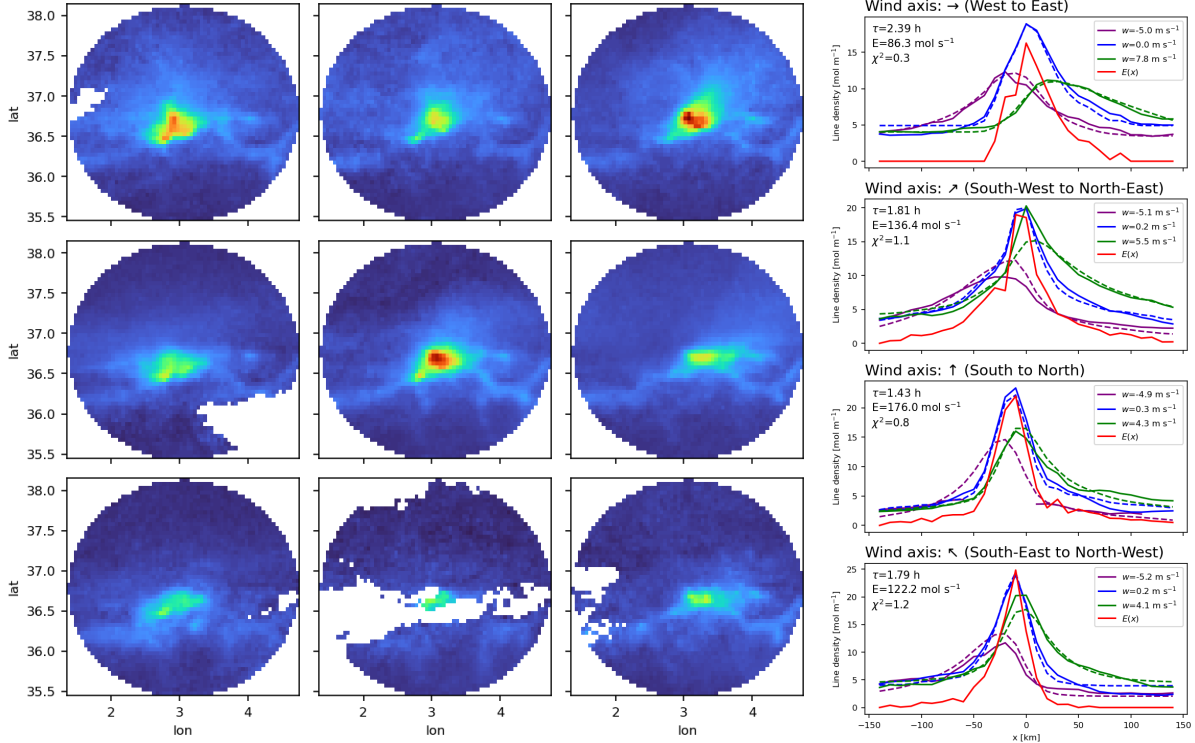

### 41.3 Summer

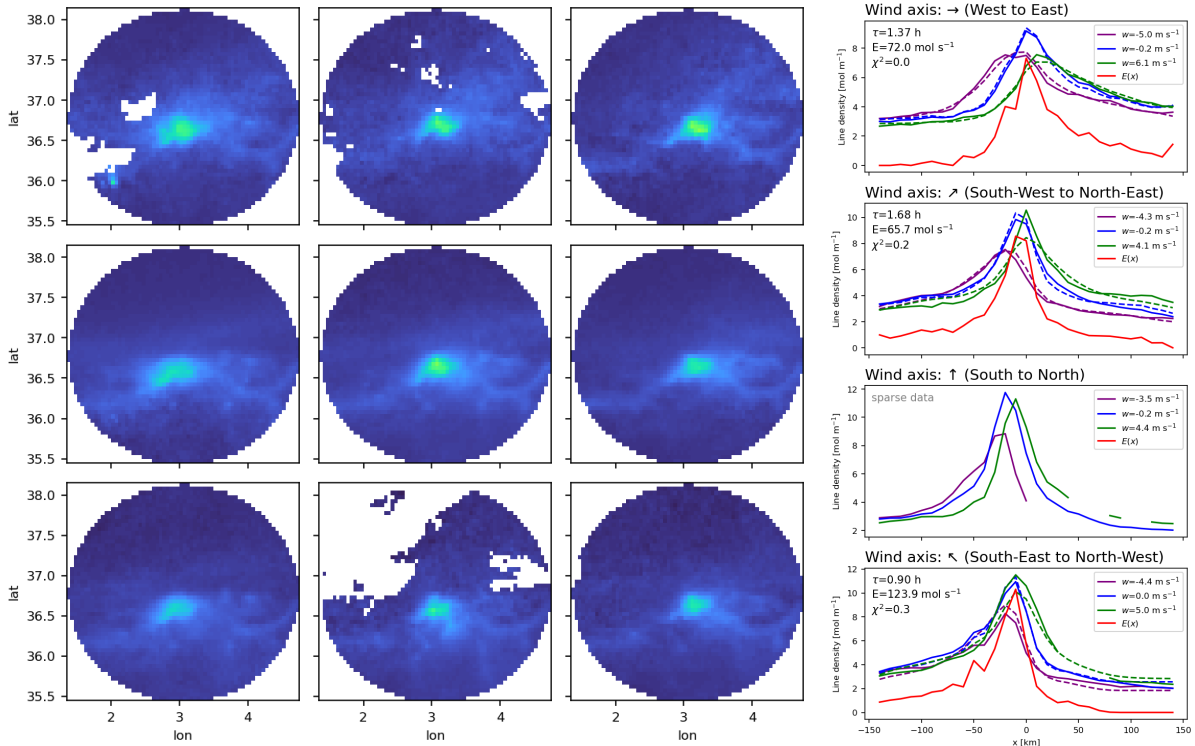

### 41.4 Autumn

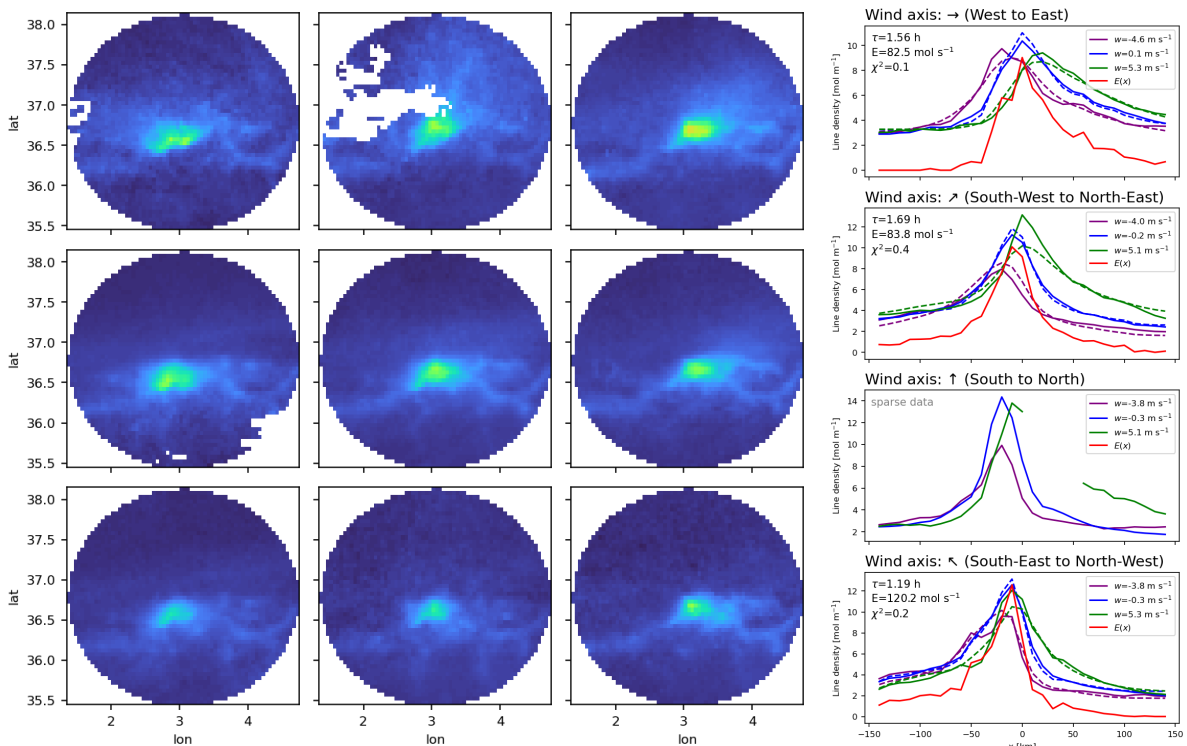

## 42 Kuwait City

### 42.1 Winter

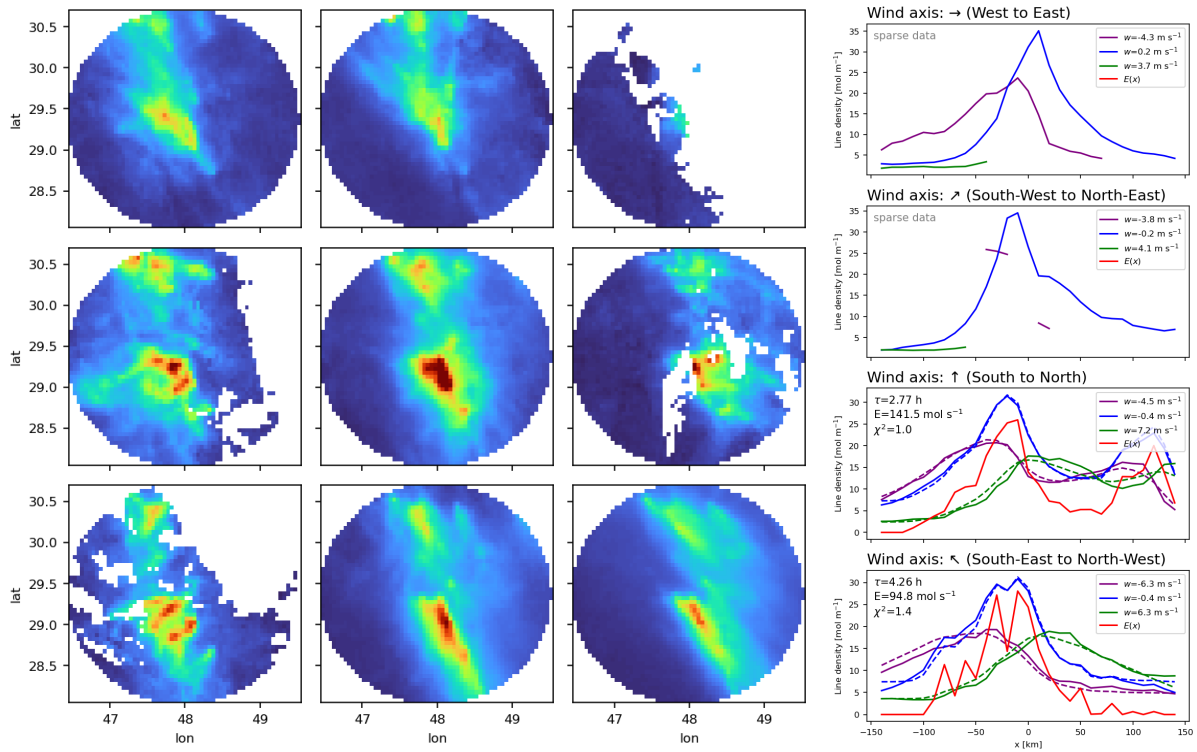

### 42.2 Spring

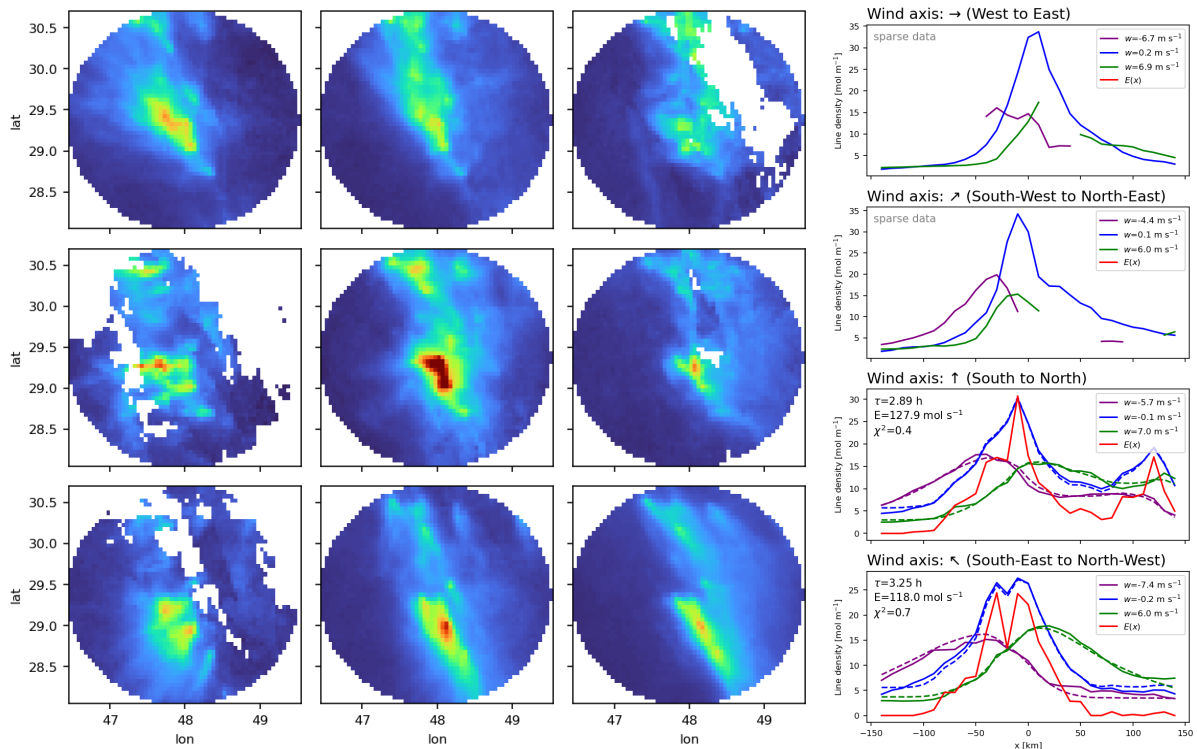

## 42.3 Summer

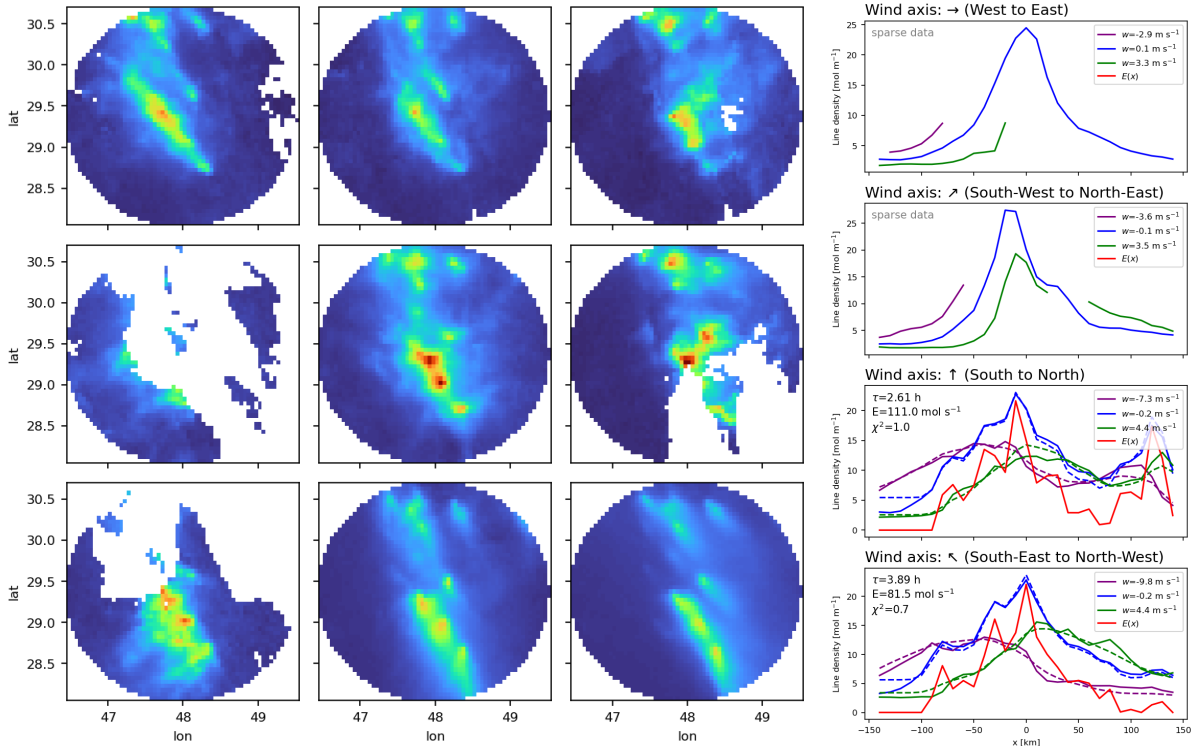

## 42.4 Autumn

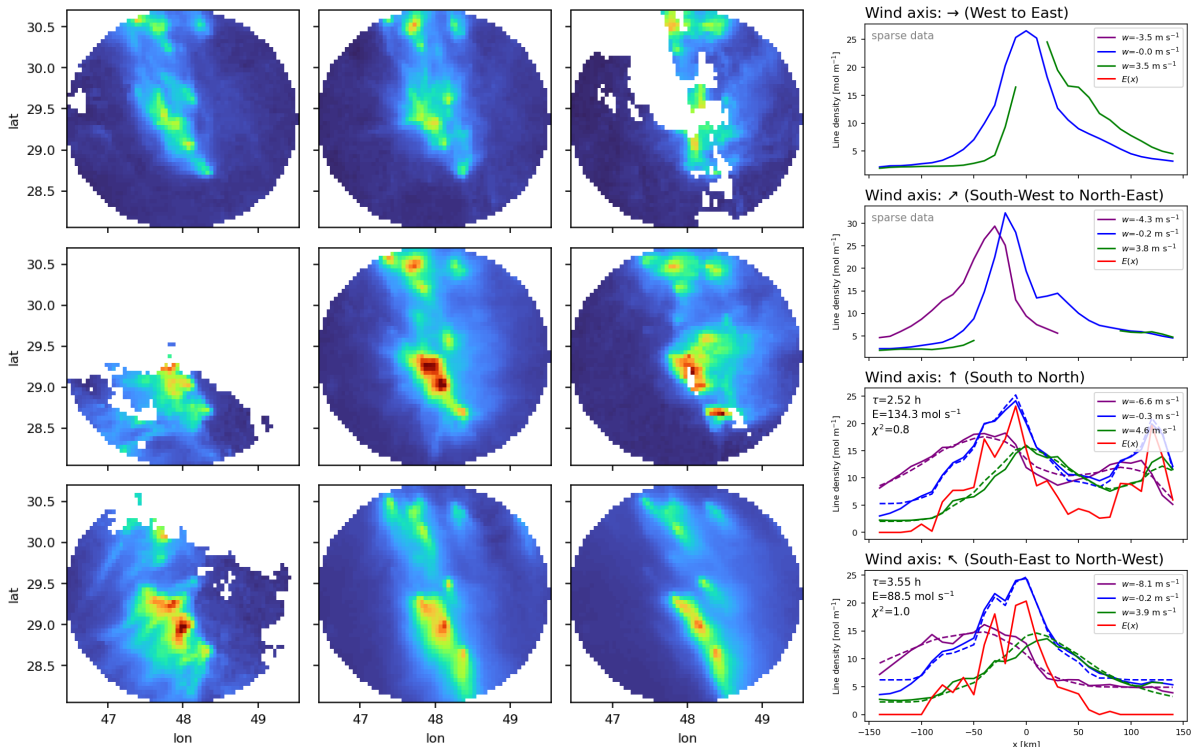

## 43 Minneapolis

### 43.1 Winter

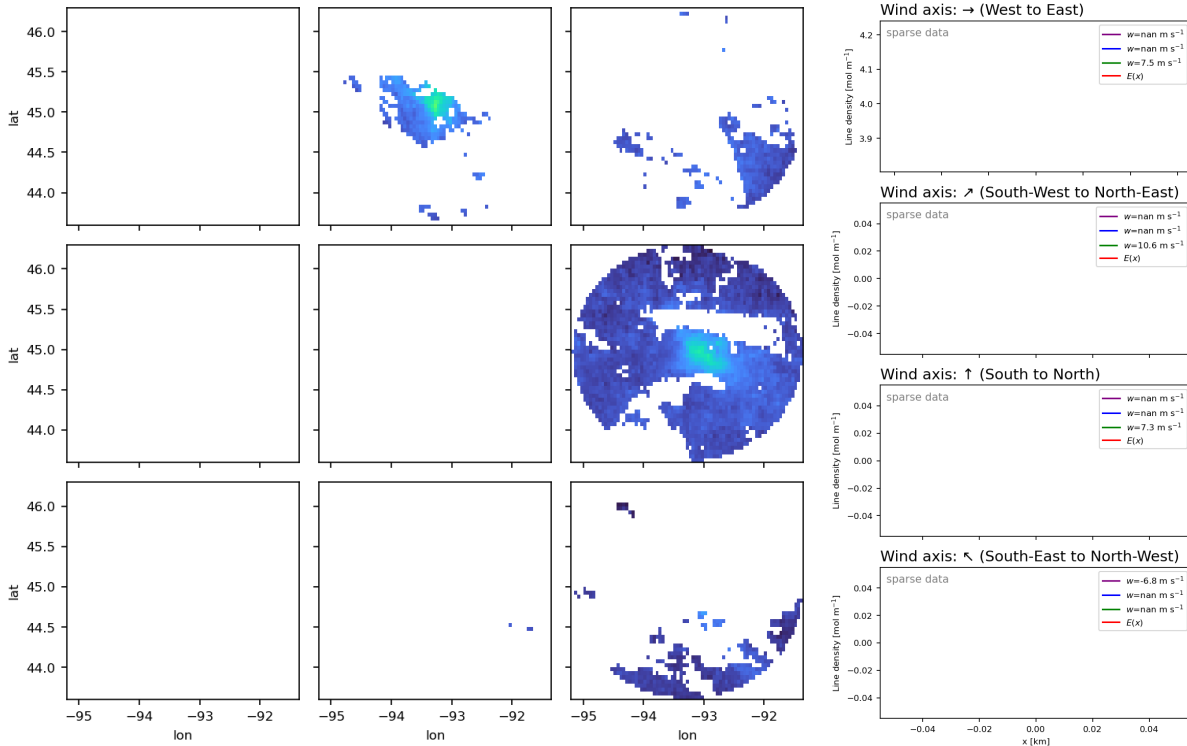

### 43.2 Spring

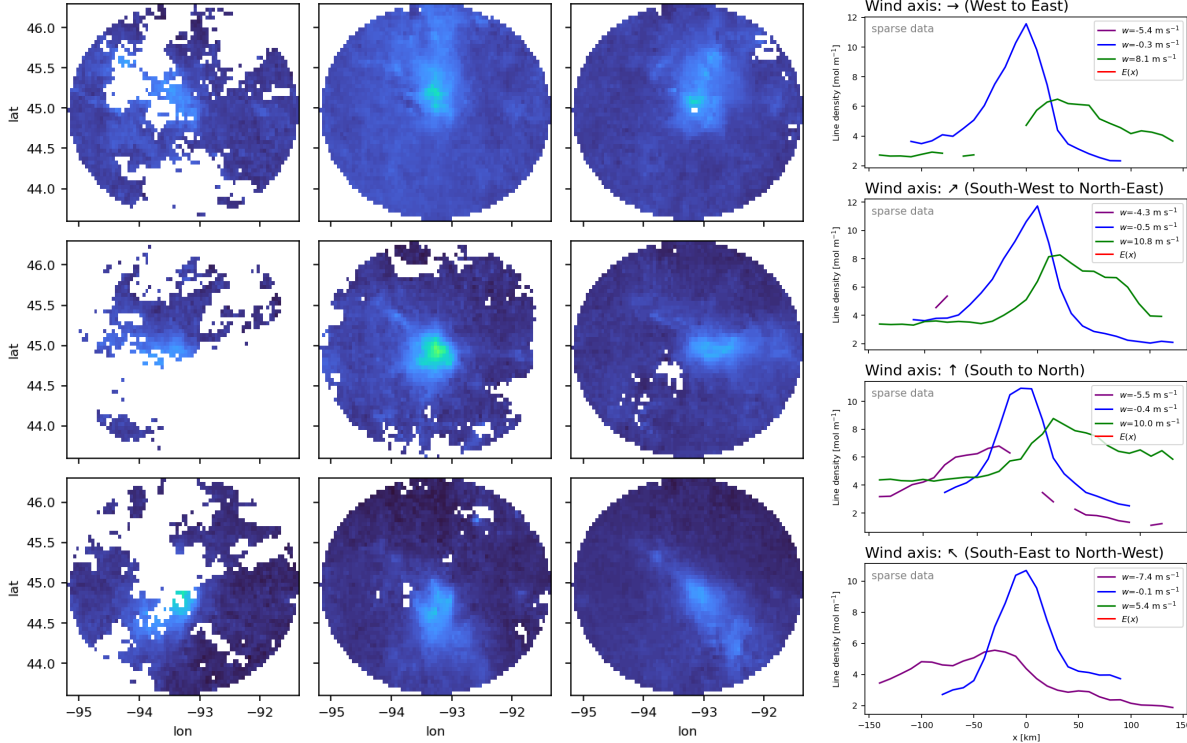

### 43.3 Summer

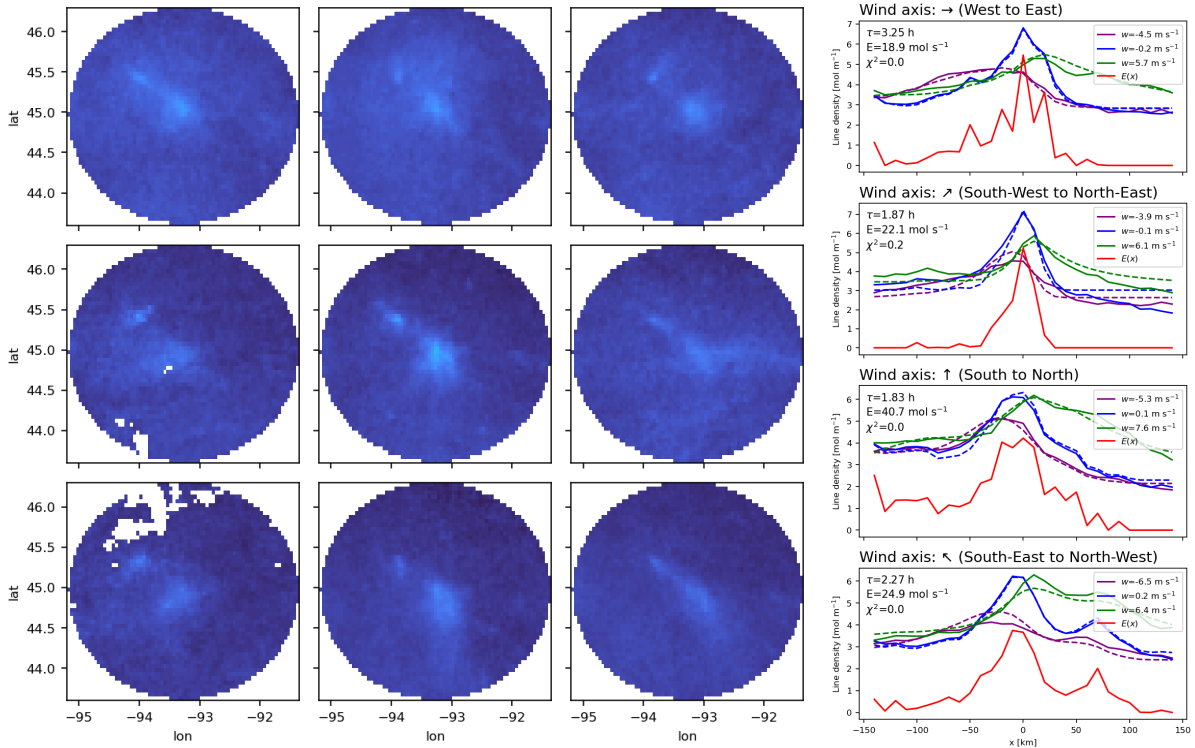

### 43.4 Autumn

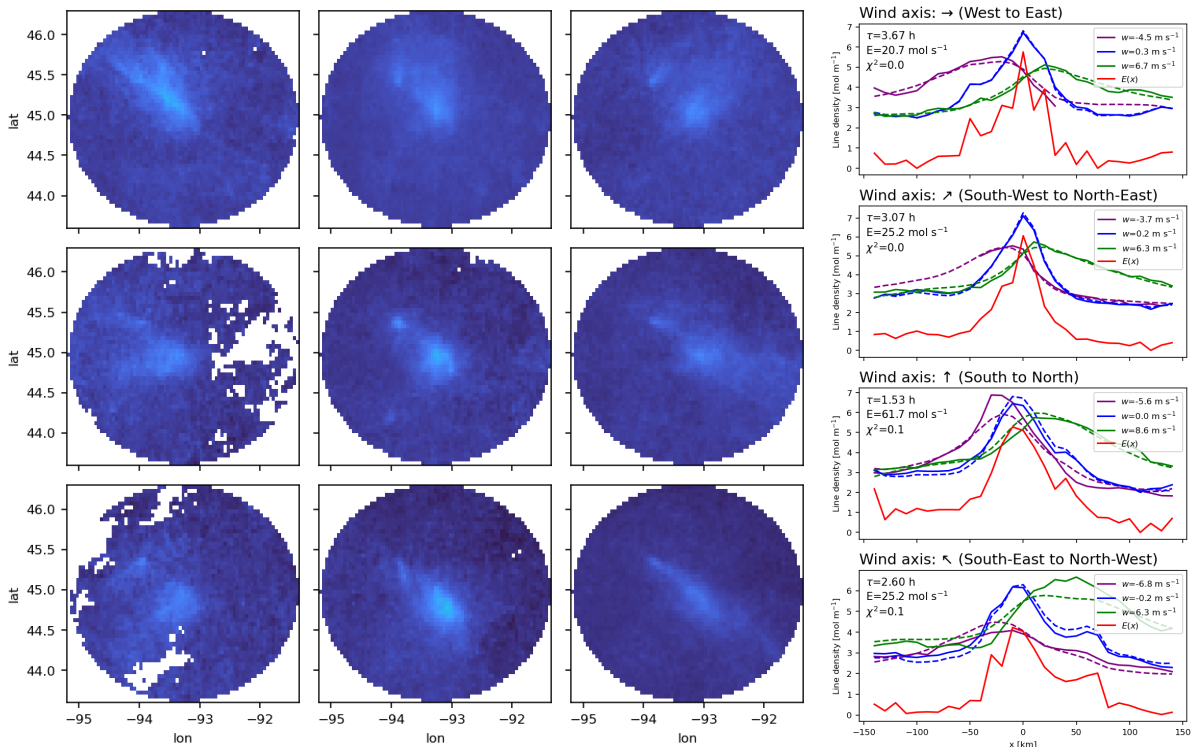



44.1 Winter

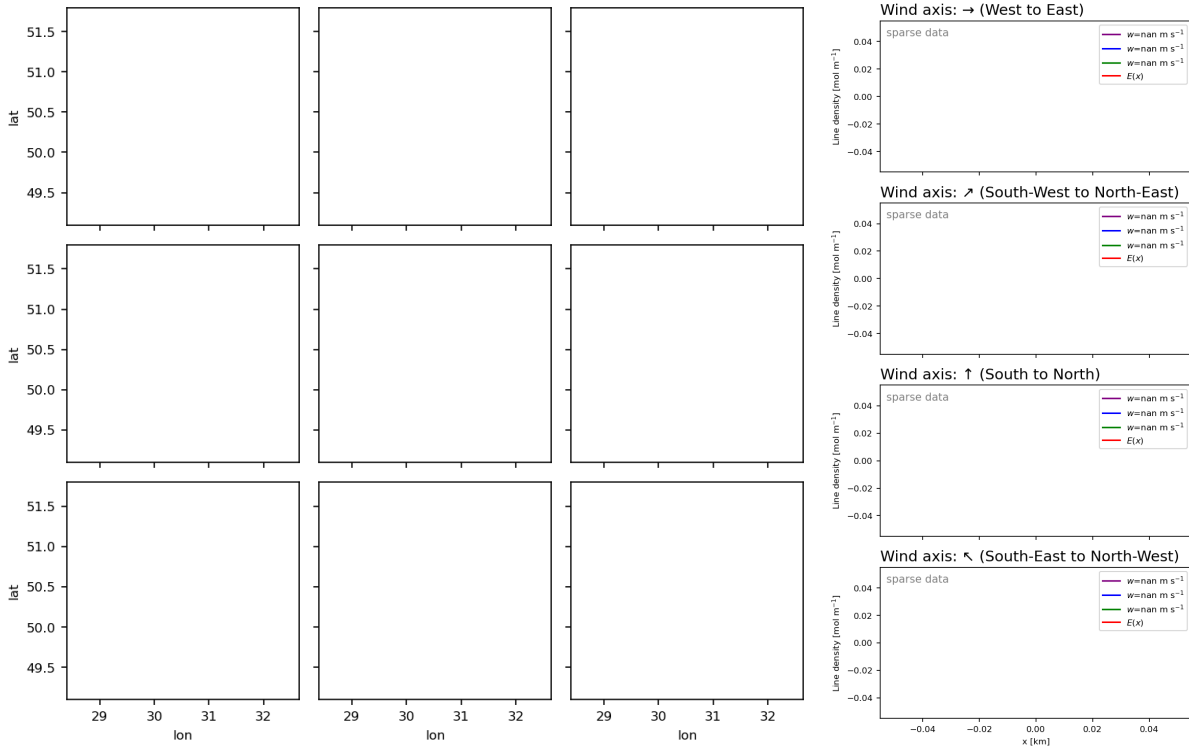

44.2 Spring

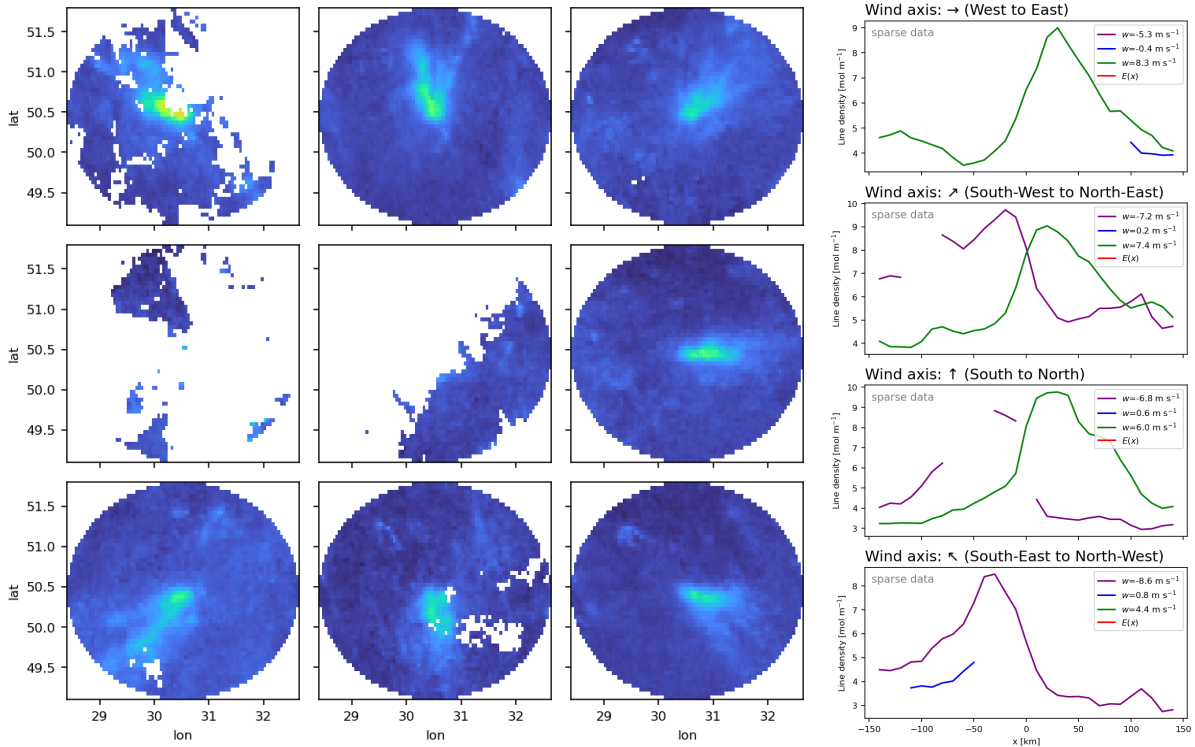

### 44.3 Summer

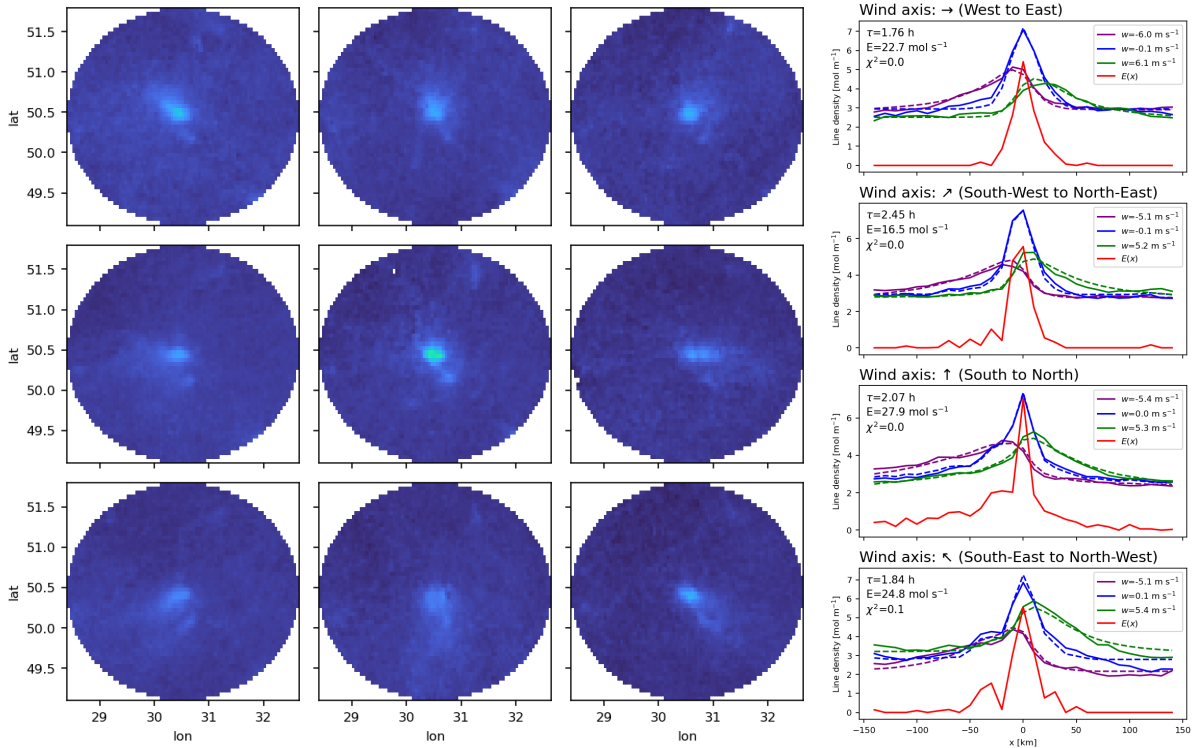

### 44.4 Autumn

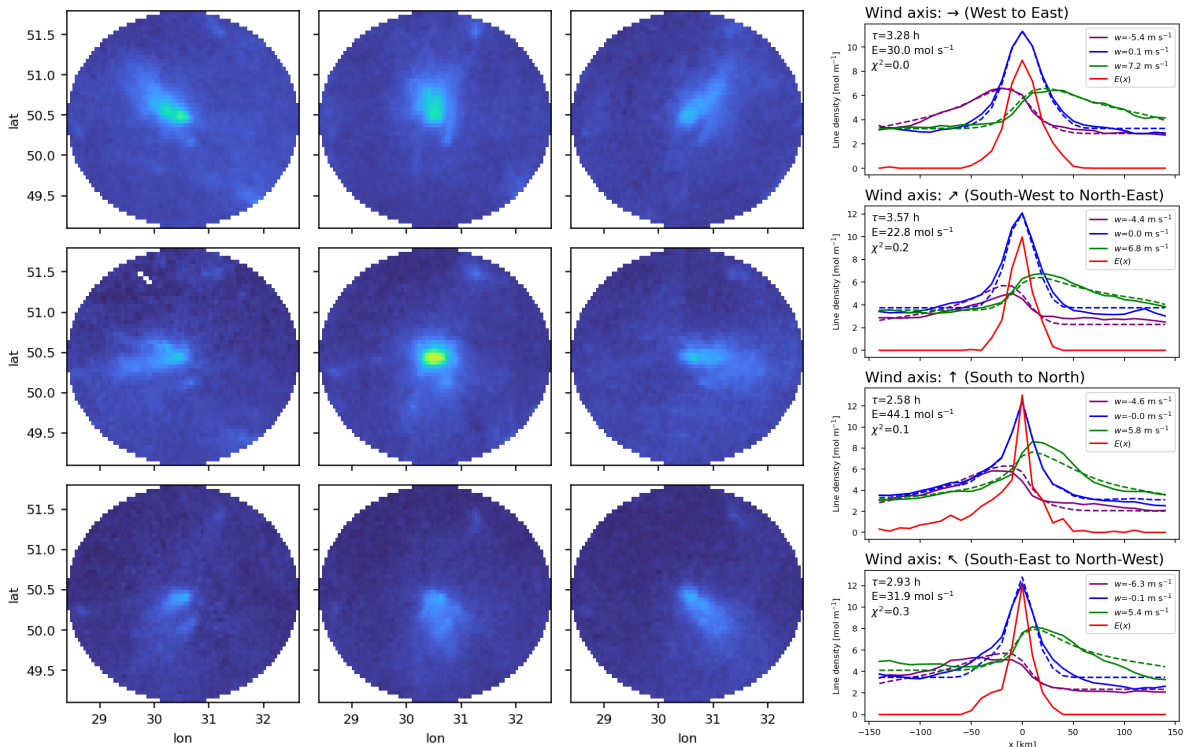

45.1 Winter

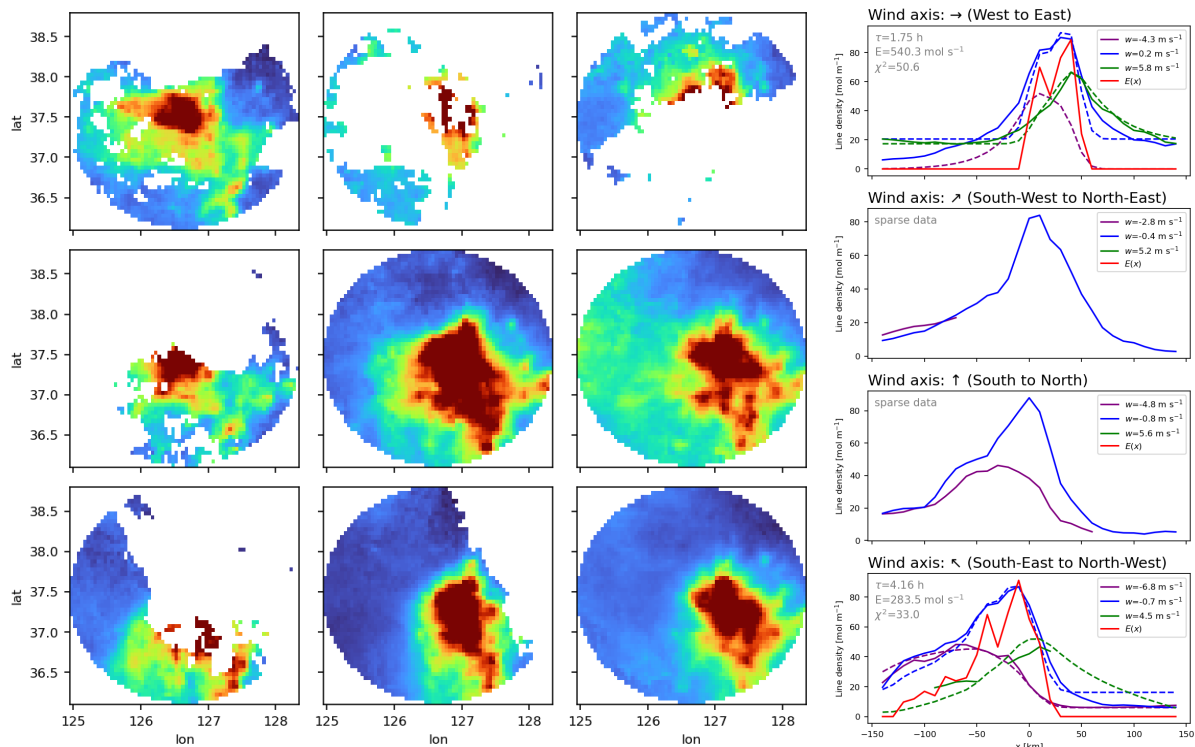

45.2 Spring

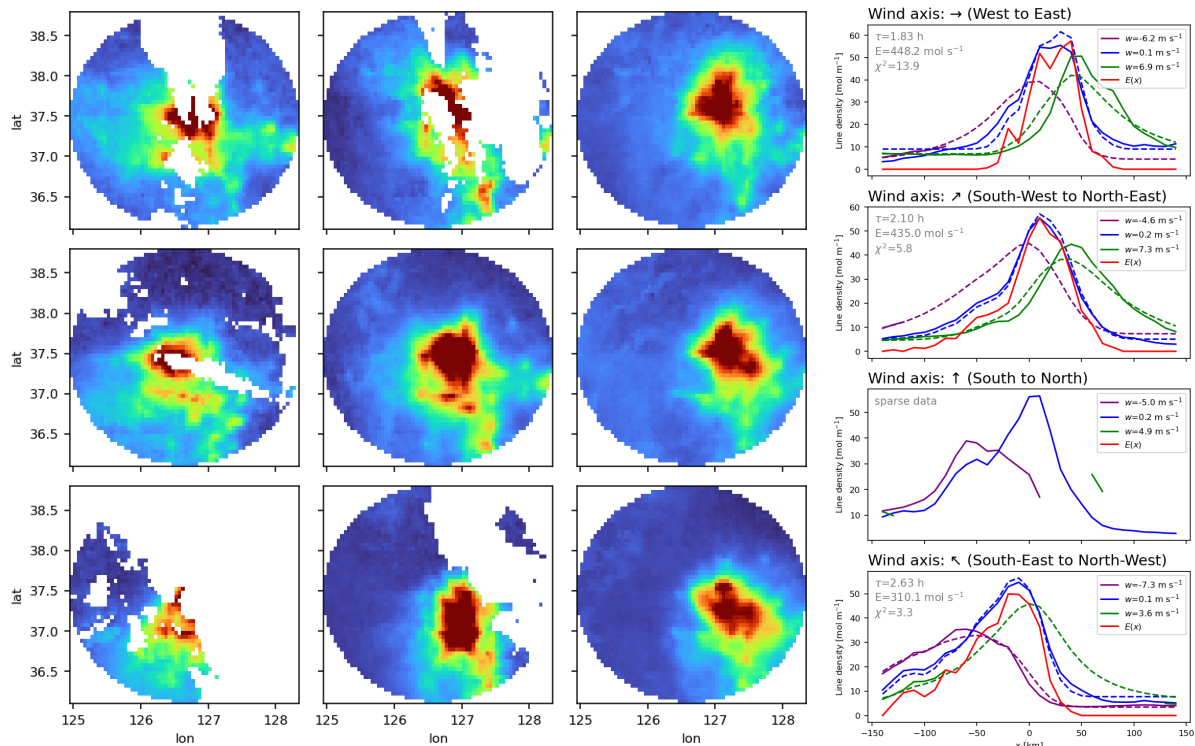

### 45.3 Summer

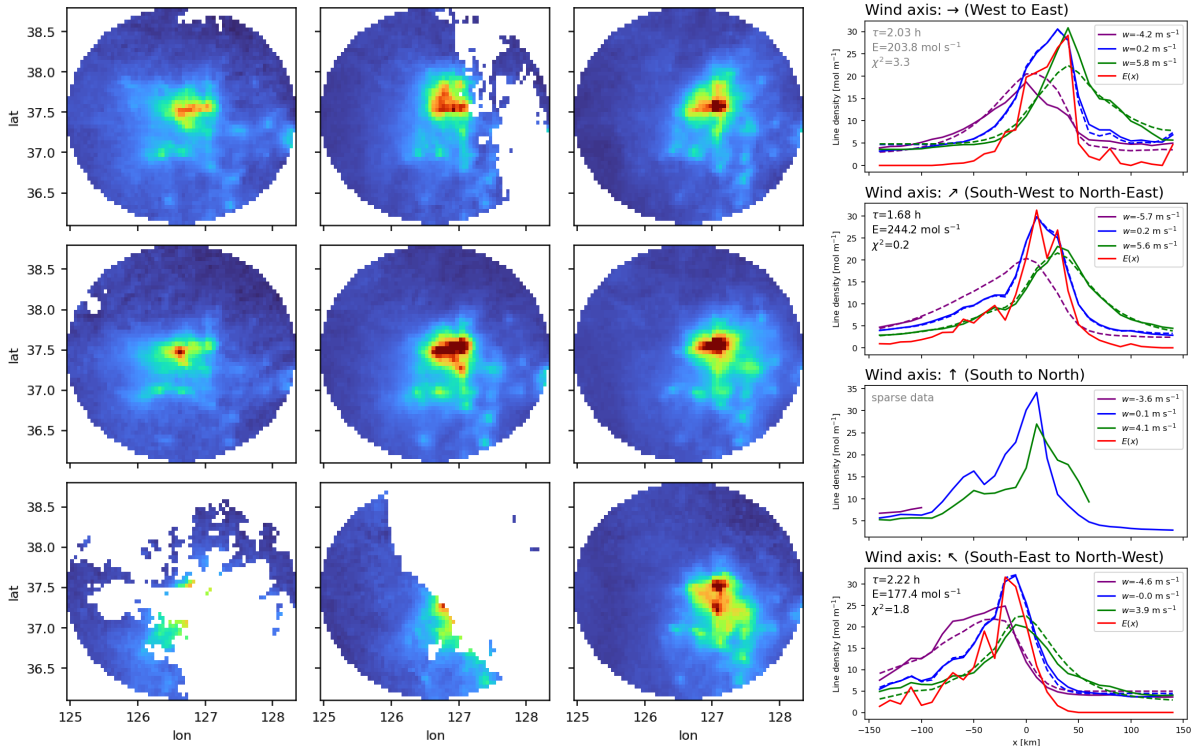

### 45.4 Autumn

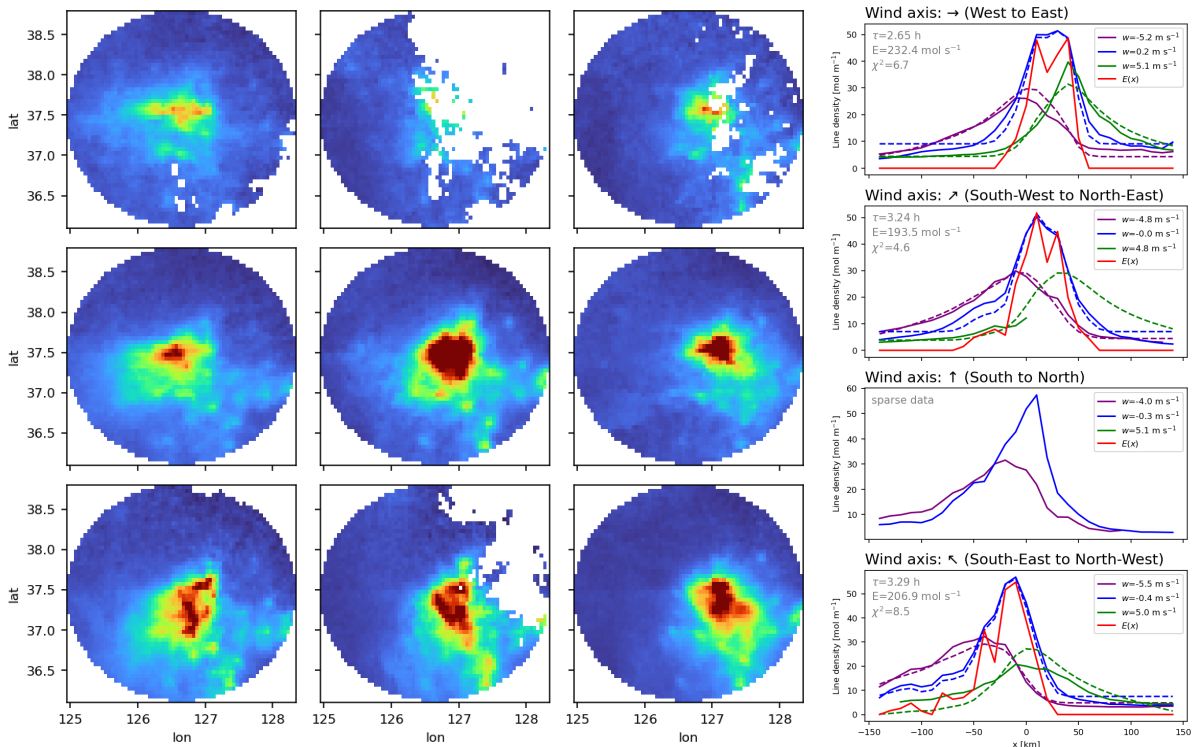

46.1 Winter

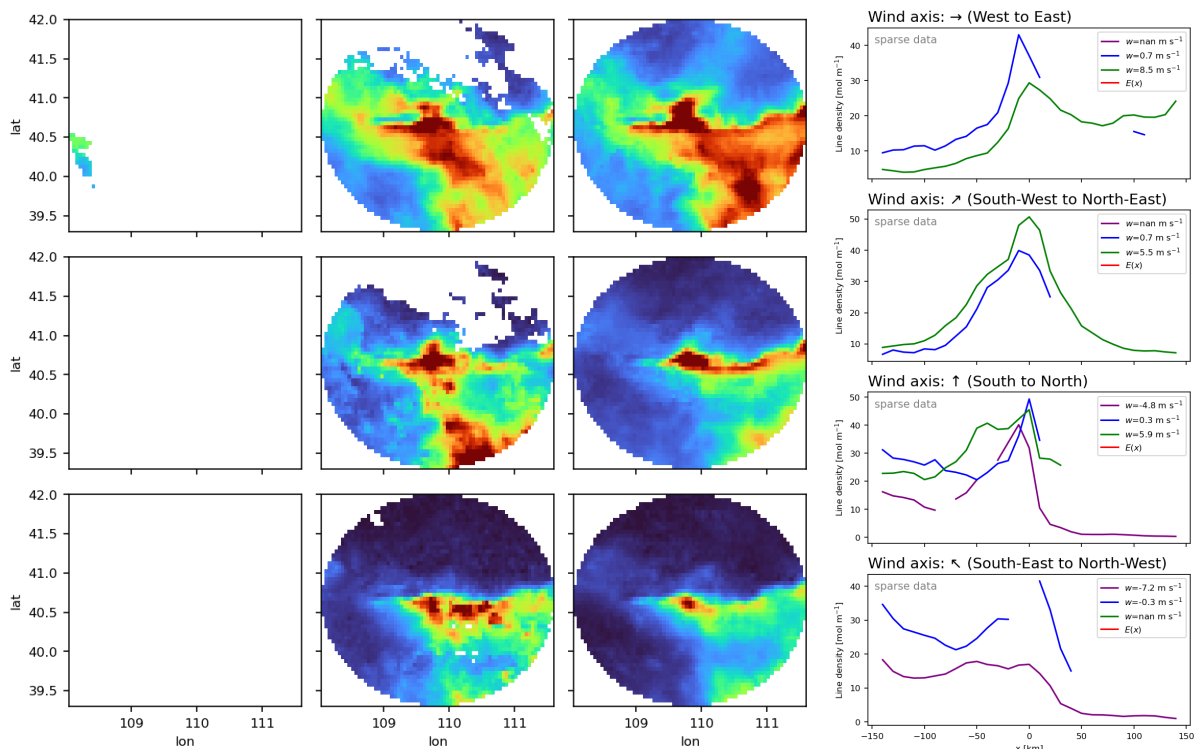

46.2 Spring

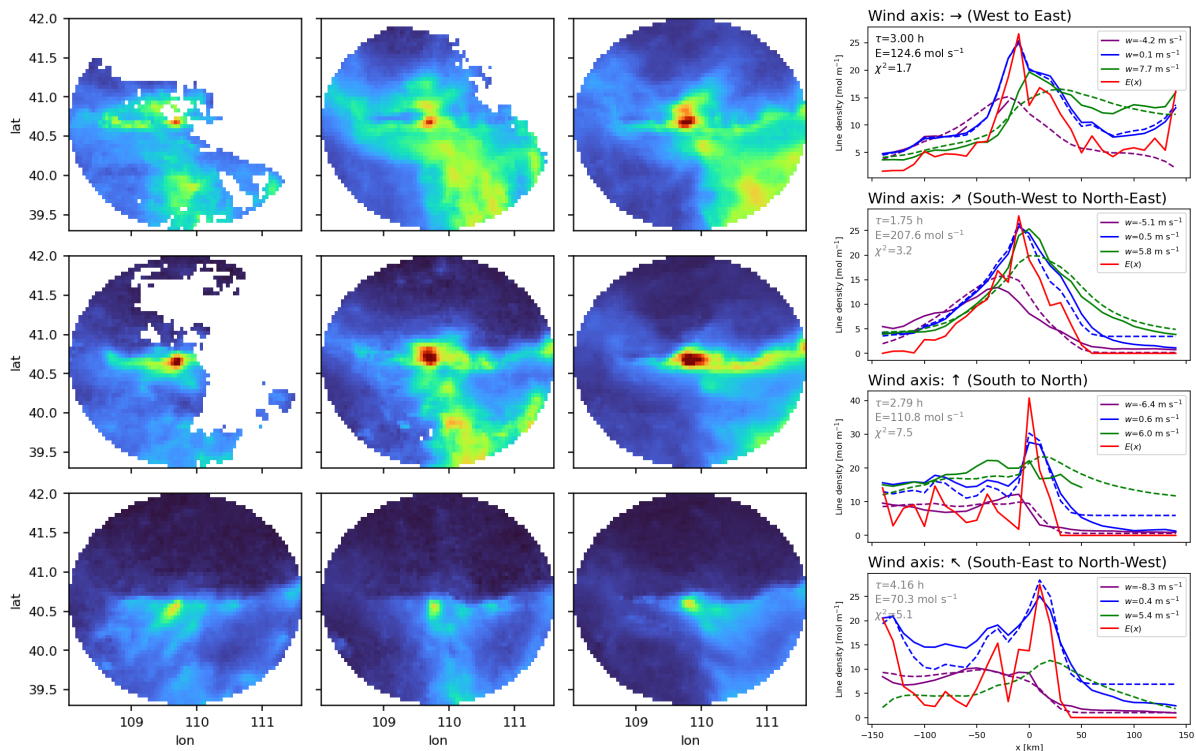

## 46.3 Summer

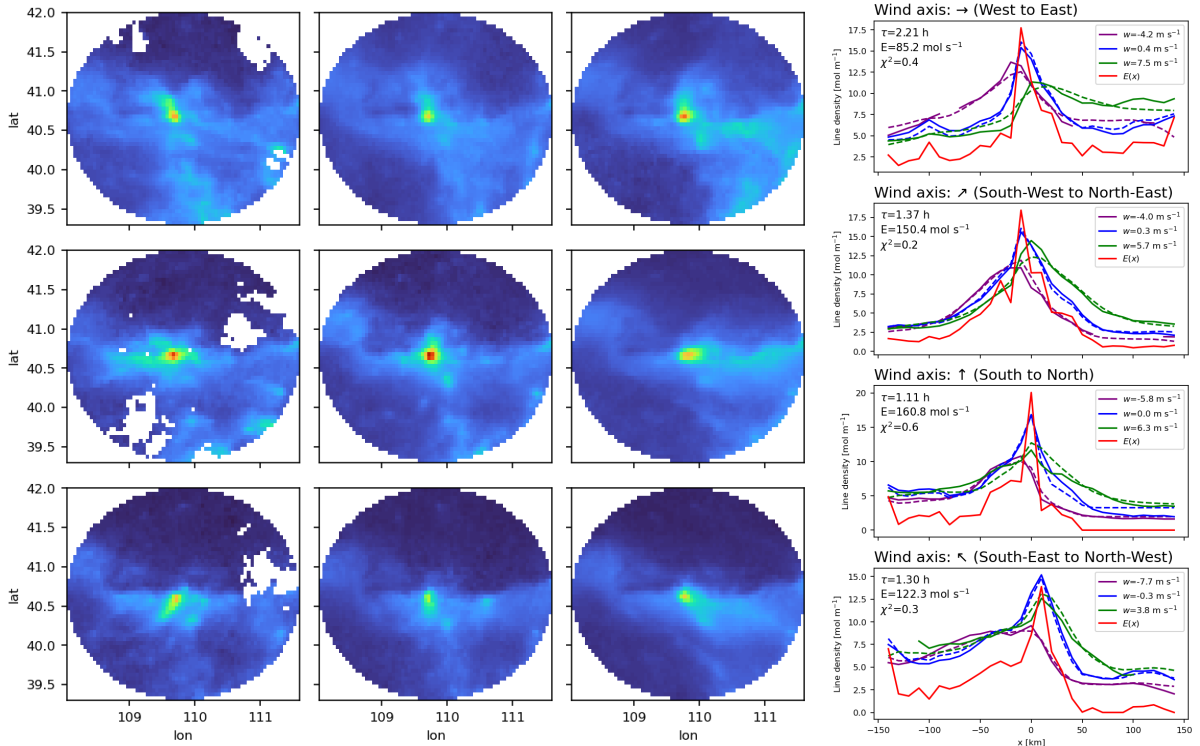

## 46.4 Autumn

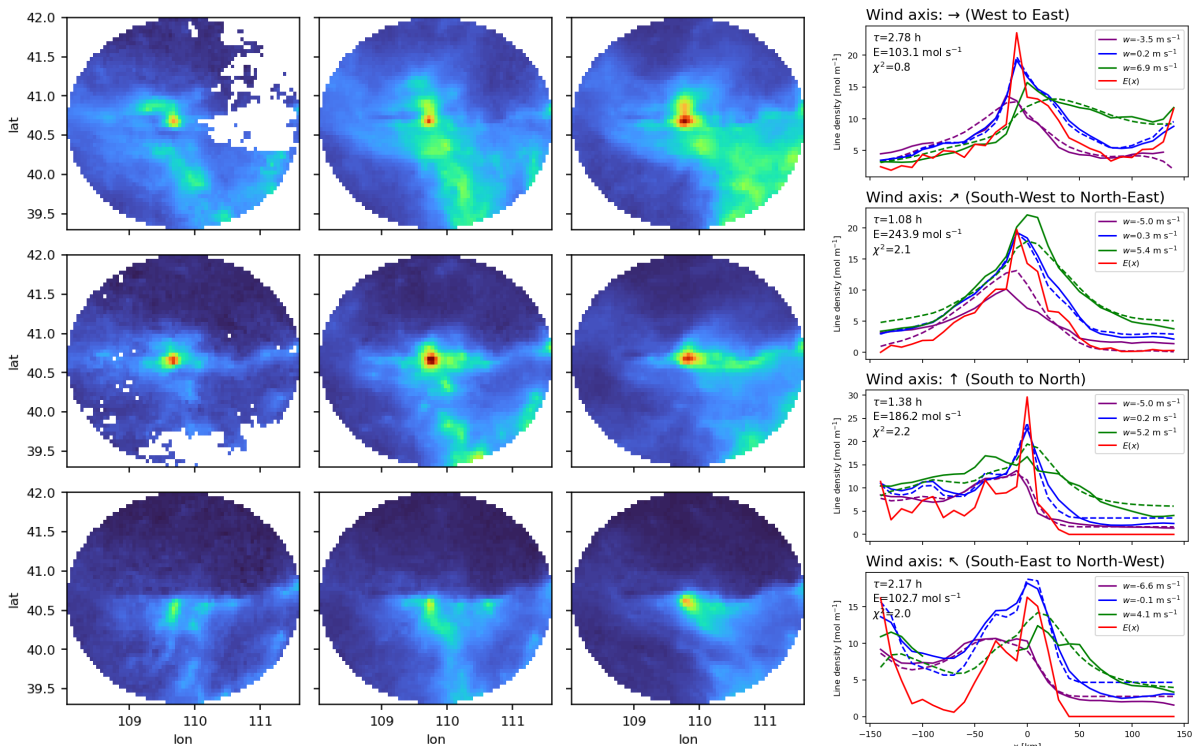

## 47 Brooklyn

### 47.1 Winter

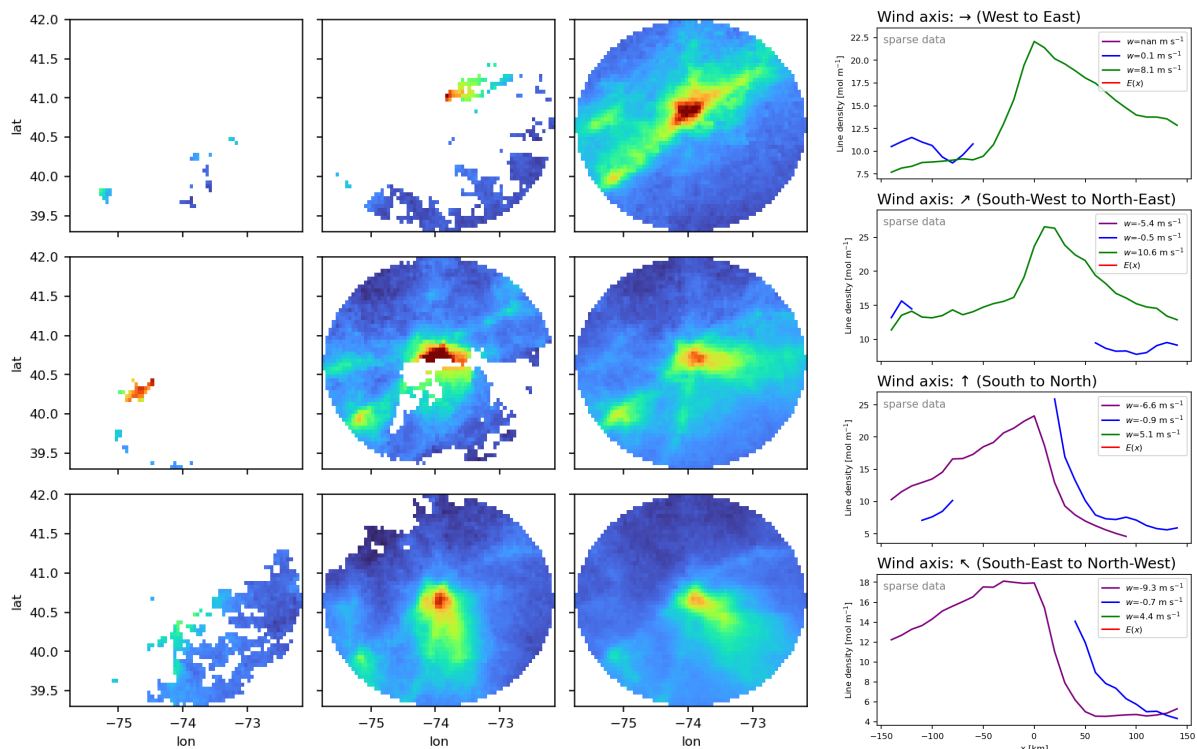

### 47.2 Spring

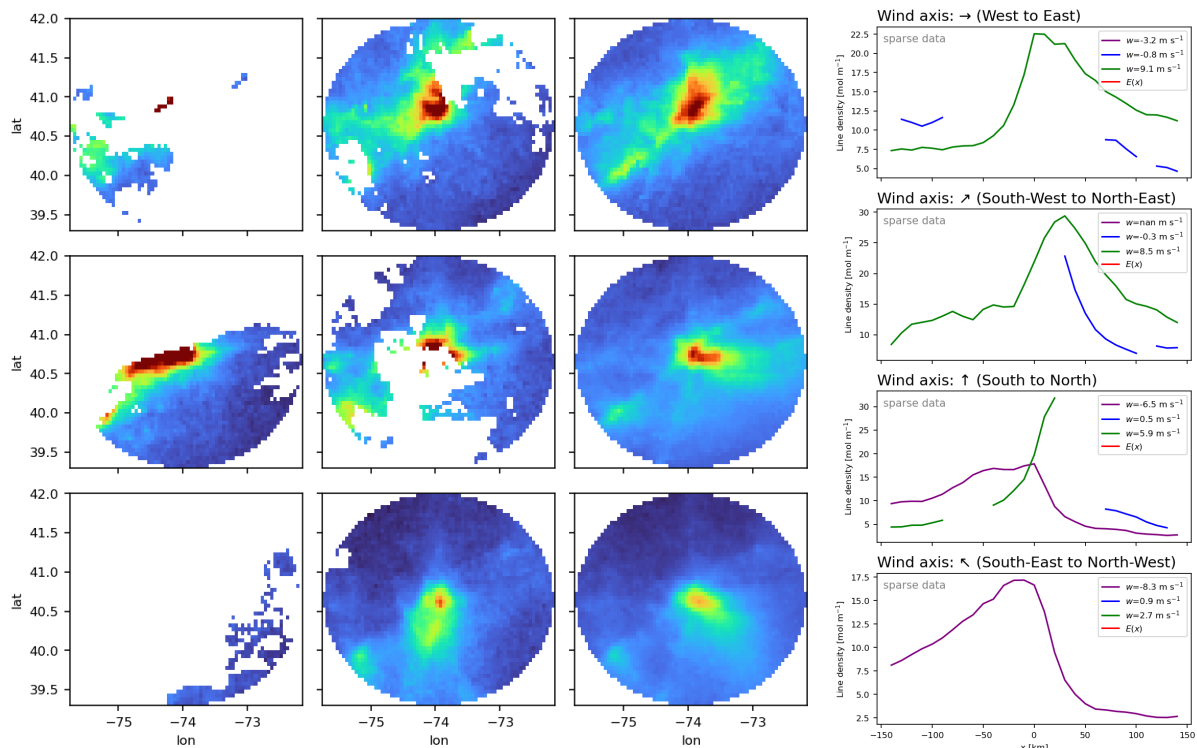

## 47.3 Summer

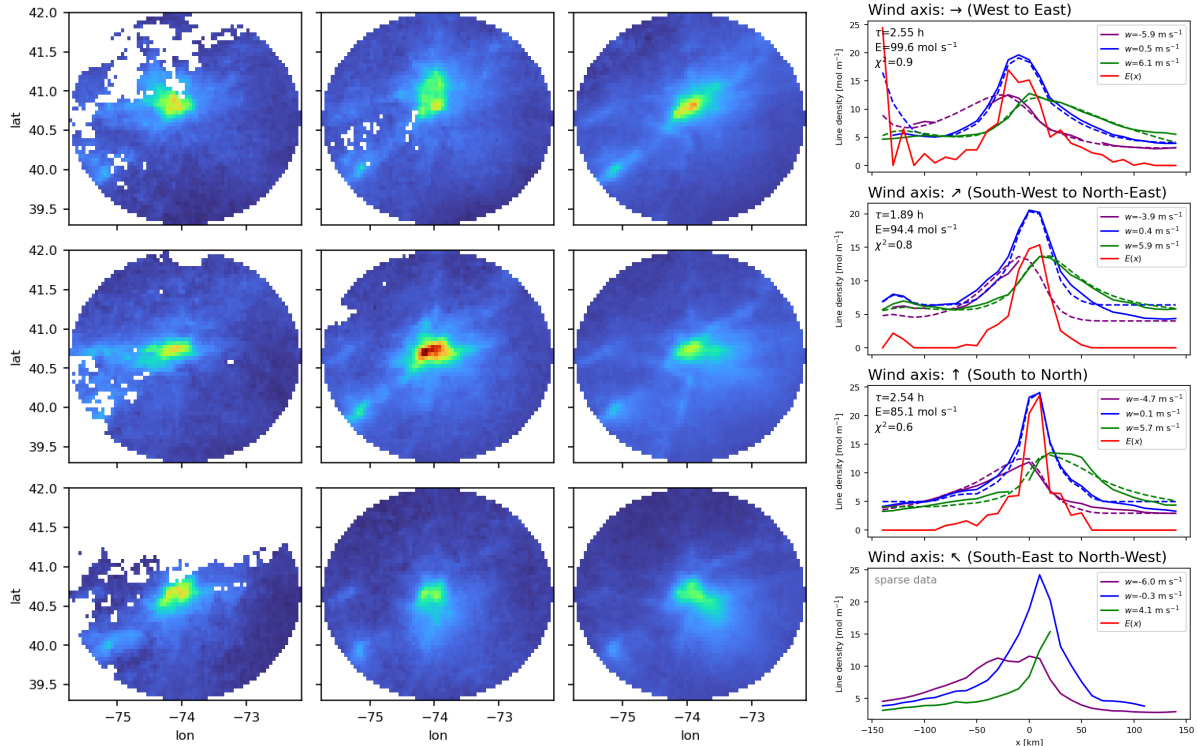

## 47.4 Autumn

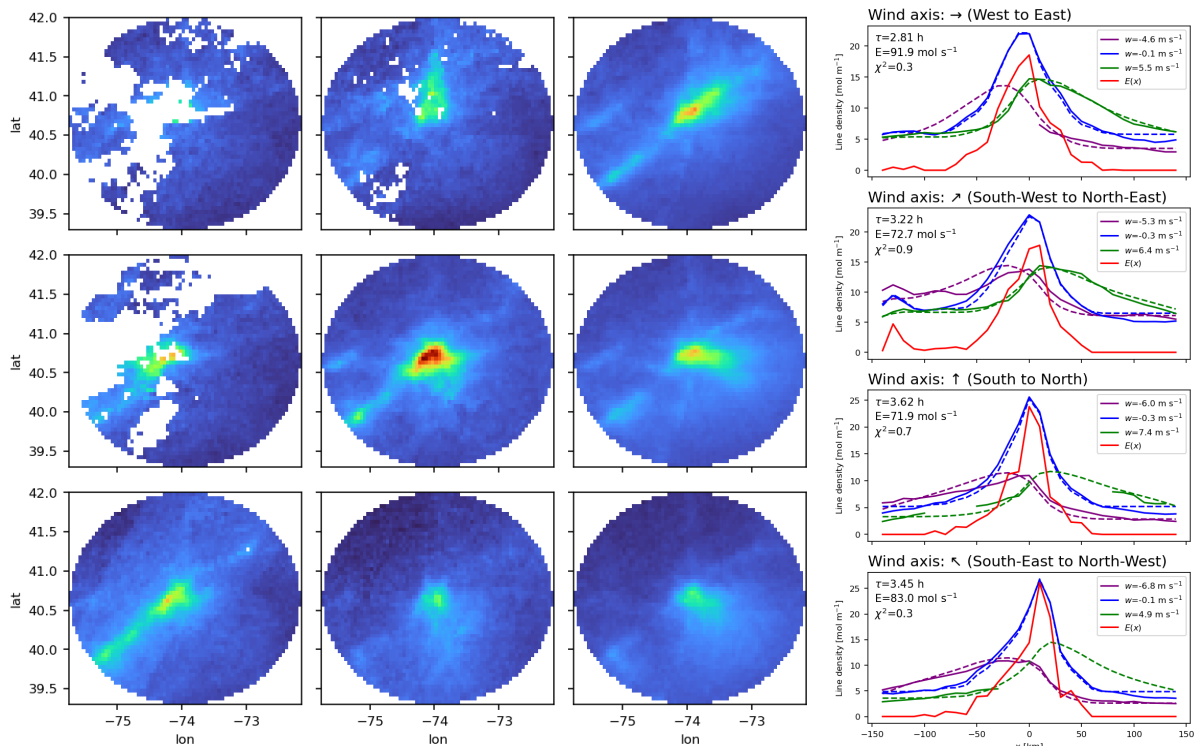



48.1 Winter

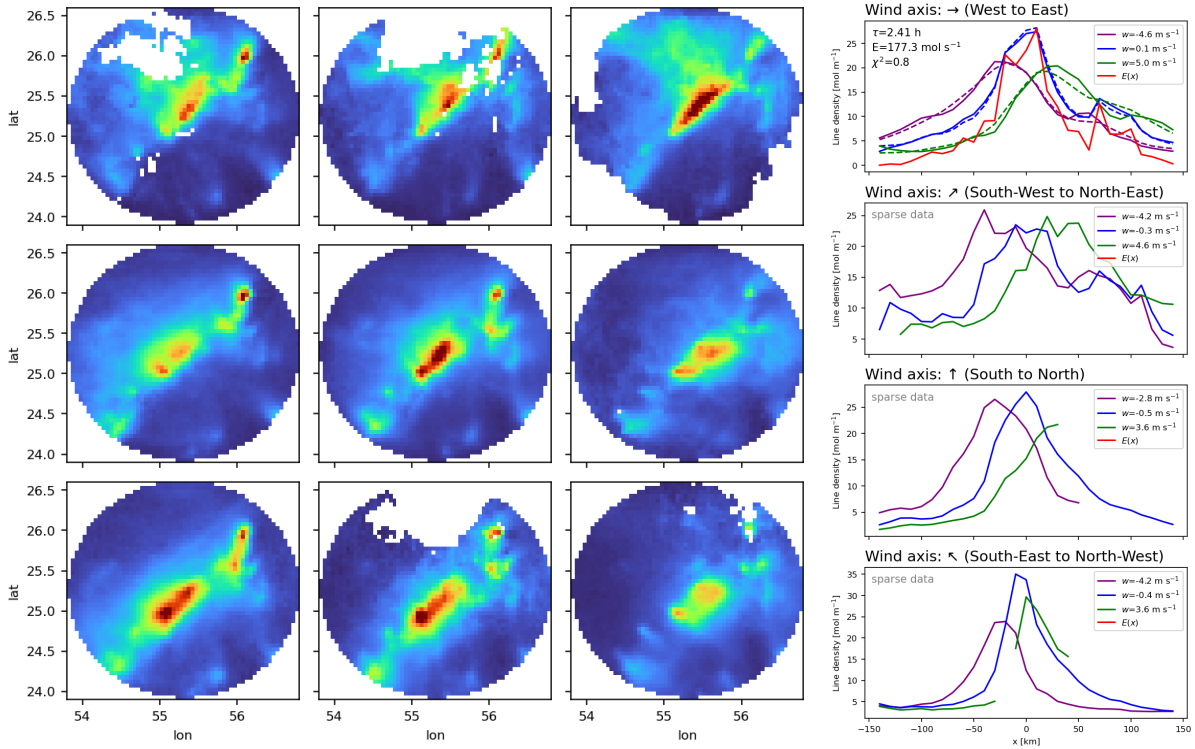

48.2 Spring

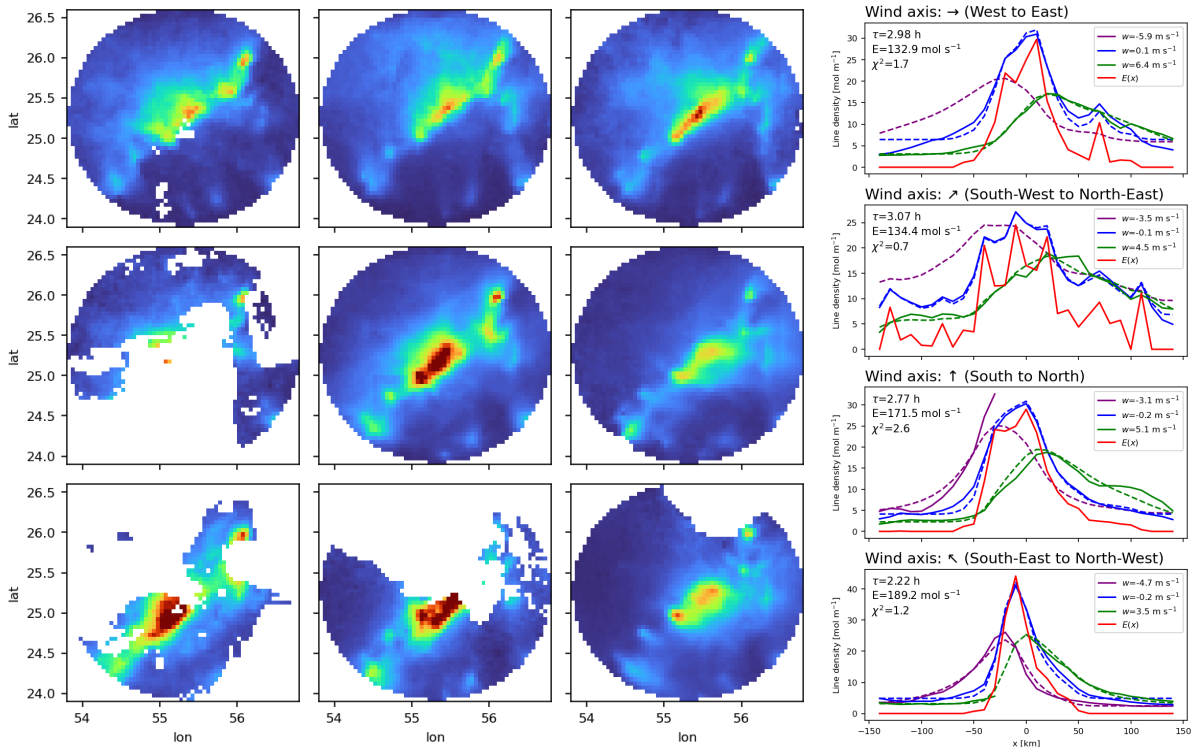

### 48.3 Summer

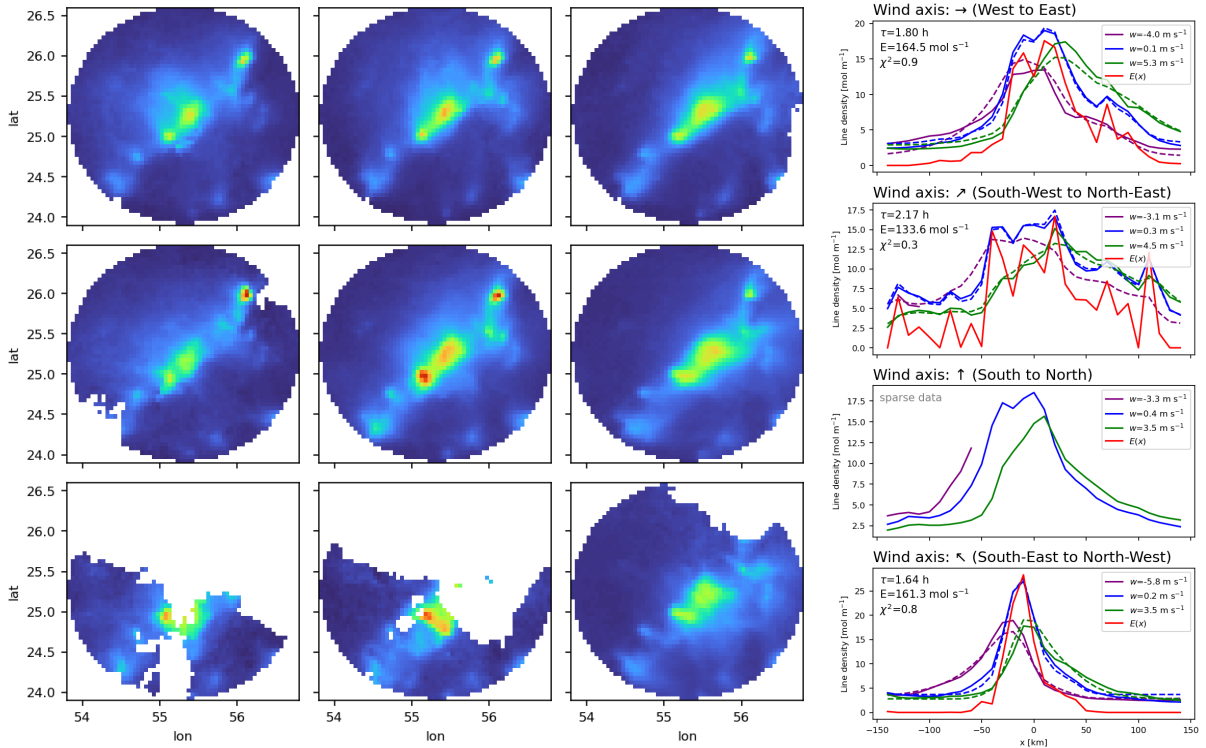

### 48.4 Autumn

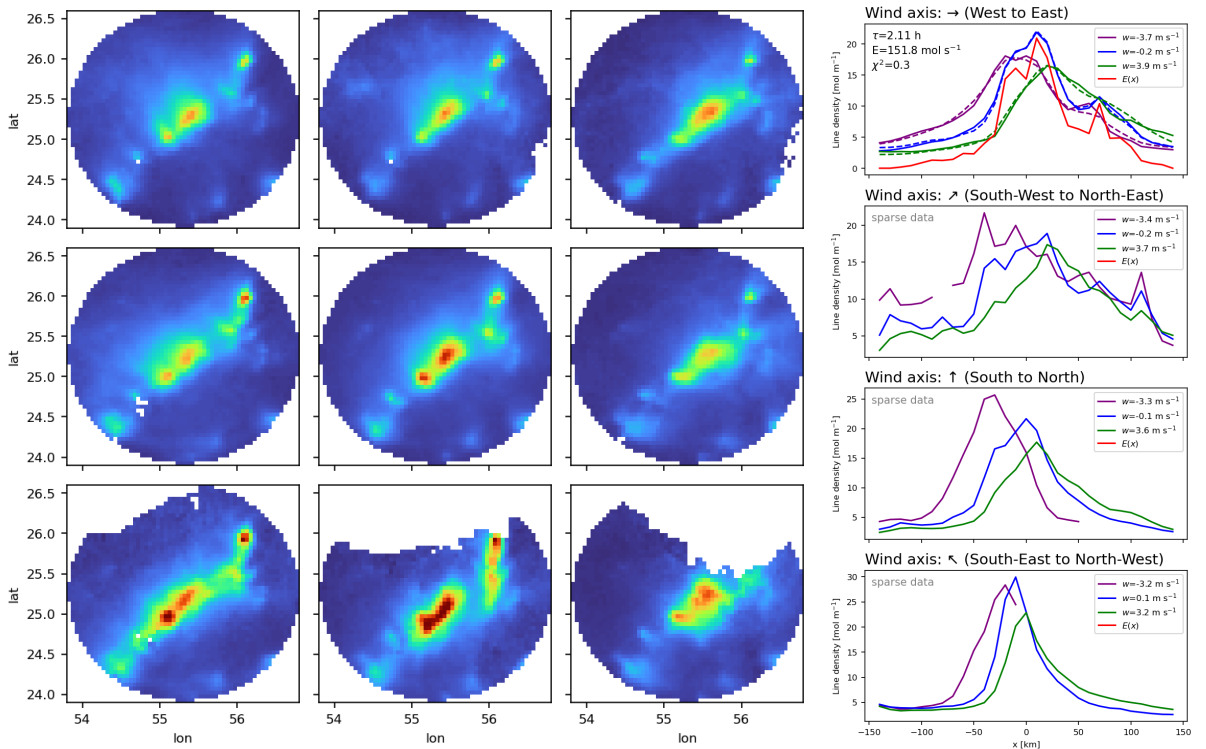

49.1 Winter

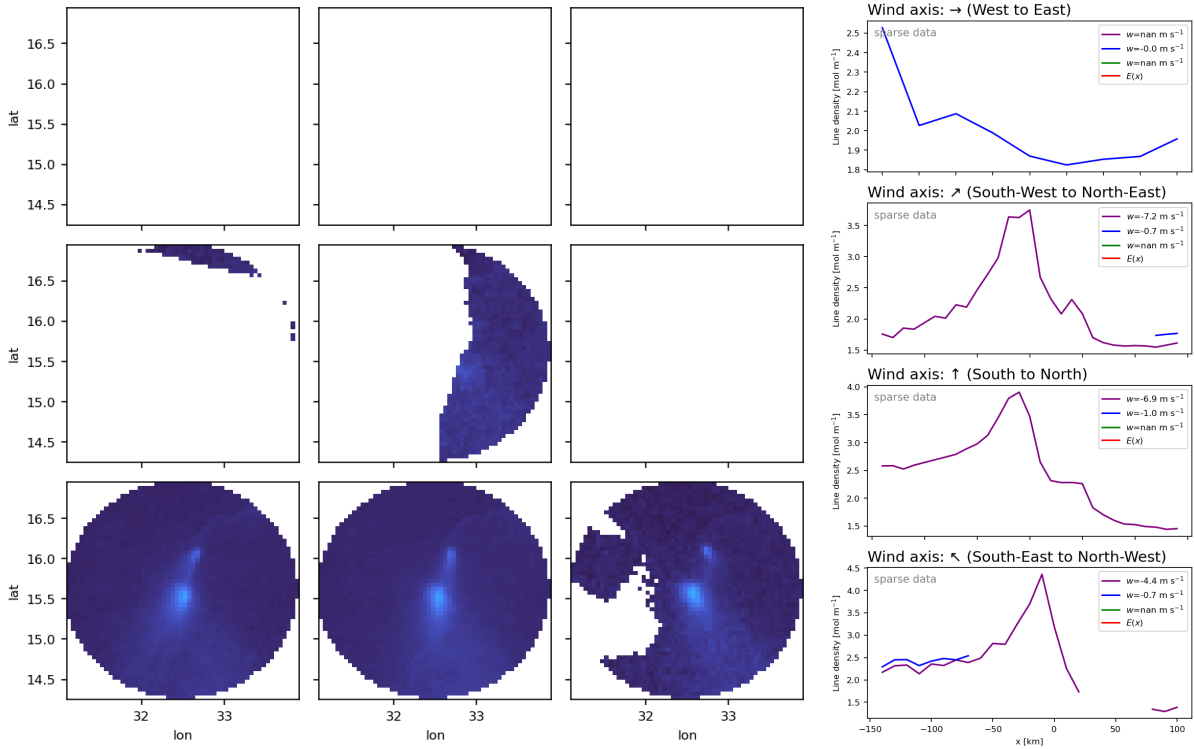

49.2 Spring

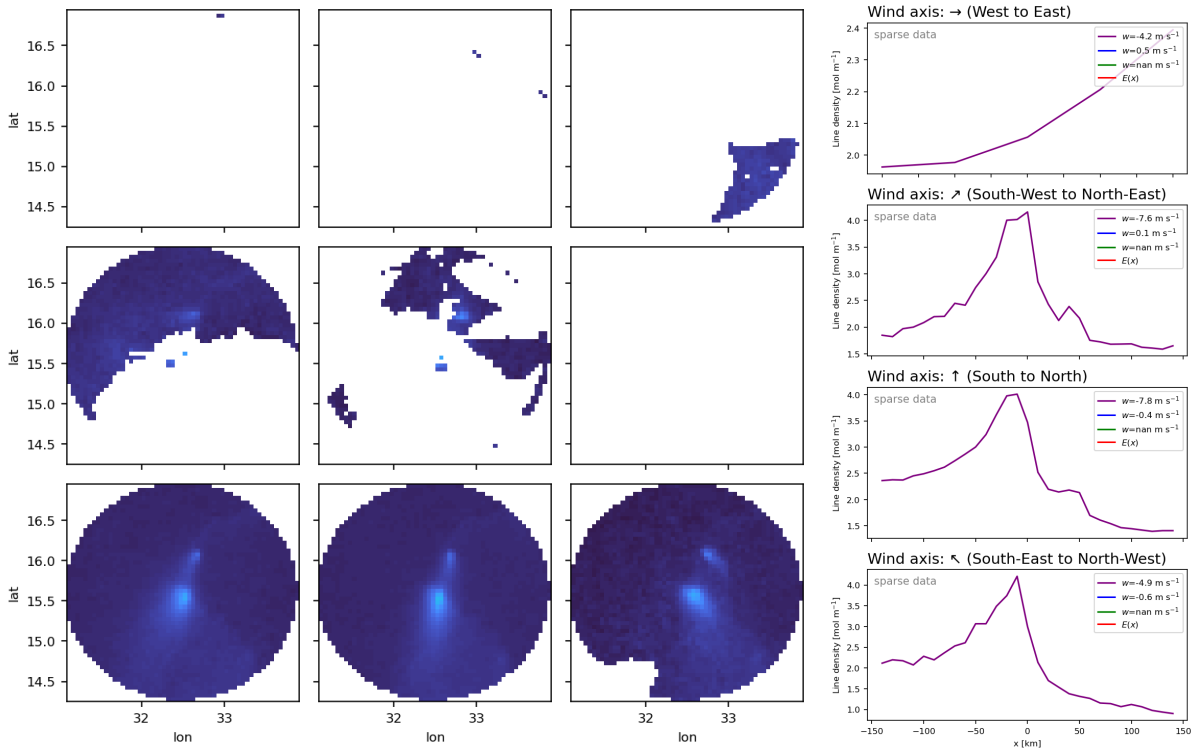

### 49.3 Summer

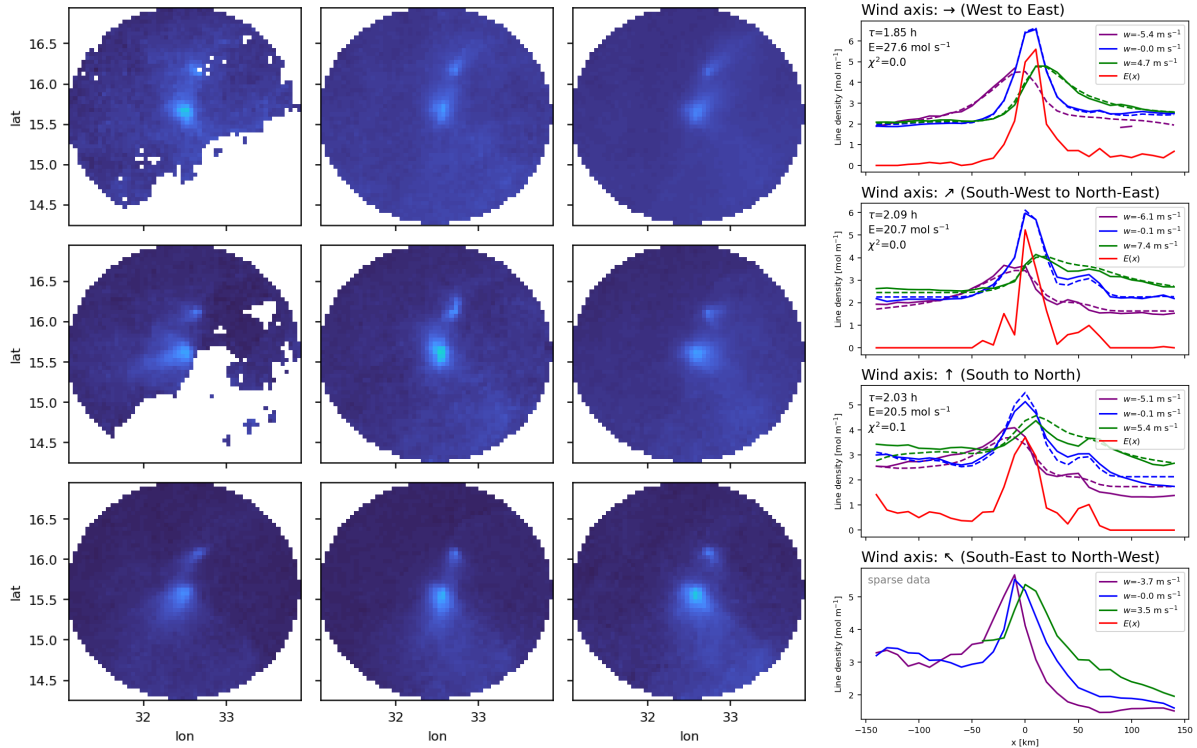

### 49.4 Autumn

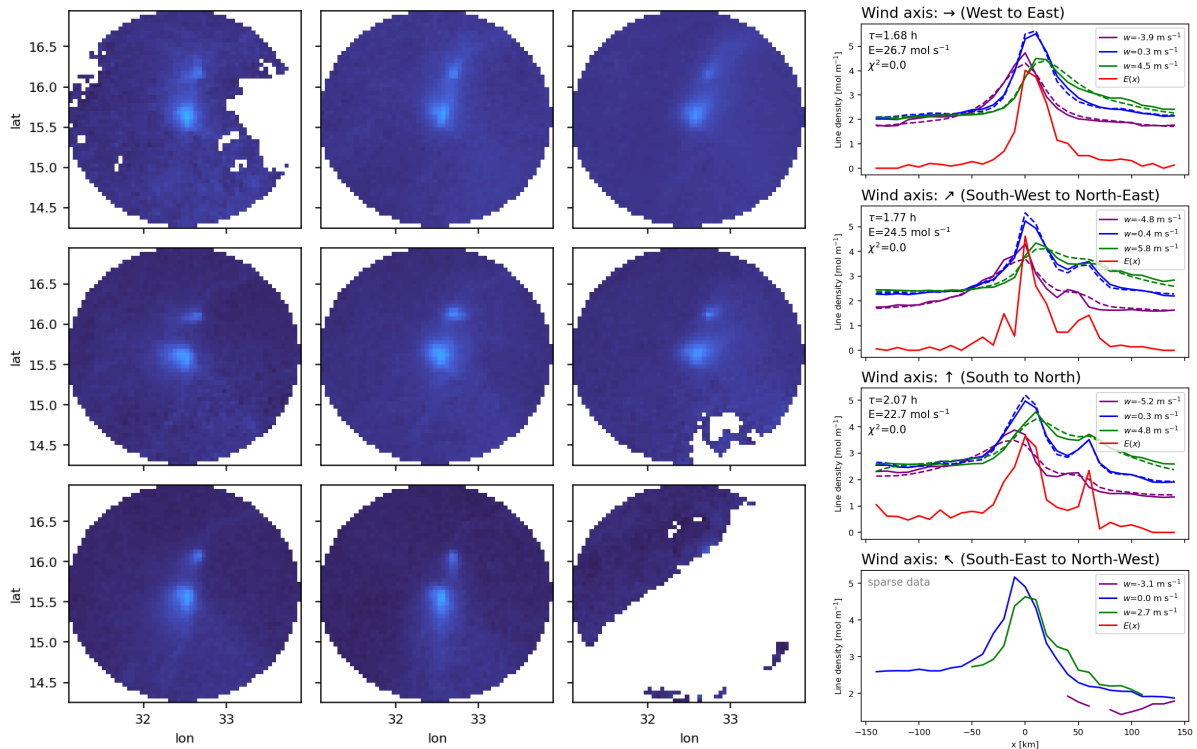

50.1 Winter

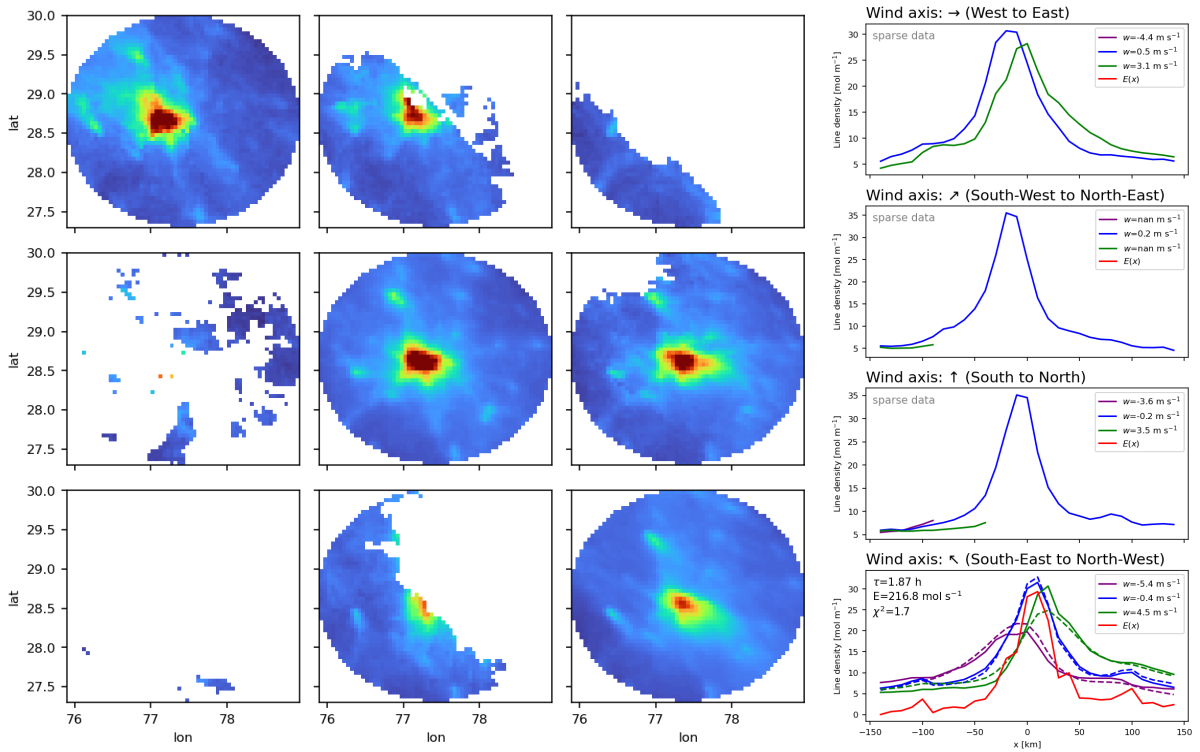

50.2 Spring

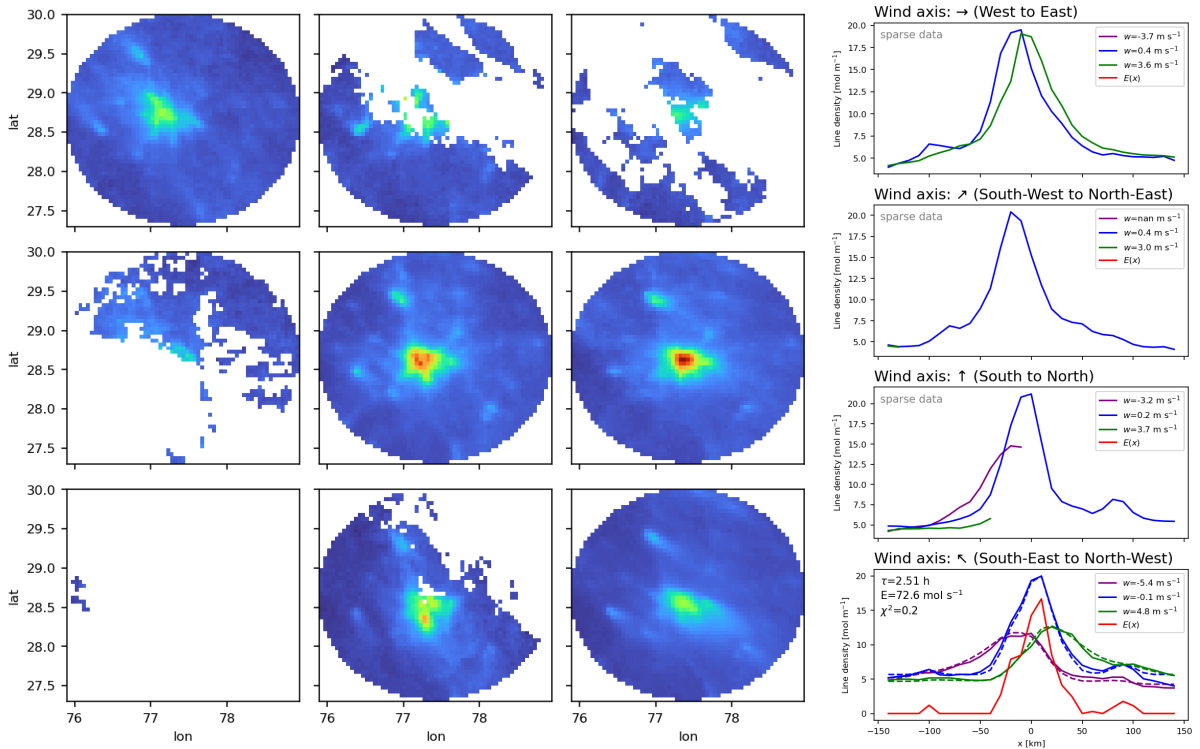

### 50.3 Summer

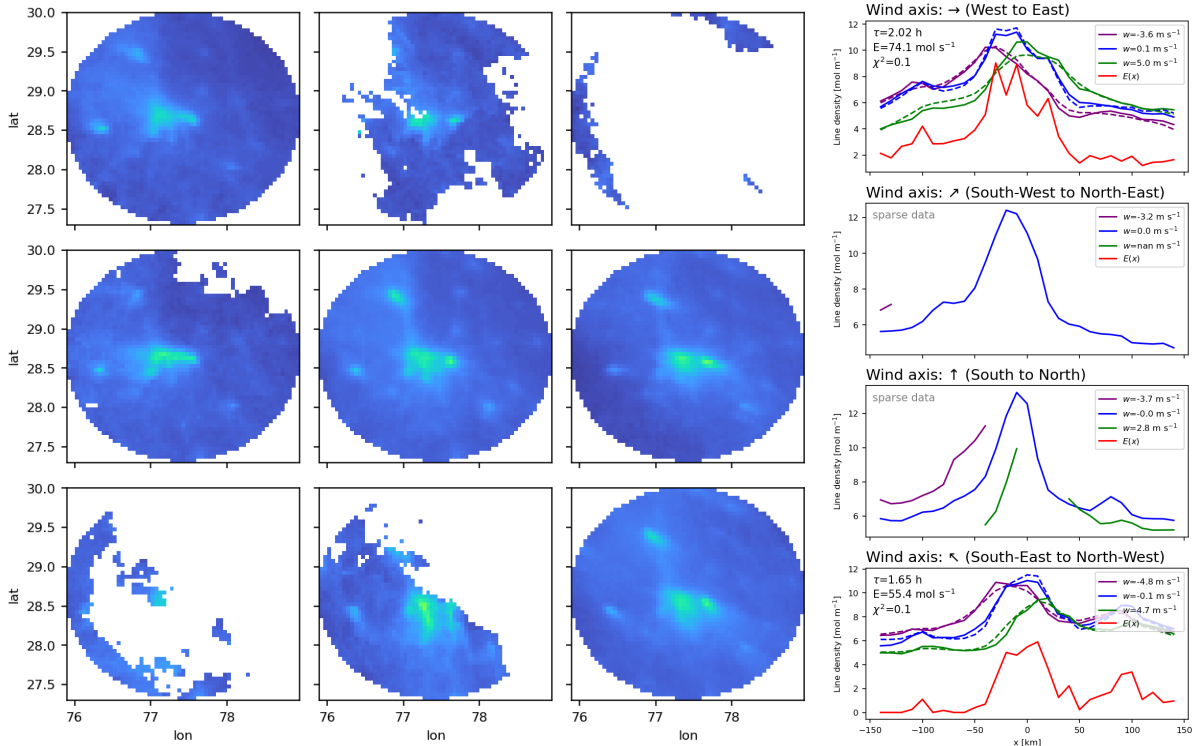

### 50.4 Autumn

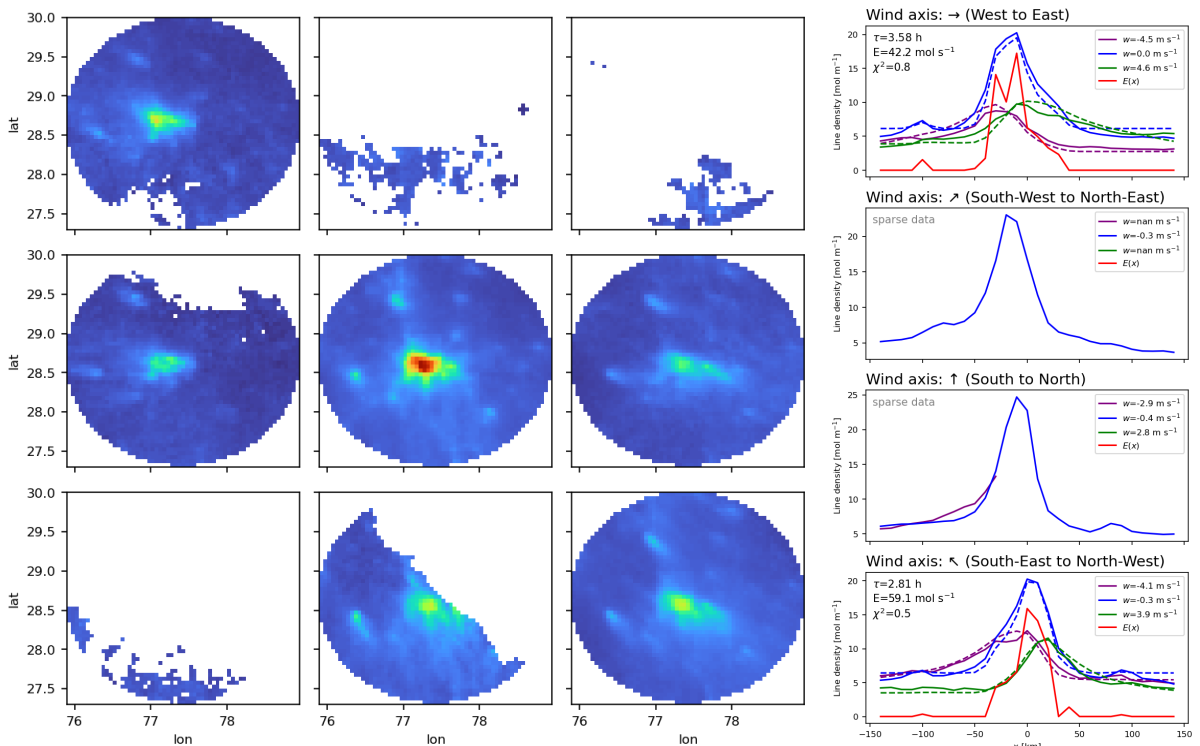

51.1 Winter

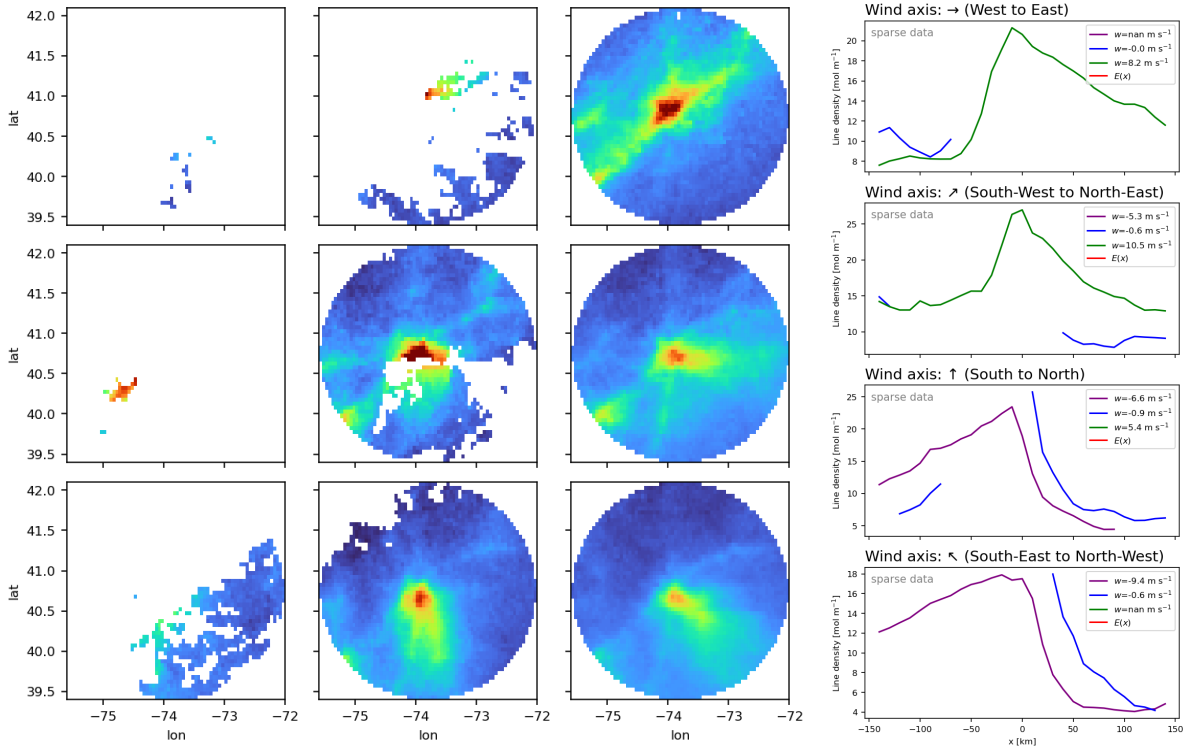

51.2 Spring

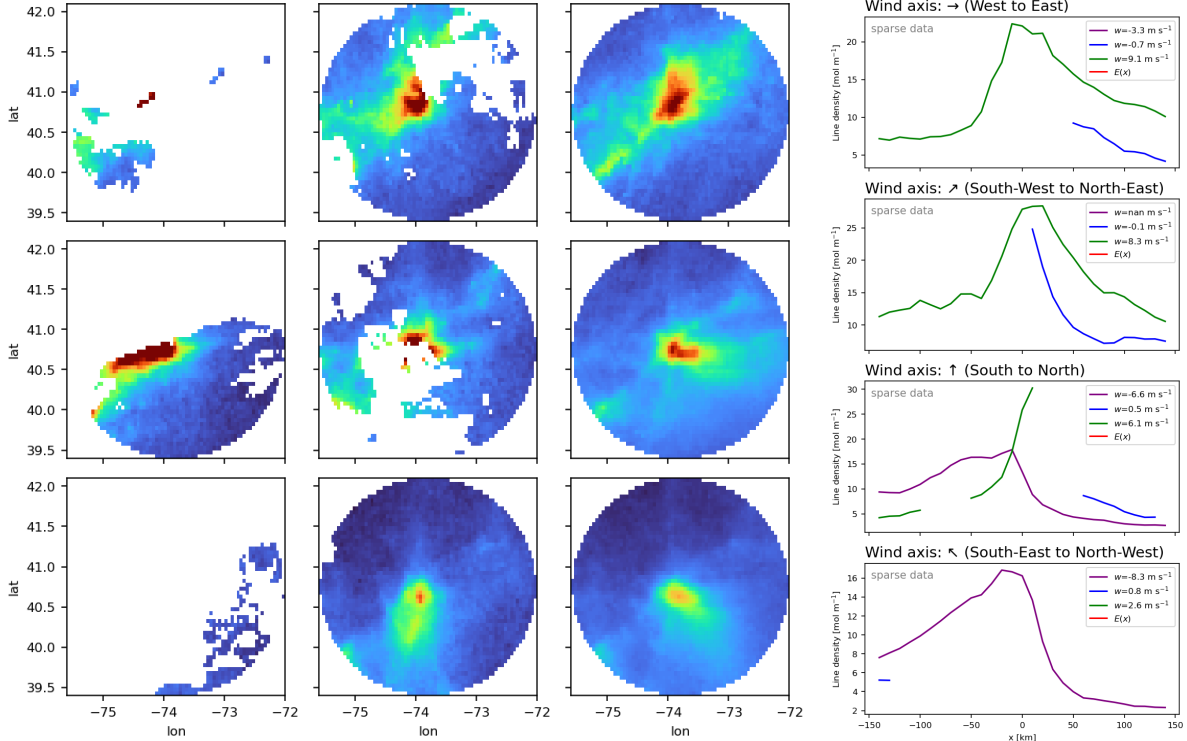

### 51.3 Summer

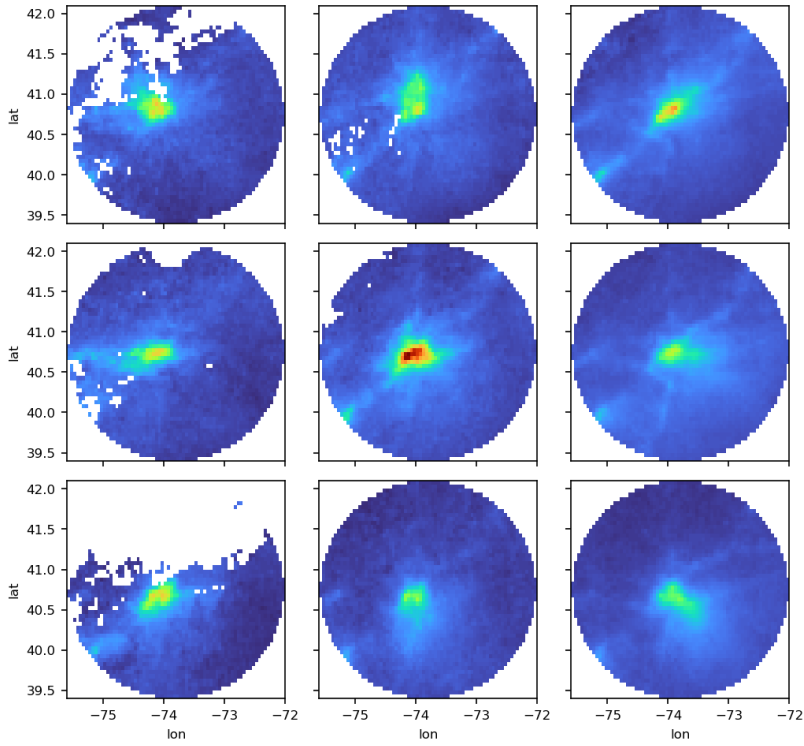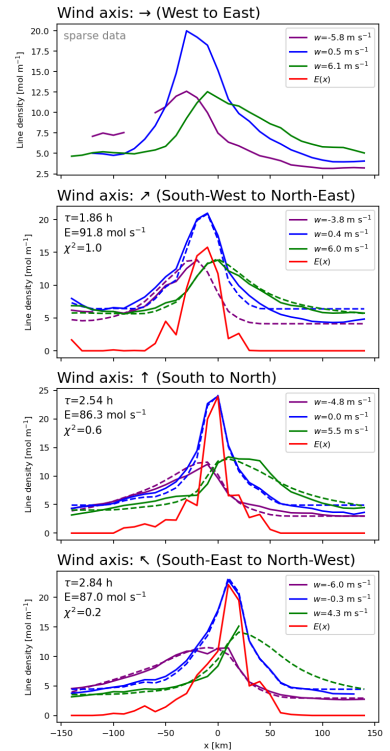

### 51.4 Autumn

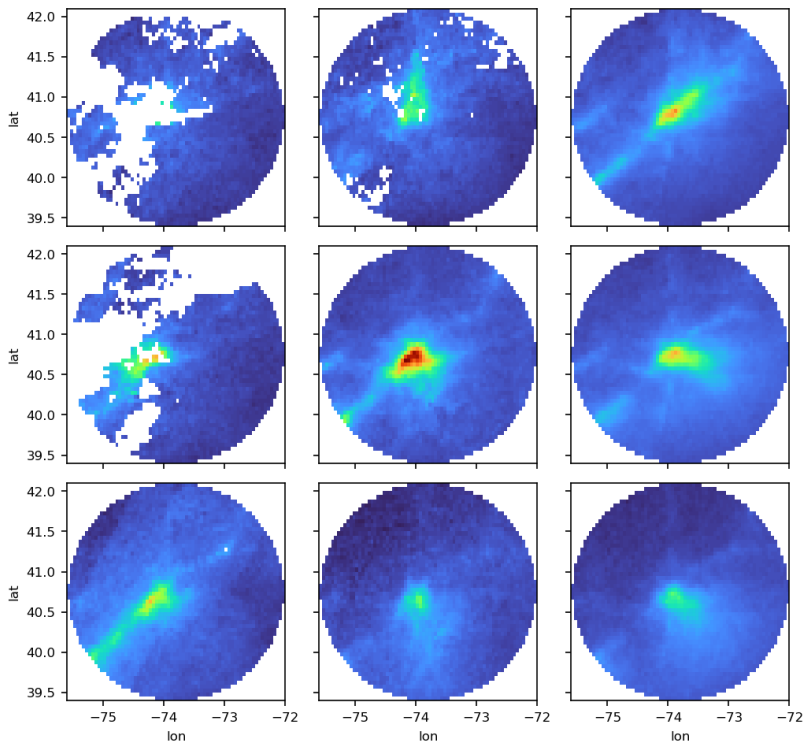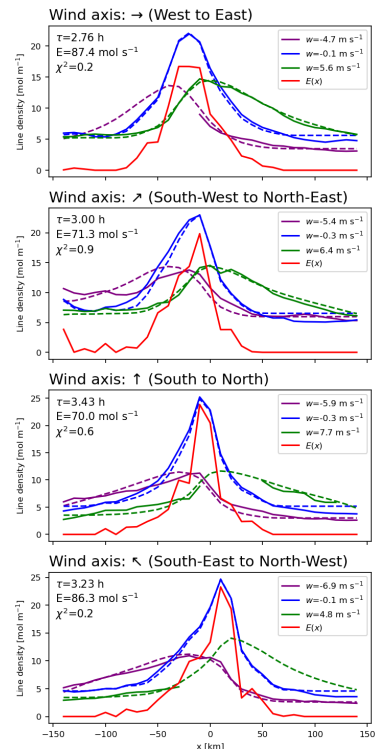



52.1 Winter

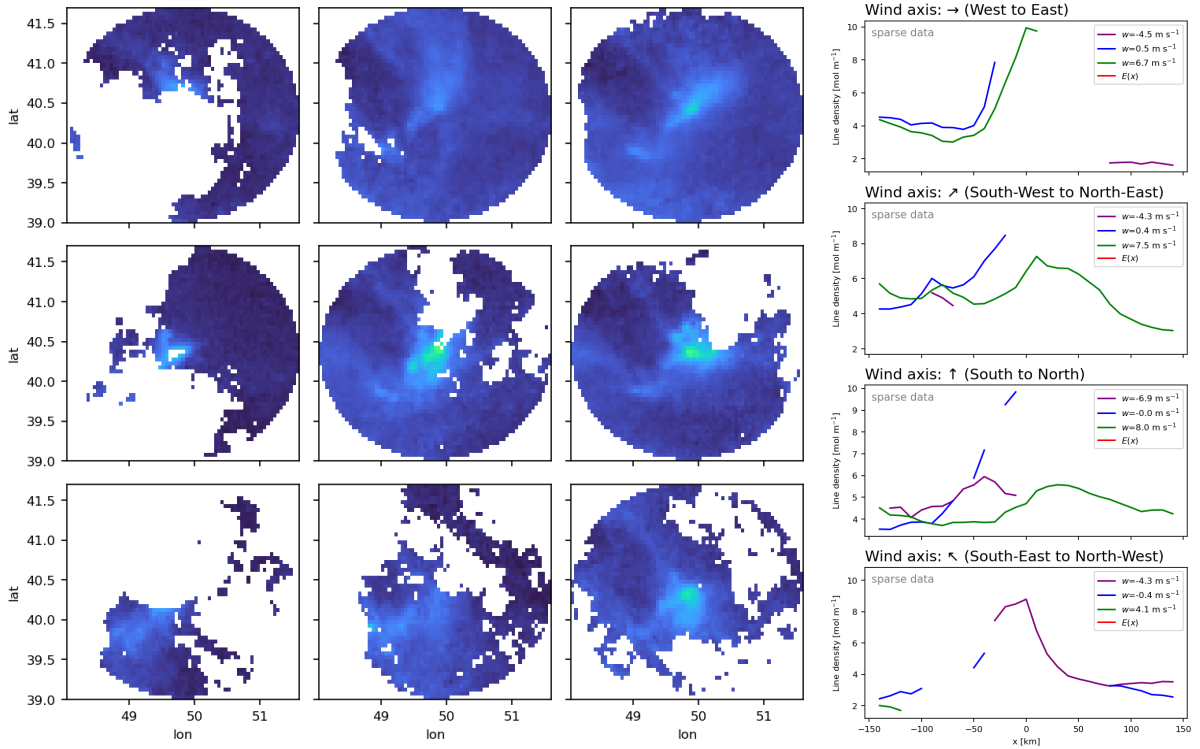

52.2 Spring

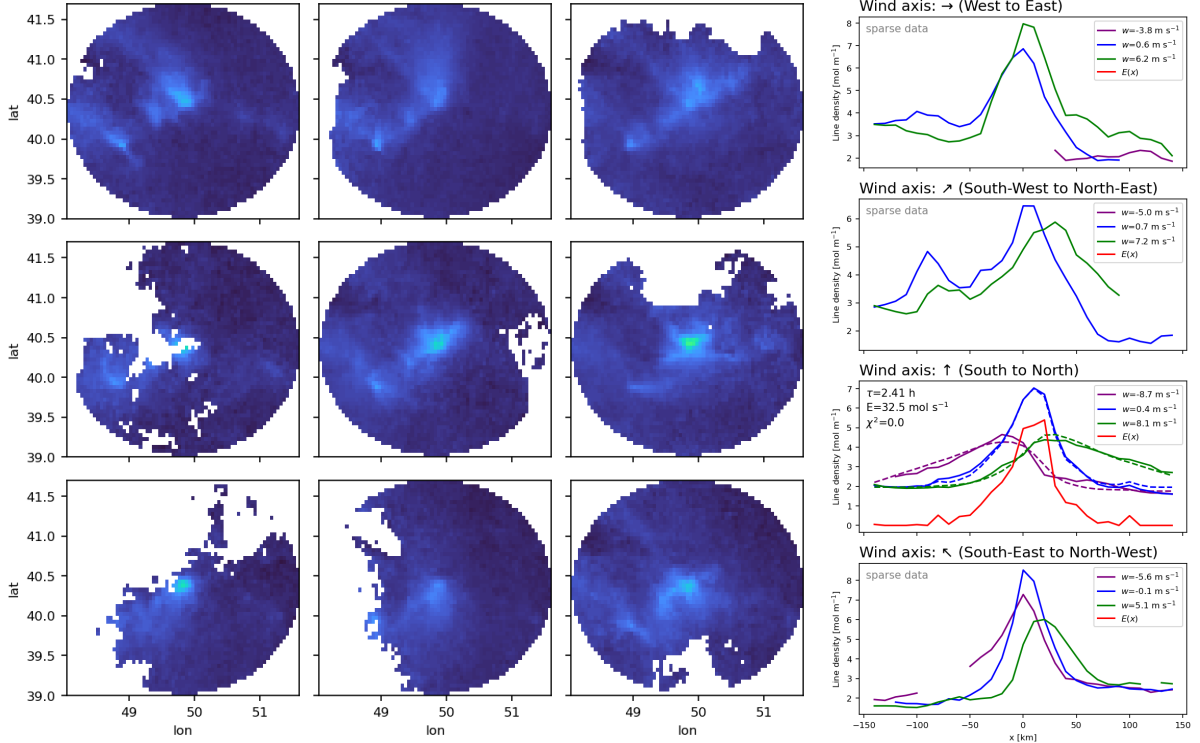

## 52.3 Summer

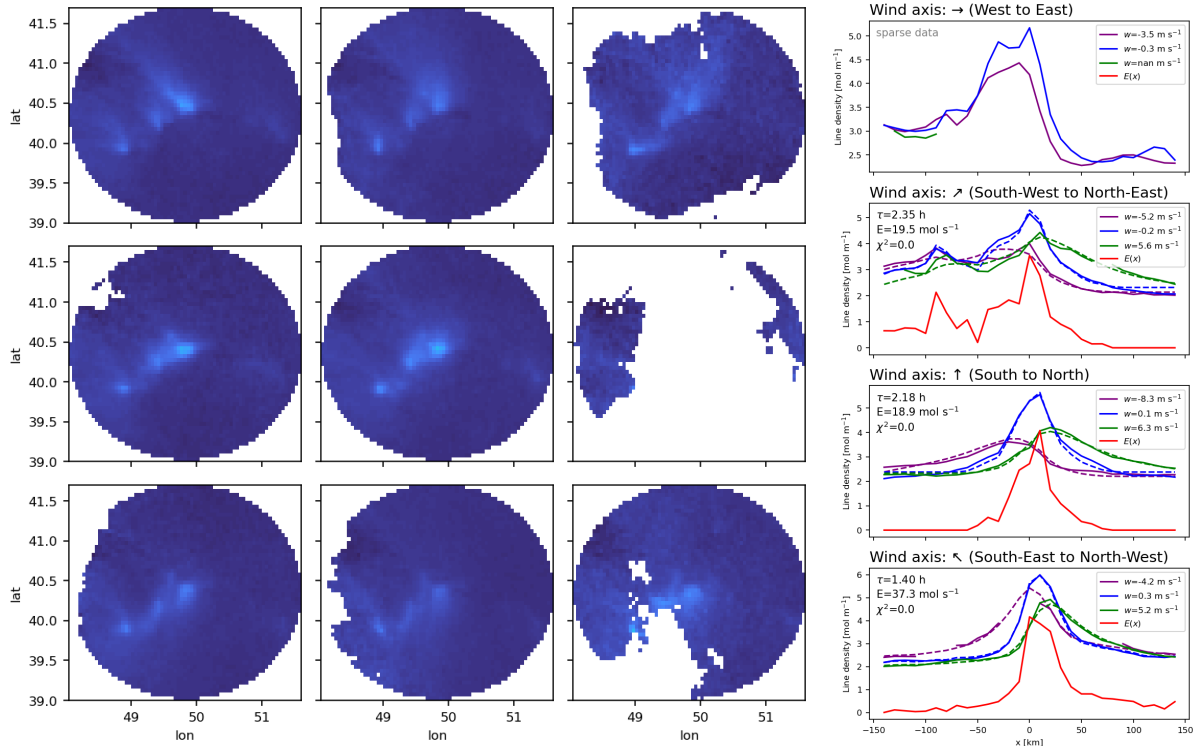

## 52.4 Autumn

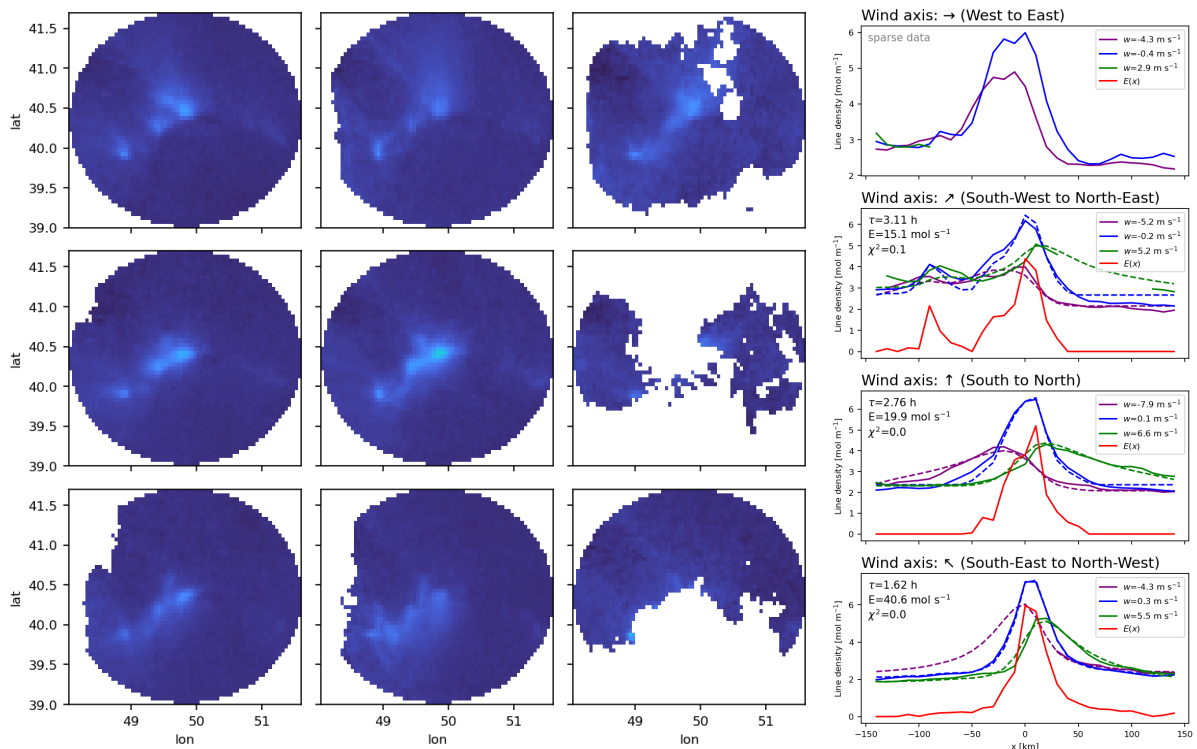

53.1 Winter

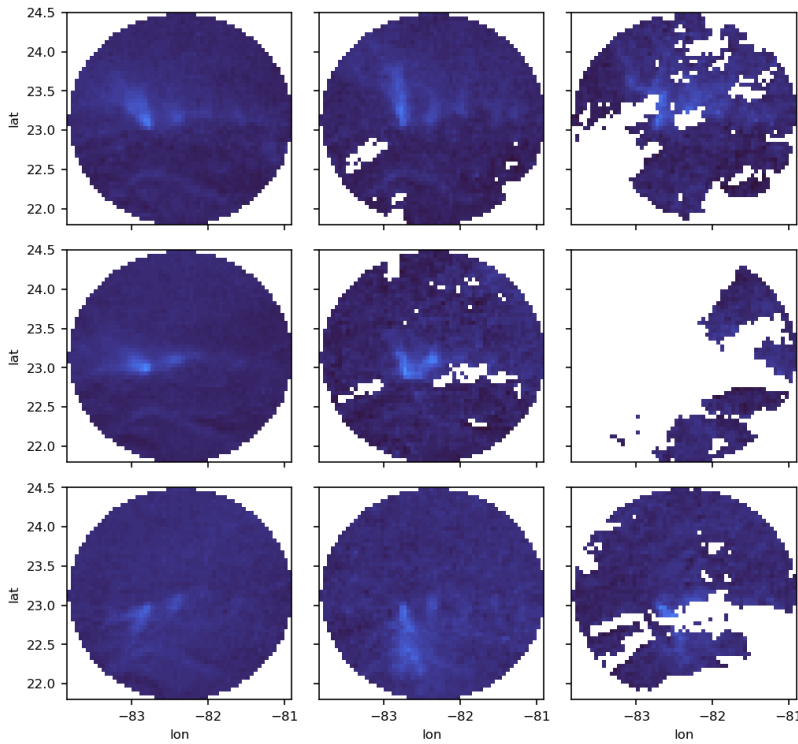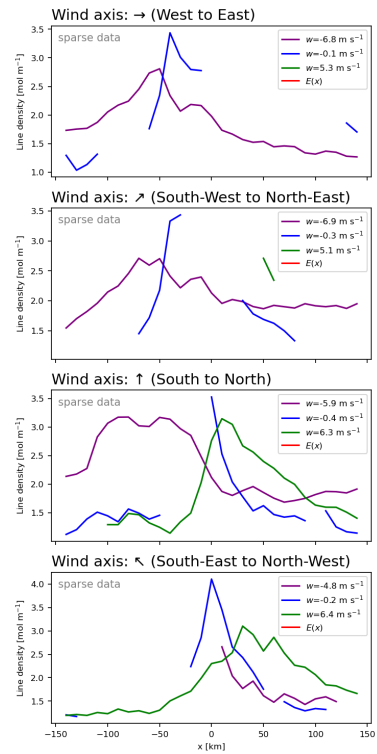

53.2 Spring

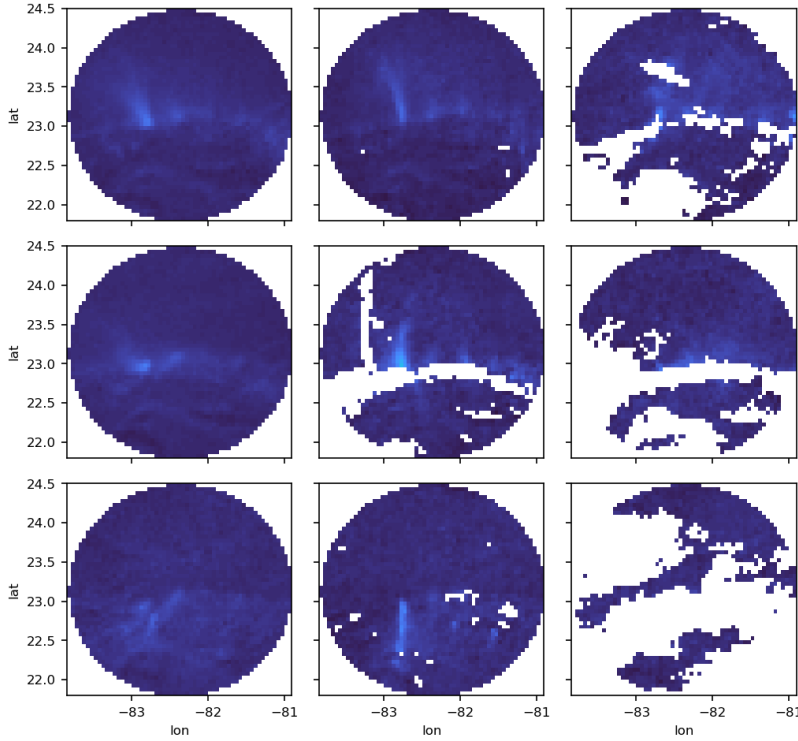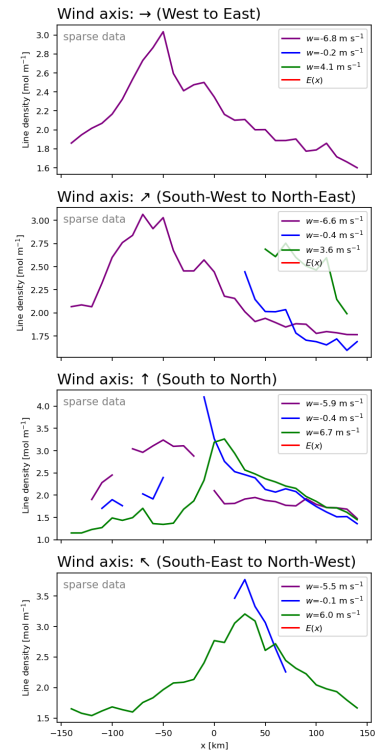

### 53.3 Summer

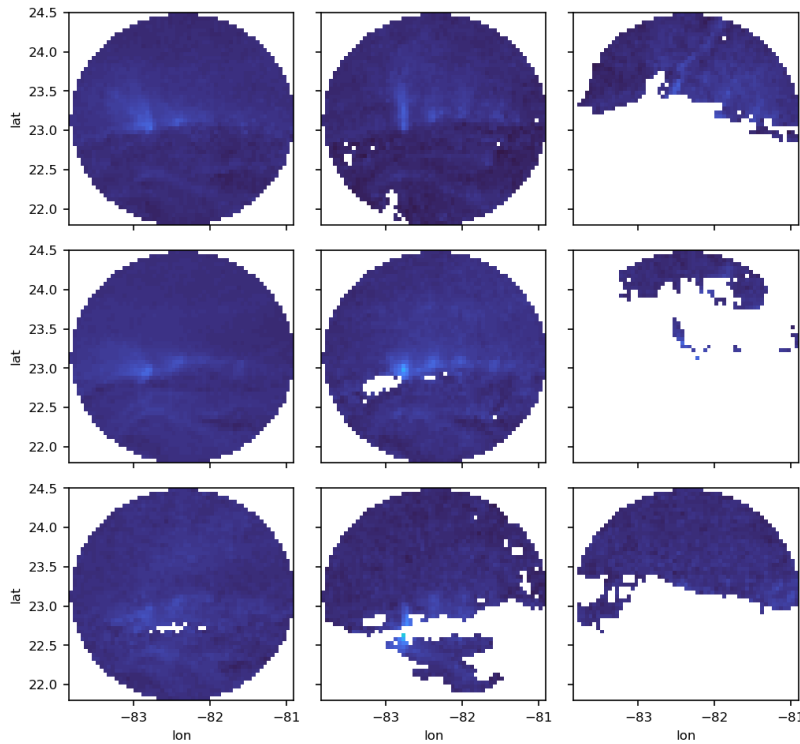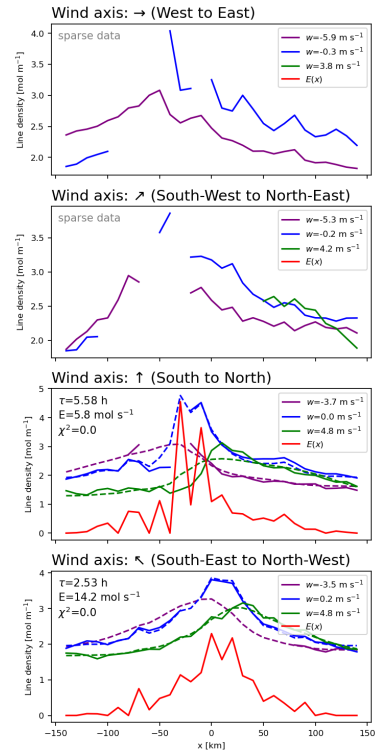

### 53.4 Autumn

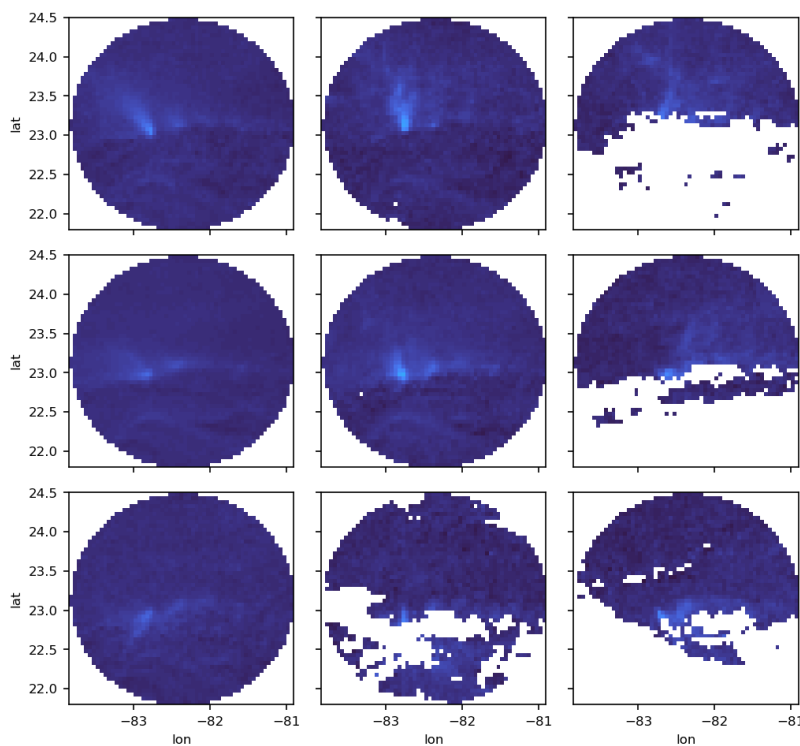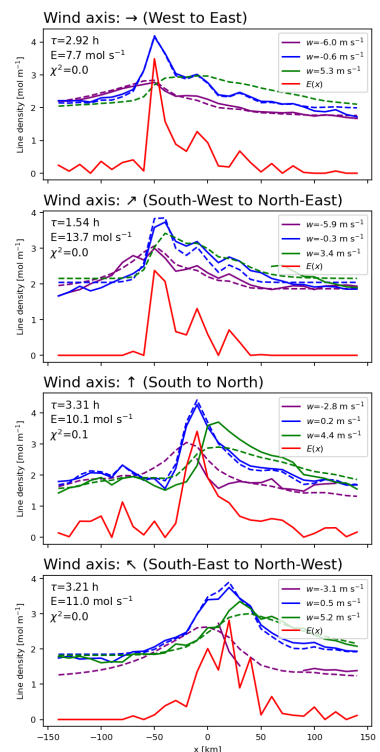

54.1 Winter

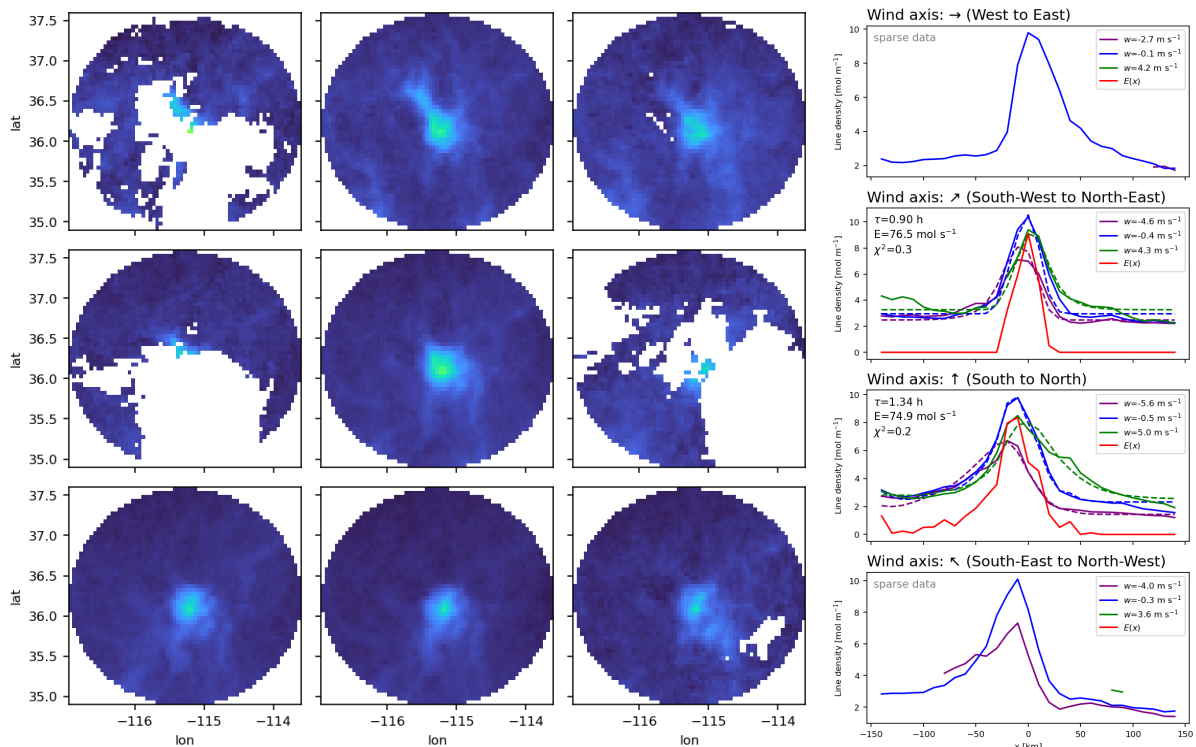

54.2 Spring

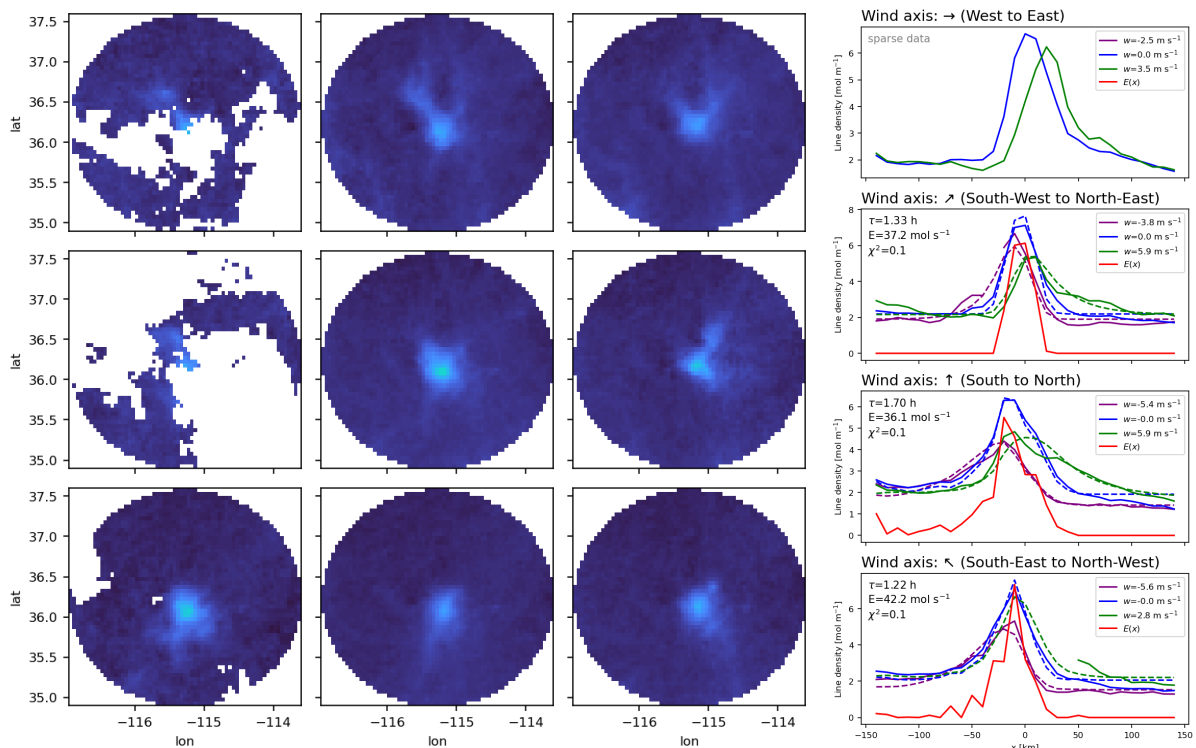

### 54.3 Summer

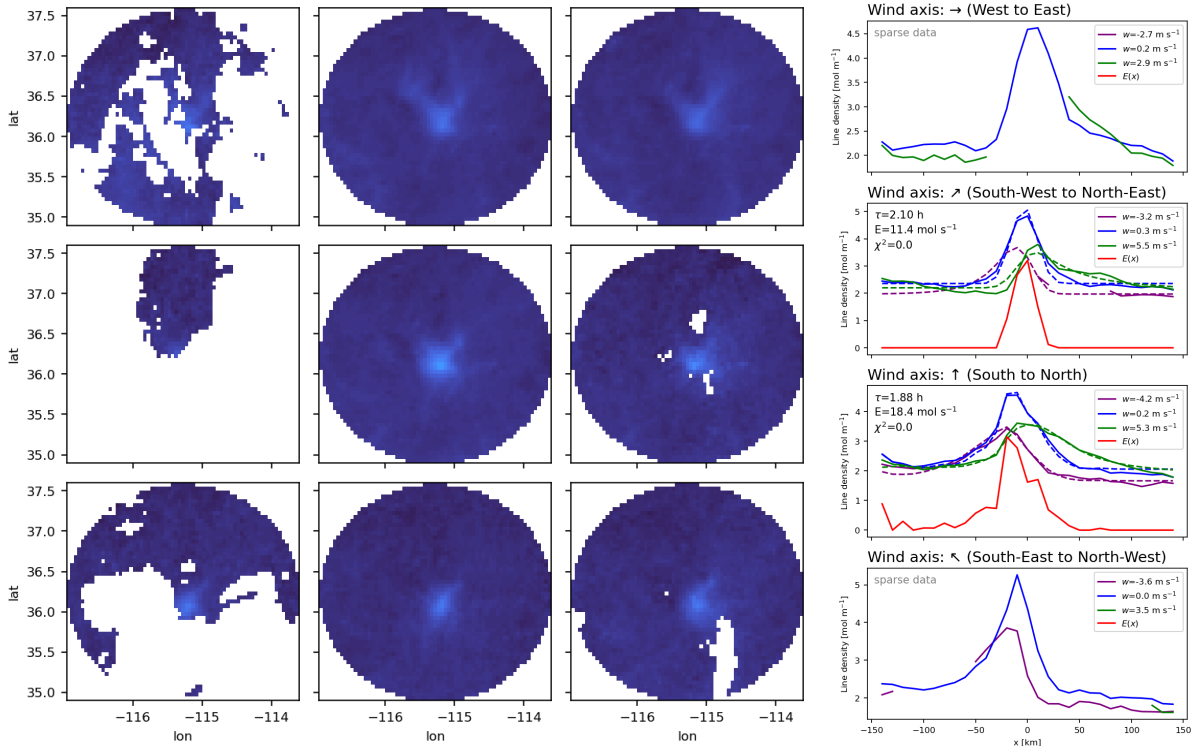

### 54.4 Autumn

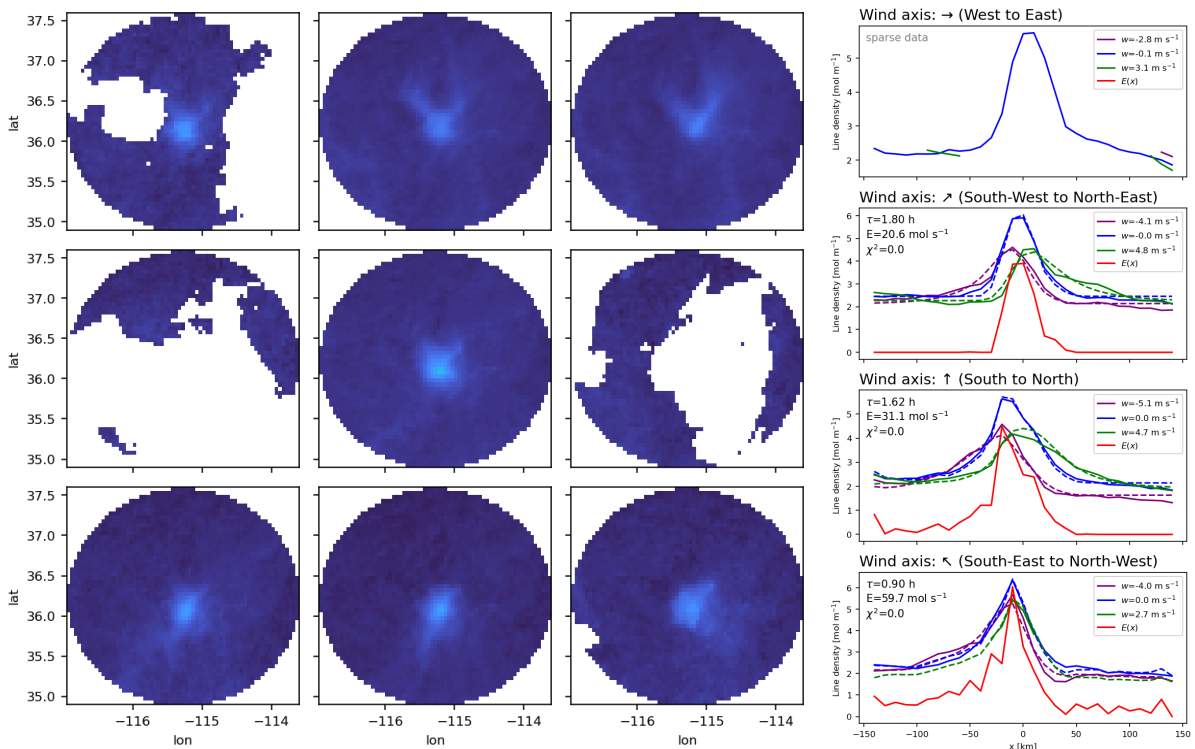

55.1 Winter

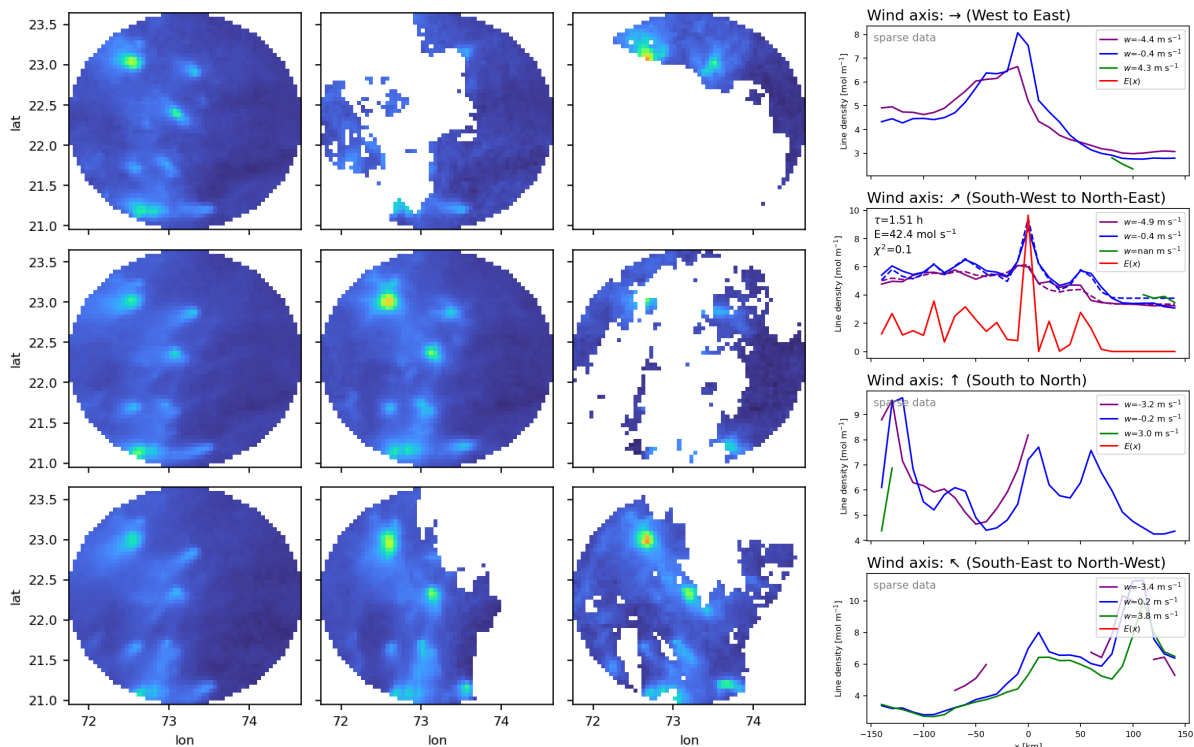

55.2 Spring

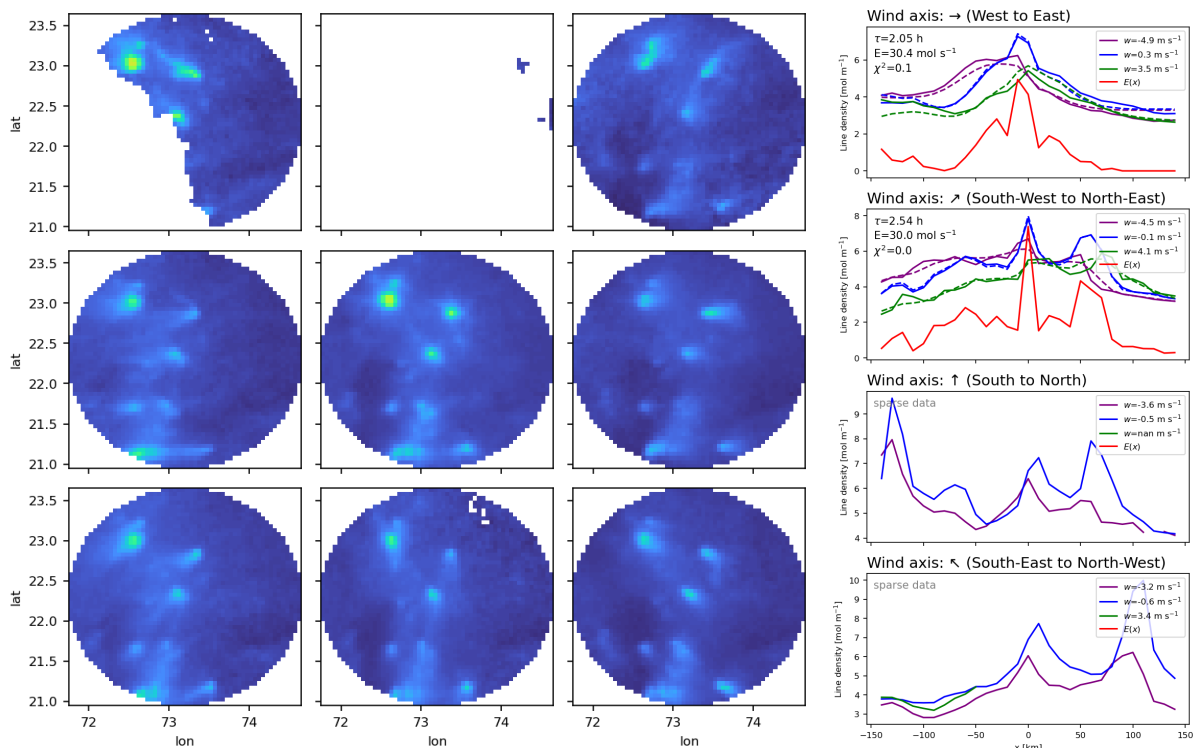

### 55.3 Summer

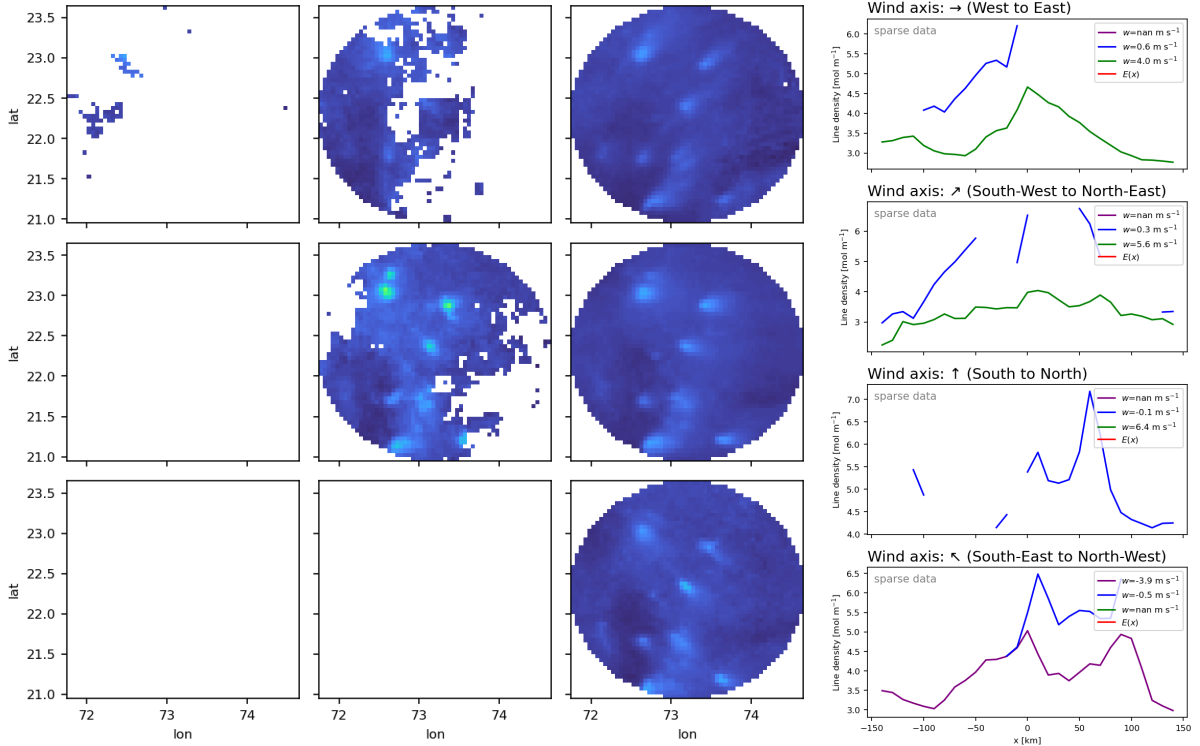

### 55.4 Autumn

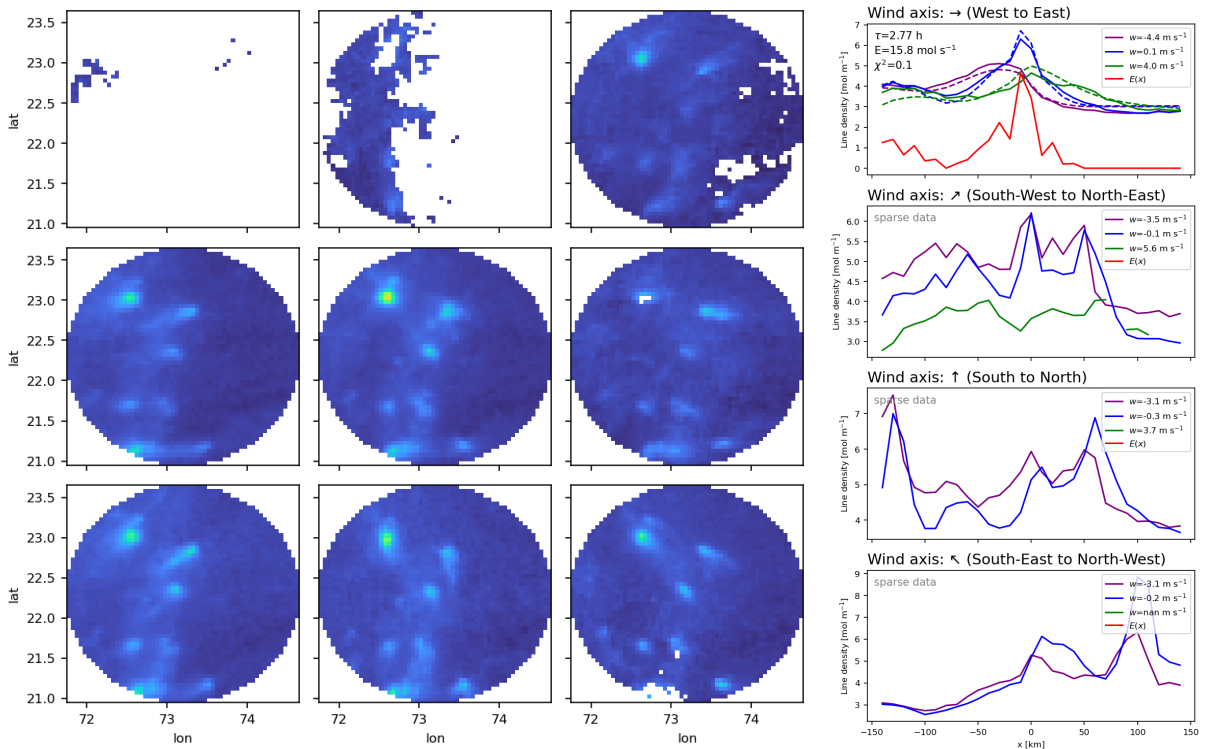



56.1 Winter

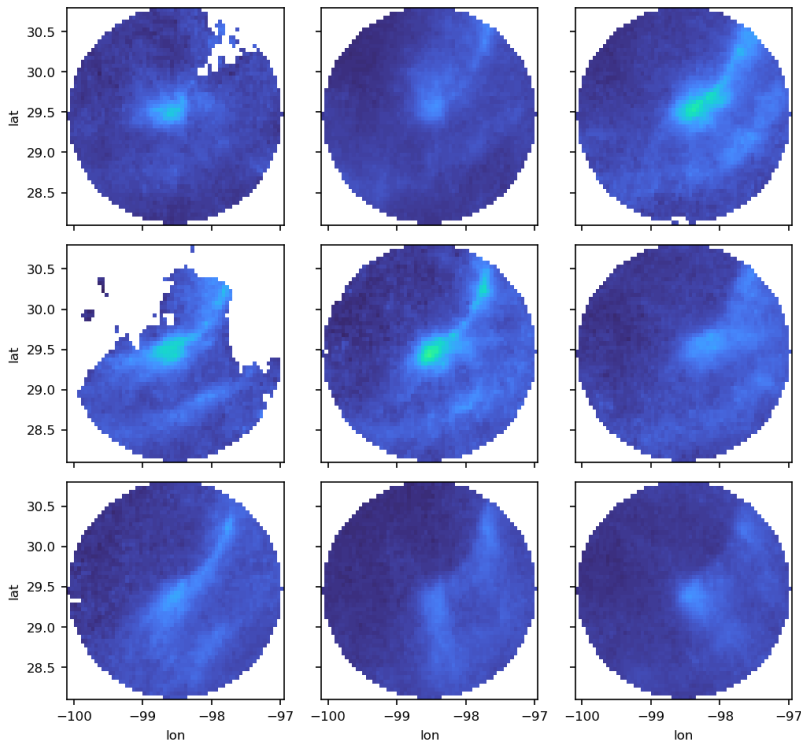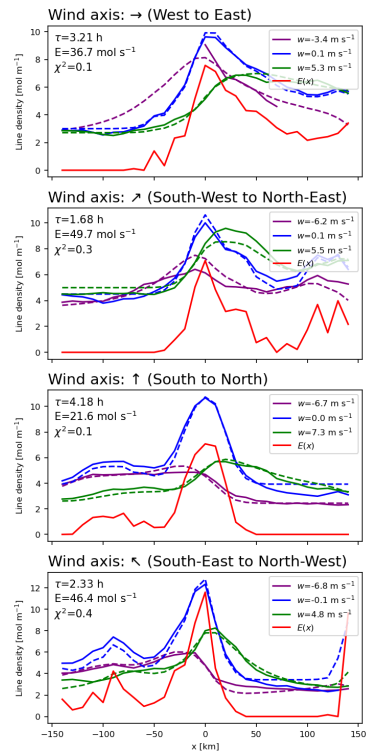

56.2 Spring

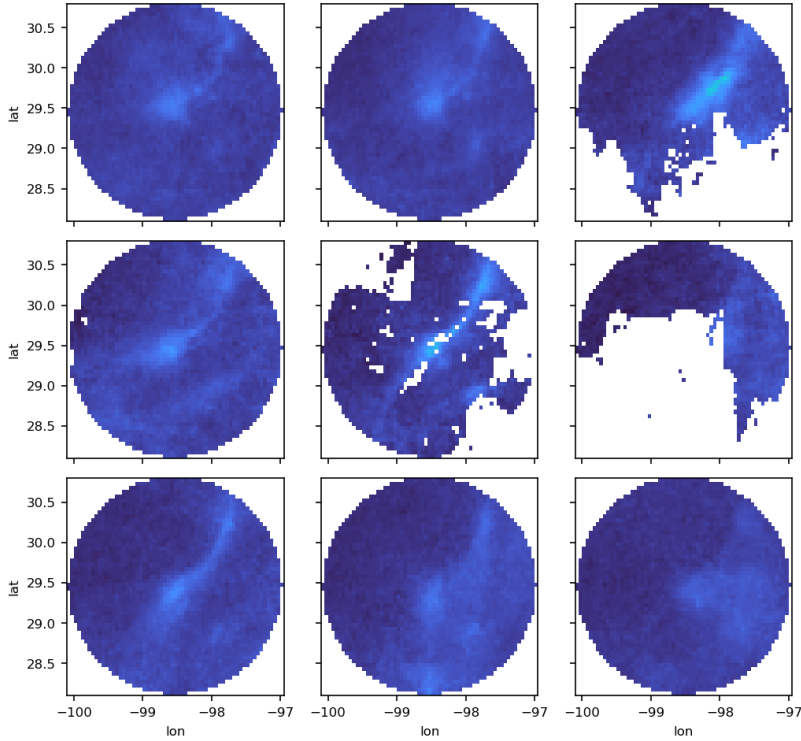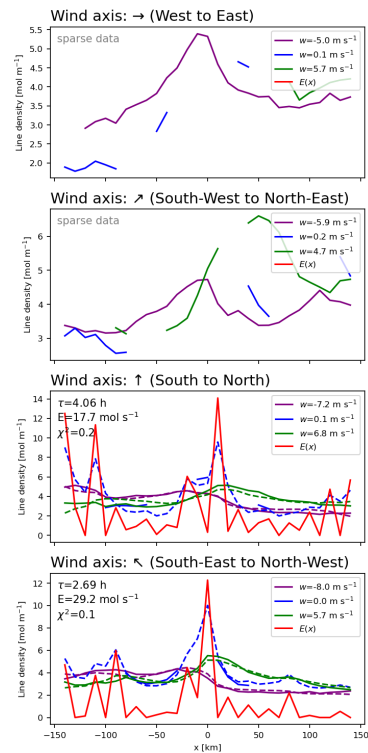

### 56.3 Summer

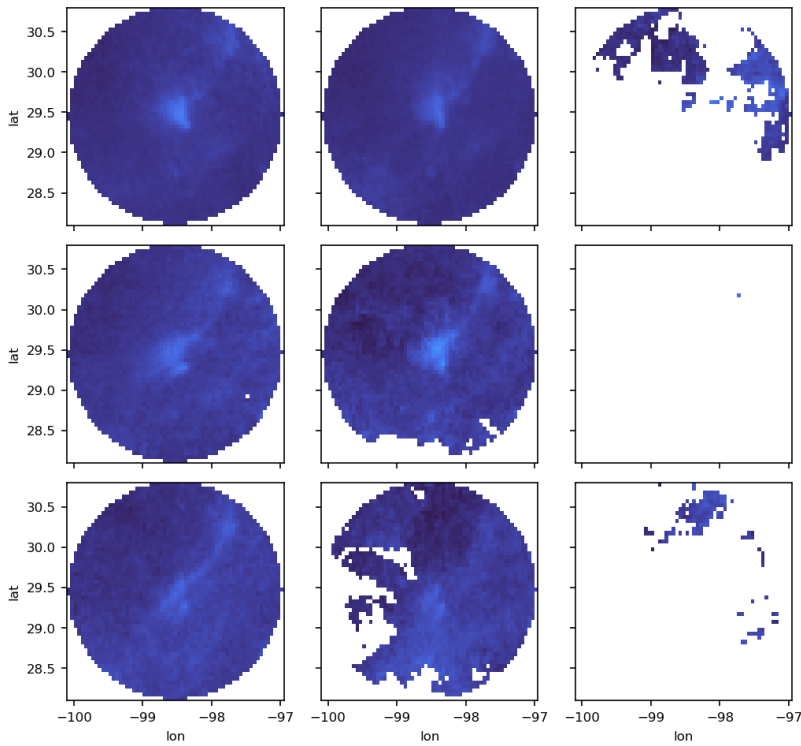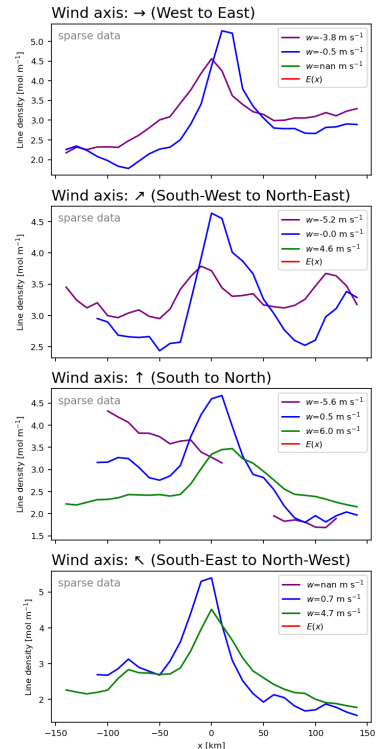

### 56.4 Autumn

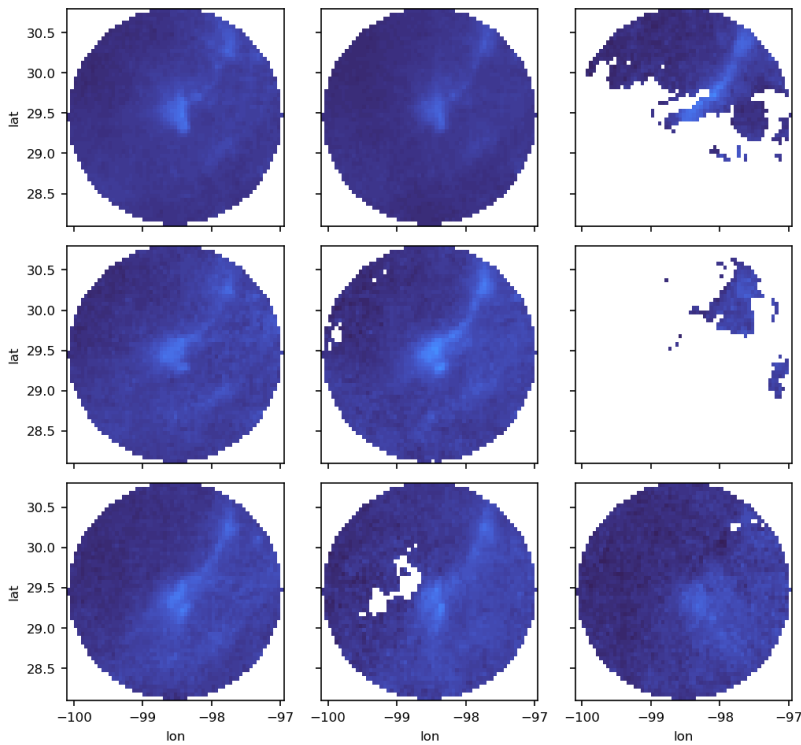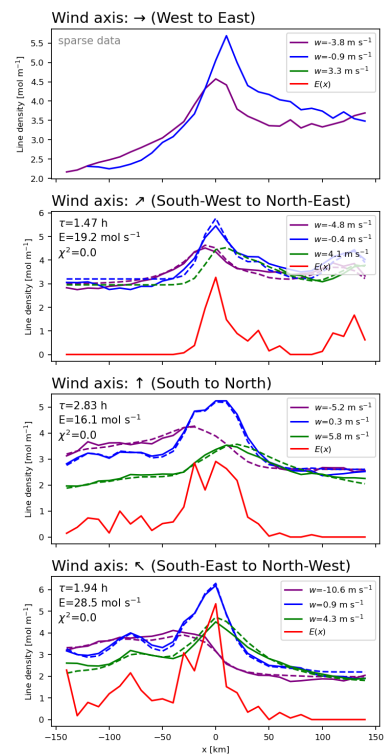

57.1 Winter

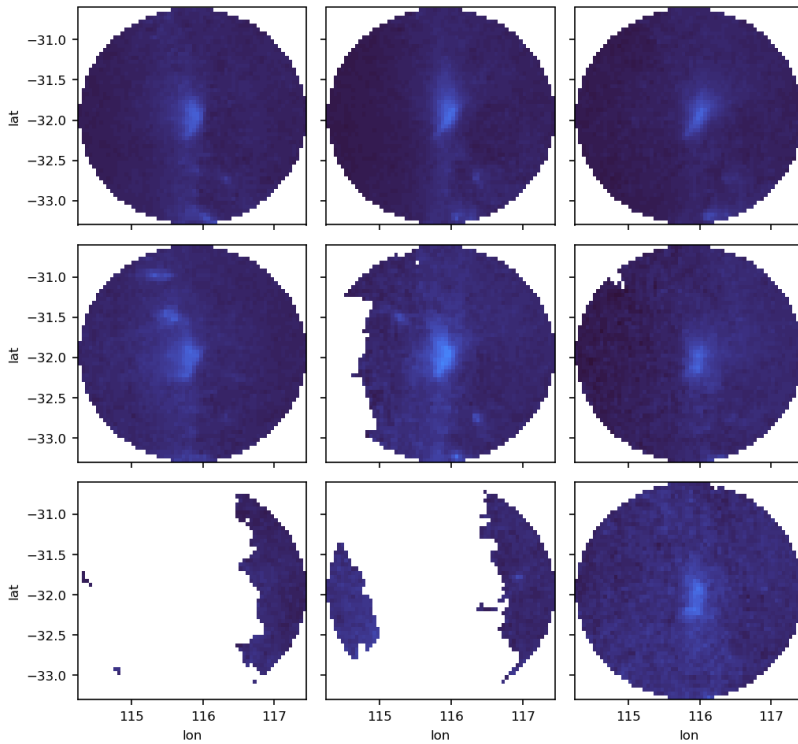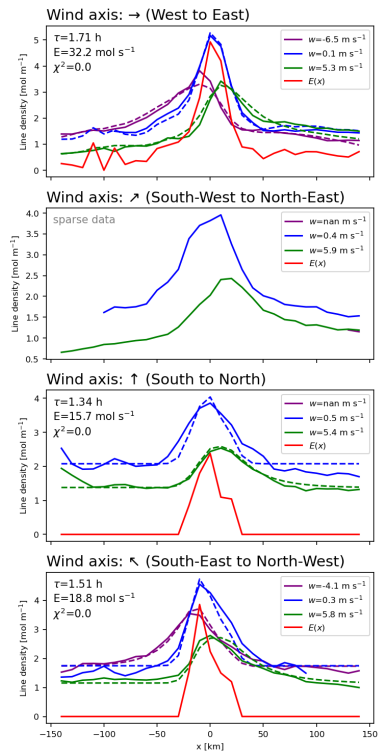

57.2 Spring

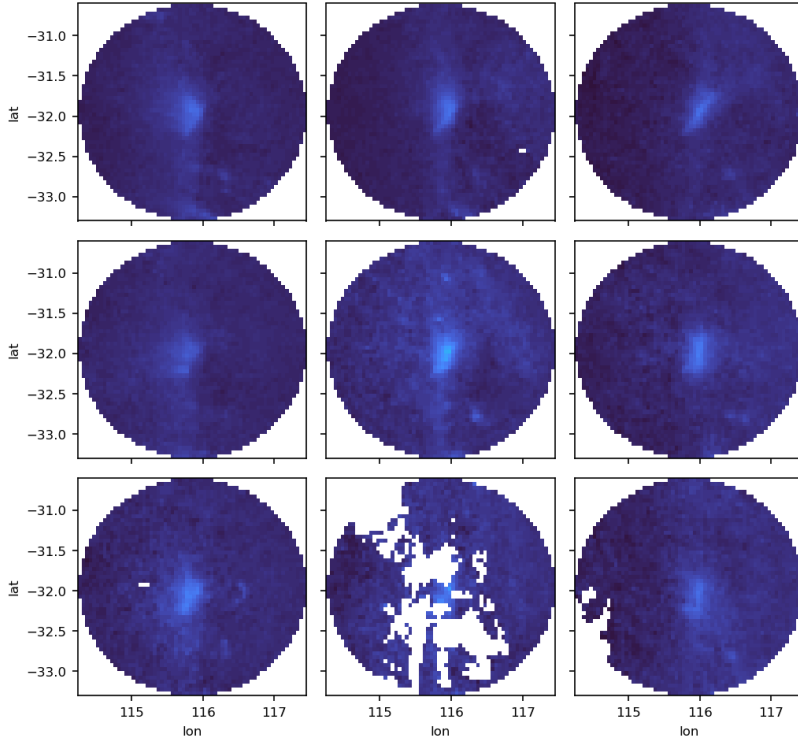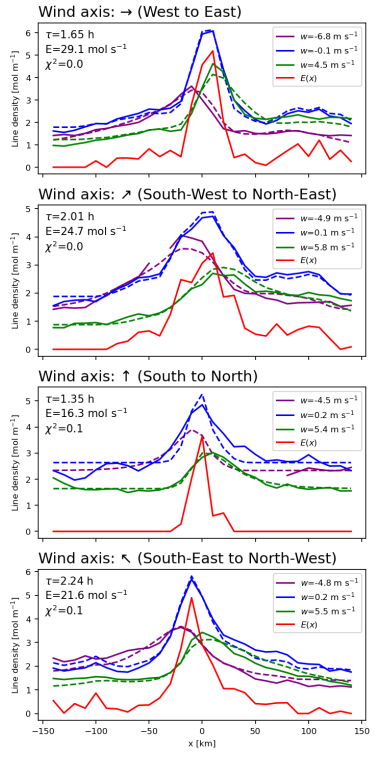

### 57.3 Summer

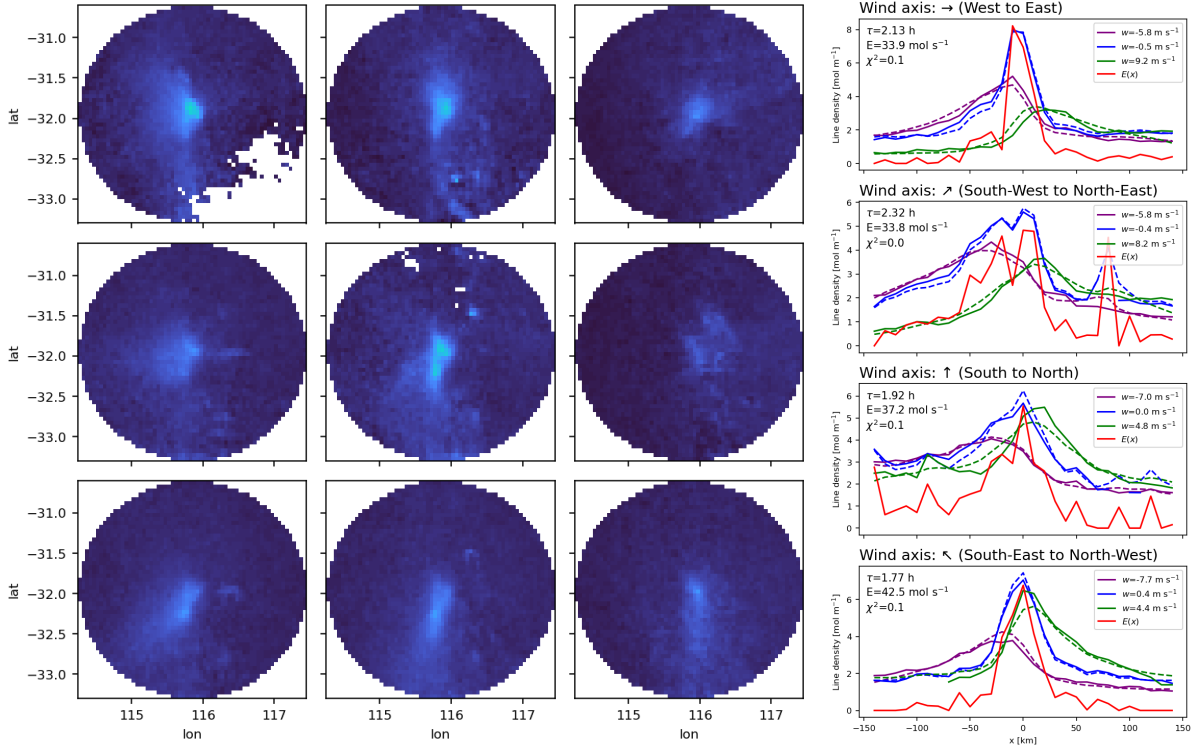

### 57.4 Autumn

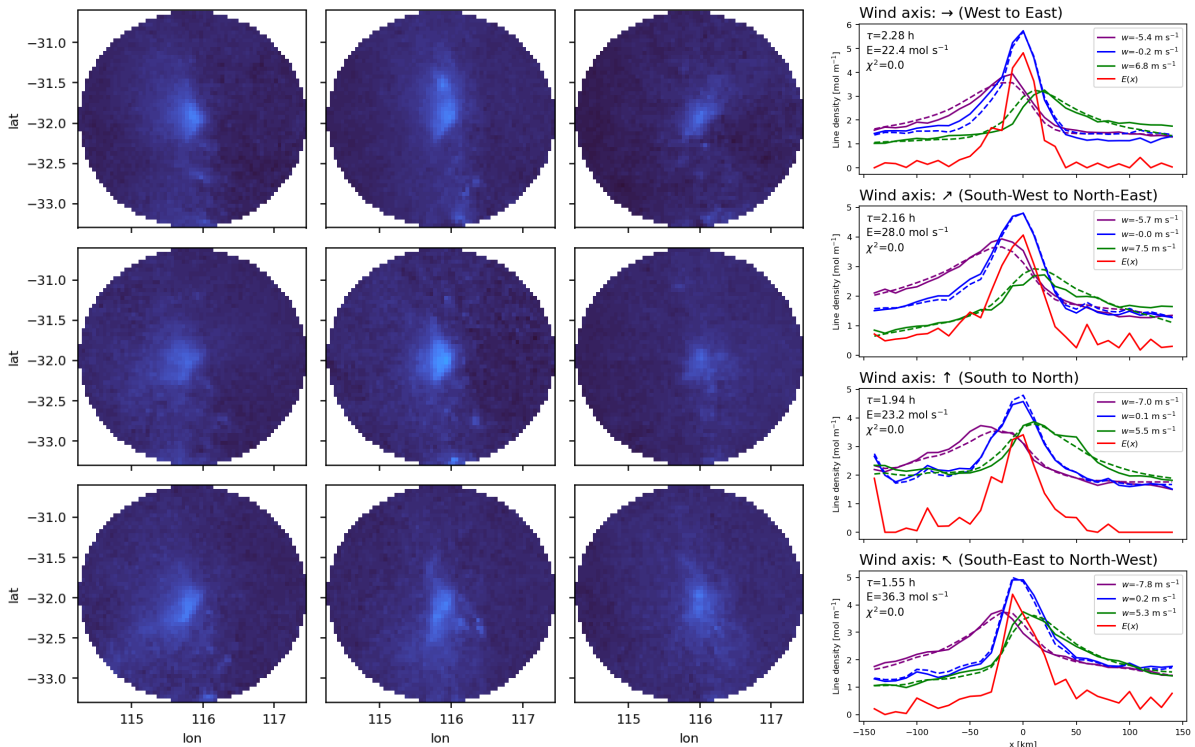

58.1 Winter

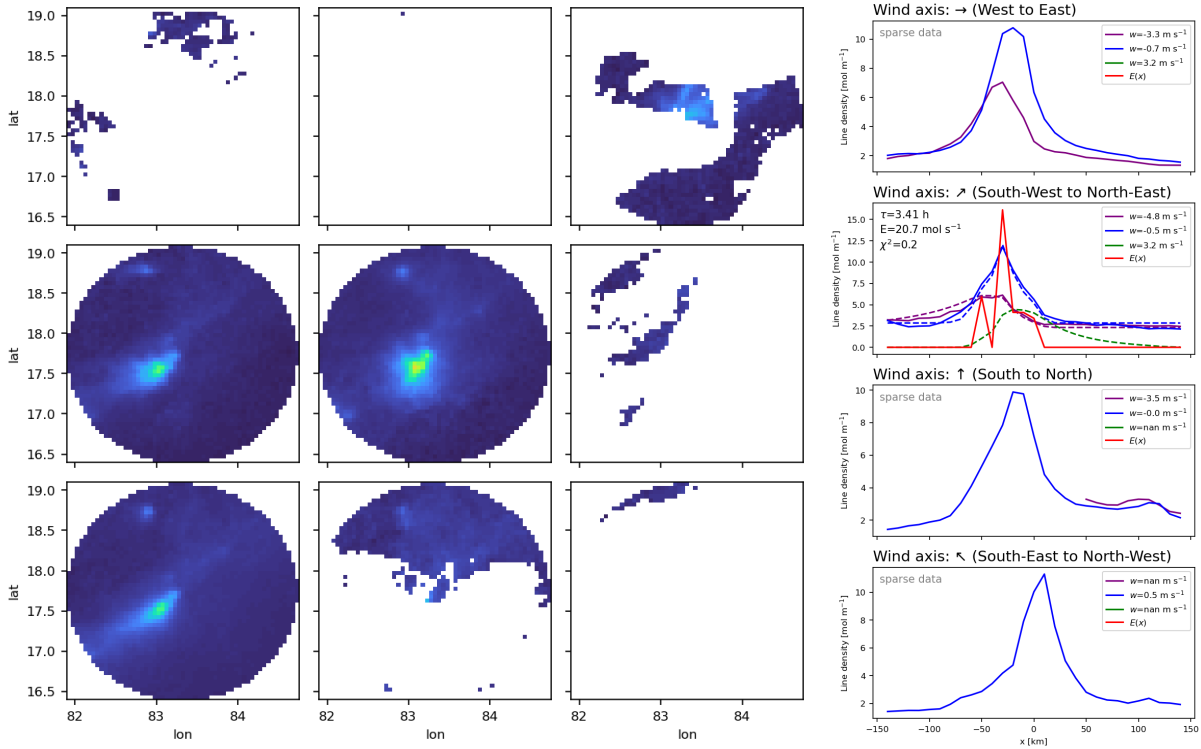

58.2 Spring

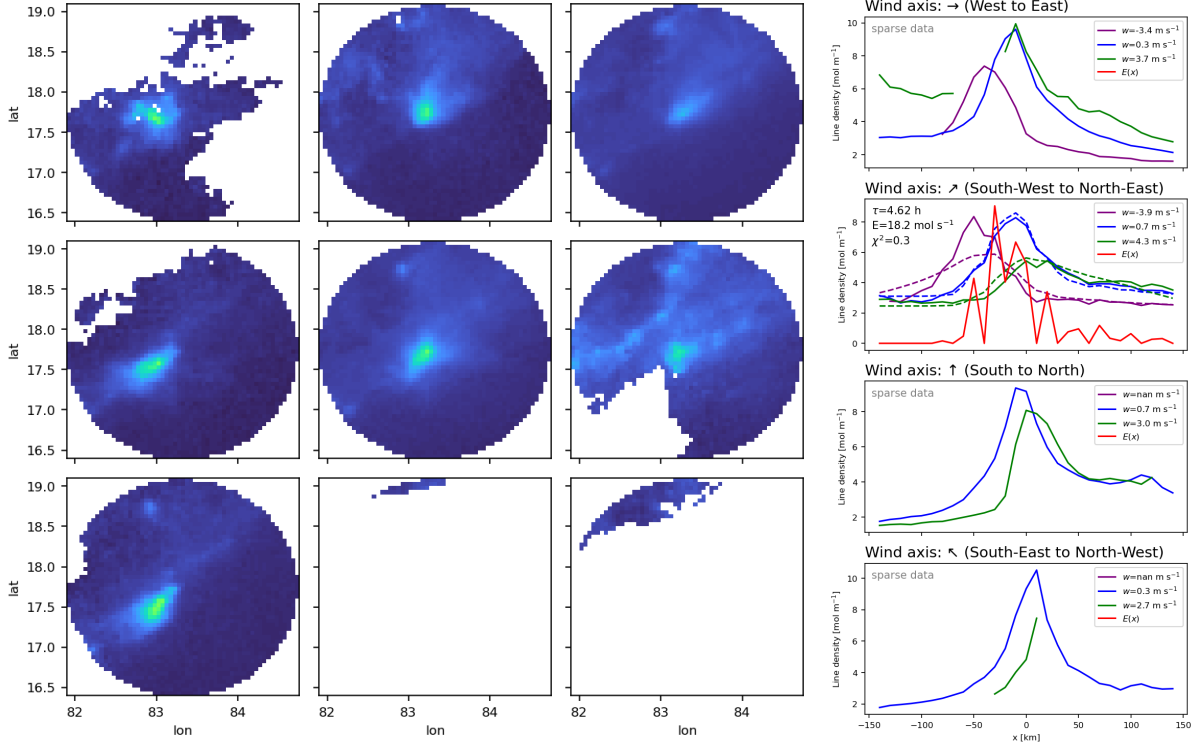

### 58.3 Summer

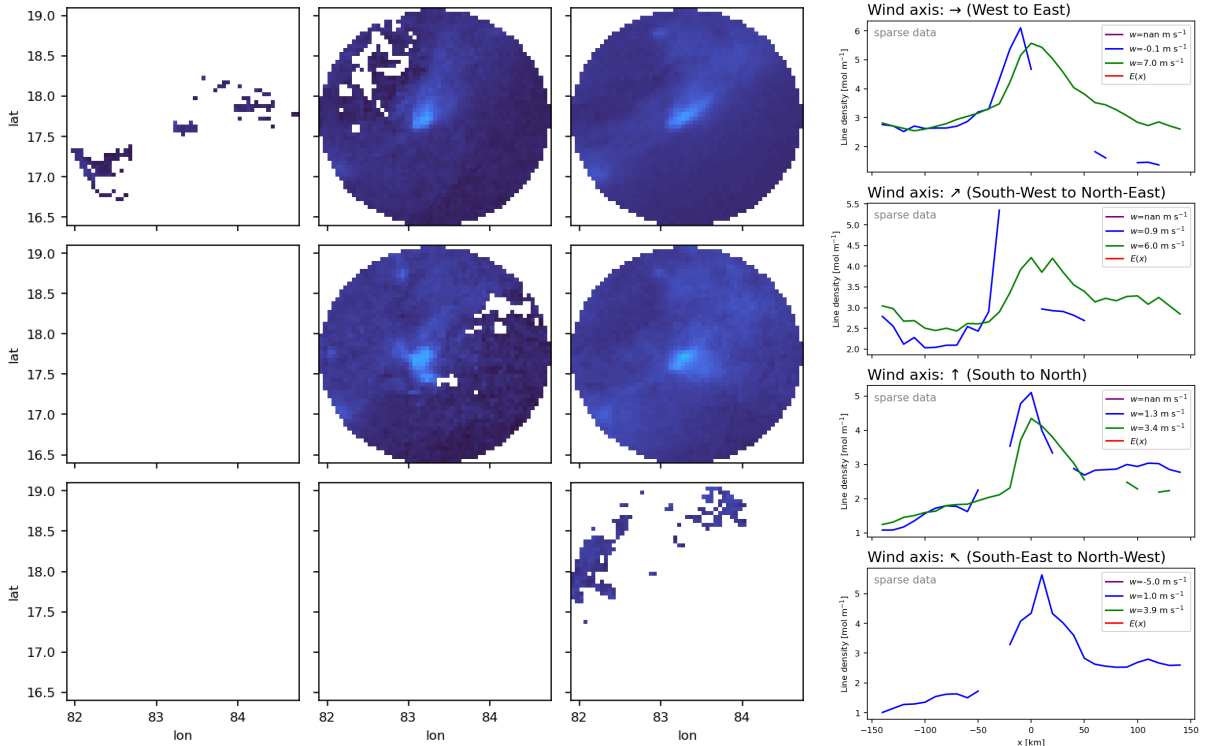

### 58.4 Autumn

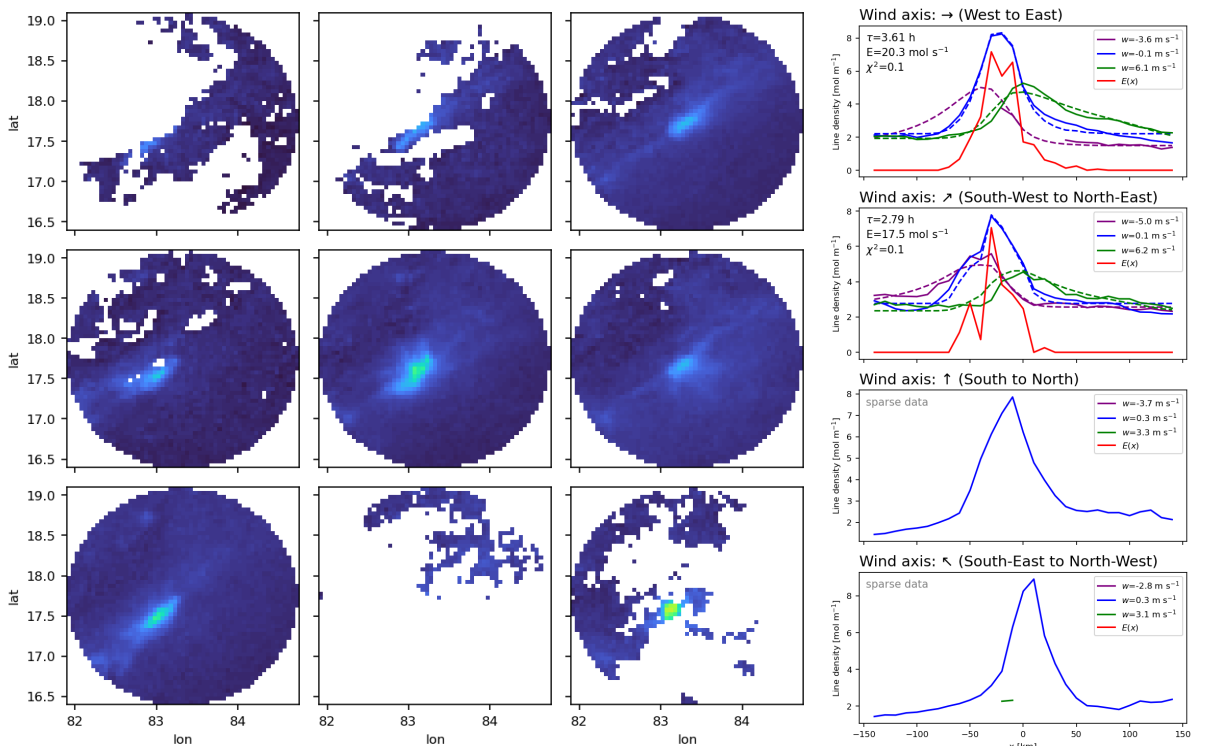

59.1 Winter

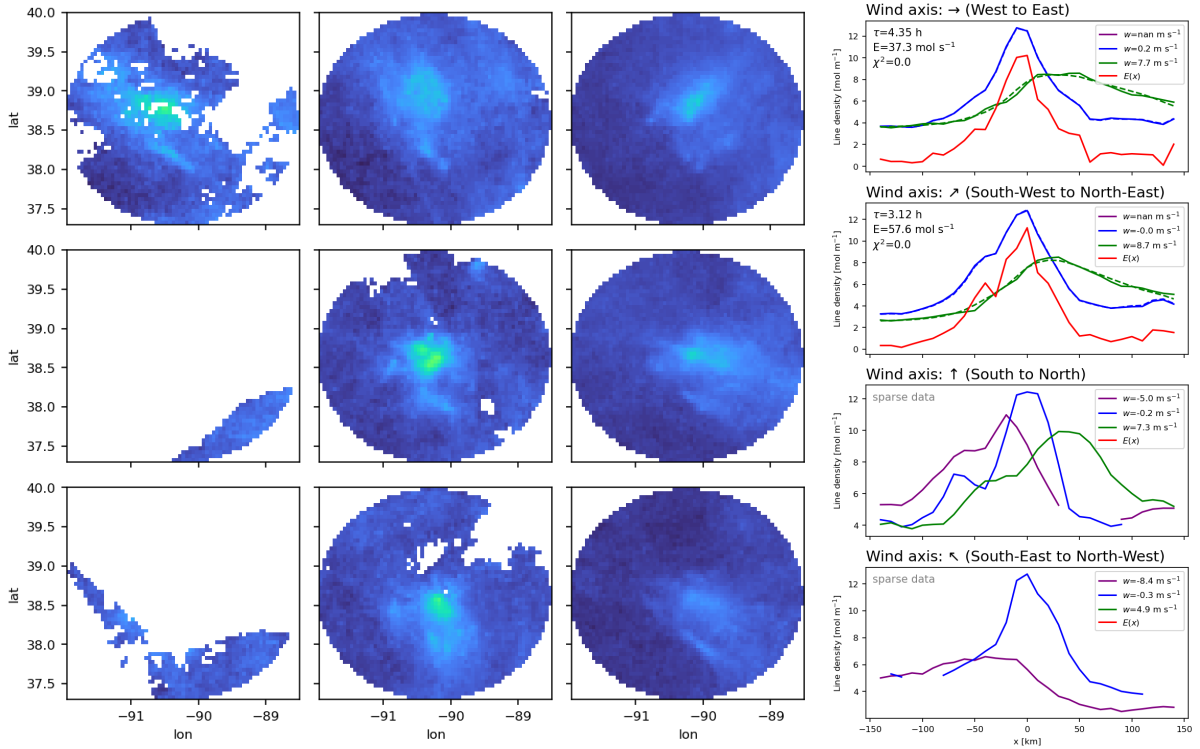

59.2 Spring

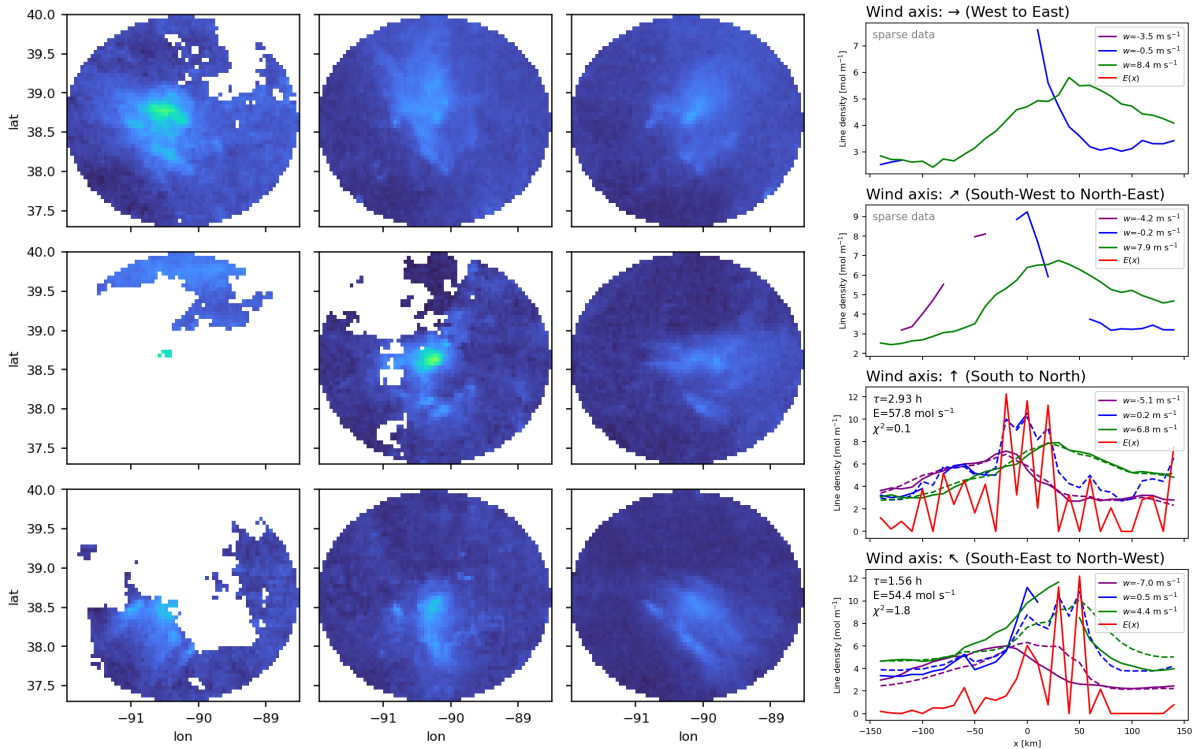

## 59.3 Summer

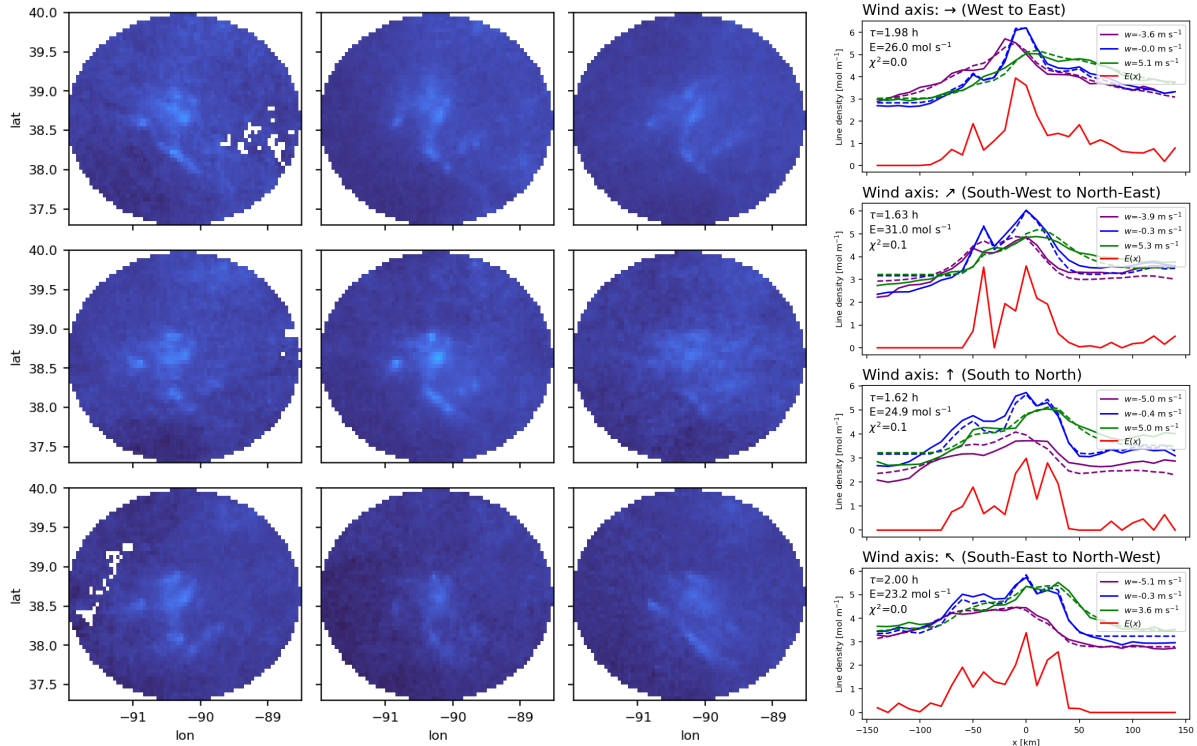

## 59.4 Autumn

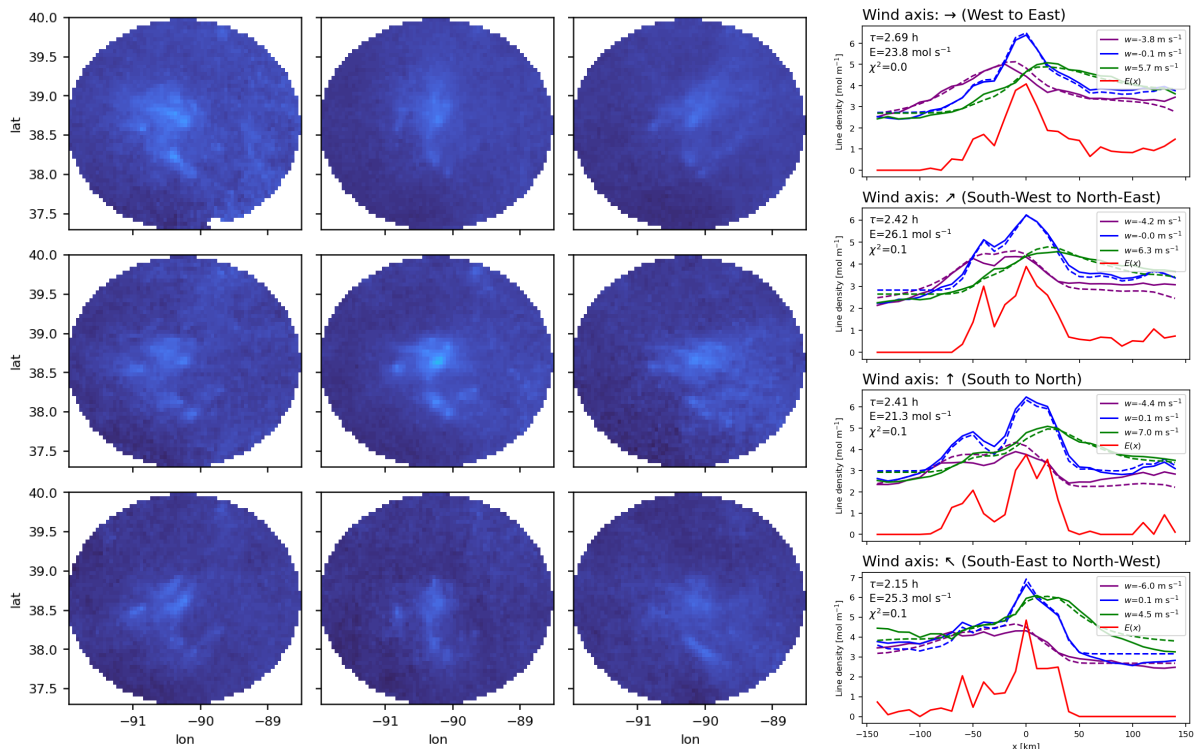



## 60 Minsk

### 60.1 Winter

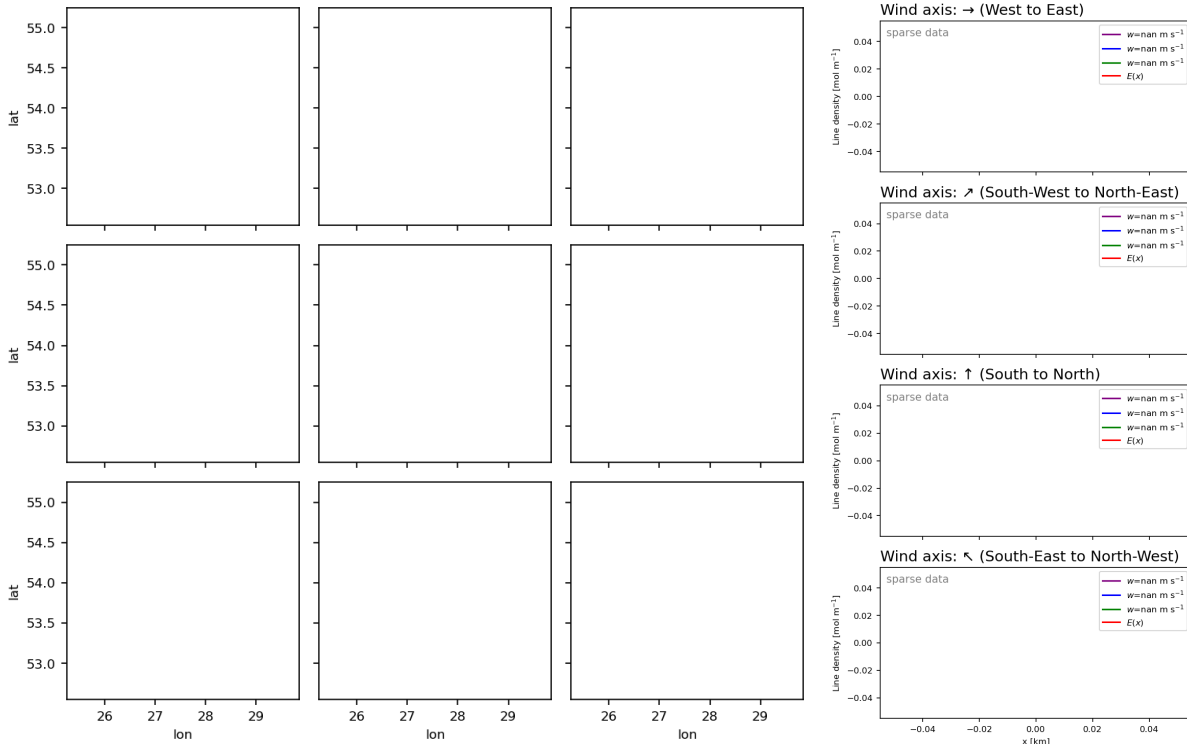

### 60.2 Spring

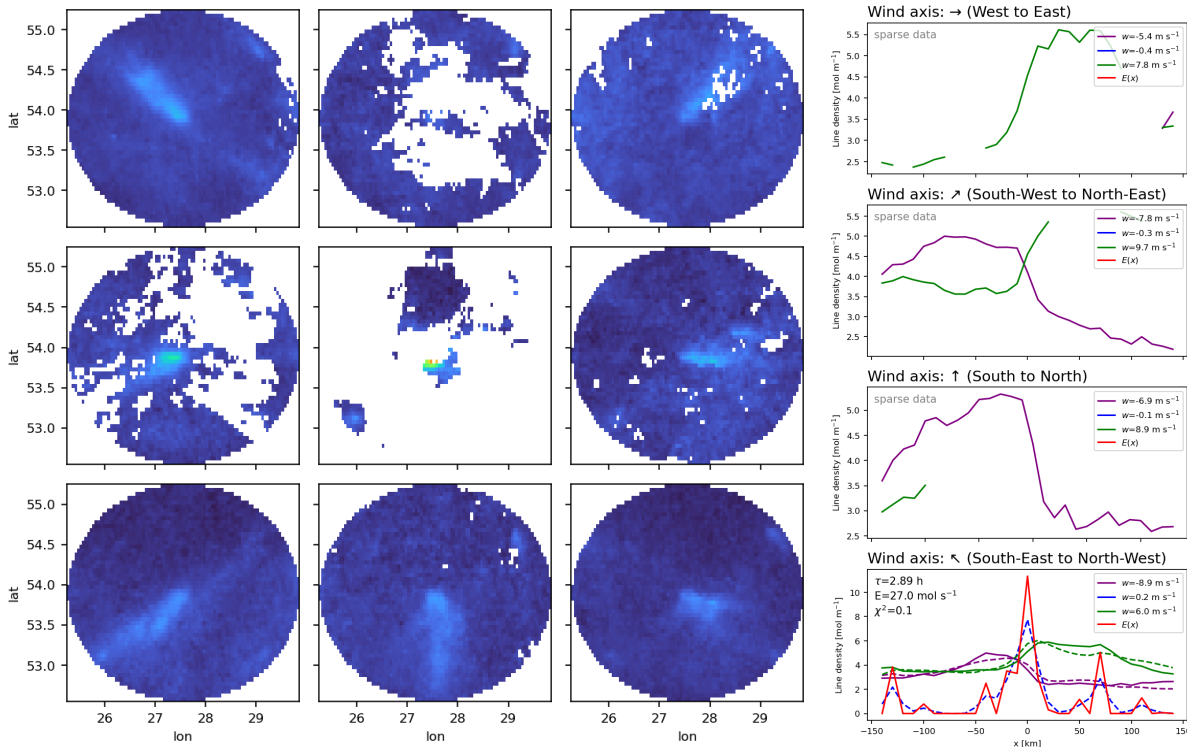

## 60.3 Summer

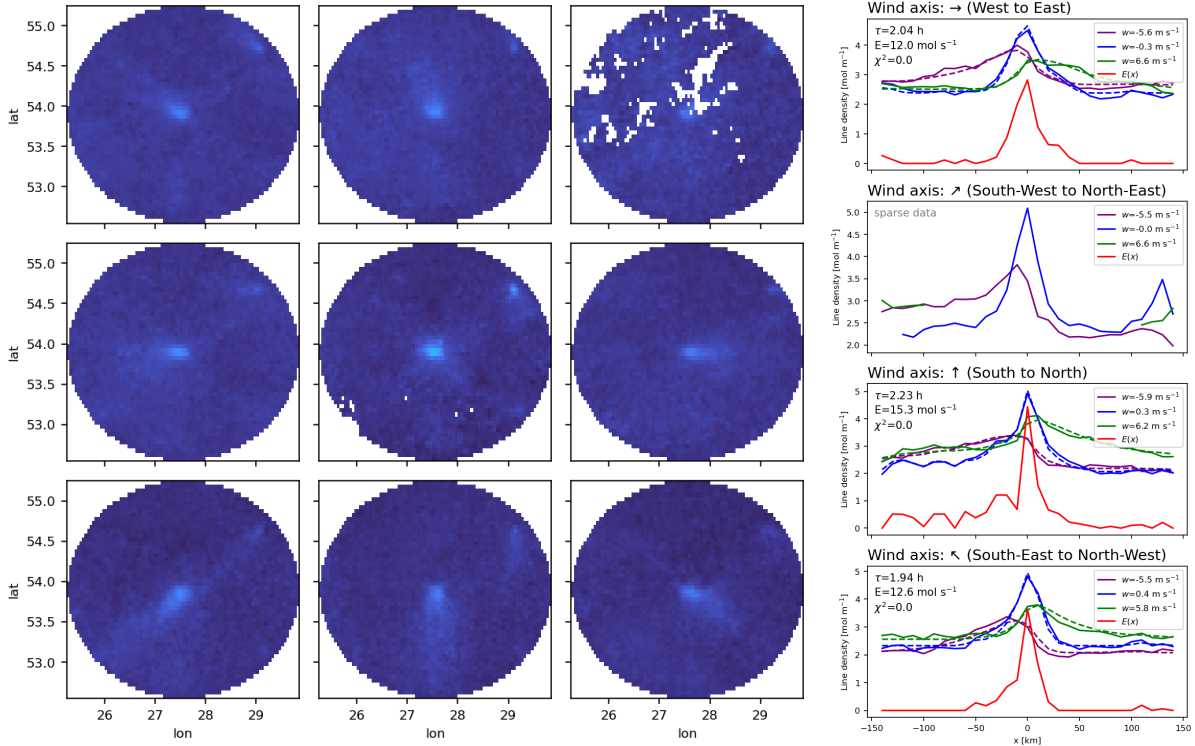

## 60.4 Autumn

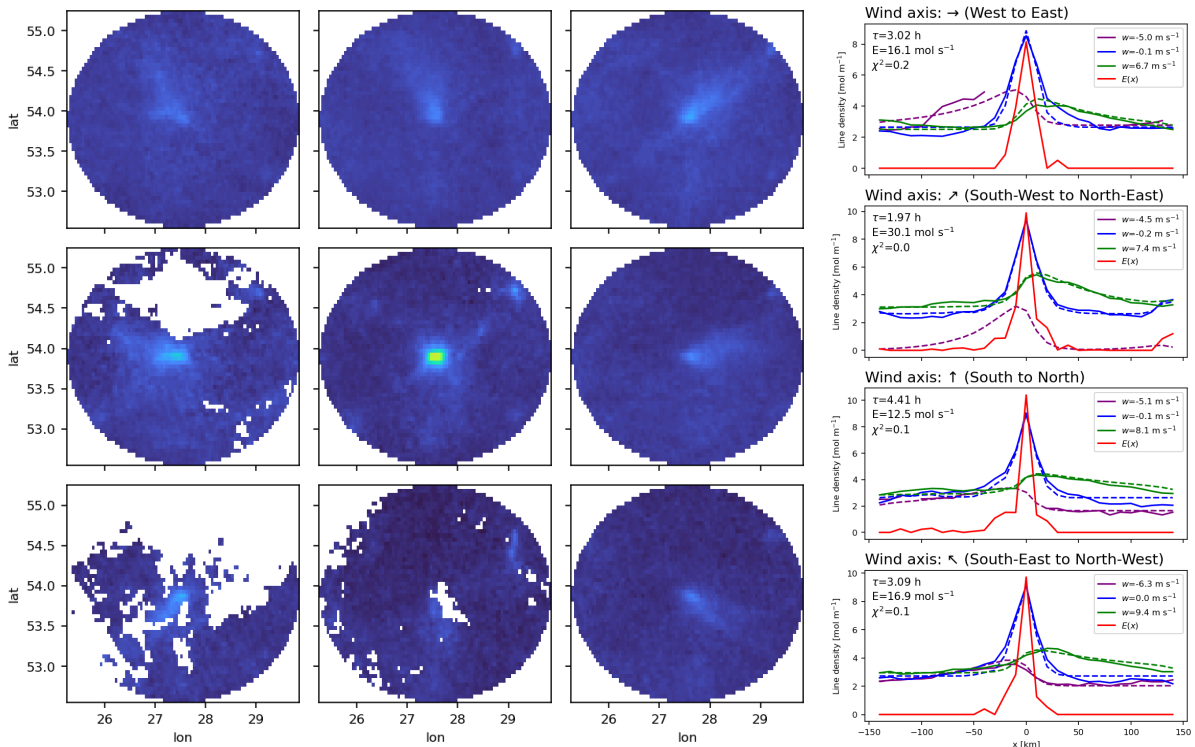

# 61 Vienna

## 61.1 Winter

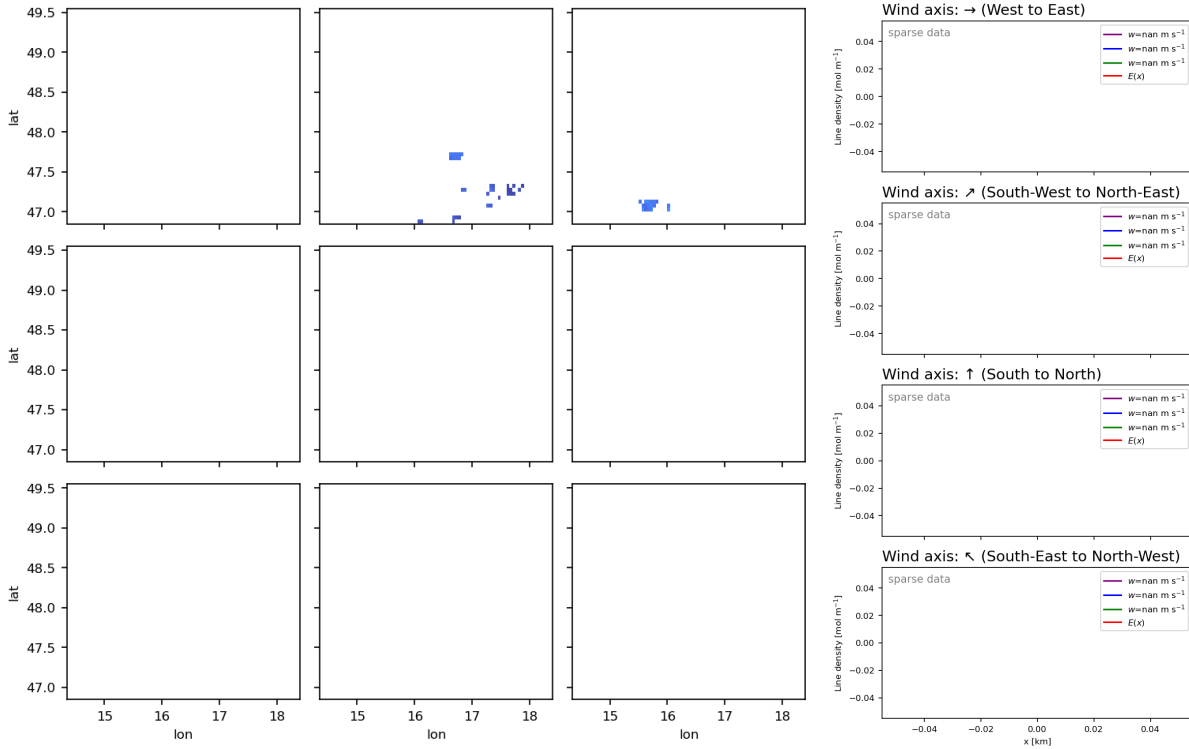

## 61.2 Spring

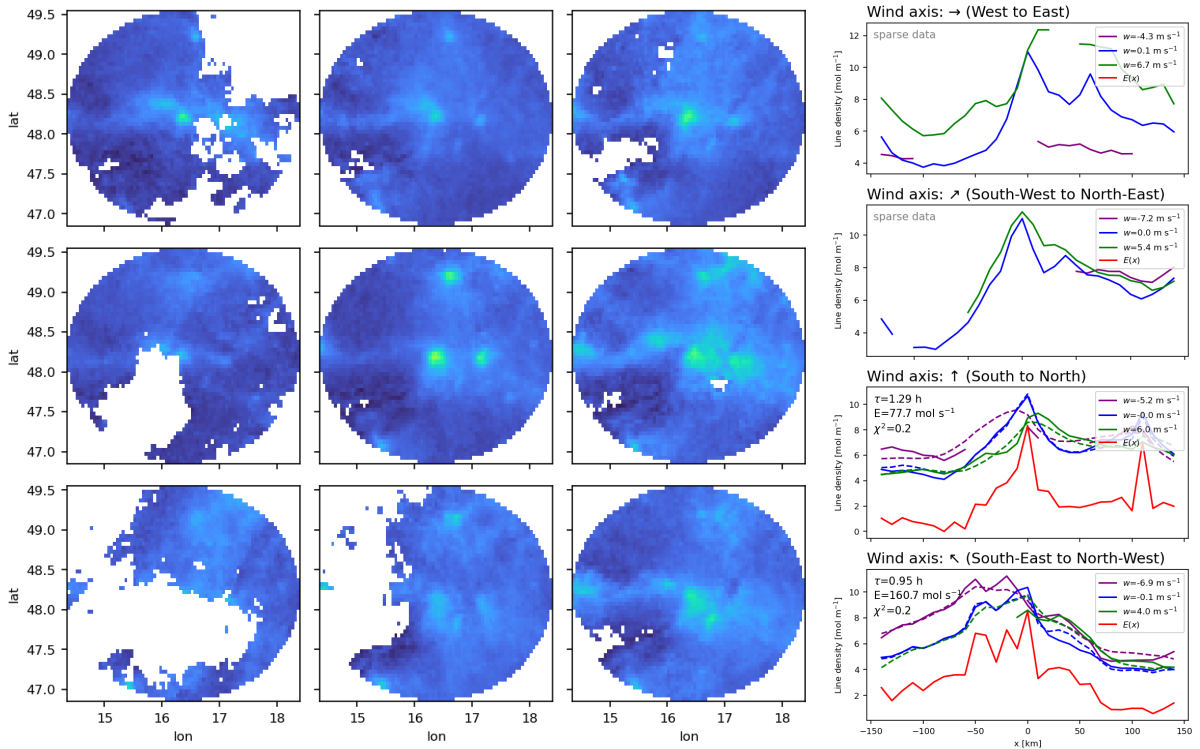

### 61.3 Summer

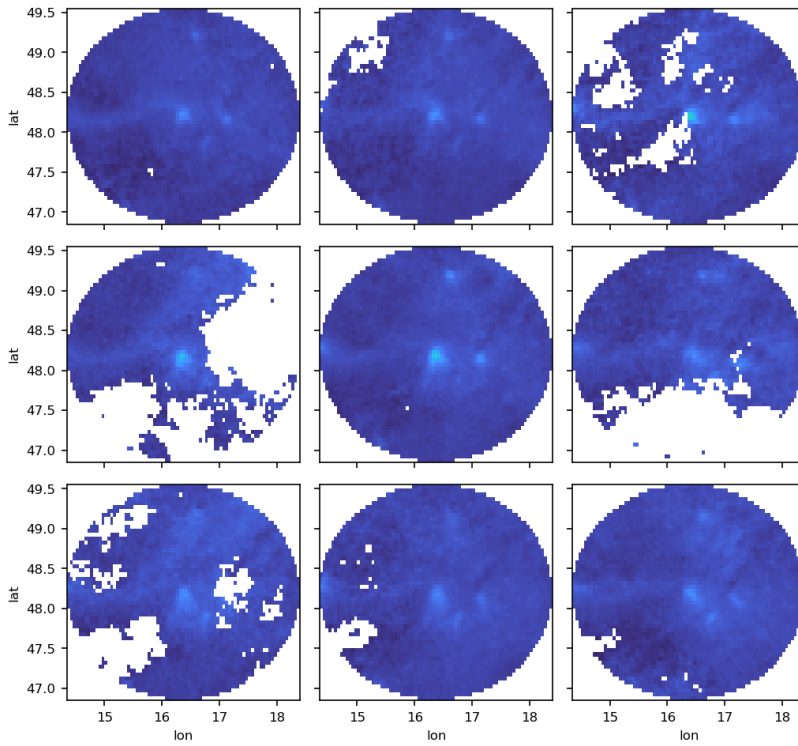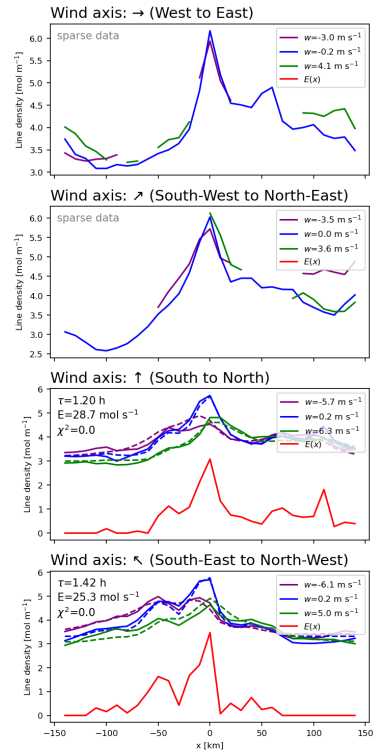

### 61.4 Autumn

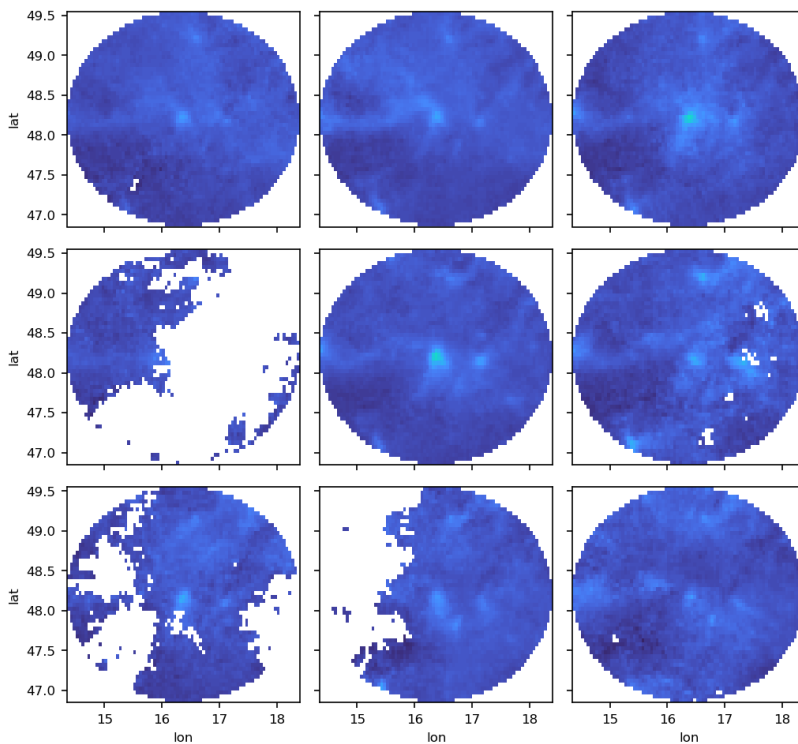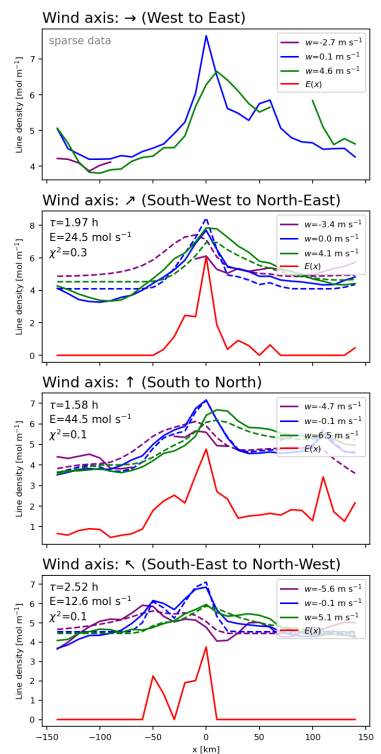

62.1 Winter

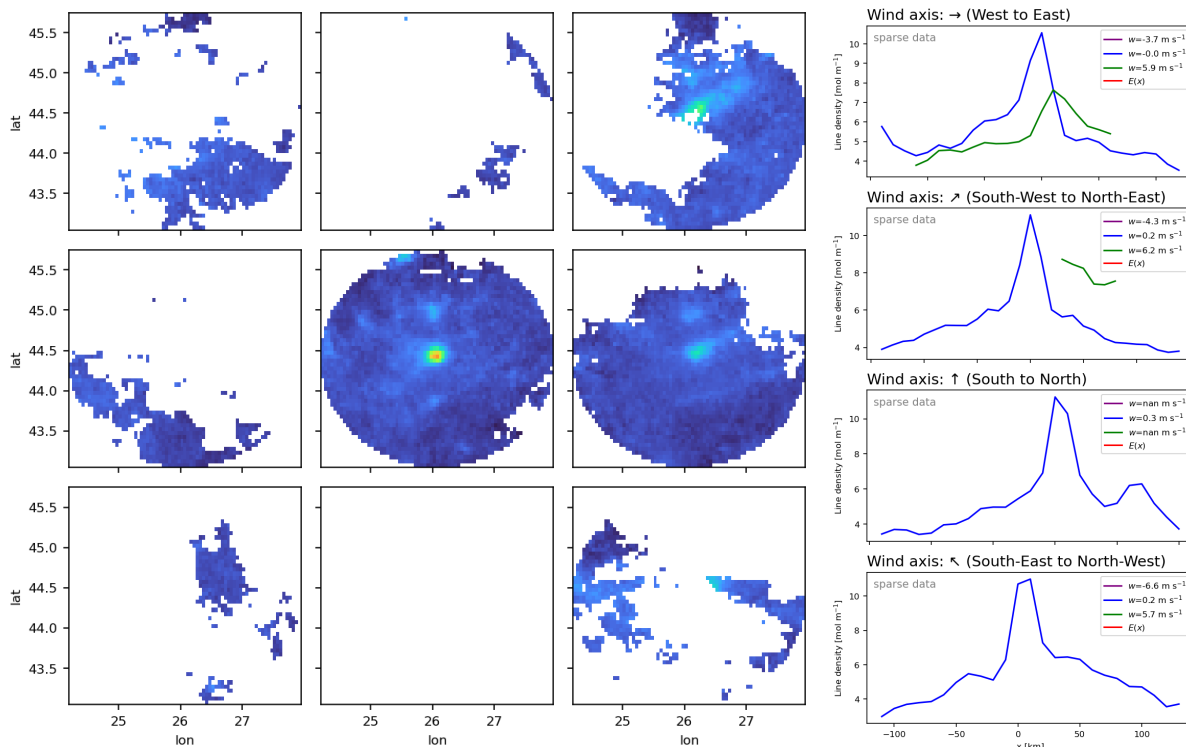

62.2 Spring

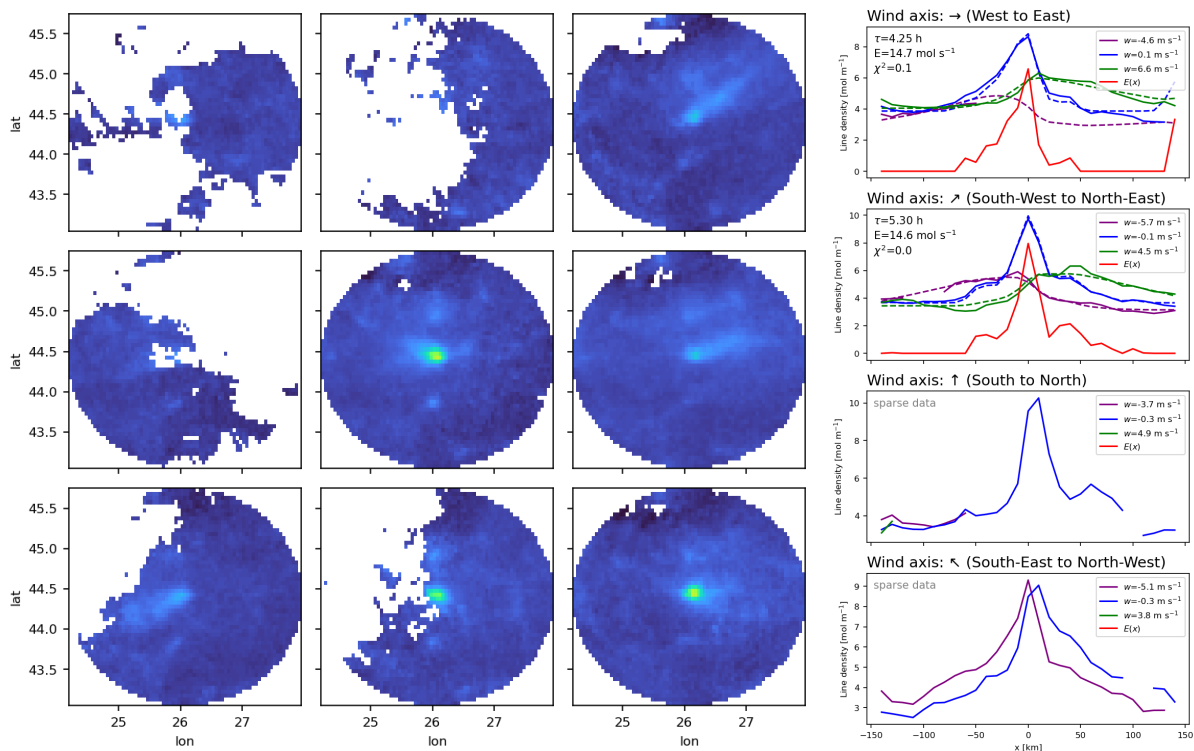

## 62.3 Summer

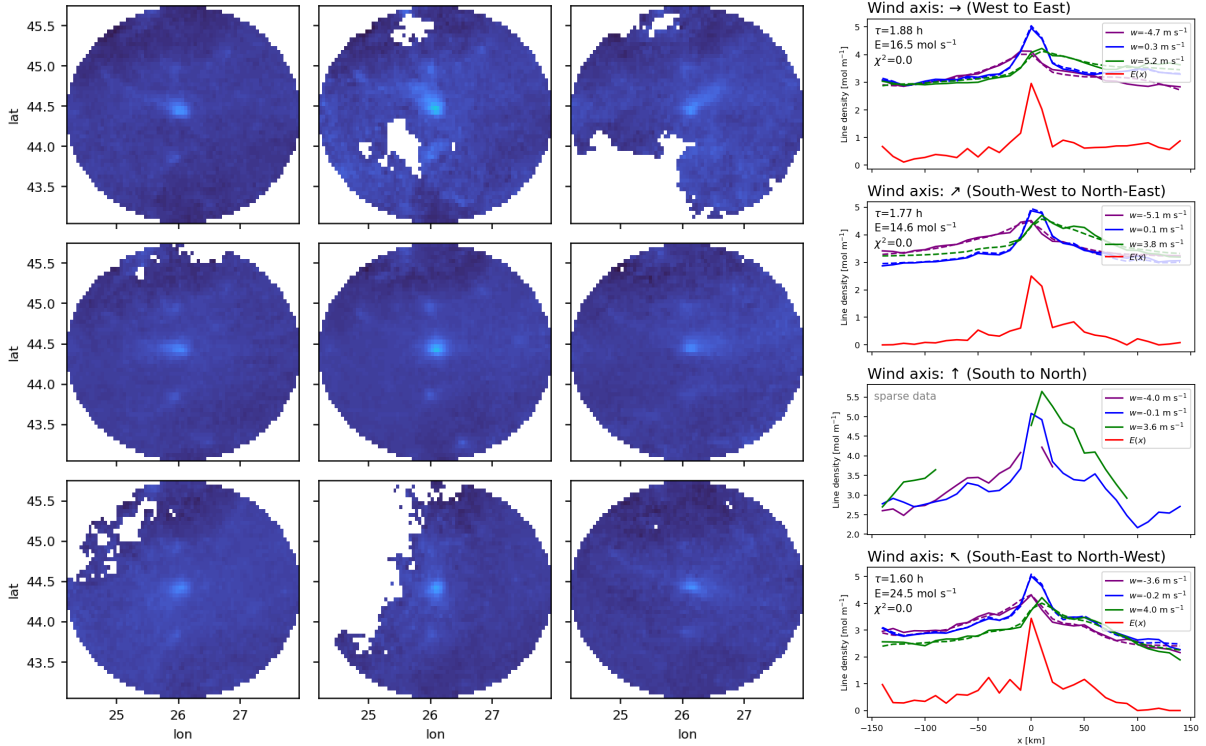

## 62.4 Autumn

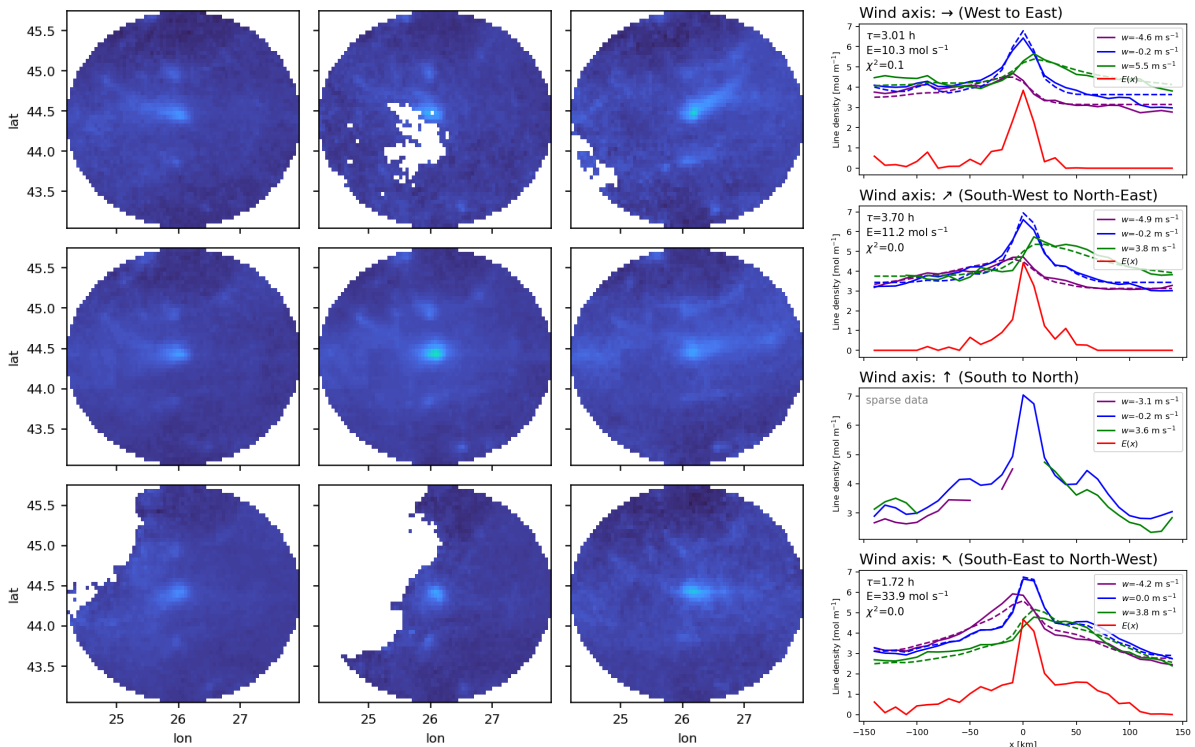

63.1 Winter

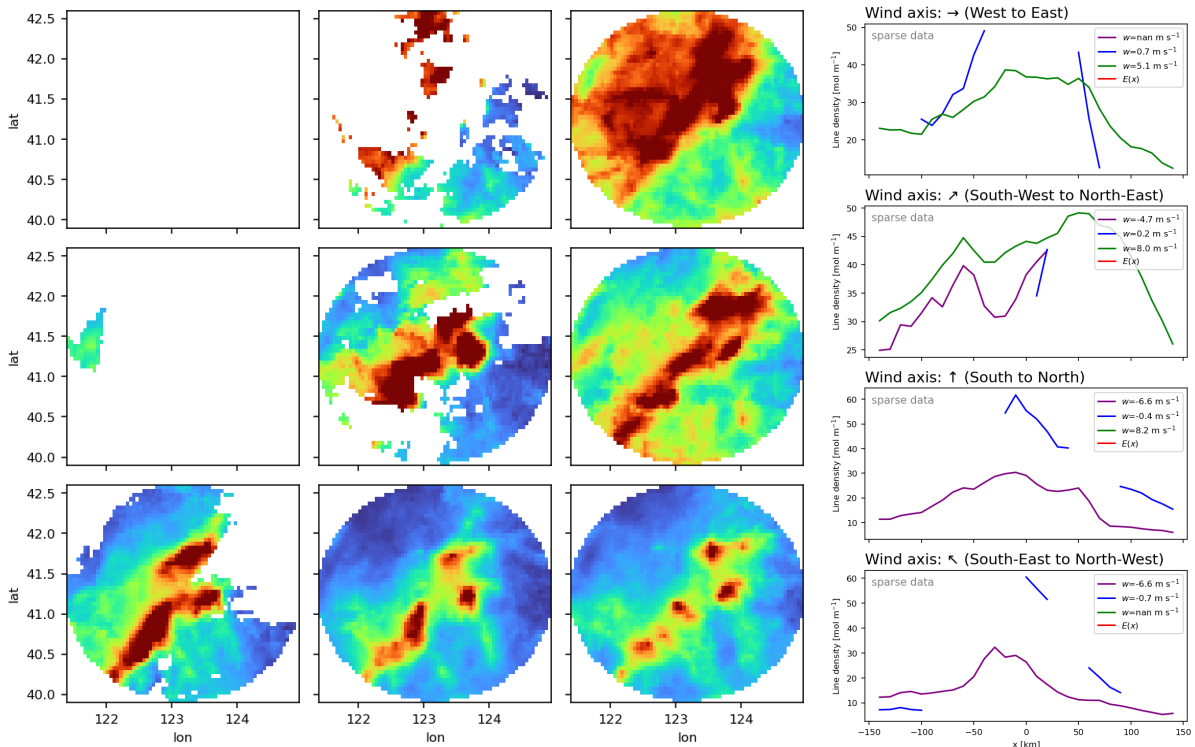

63.2 Spring

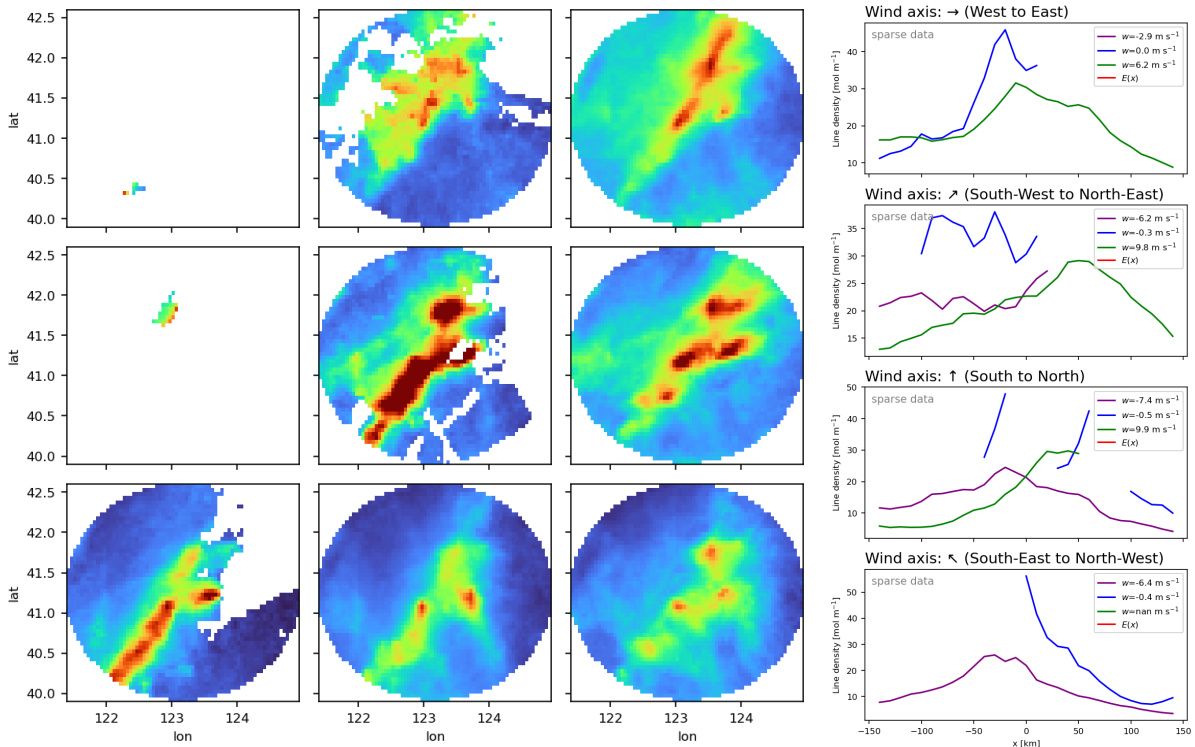

### 63.3 Summer

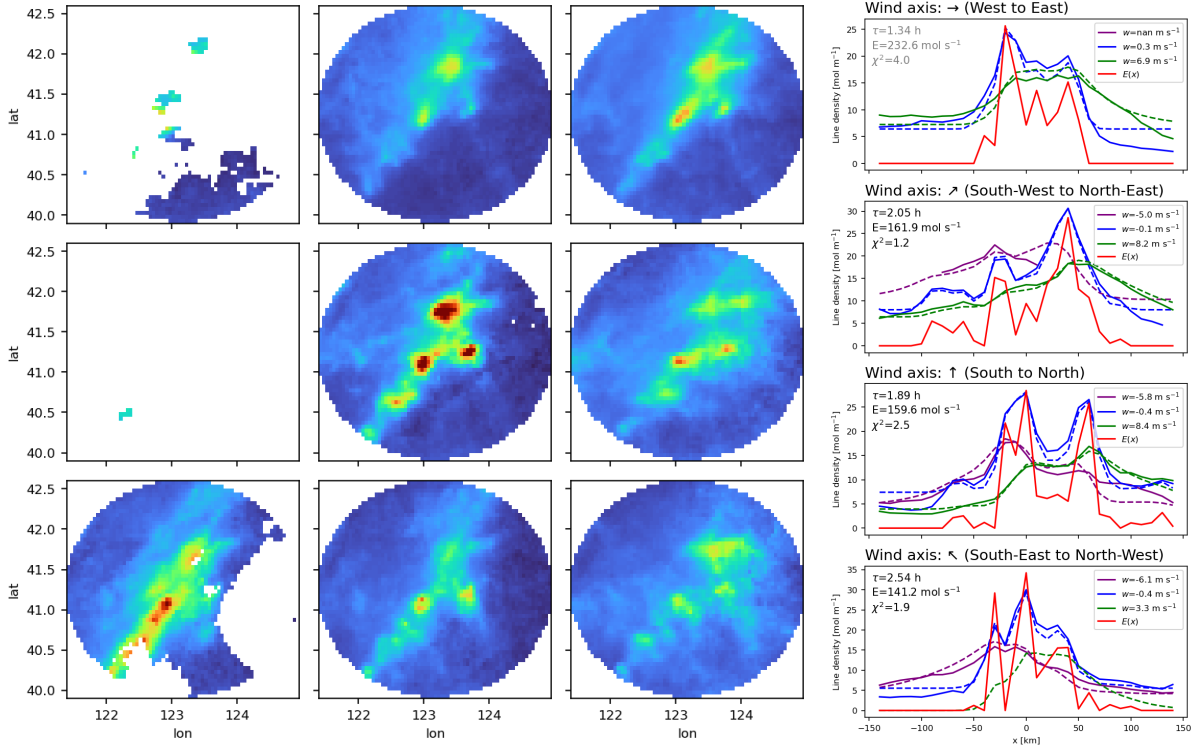

### 63.4 Autumn

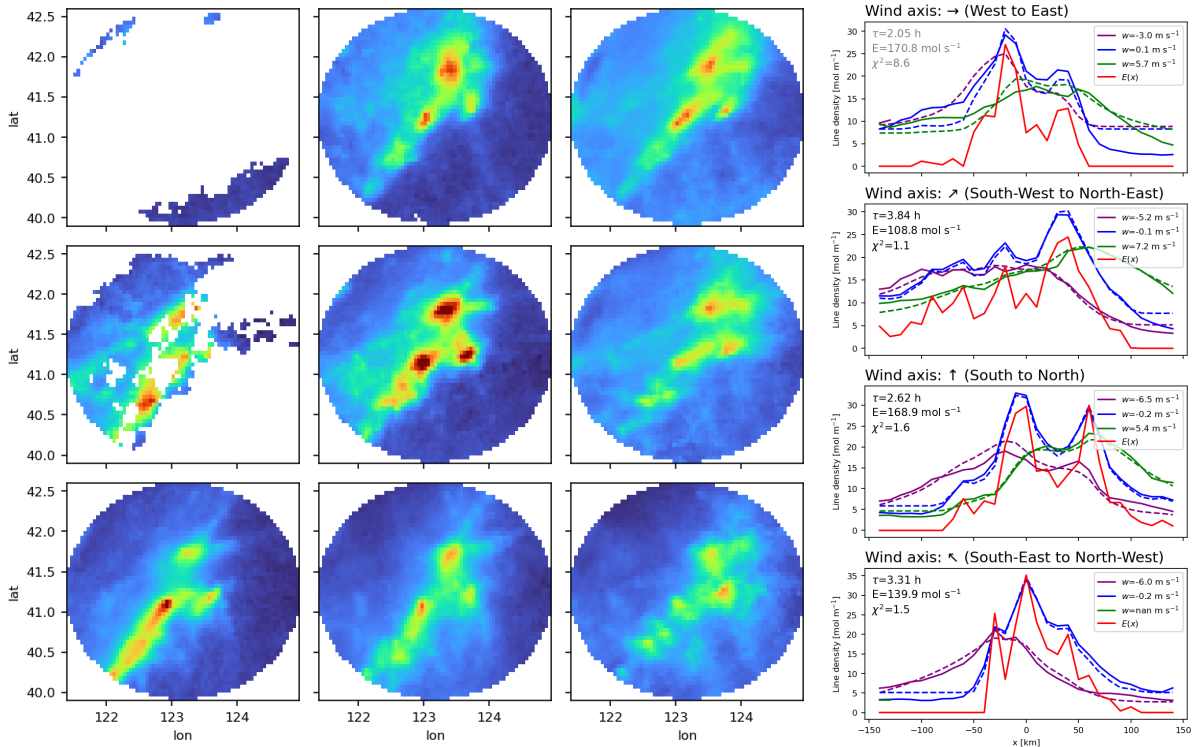



64.1 Winter

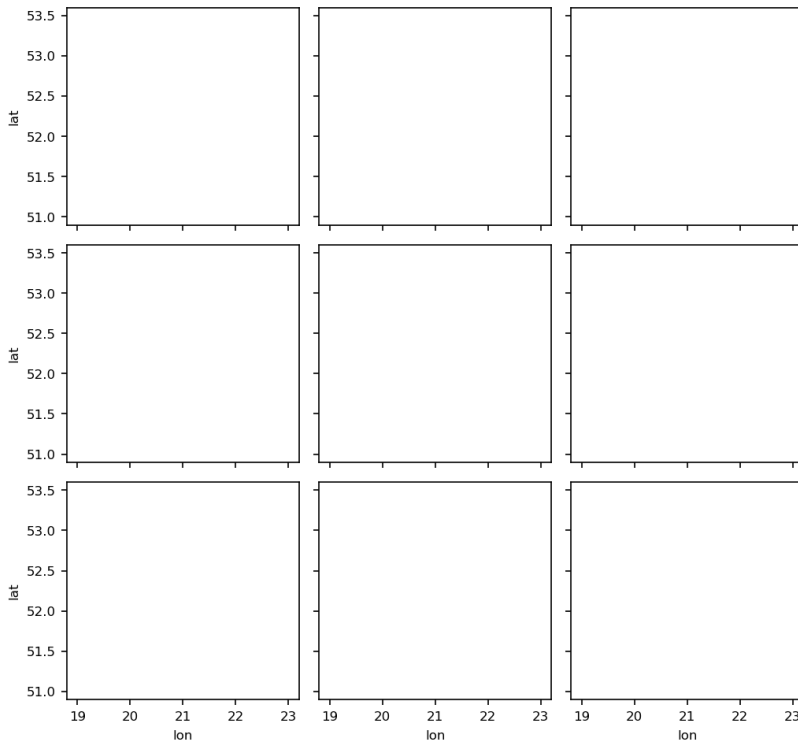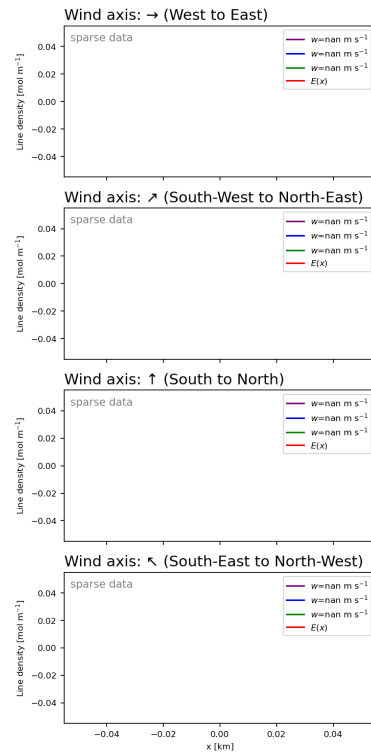

64.2 Spring

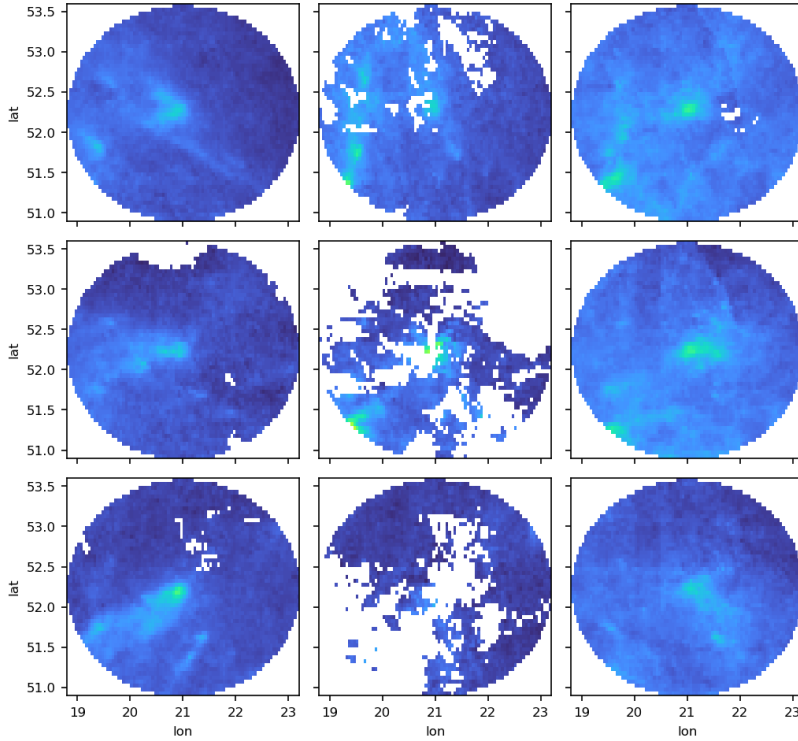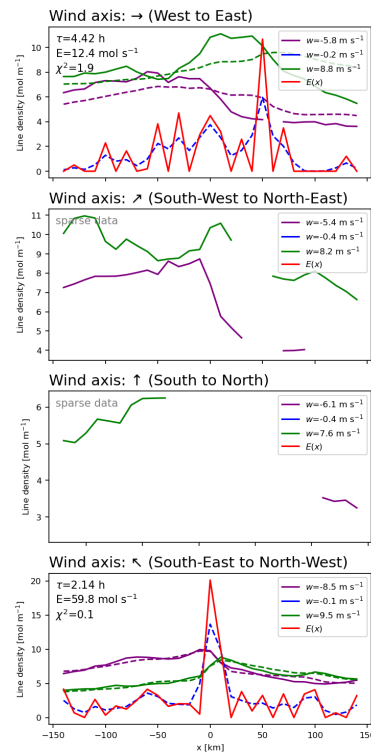

## 64.3 Summer

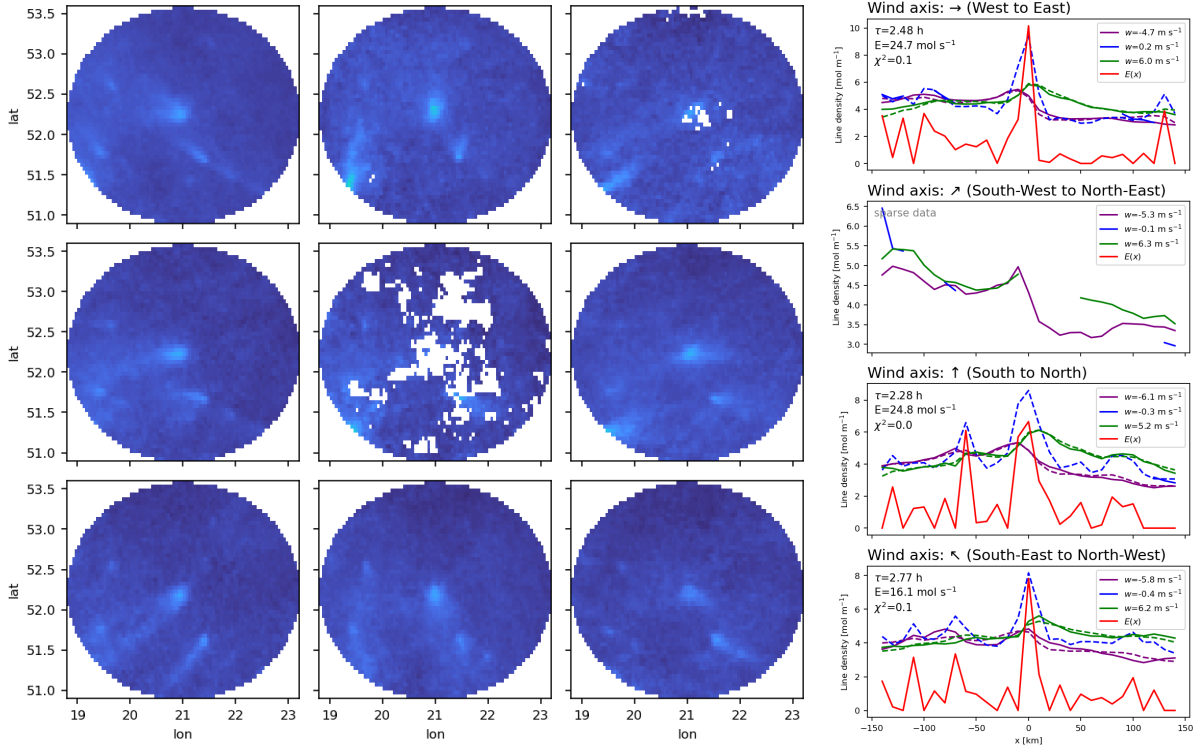

## 64.4 Autumn

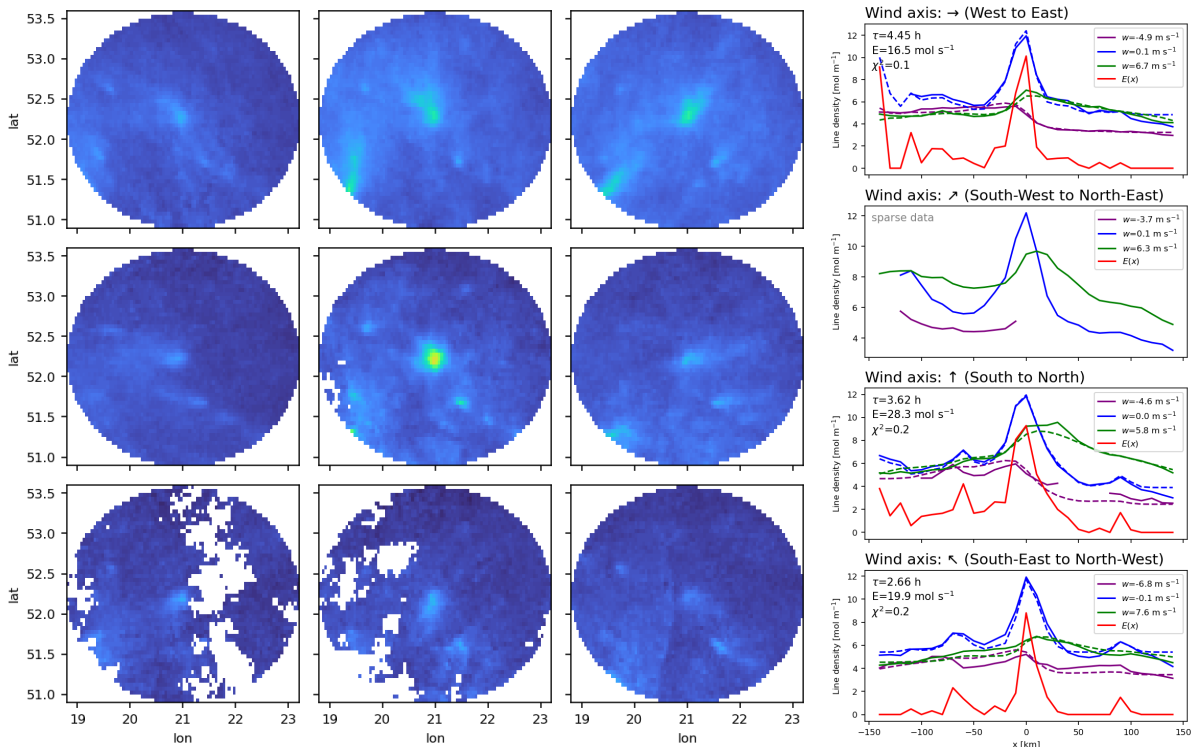

## 65 Budapest

### 65.1 Winter

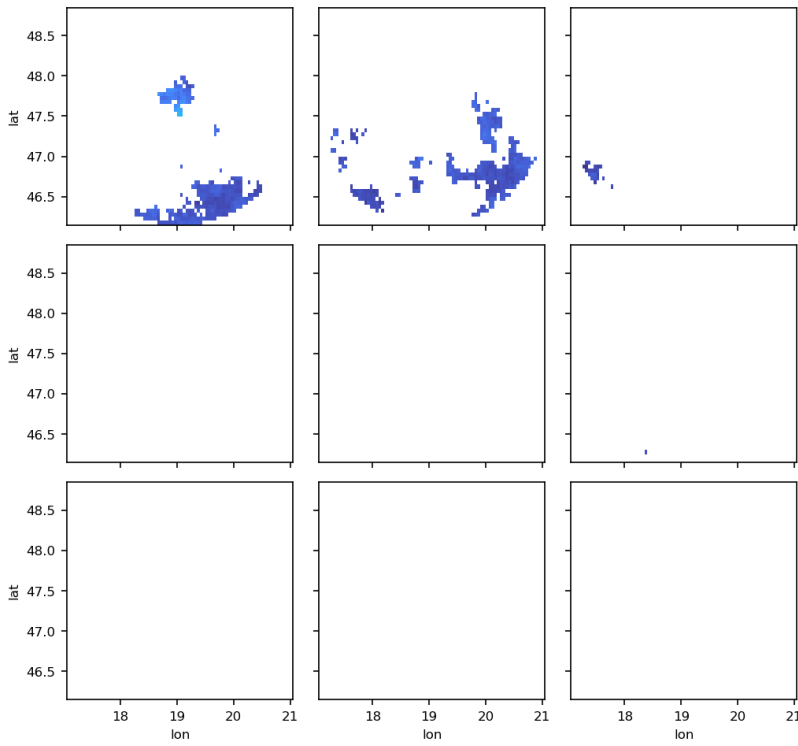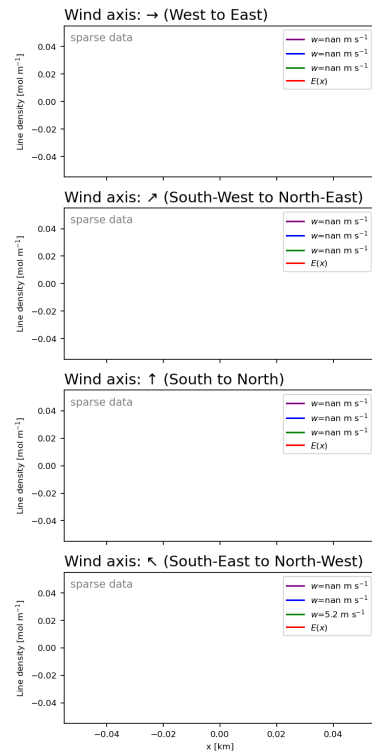

### 65.2 Spring

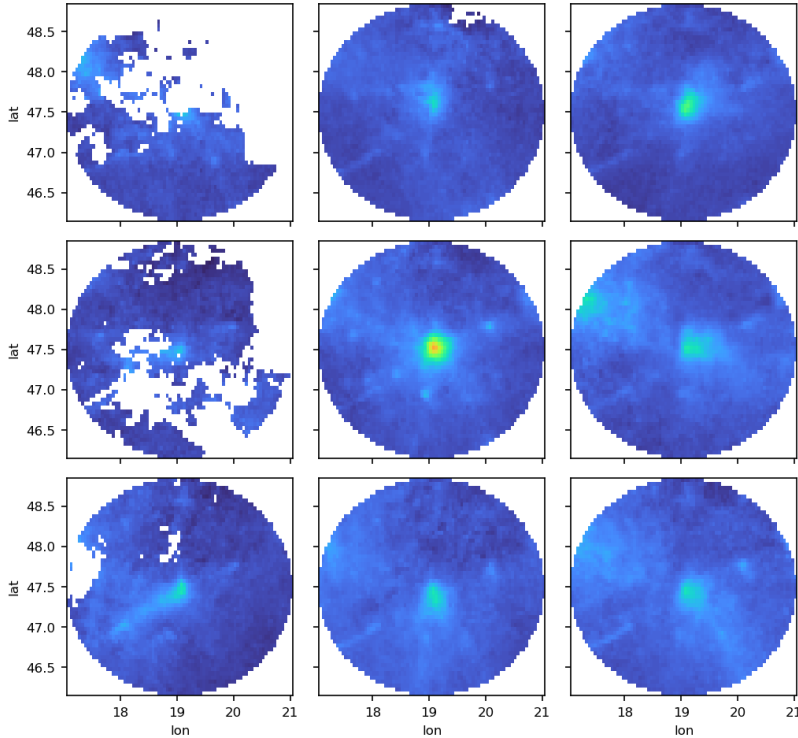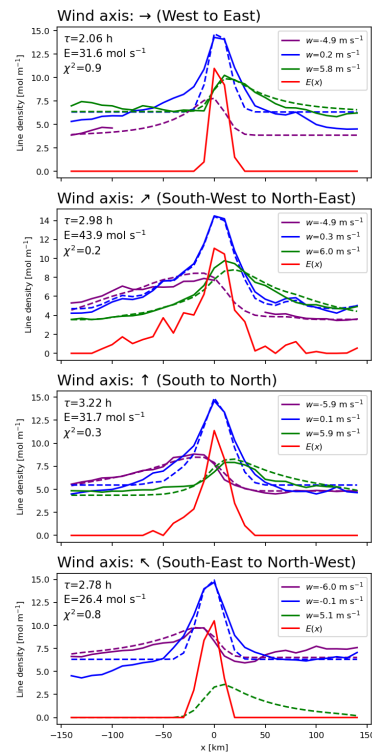

## 65.3 Summer

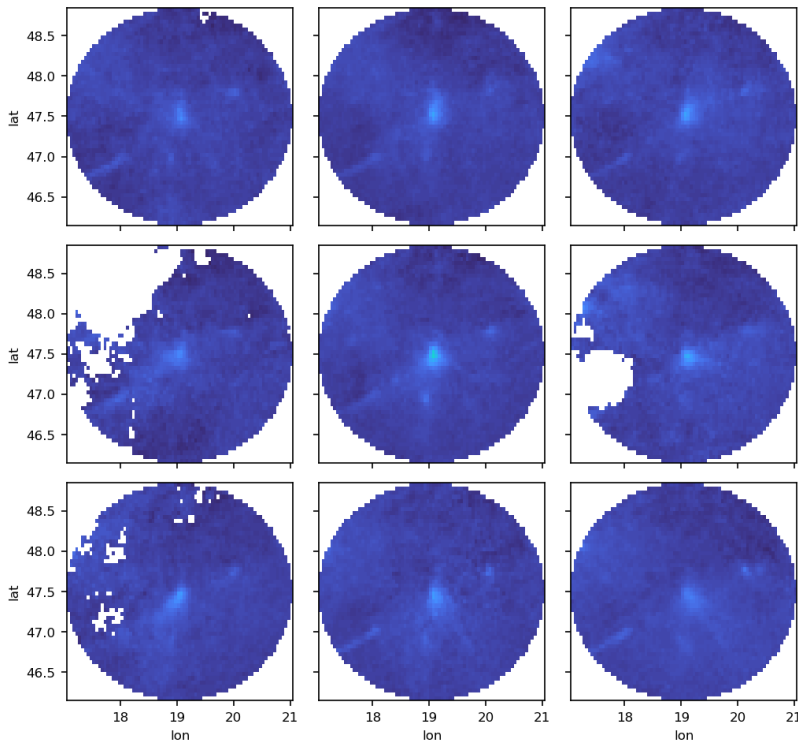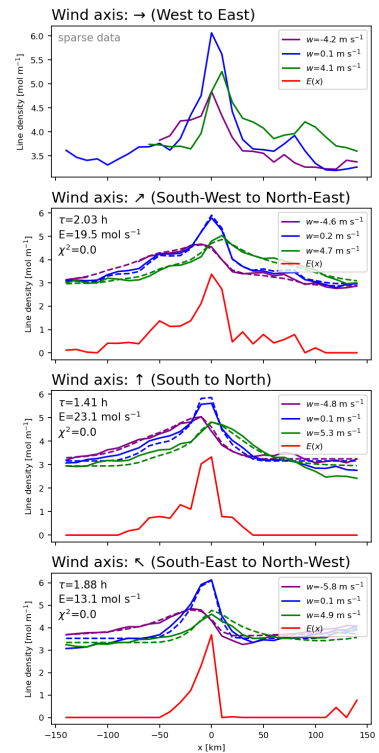

## 65.4 Autumn

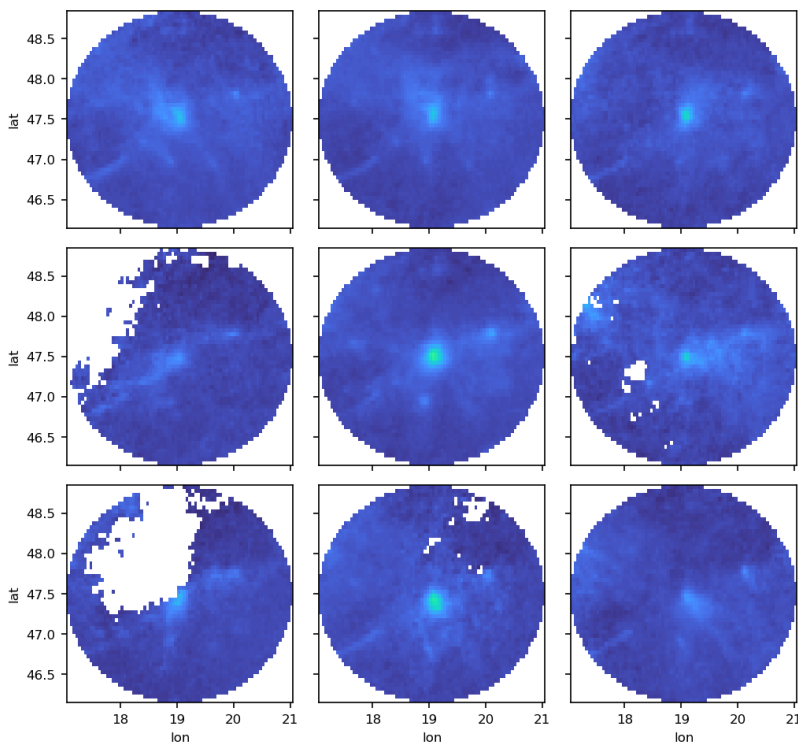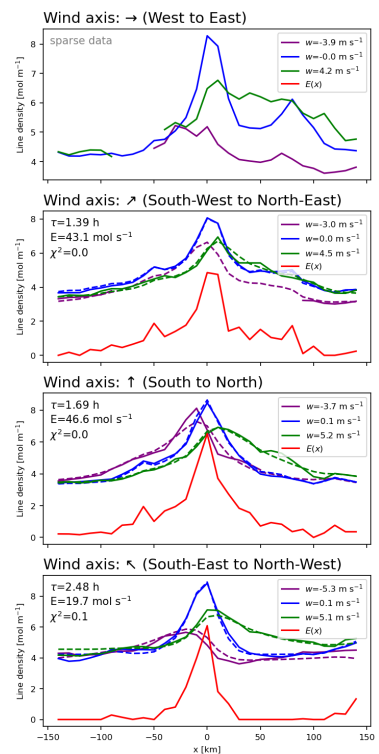

66.1 Winter

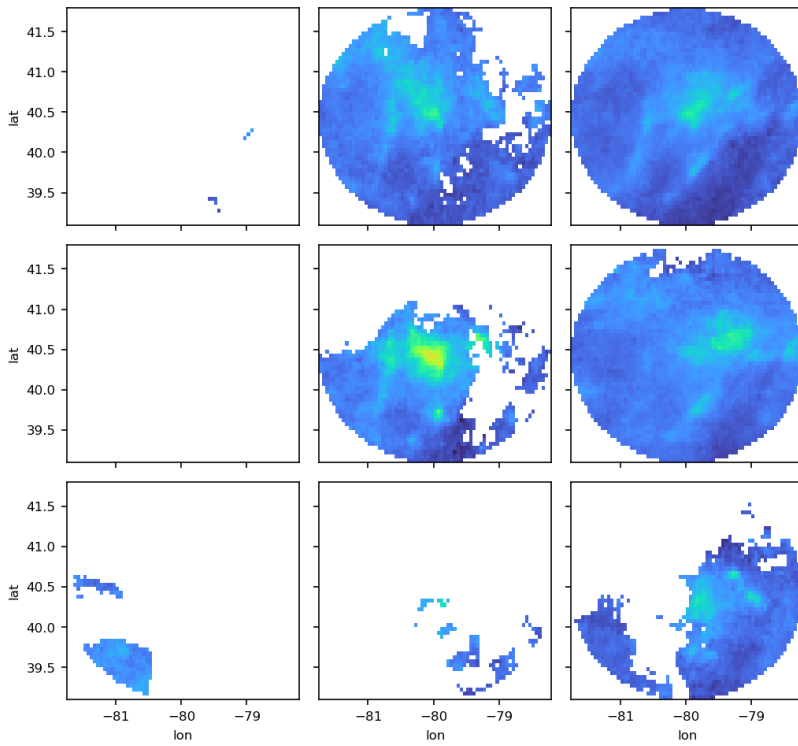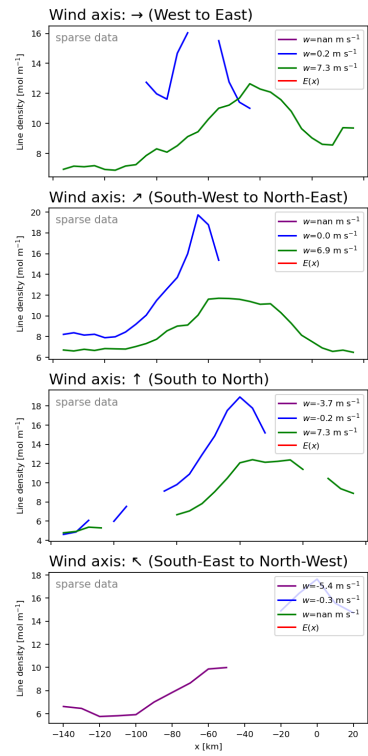

66.2 Spring

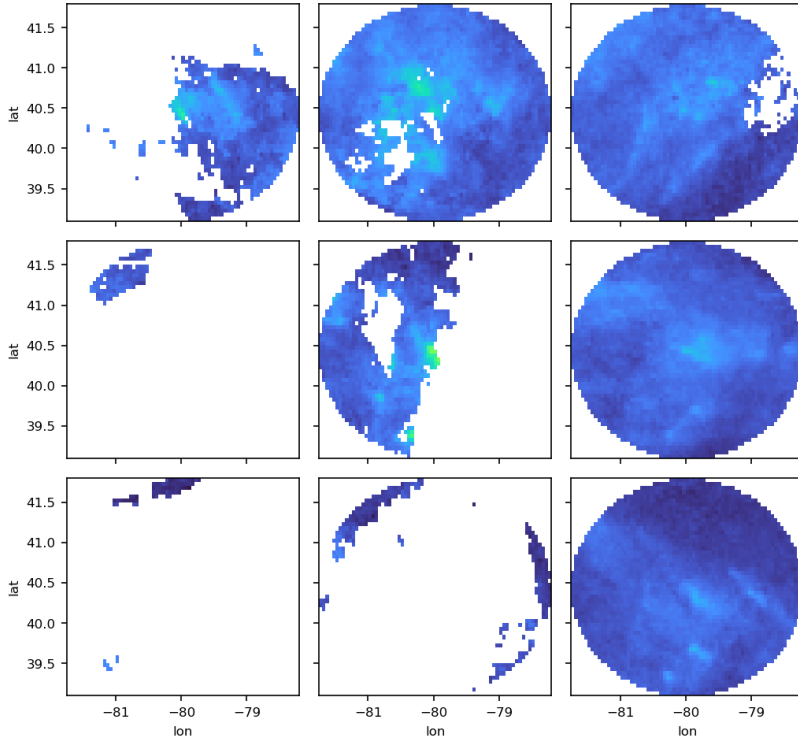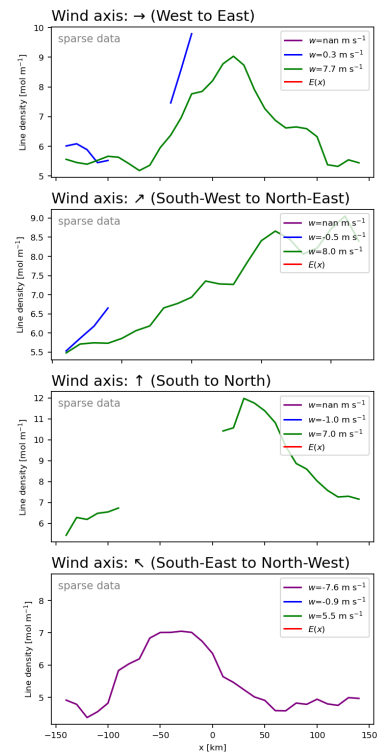

## 66.3 Summer

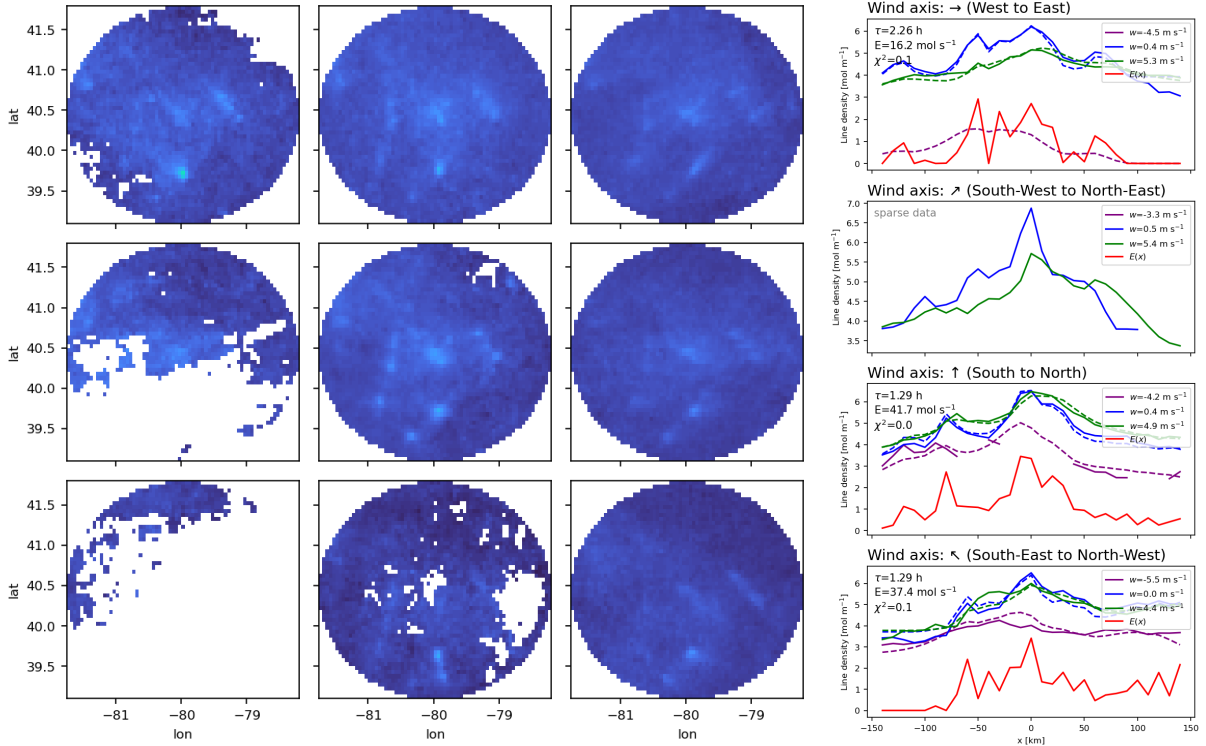

## 66.4 Autumn

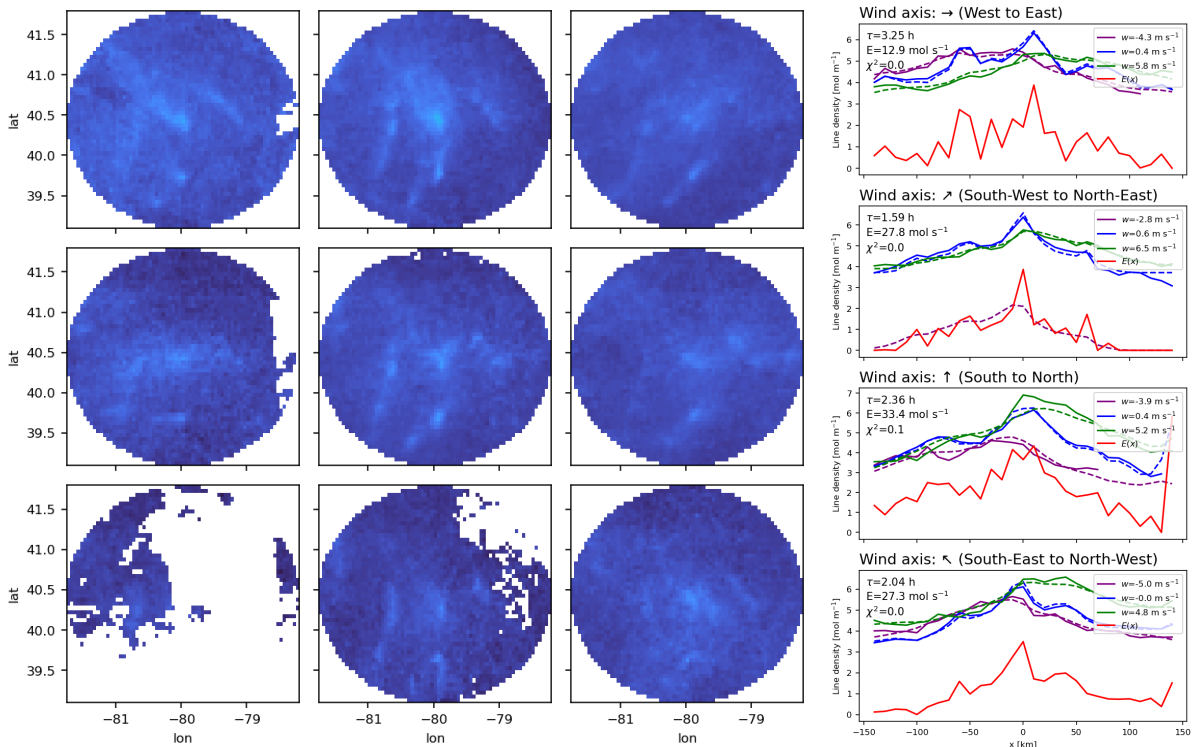

## 67 Cincinnati

### 67.1 Winter

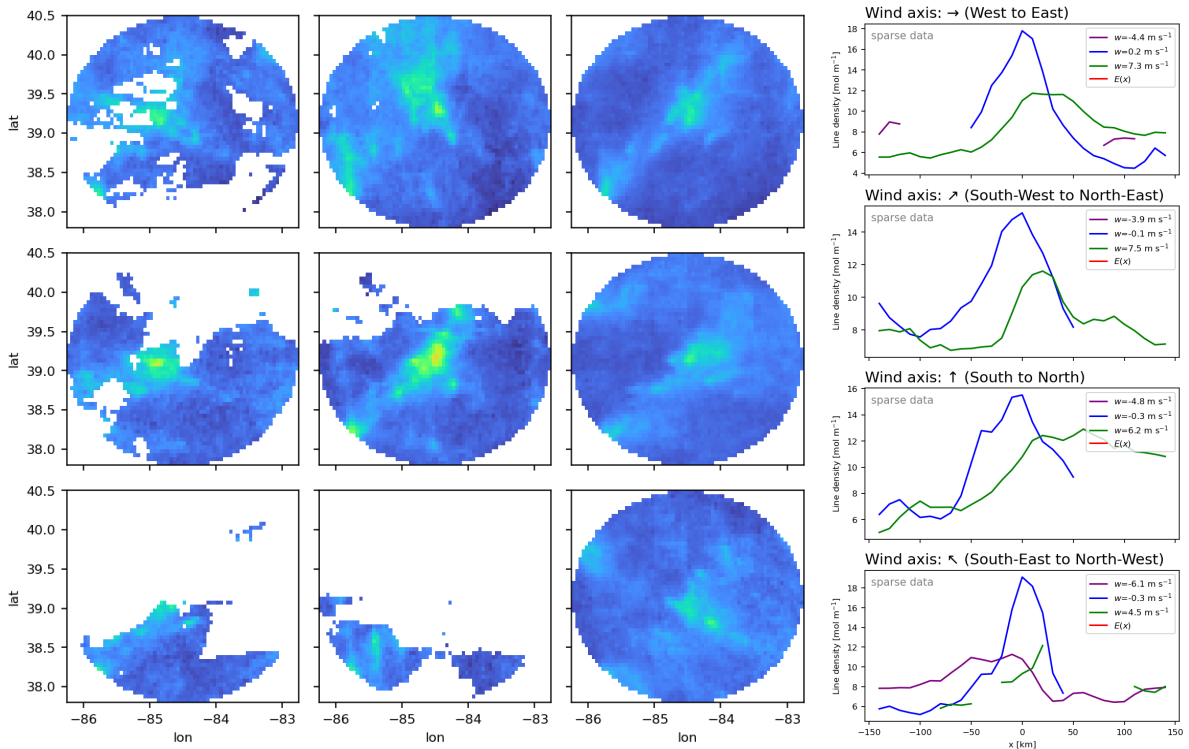

### 67.2 Spring

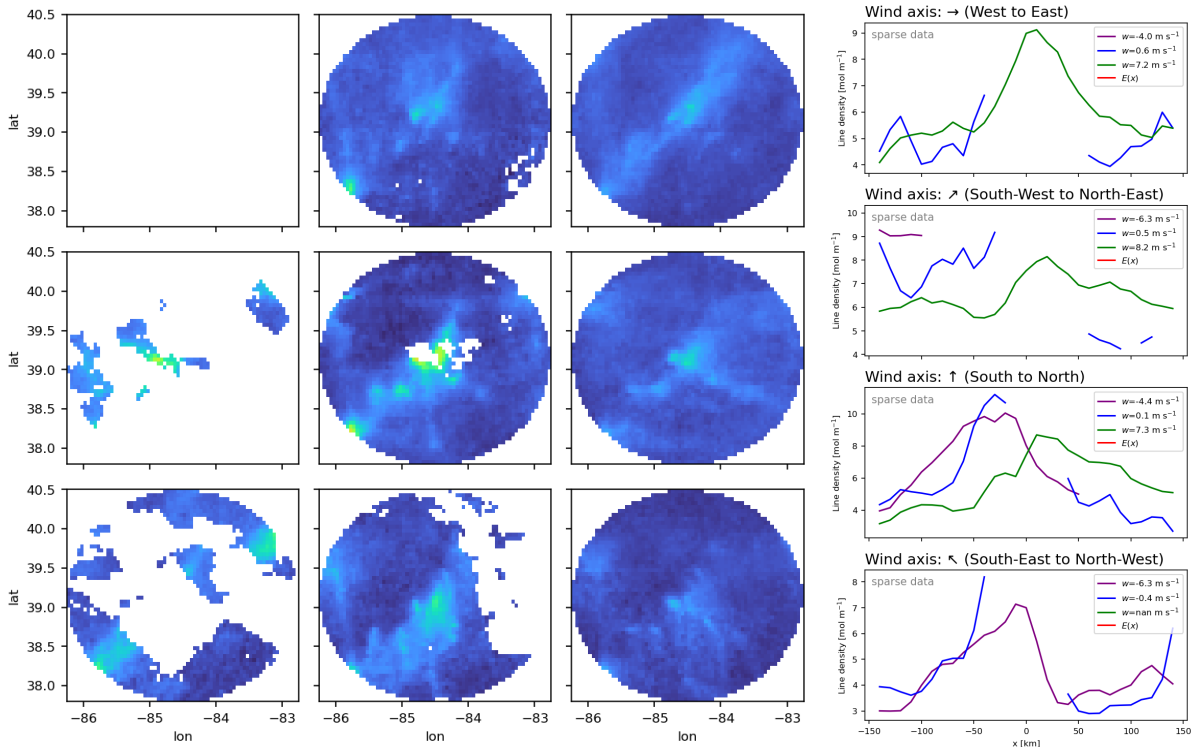

### 67.3 Summer

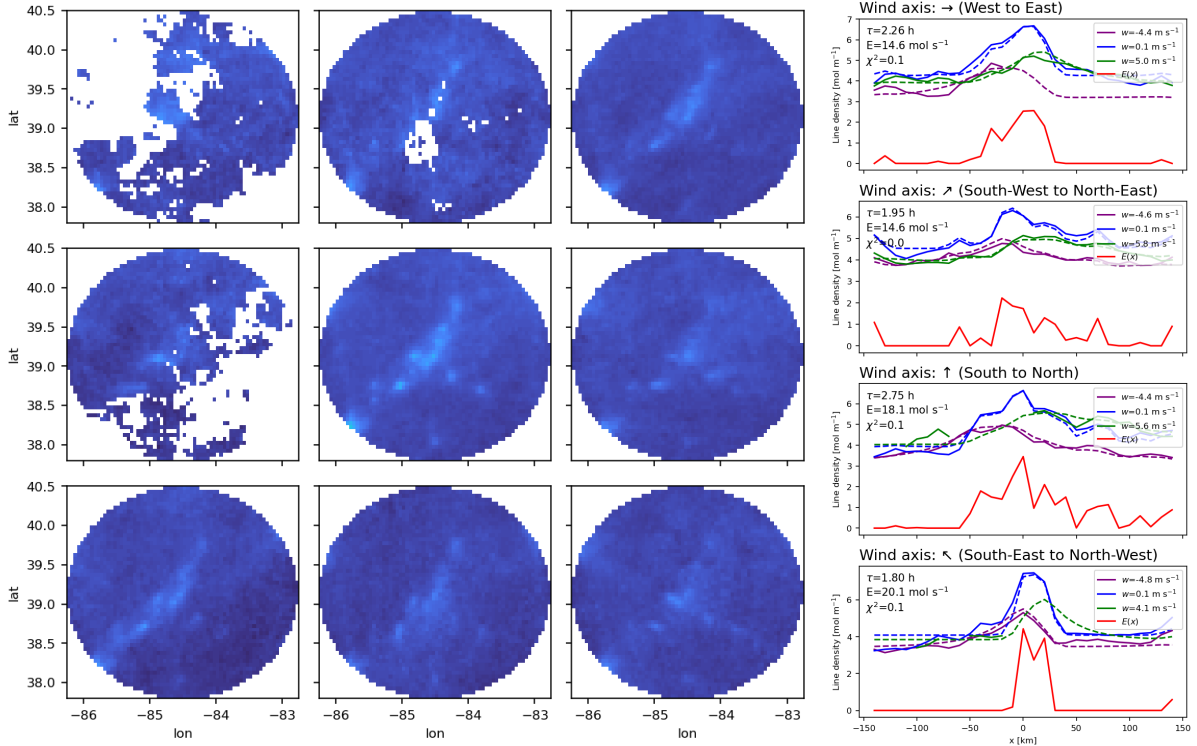

### 67.4 Autumn

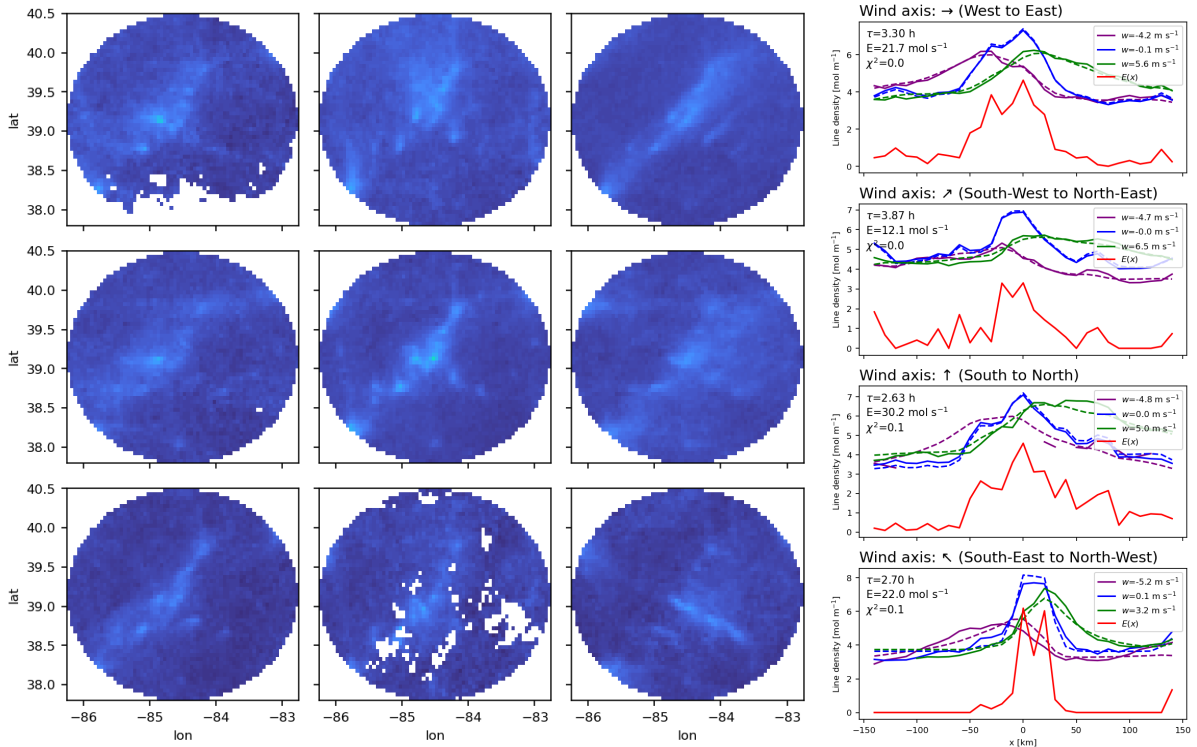



68.1 Winter

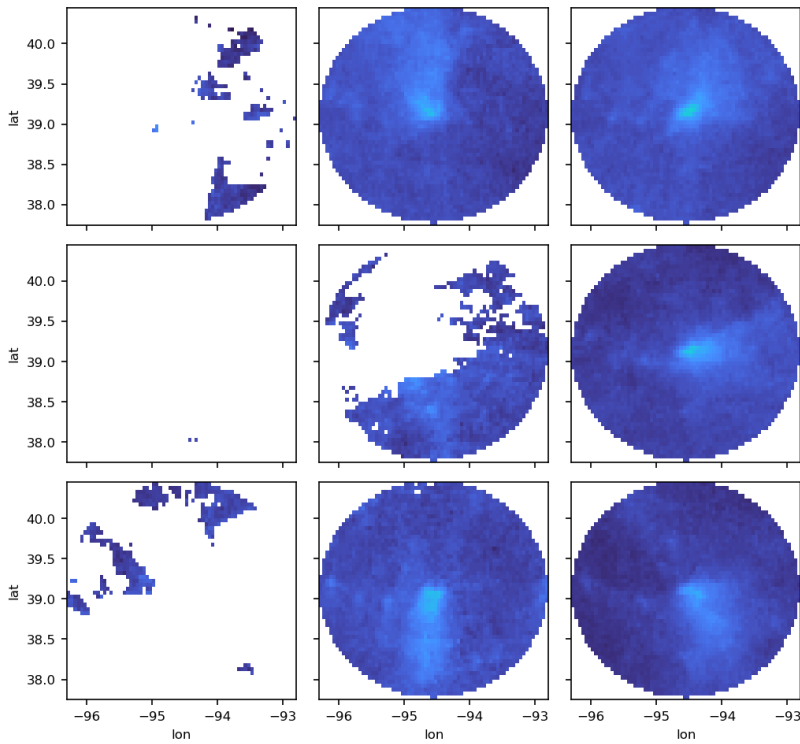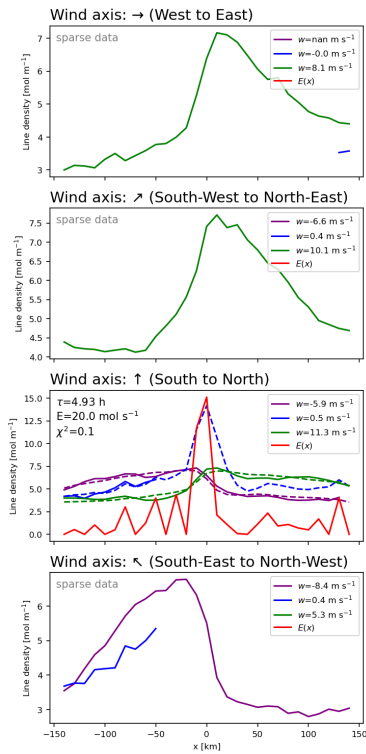

68.2 Spring

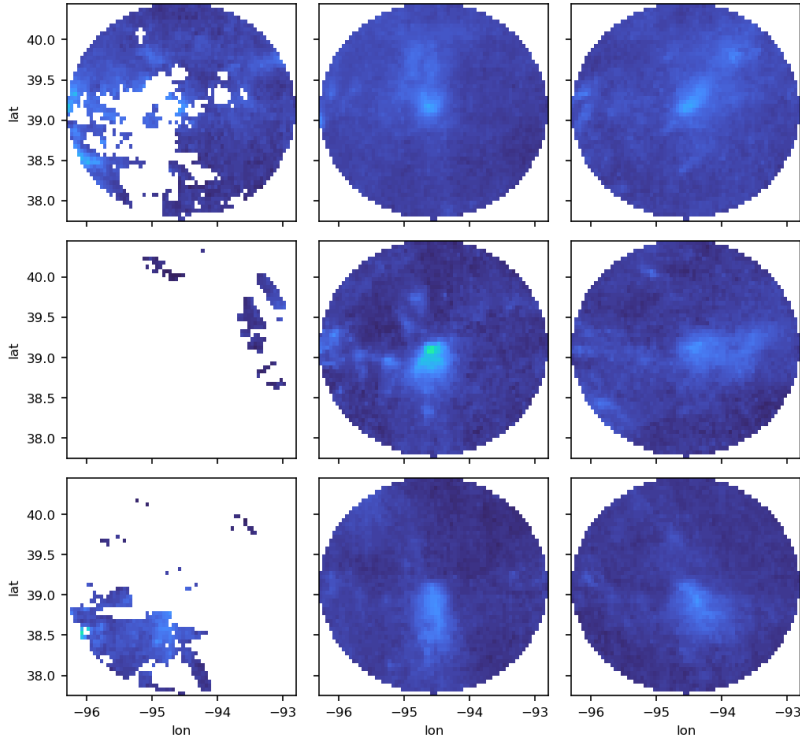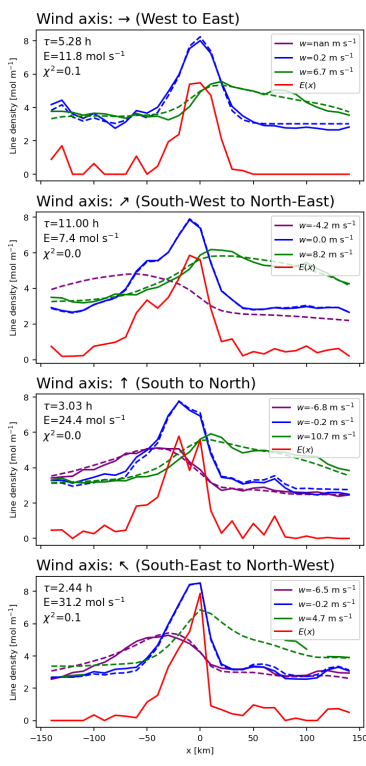

### 68.3 Summer

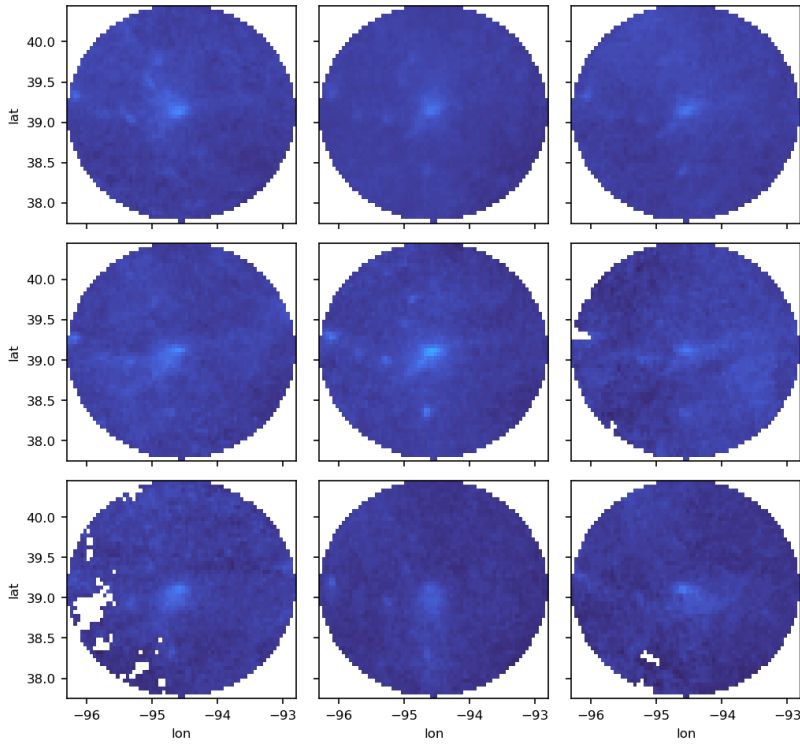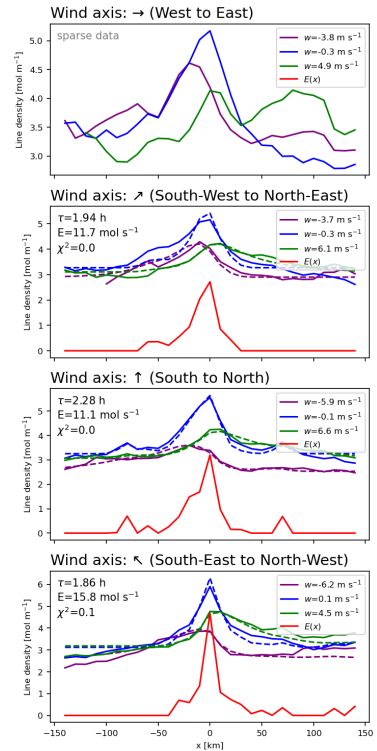

### 68.4 Autumn

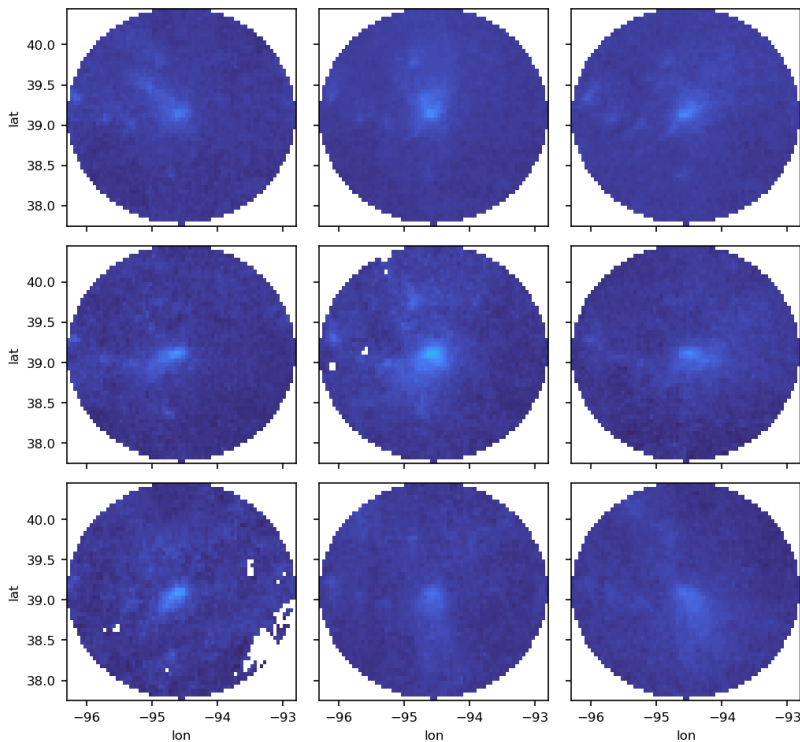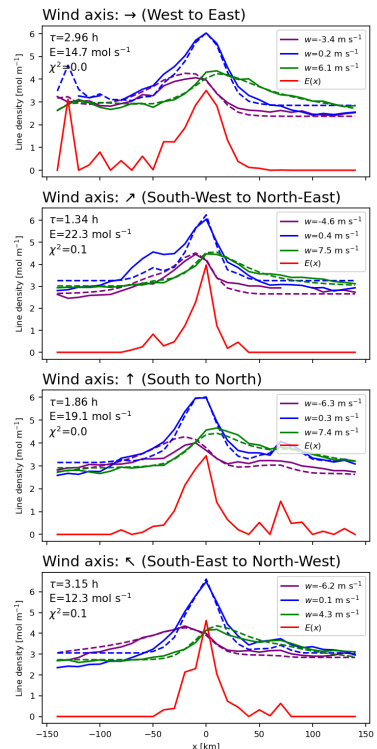

## 69 Manhattan

### 69.1 Winter

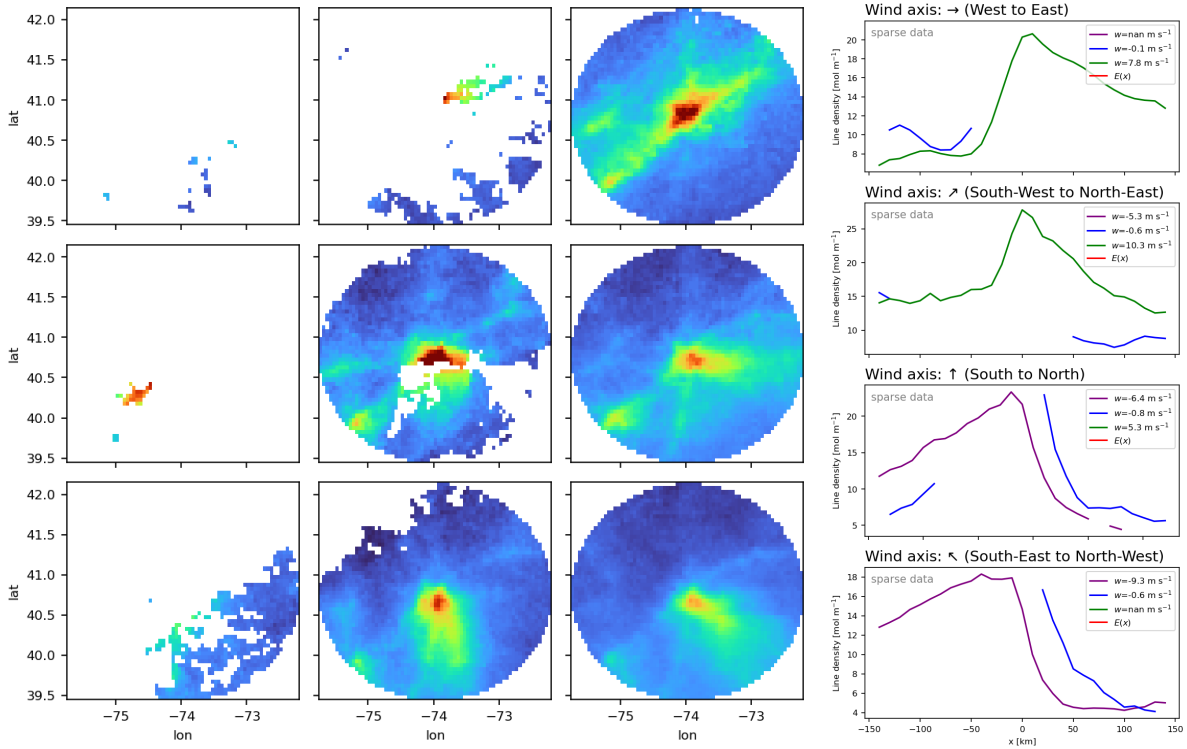

### 69.2 Spring

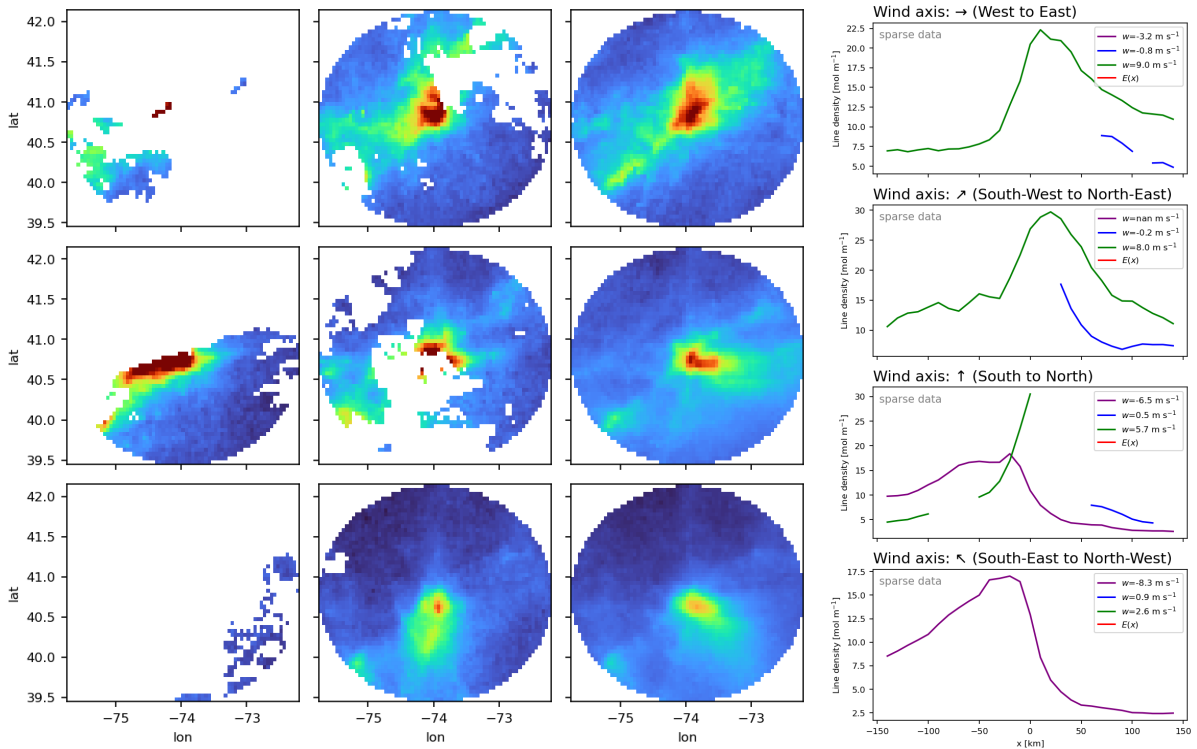

## 69.3 Summer

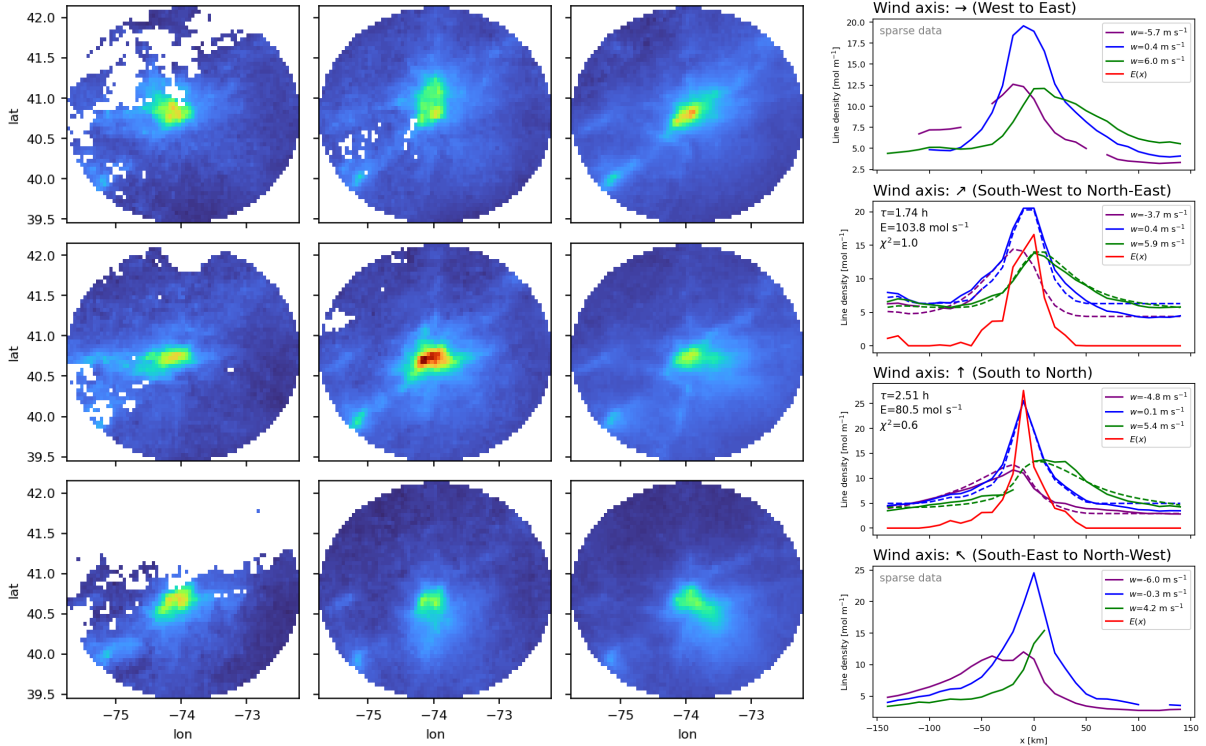

## 69.4 Autumn

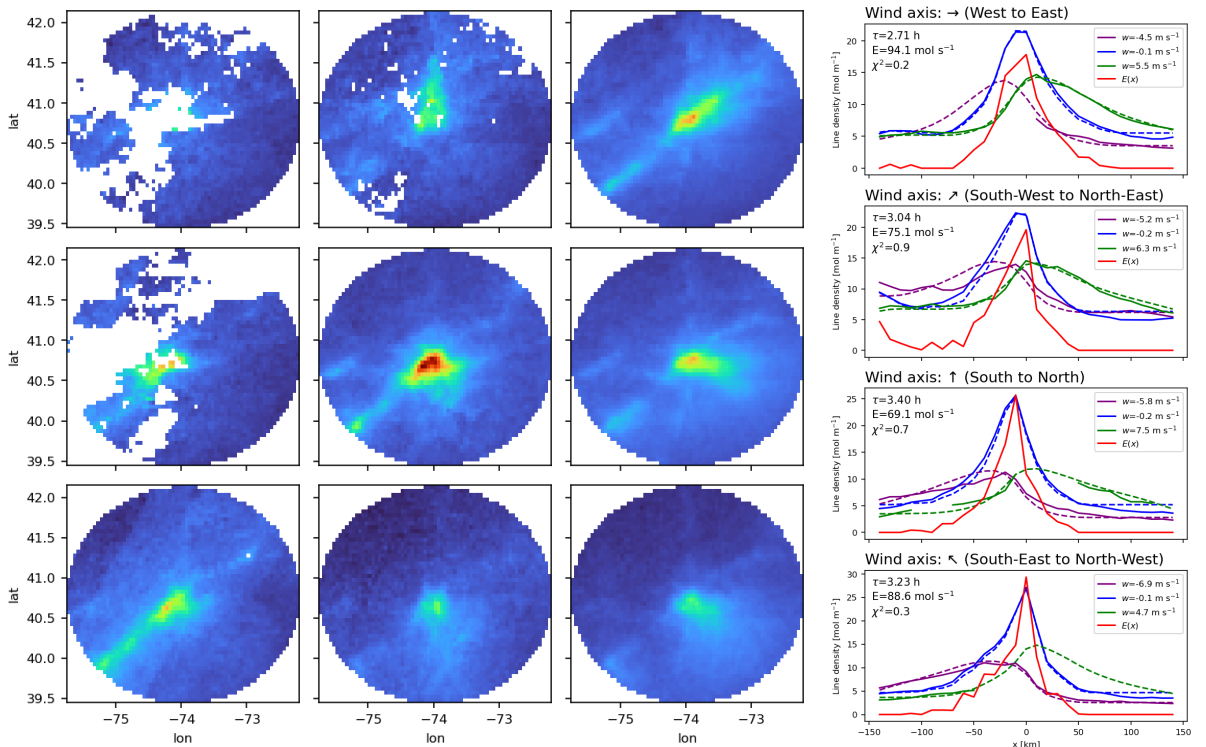

70.1 Winter

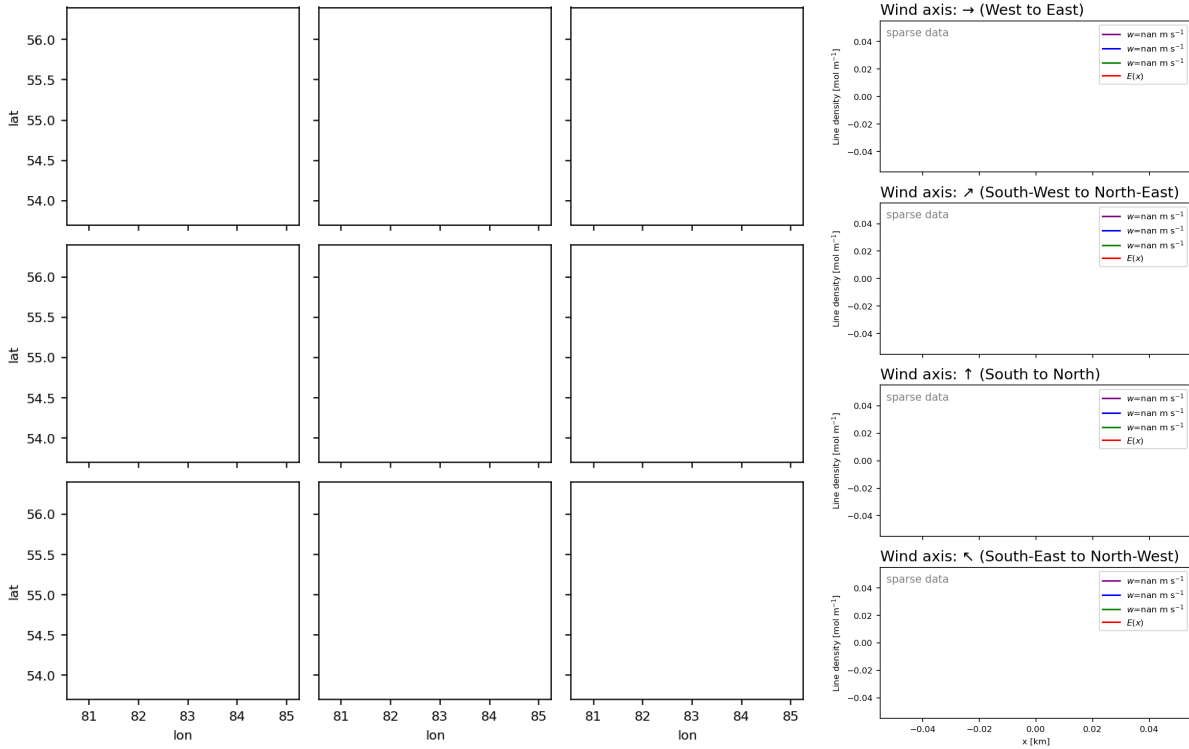

70.2 Spring

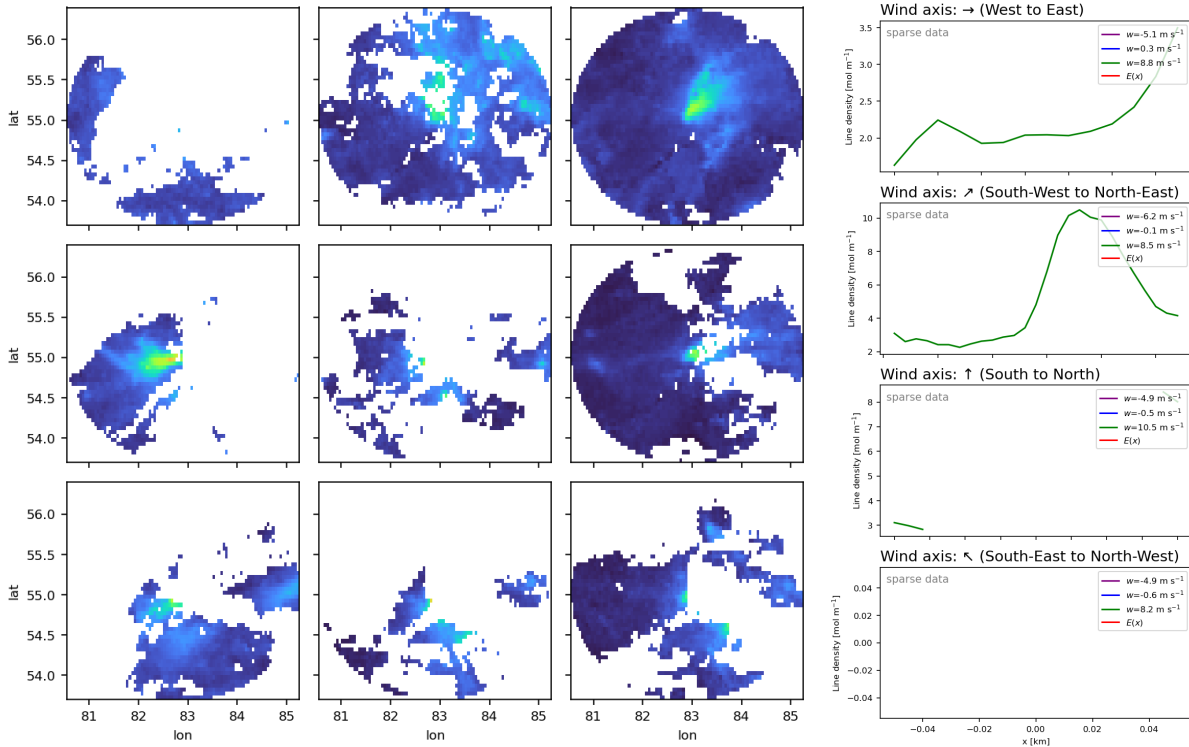

## 70.3 Summer

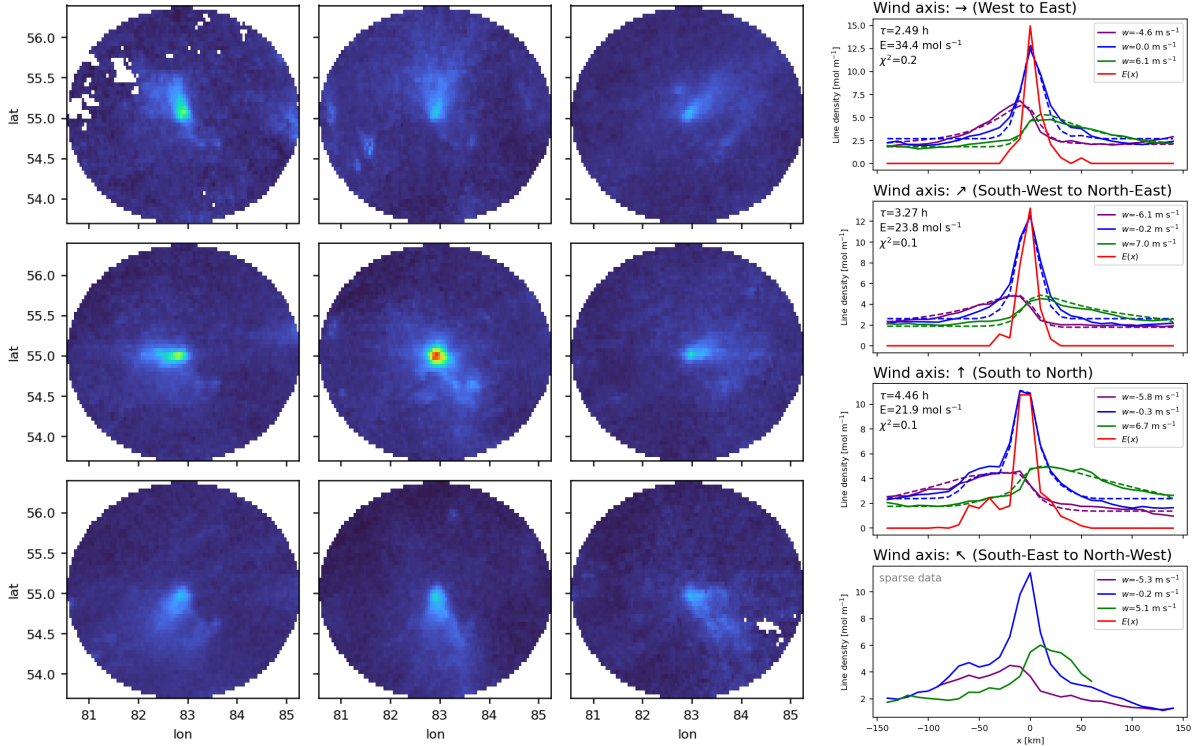

## 70.4 Autumn

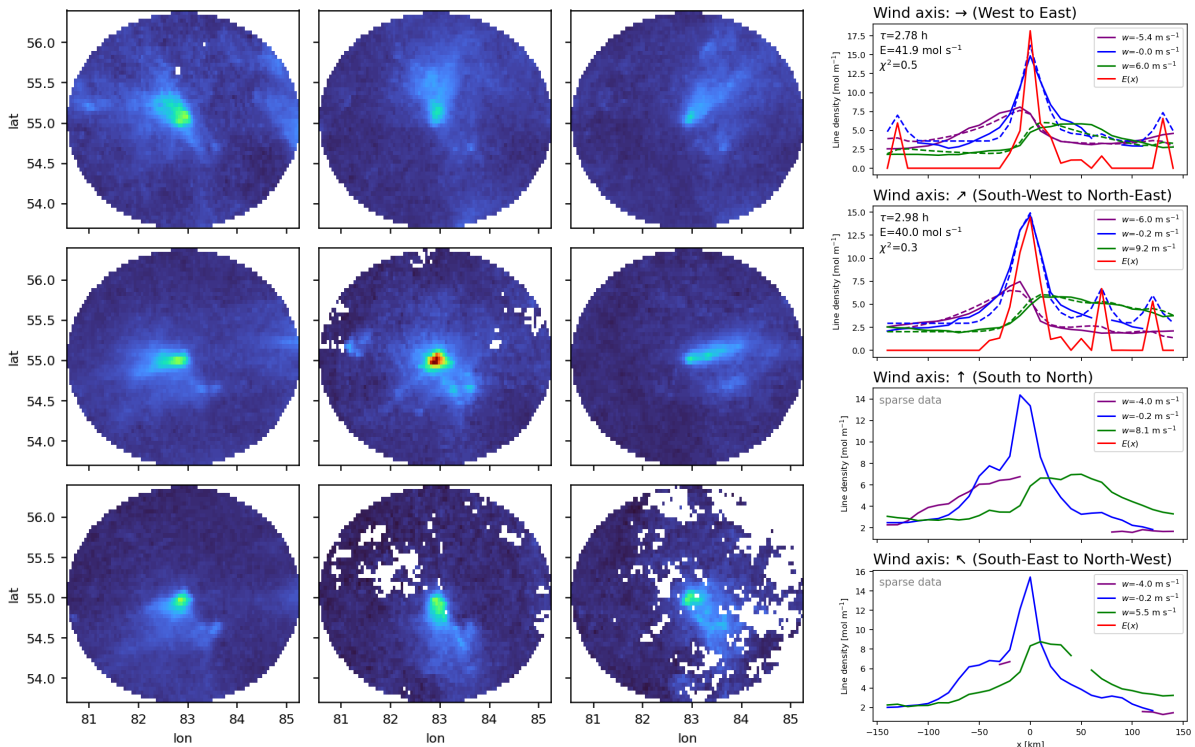

# 71 Charlotte

## 71.1 Winter

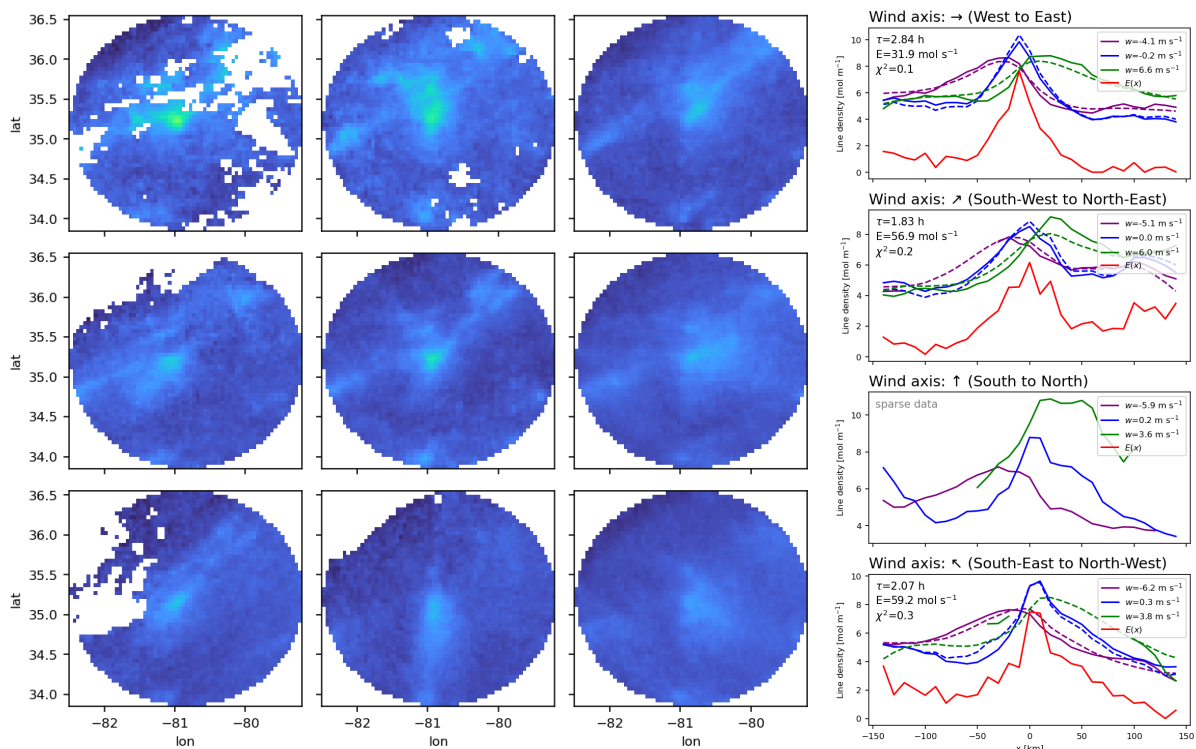

## 71.2 Spring

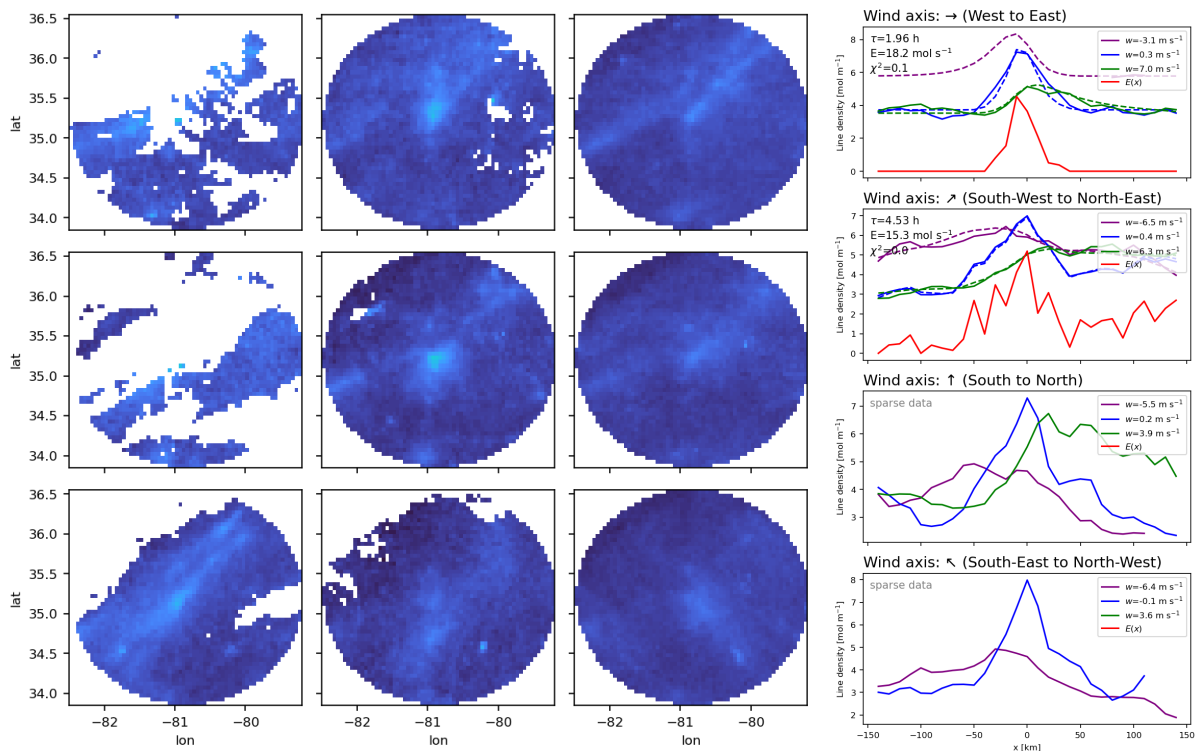

### 71.3 Summer

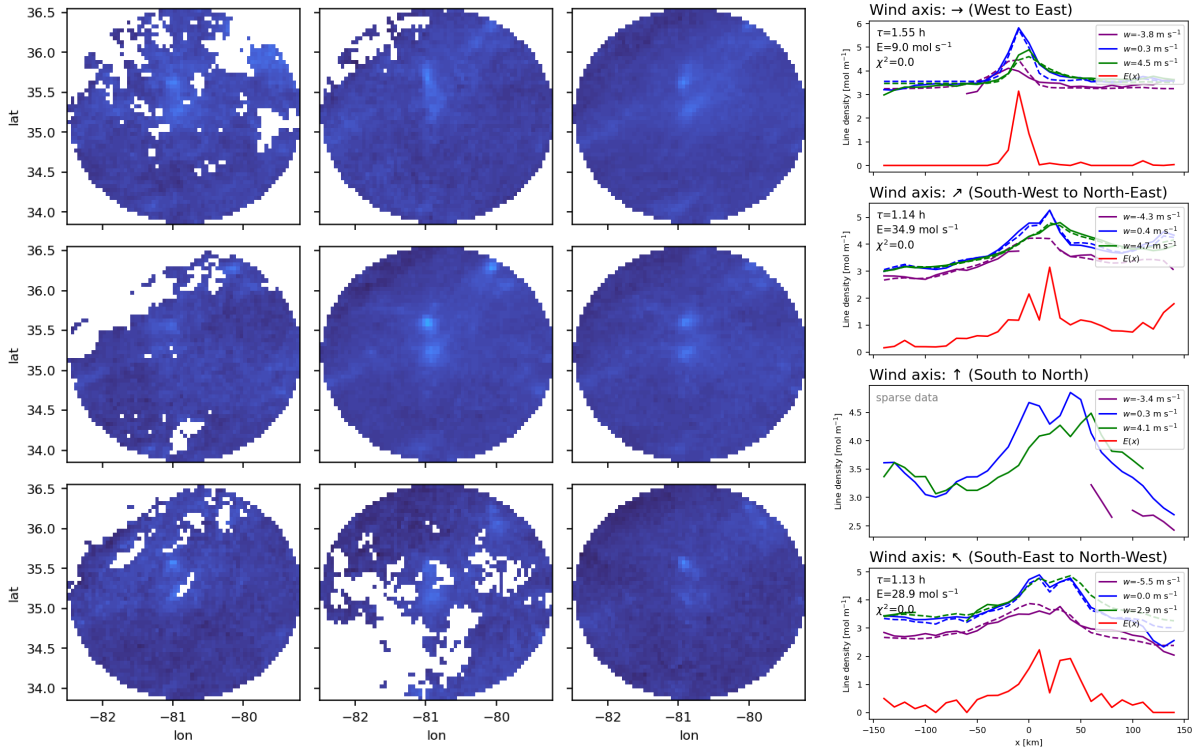

### 71.4 Autumn

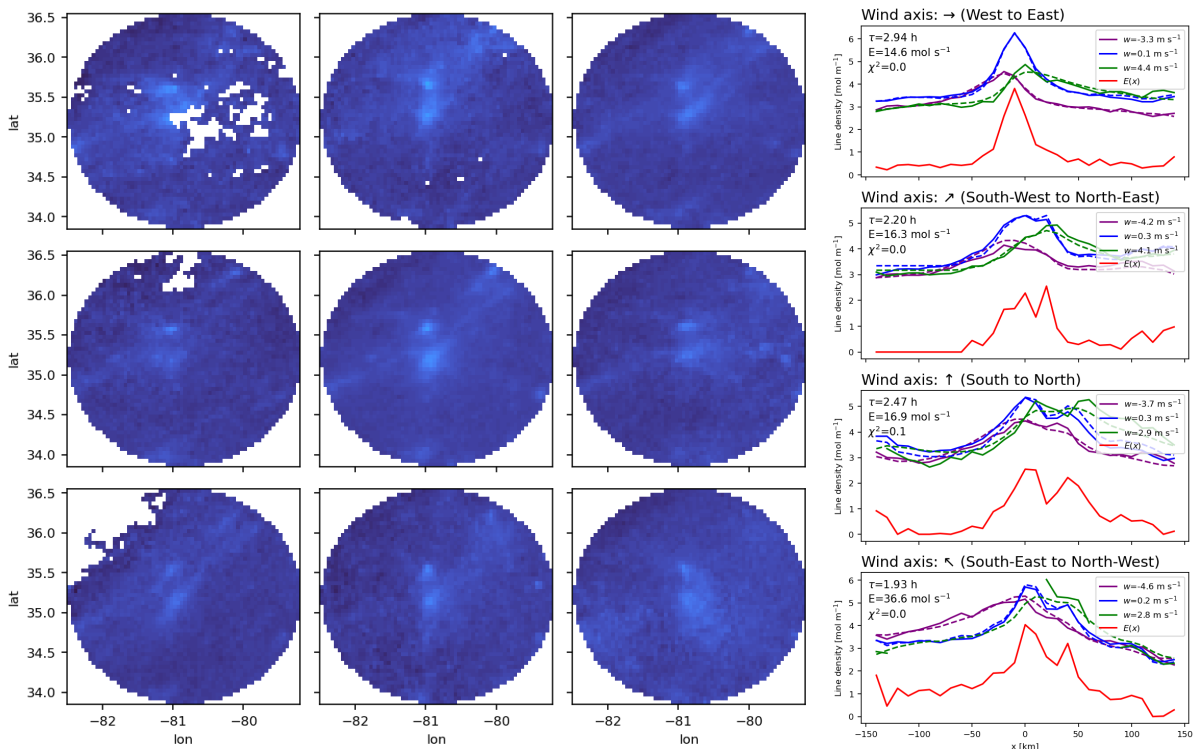



72.1 Winter

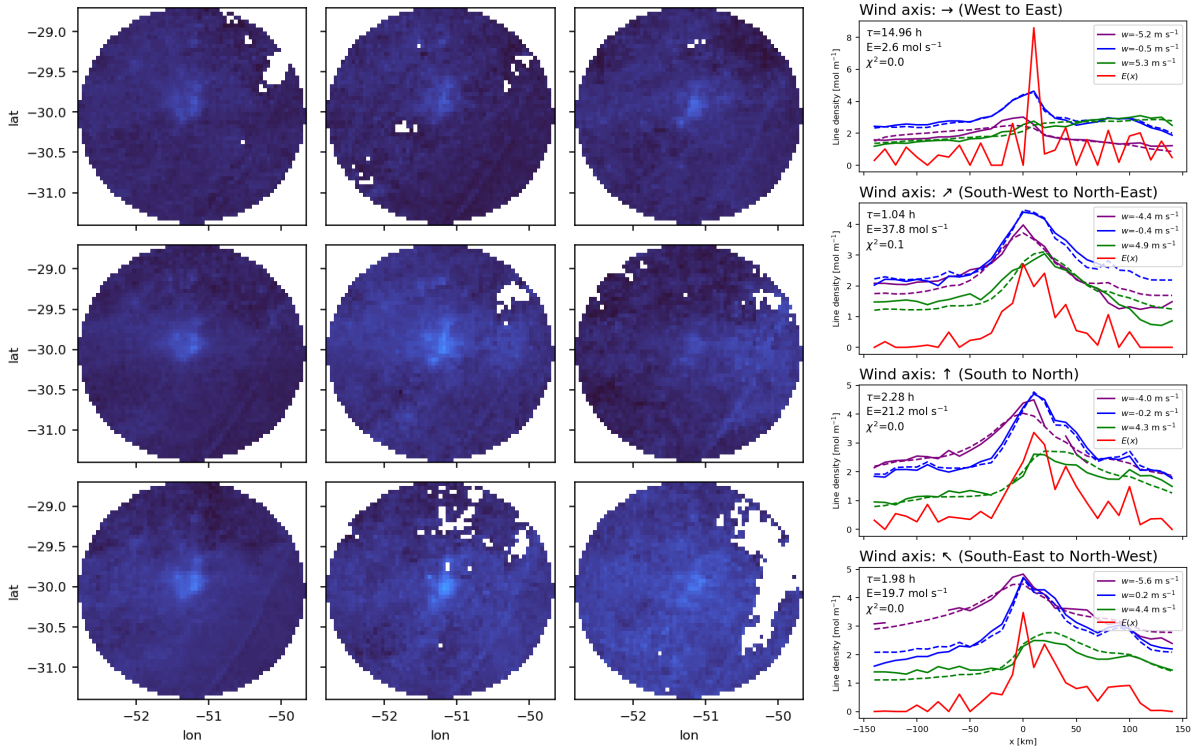

72.2 Spring

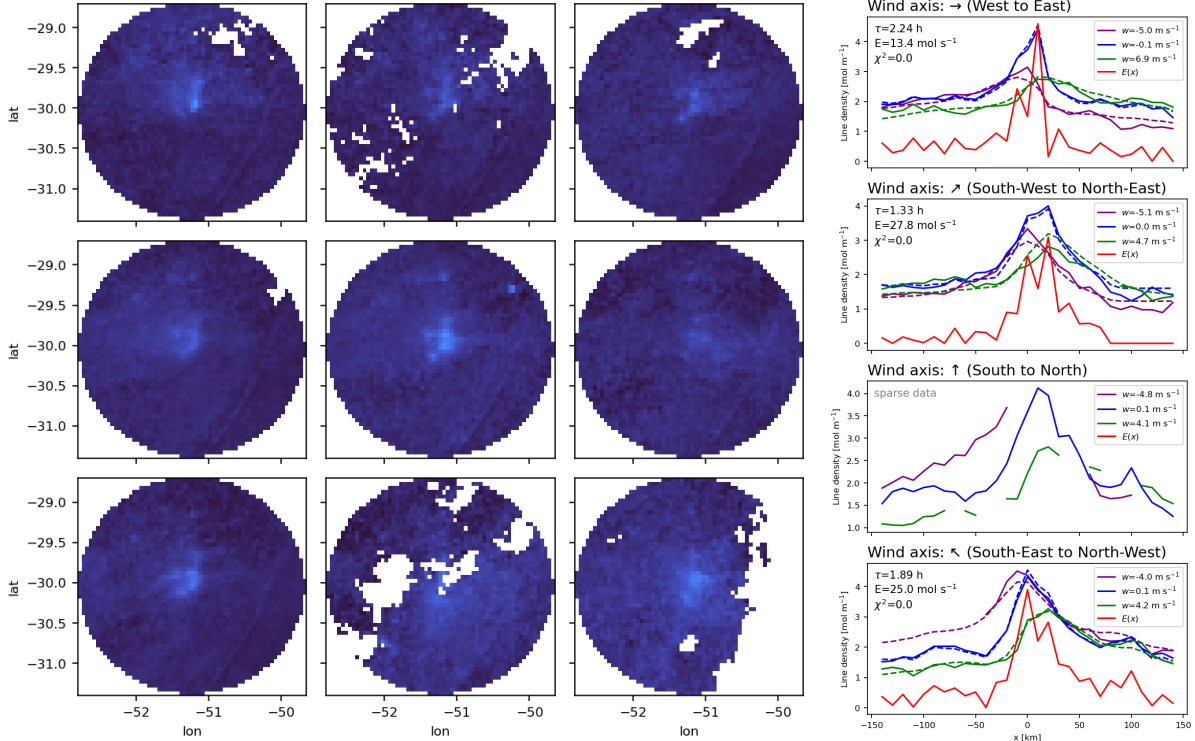

## 72.3 Summer

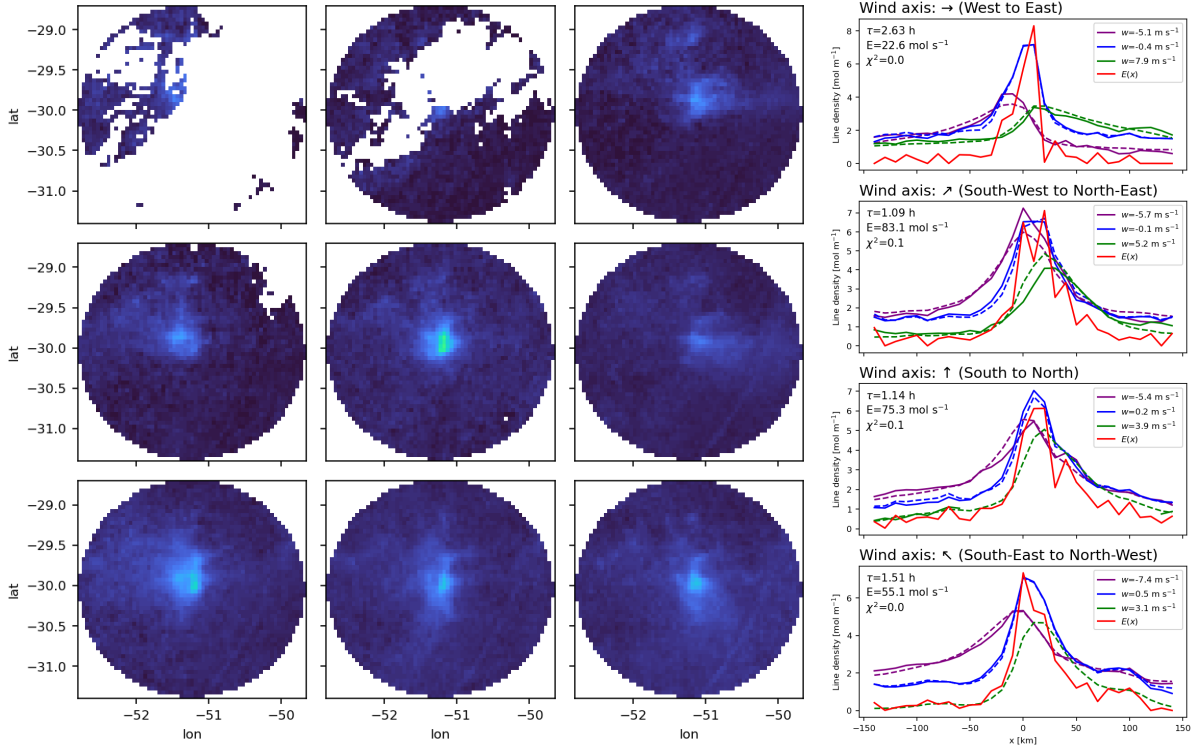

## 72.4 Autumn

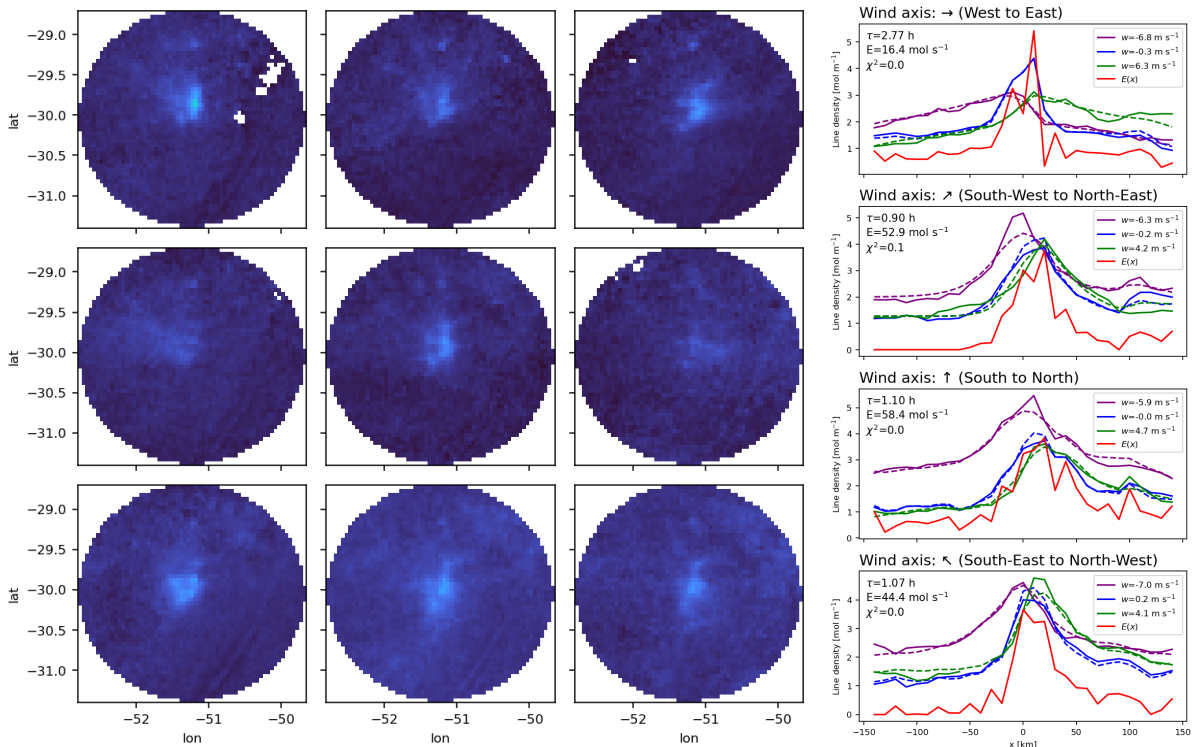

73.1 Winter

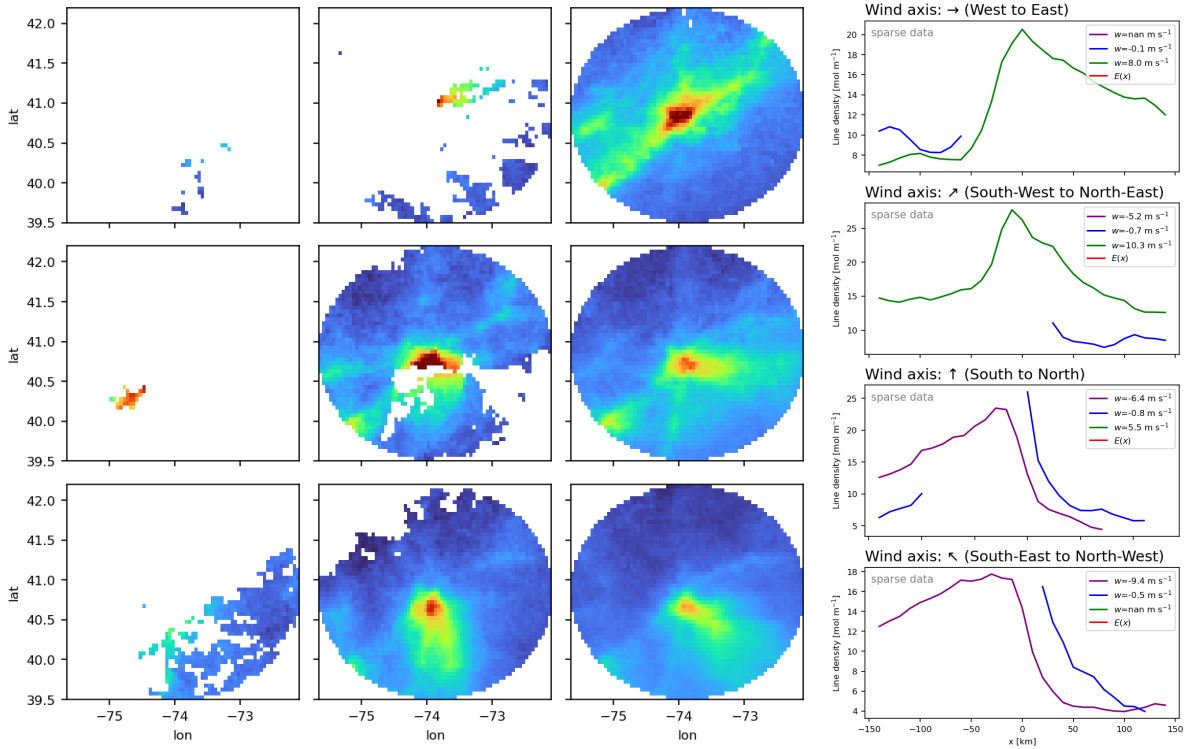

73.2 Spring

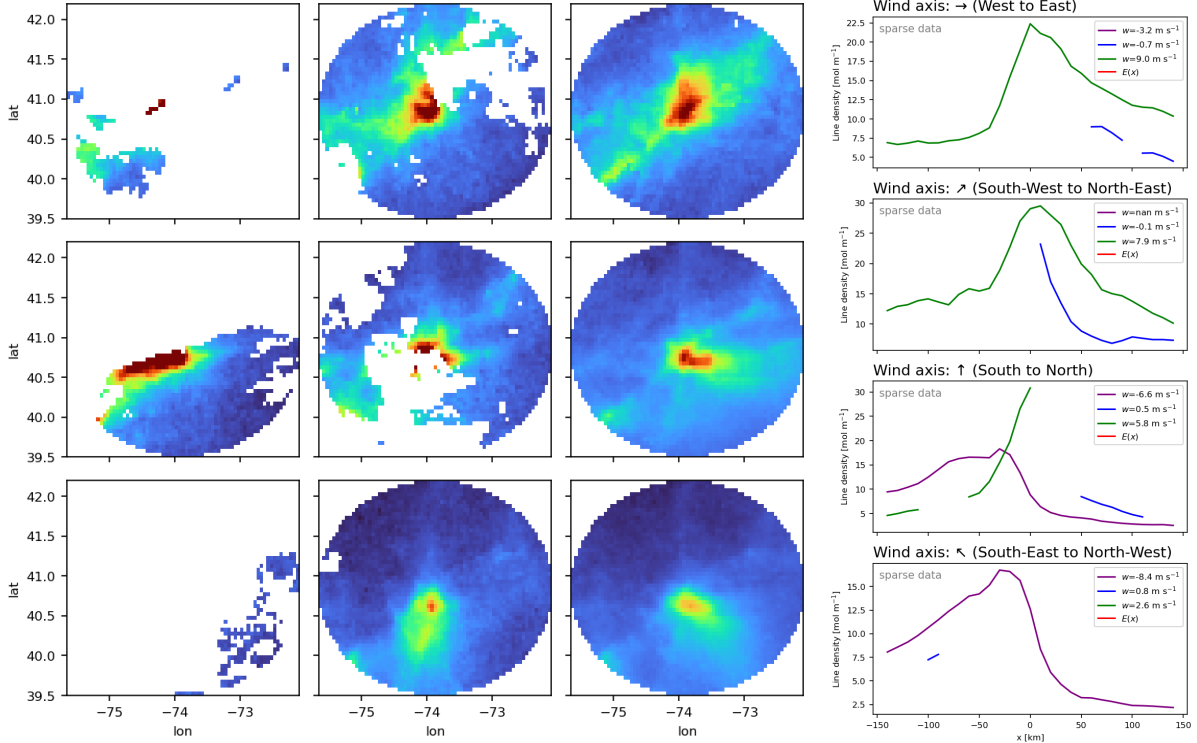

### 73.3 Summer

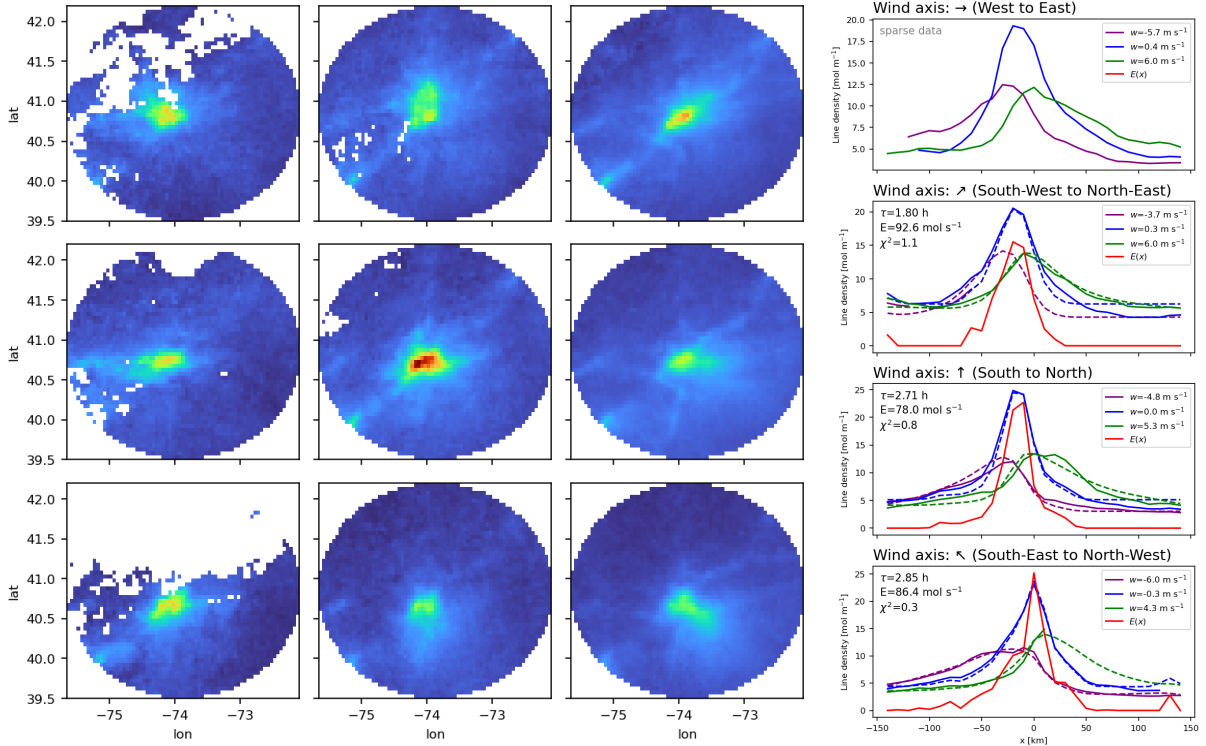

### 73.4 Autumn

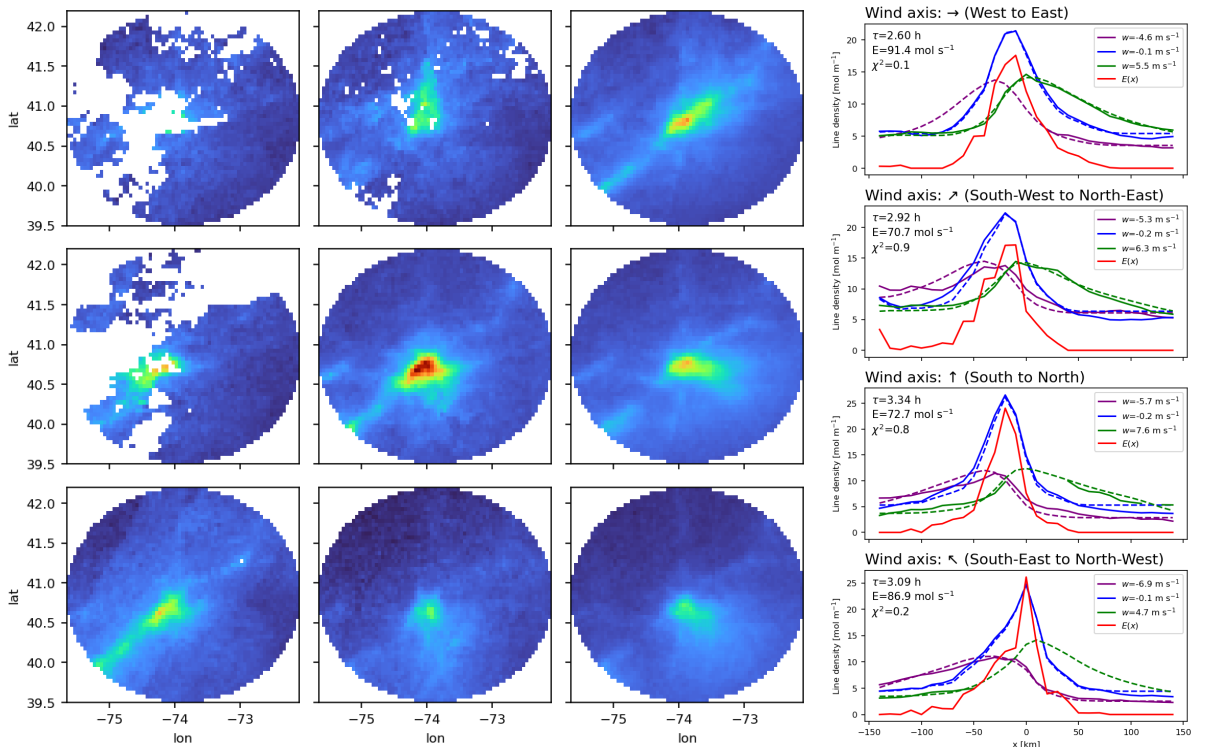

74.1 Winter

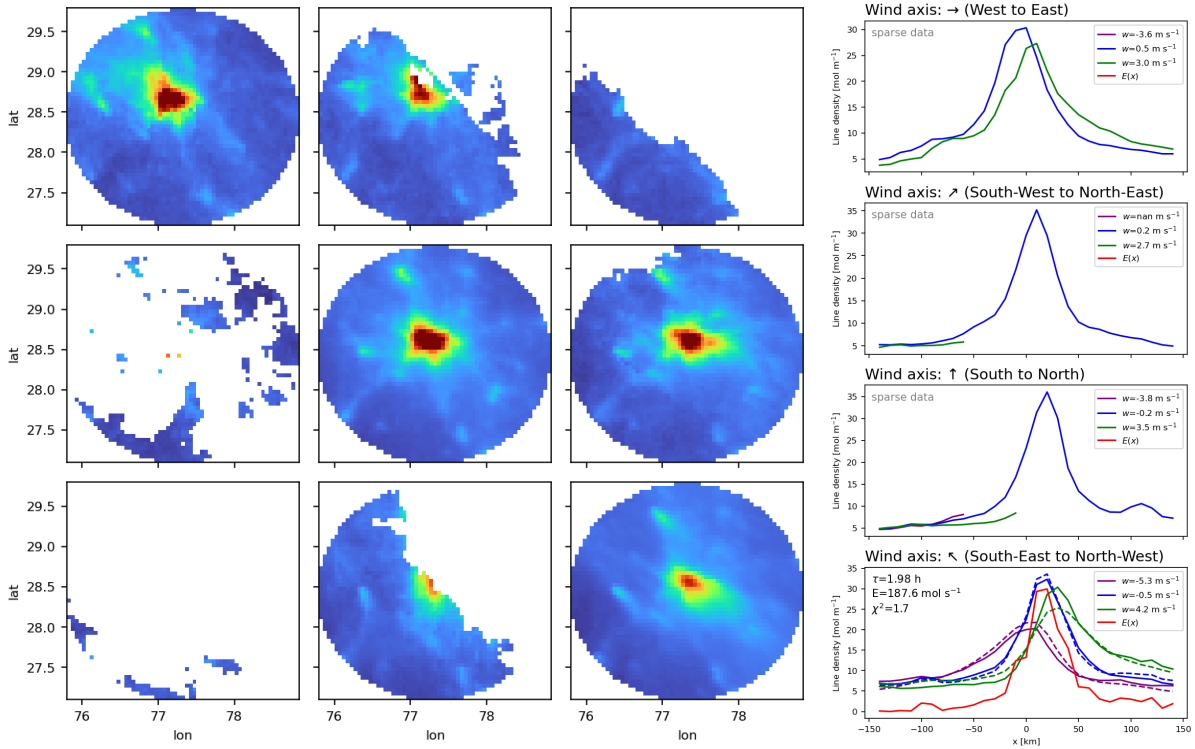

74.2 Spring

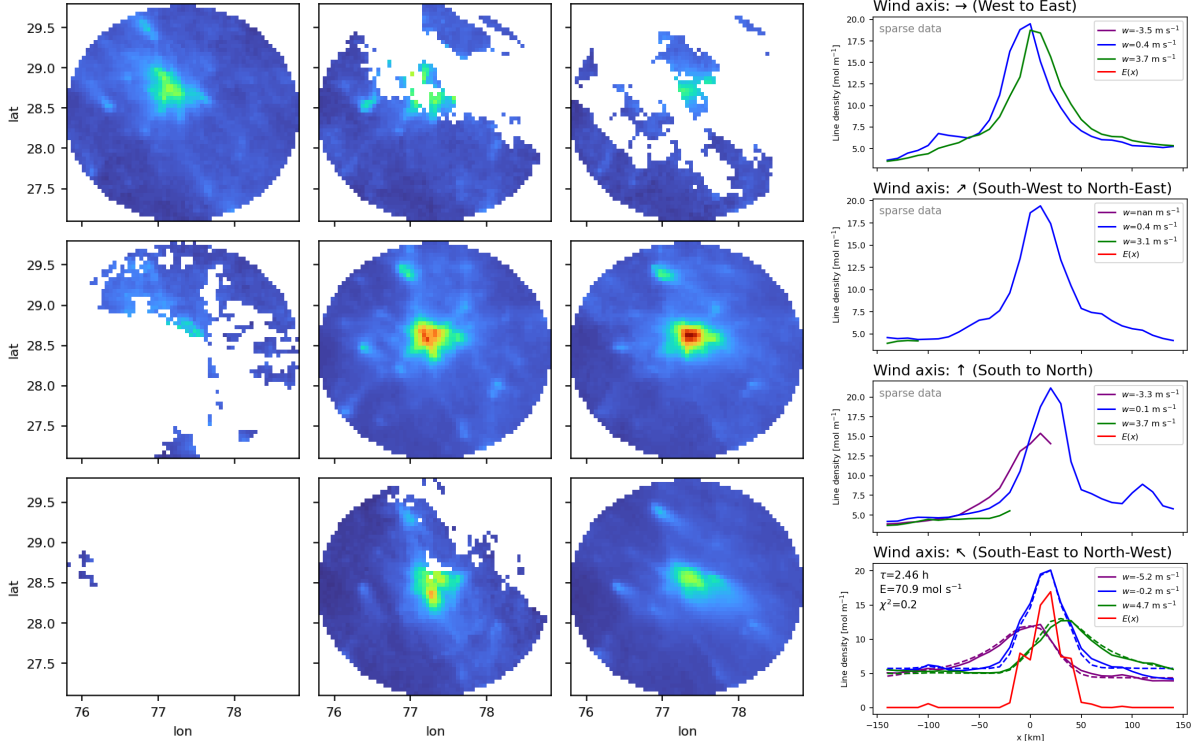

### 74.3 Summer

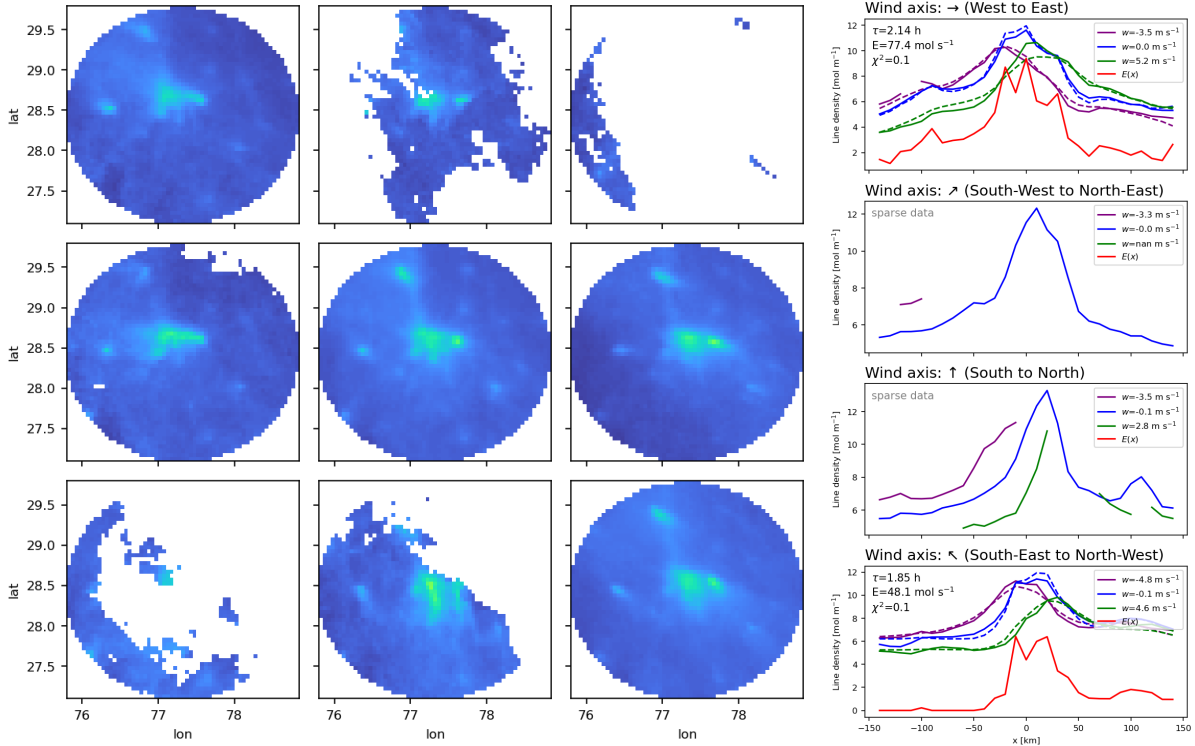

### 74.4 Autumn

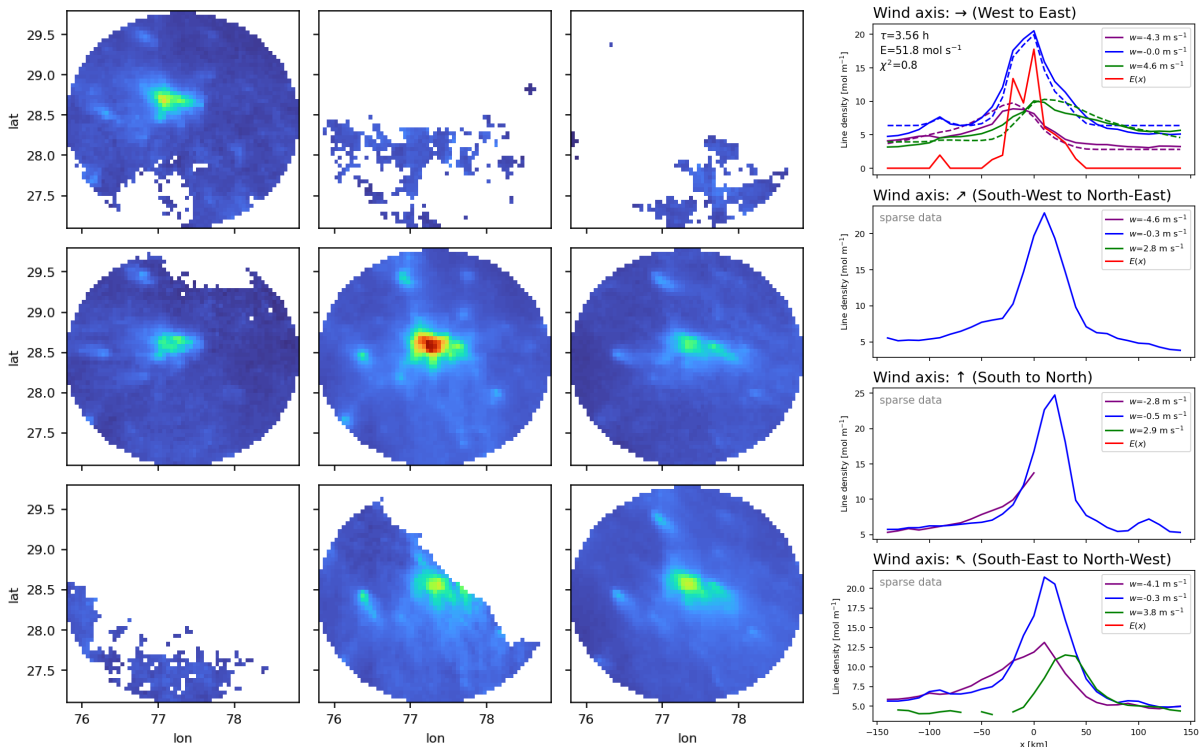

75.1 Winter

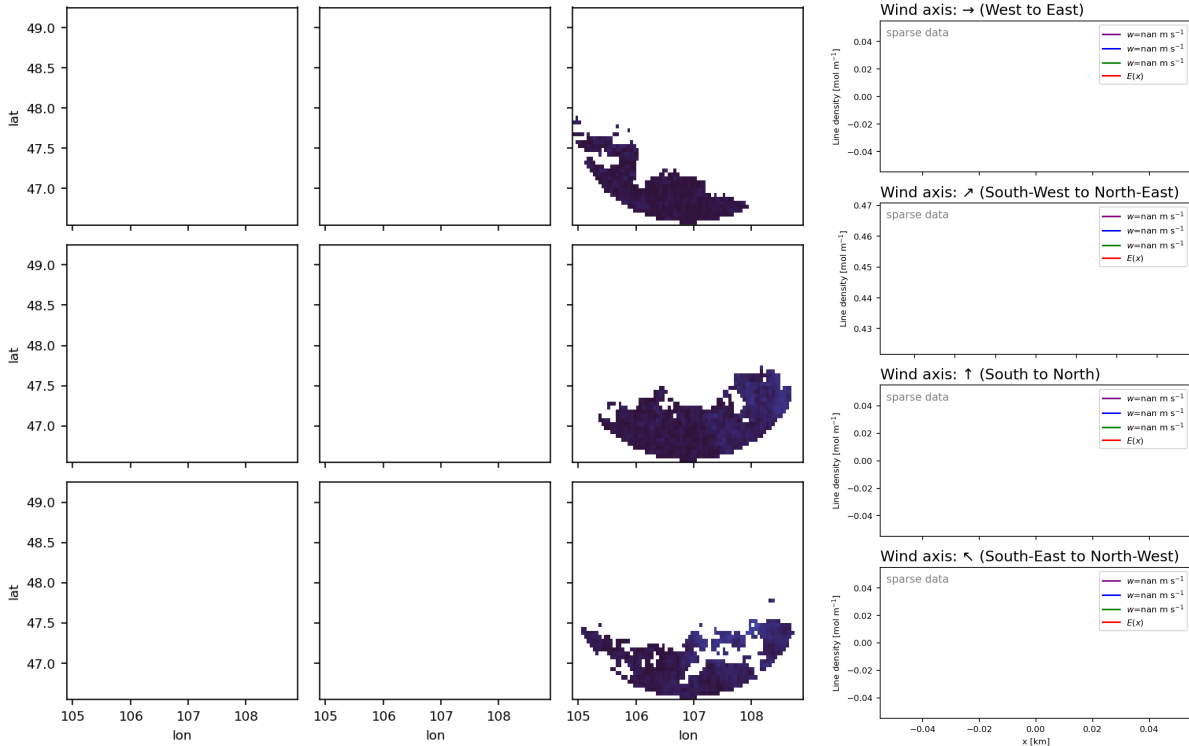

75.2 Spring

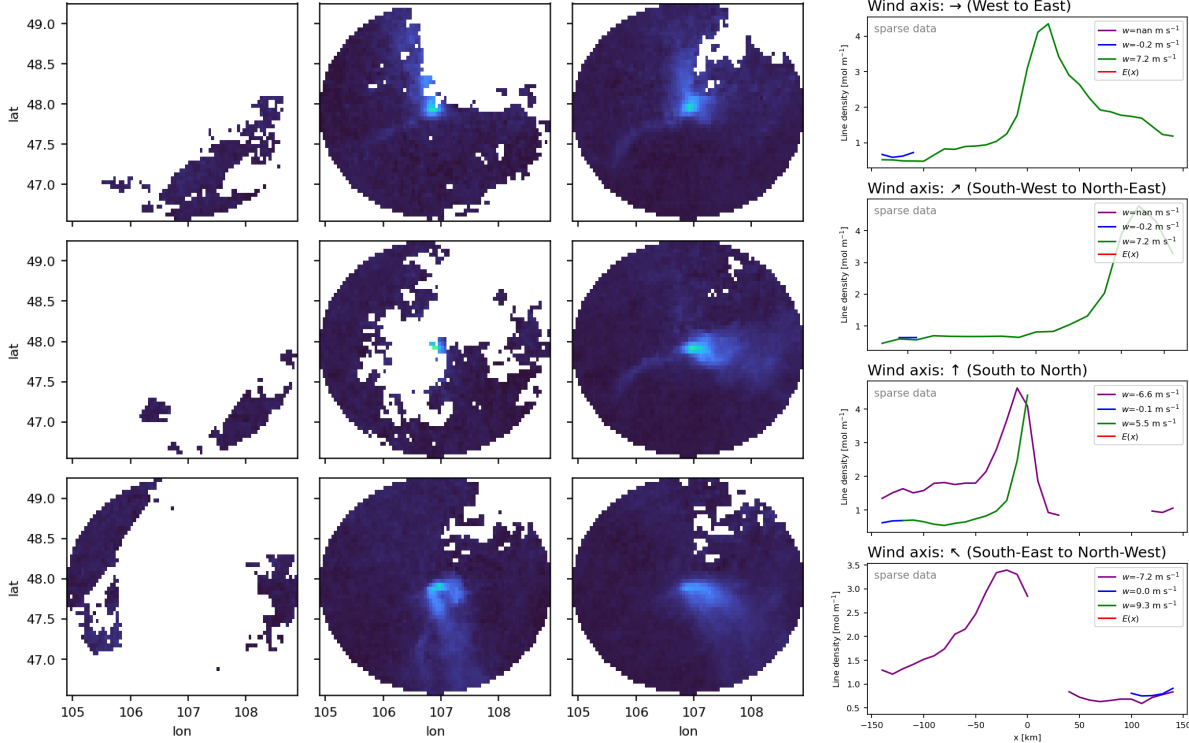

## 75.3 Summer

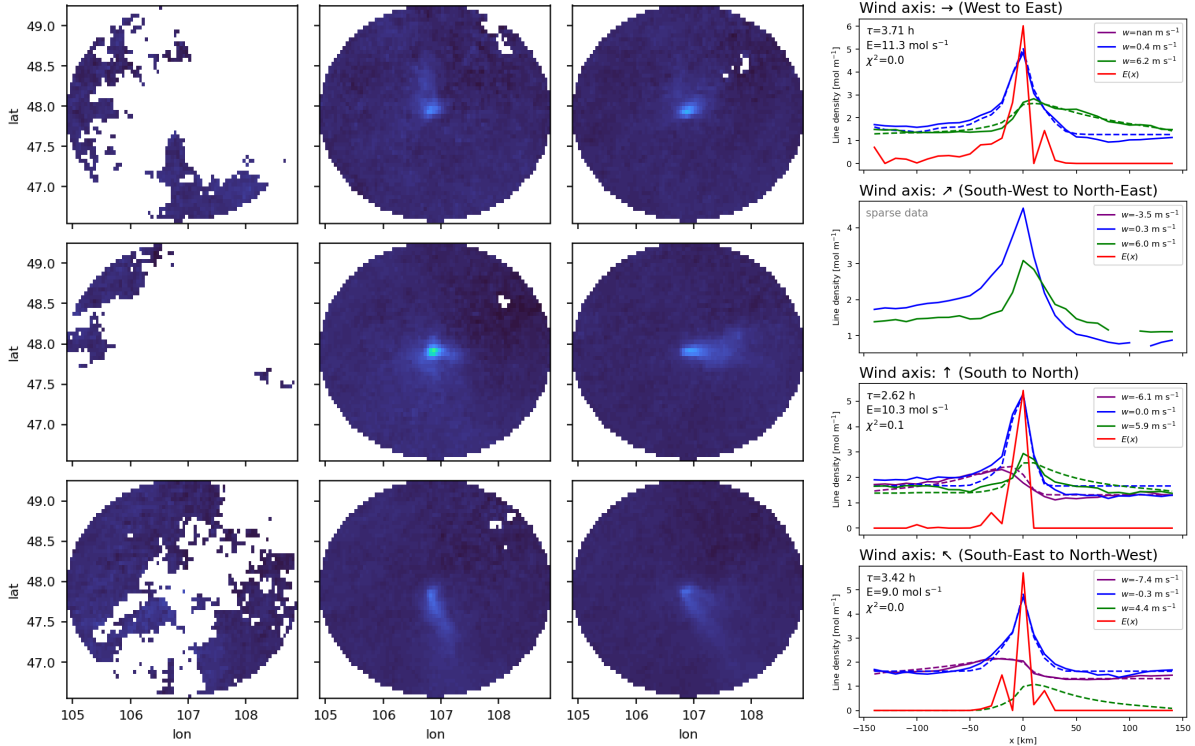

## 75.4 Autumn

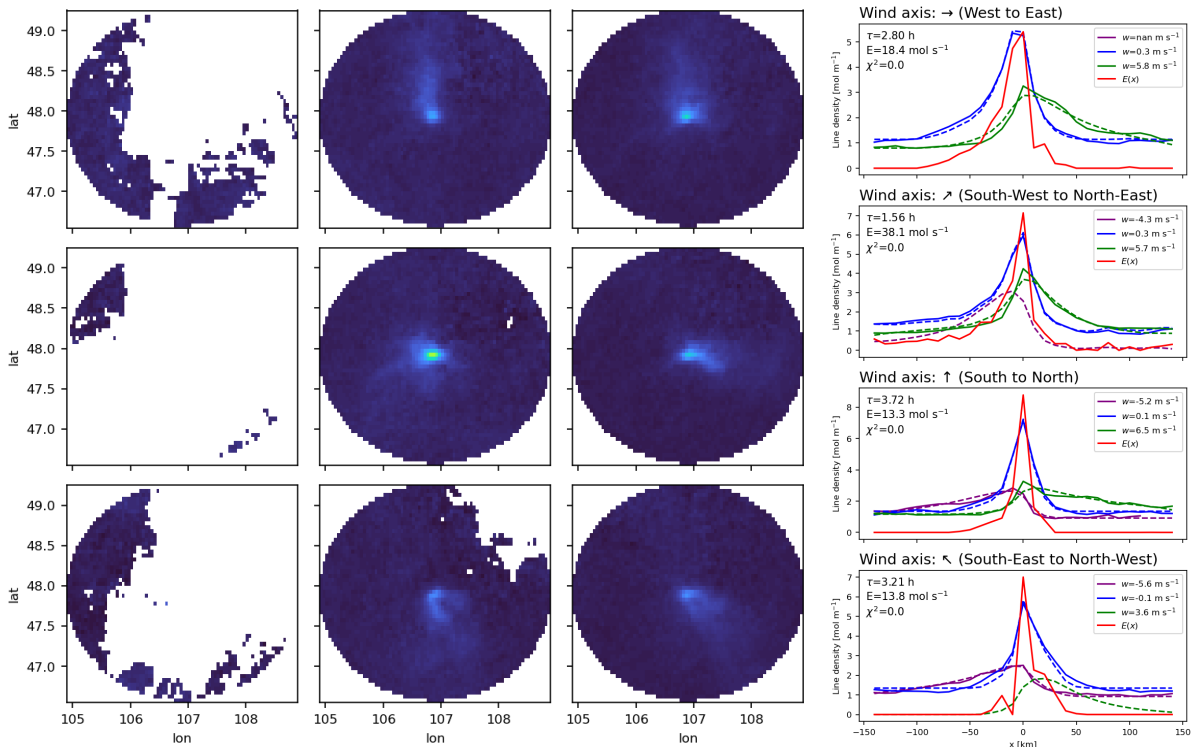



76.1 Winter

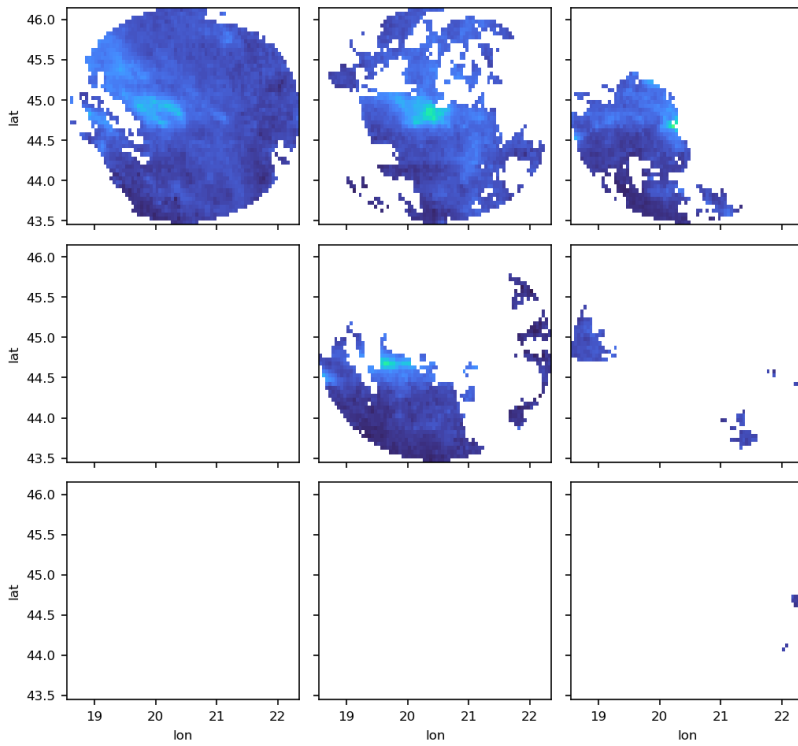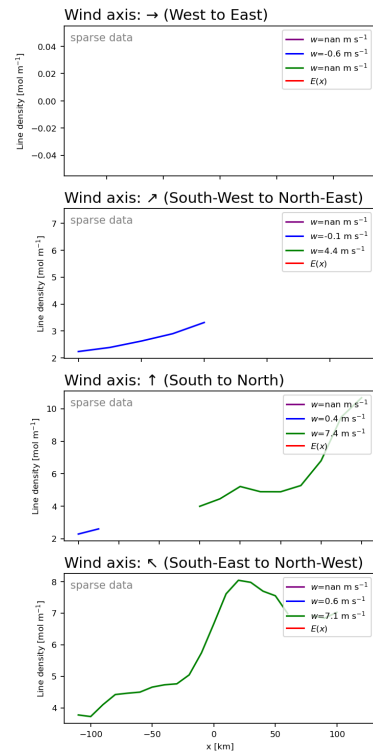

76.2 Spring

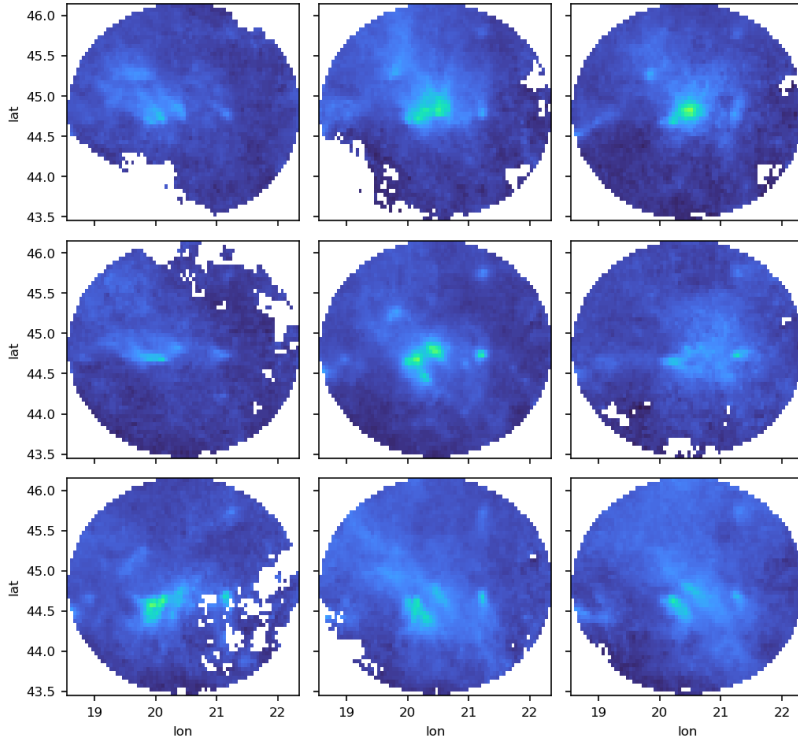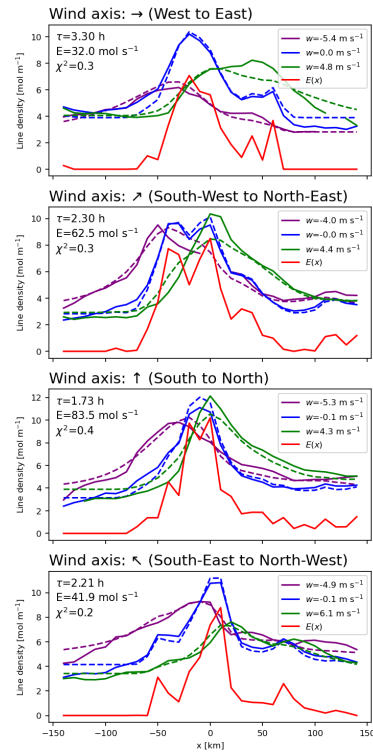

## 76.3 Summer

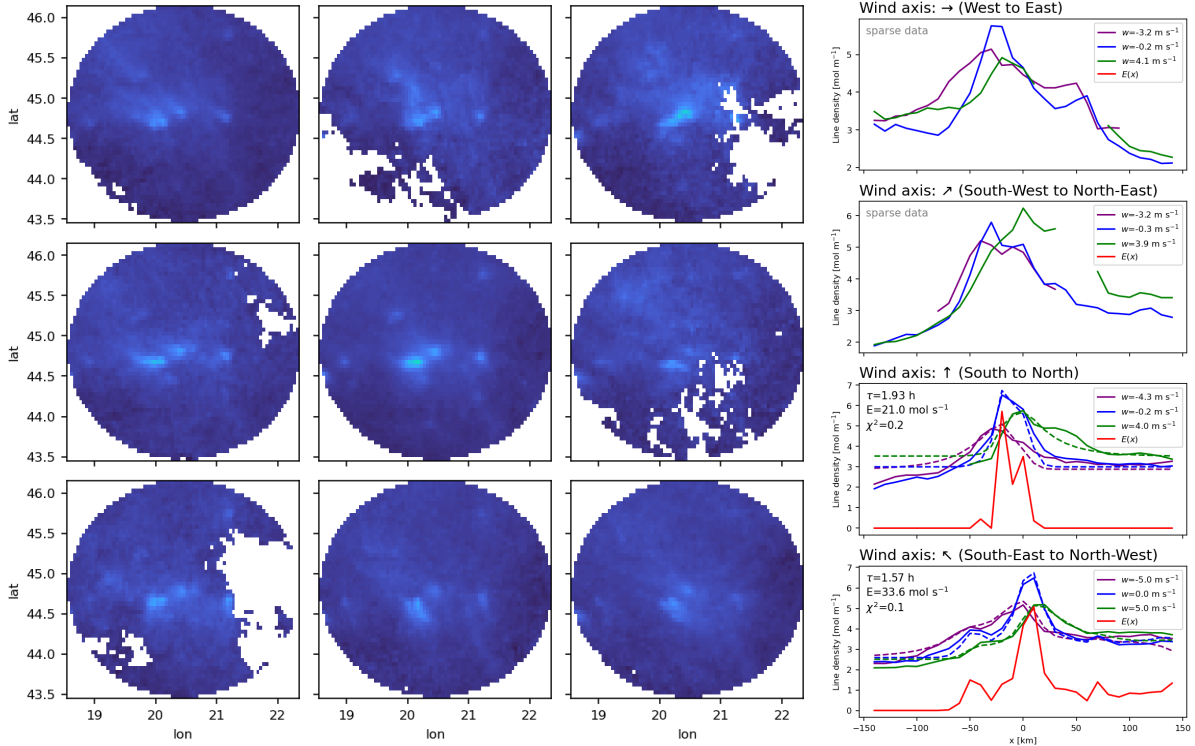

## 76.4 Autumn

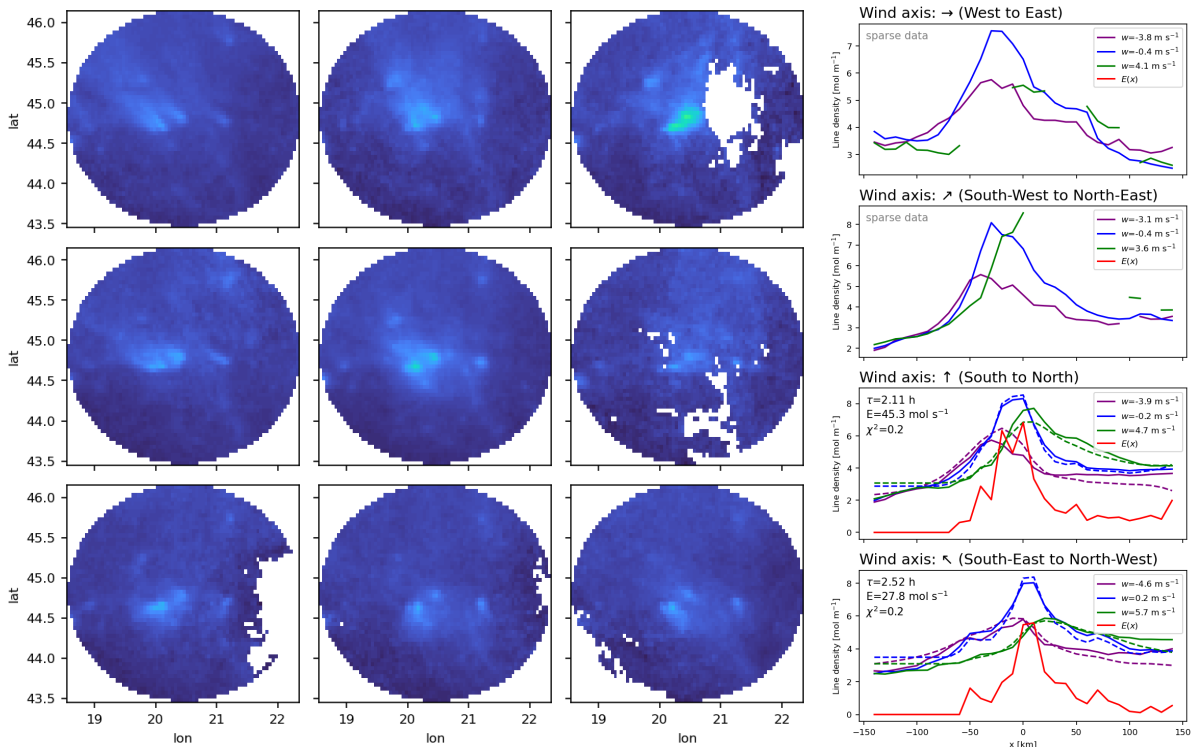

77.1 Winter

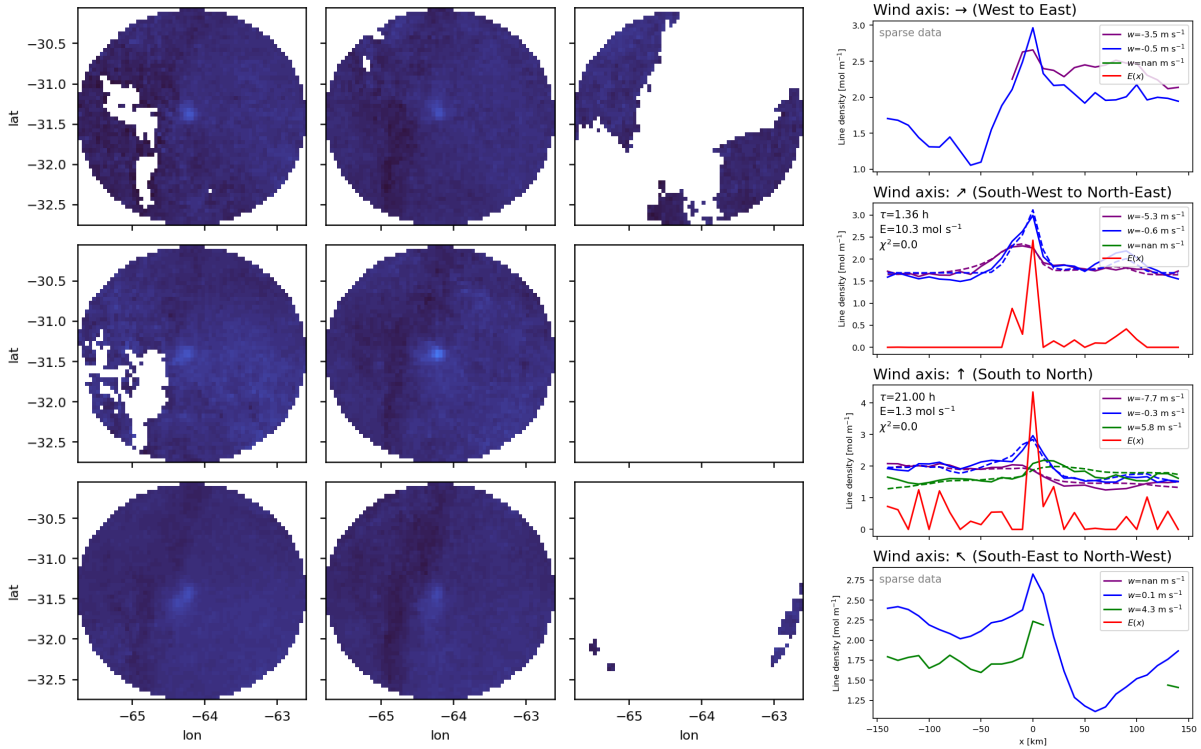

77.2 Spring

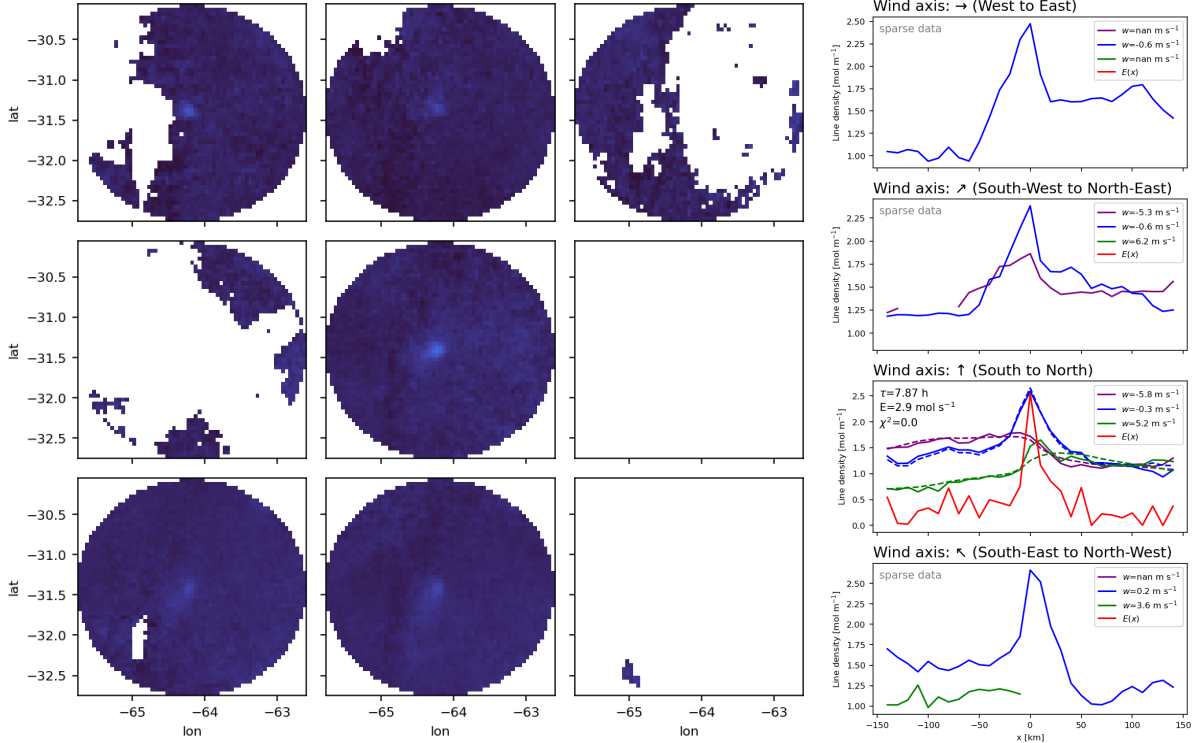

## 77.3 Summer

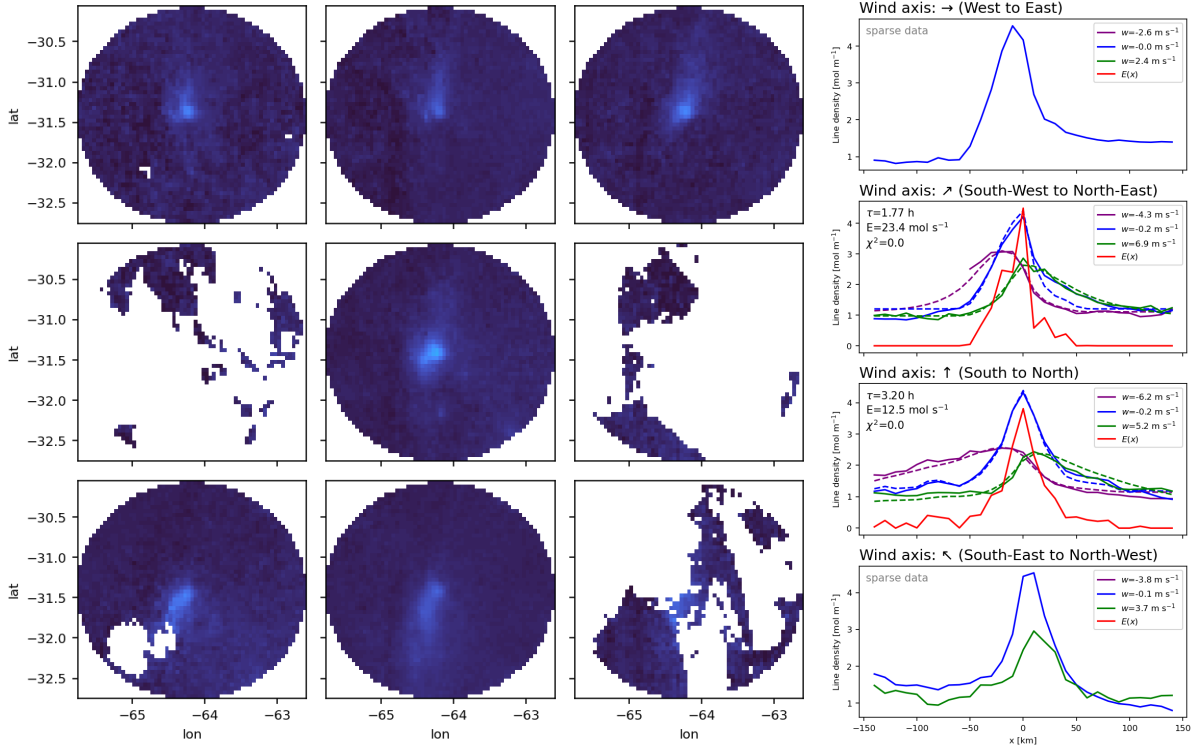

## 77.4 Autumn

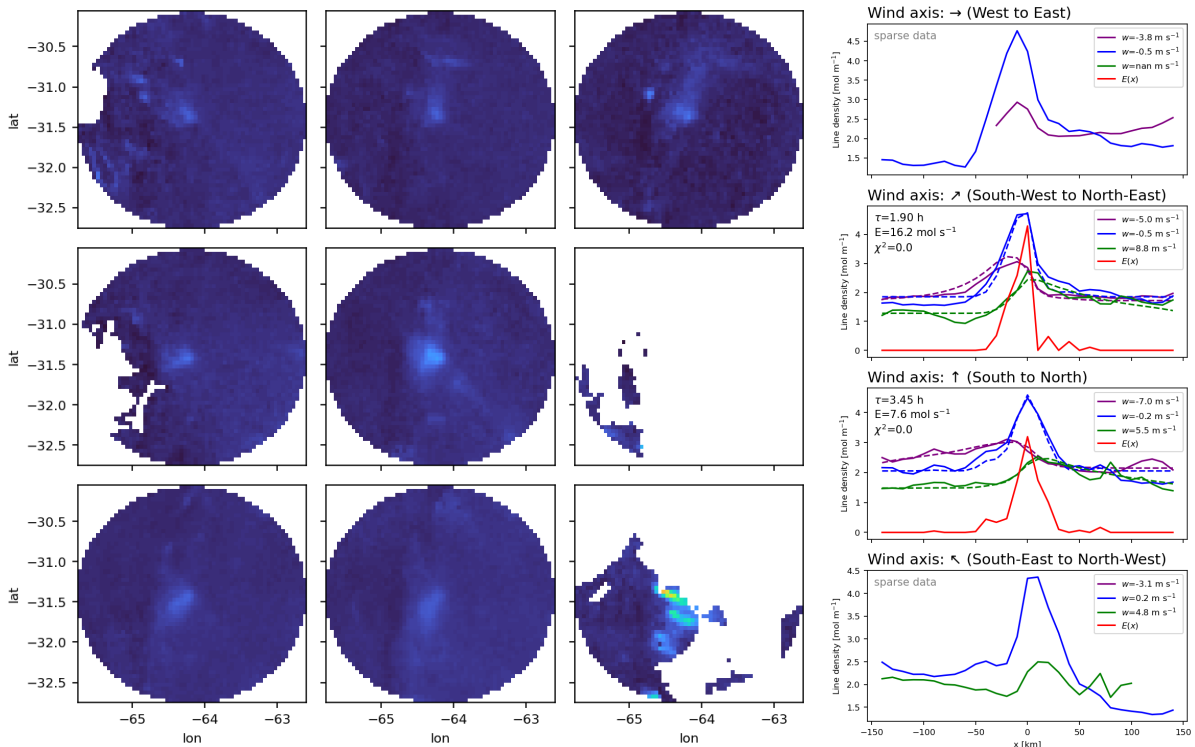

78.1 Winter

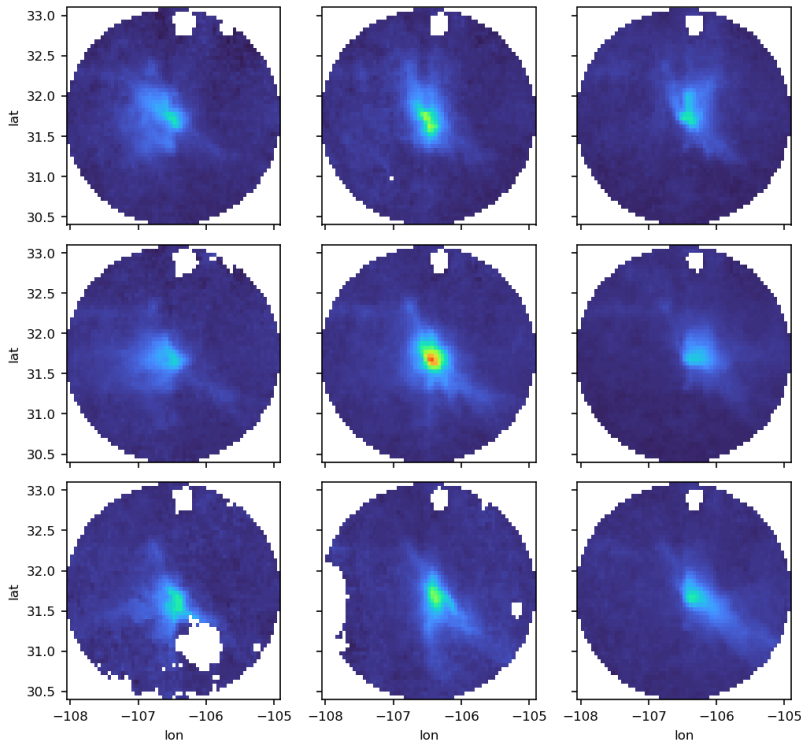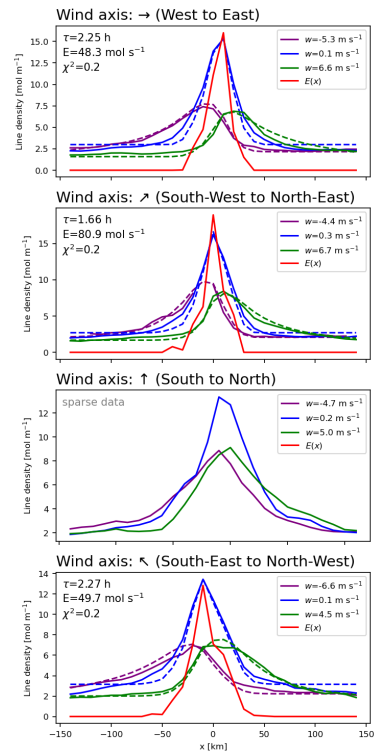

78.2 Spring

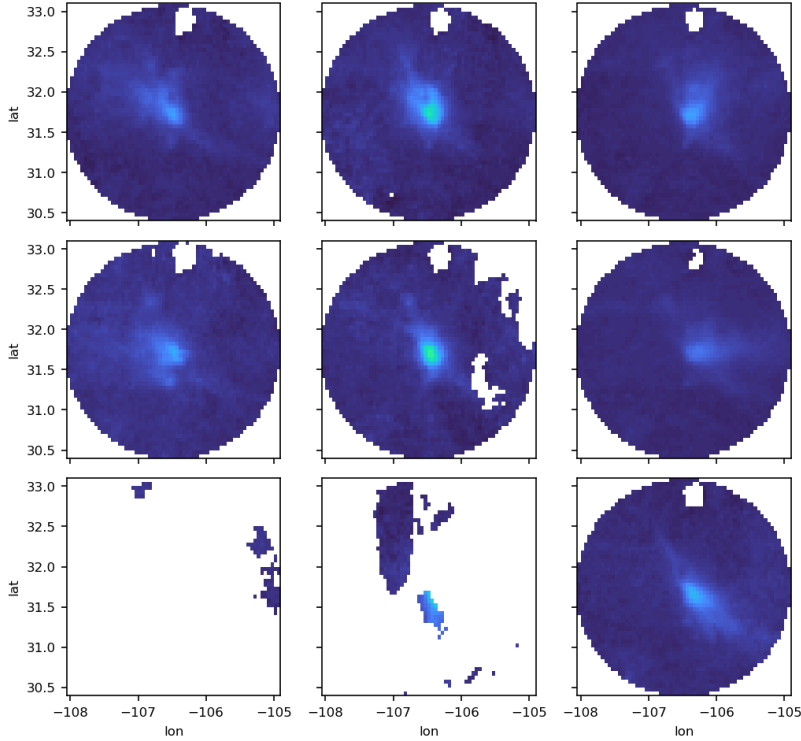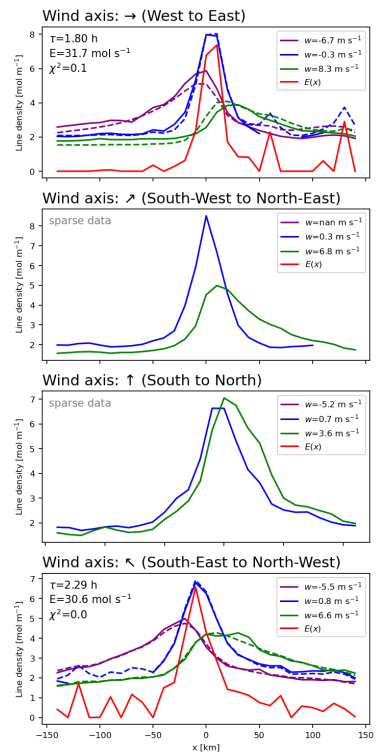

### 78.3 Summer

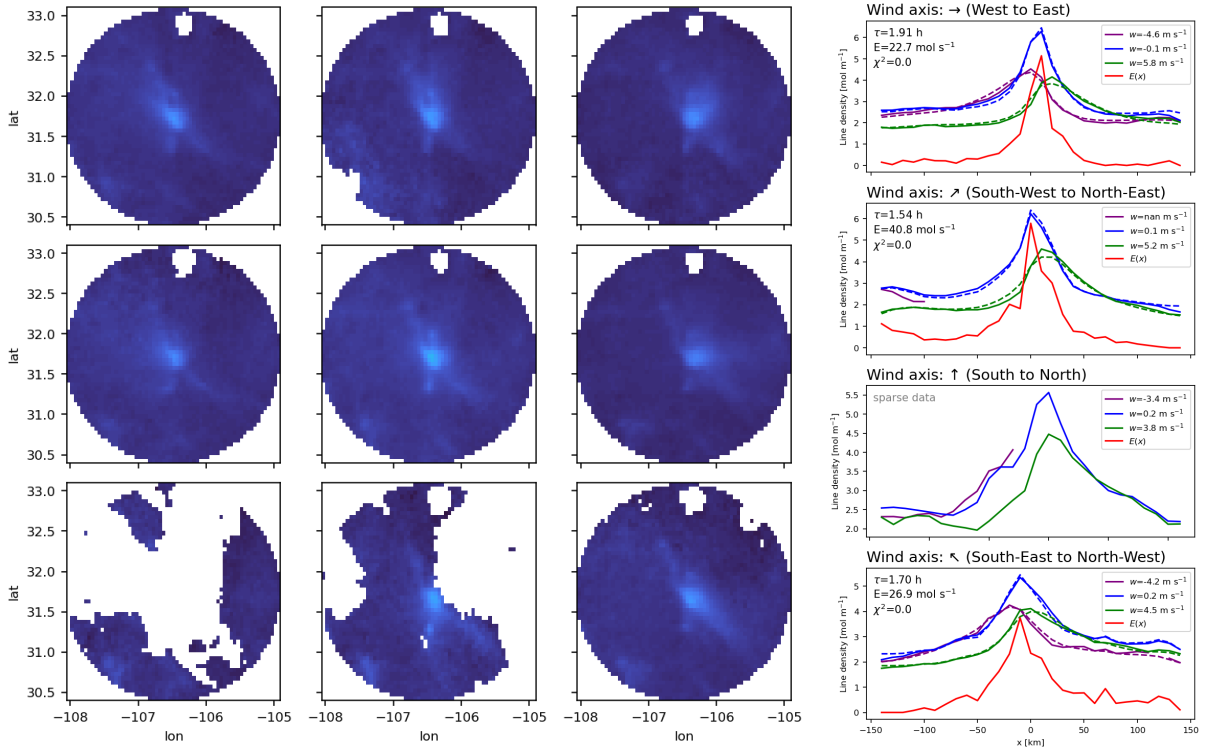

### 78.4 Autumn

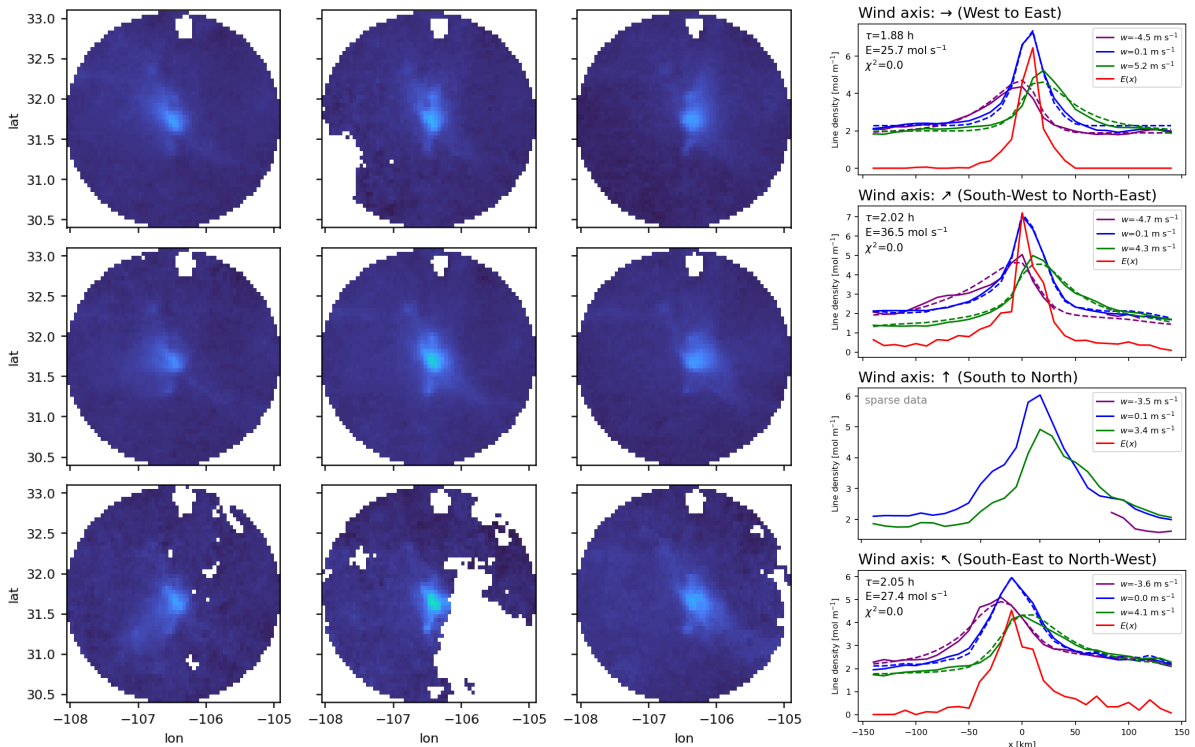

79.1 Winter

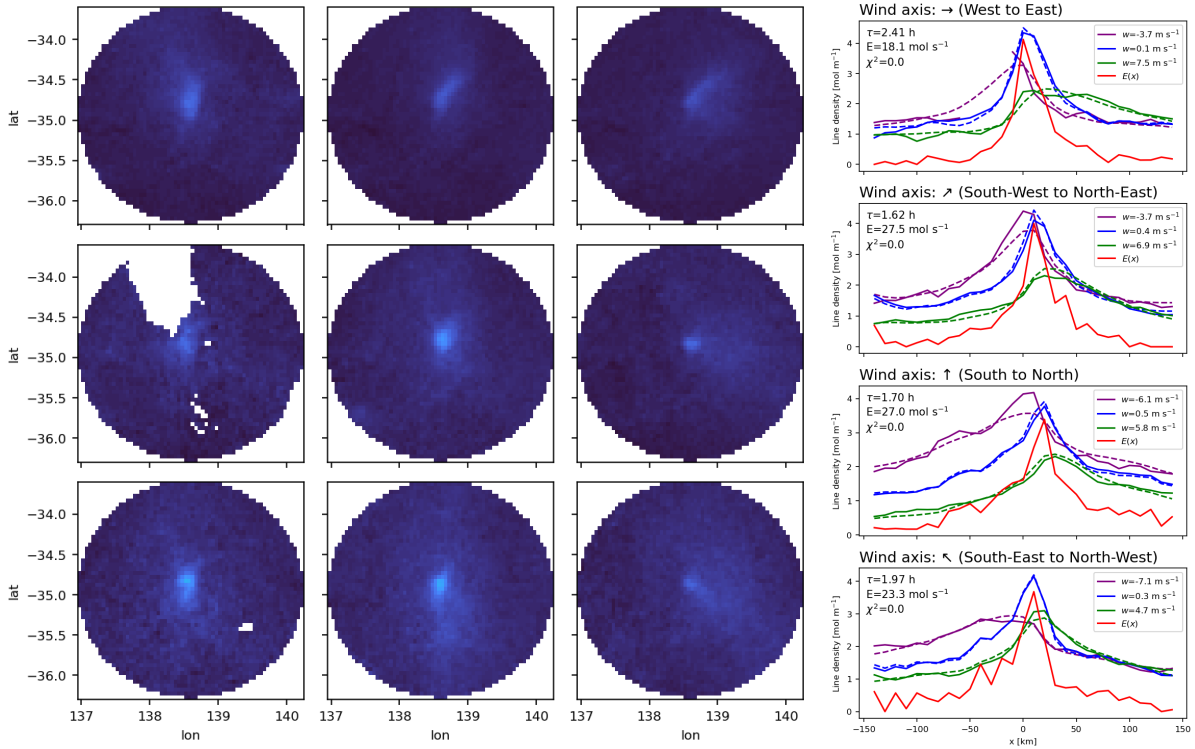

79.2 Spring

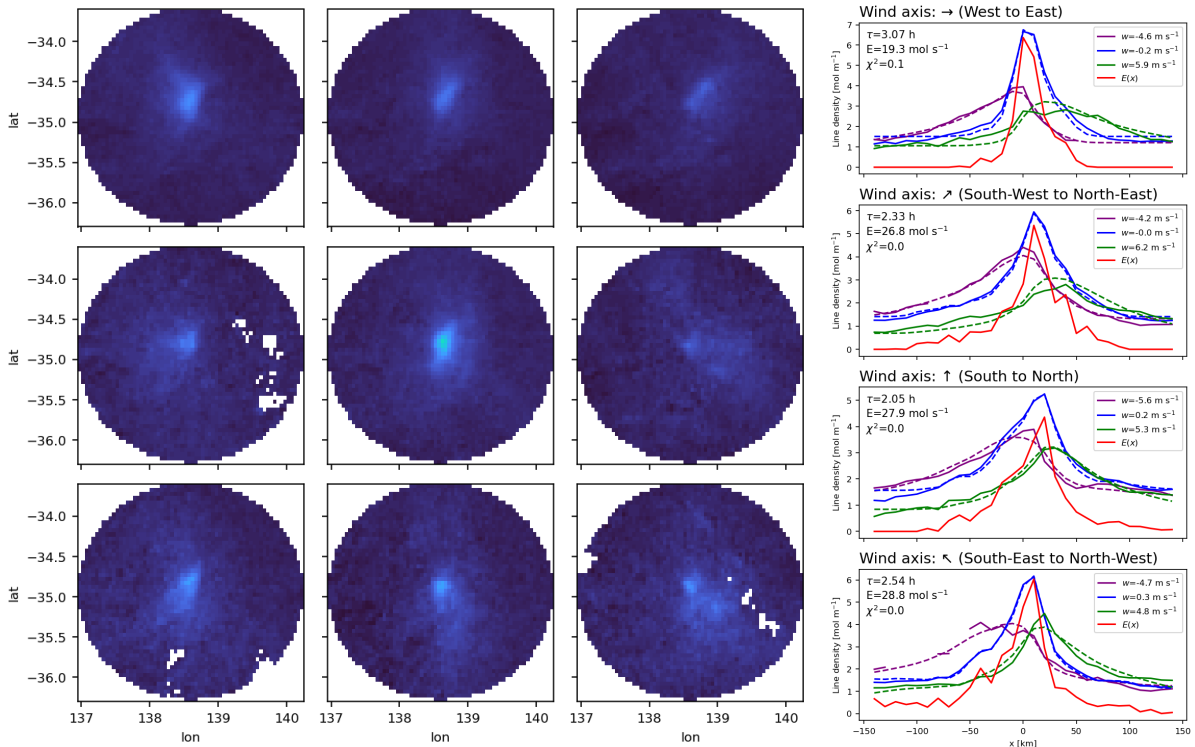

## 79.3 Summer

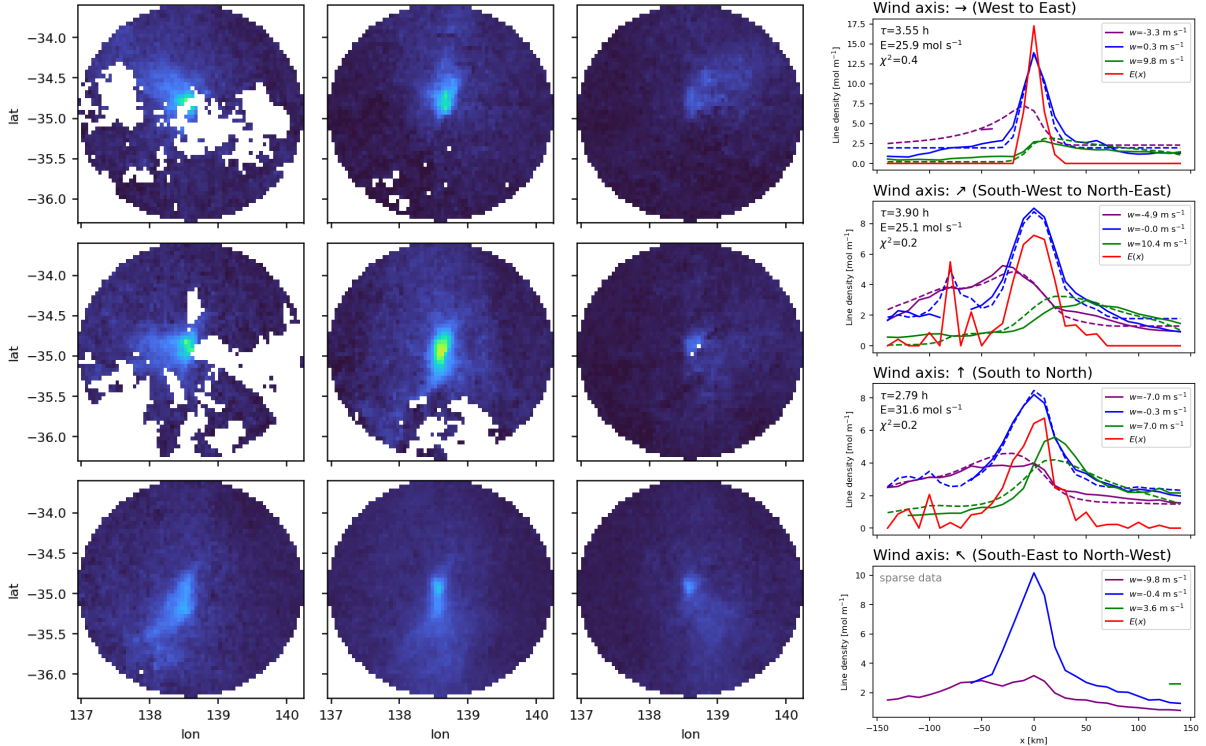

## 79.4 Autumn

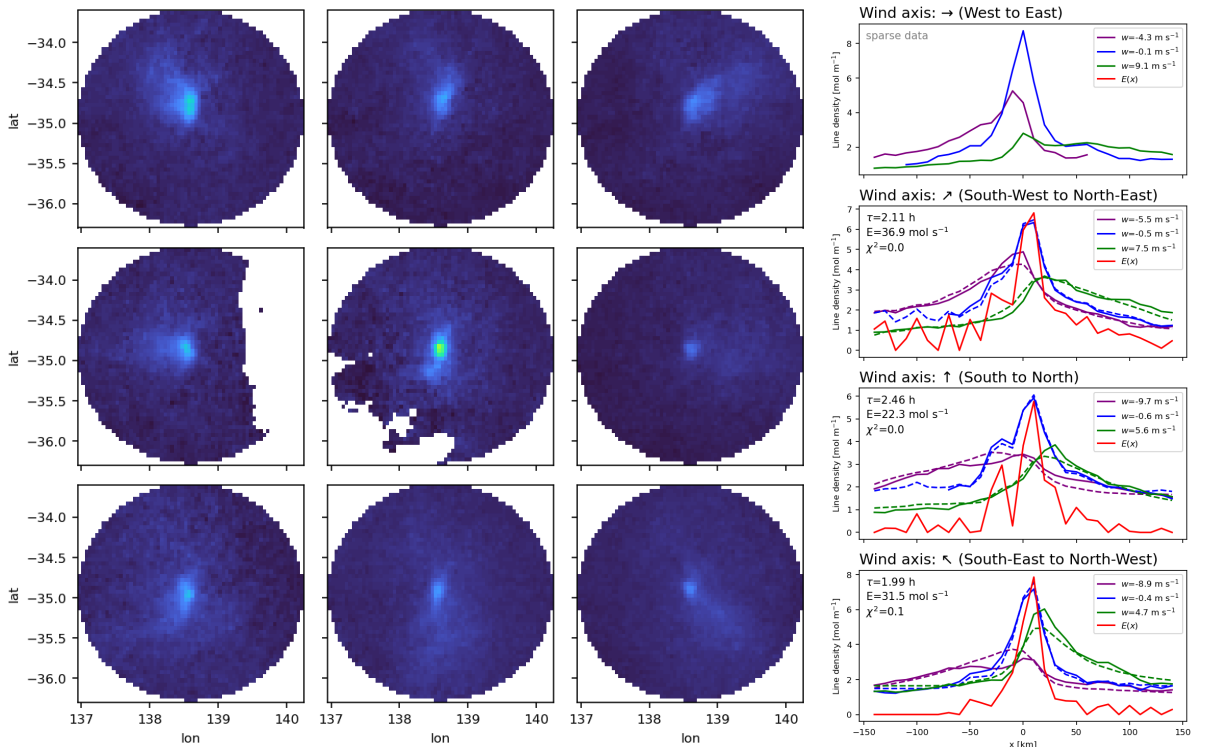



## 80 Nizhniy Novgorod

### 80.1 Winter

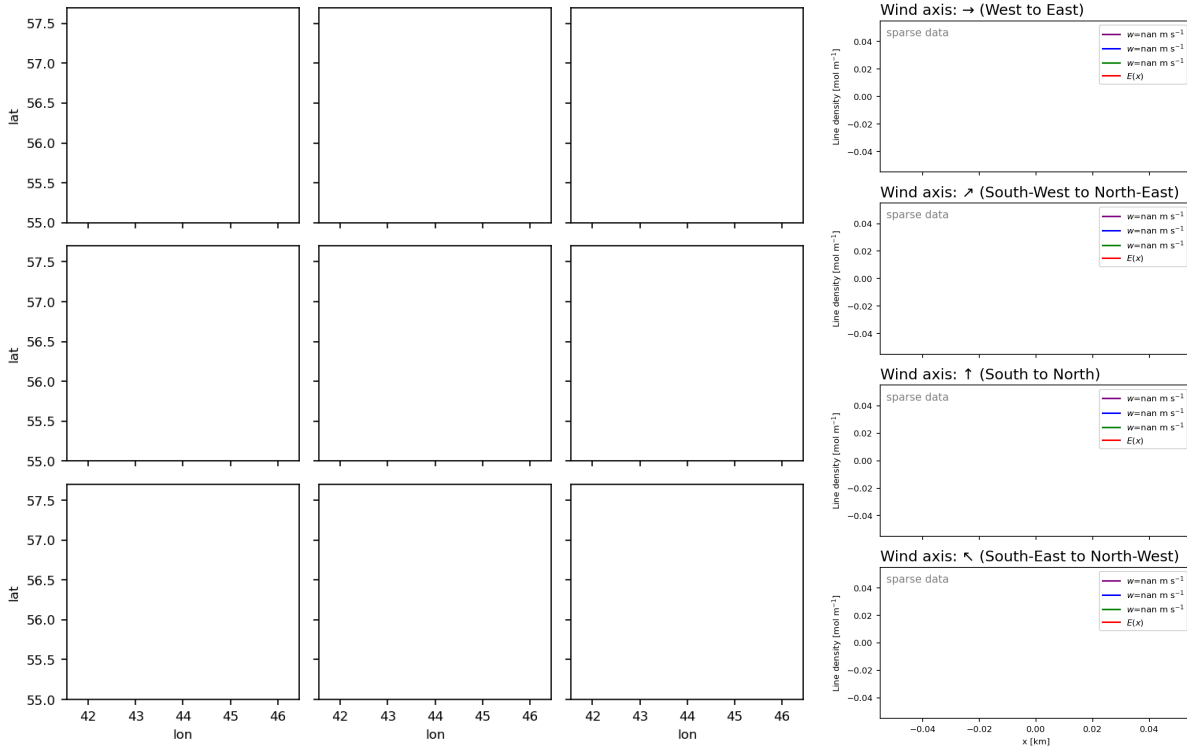

### 80.2 Spring

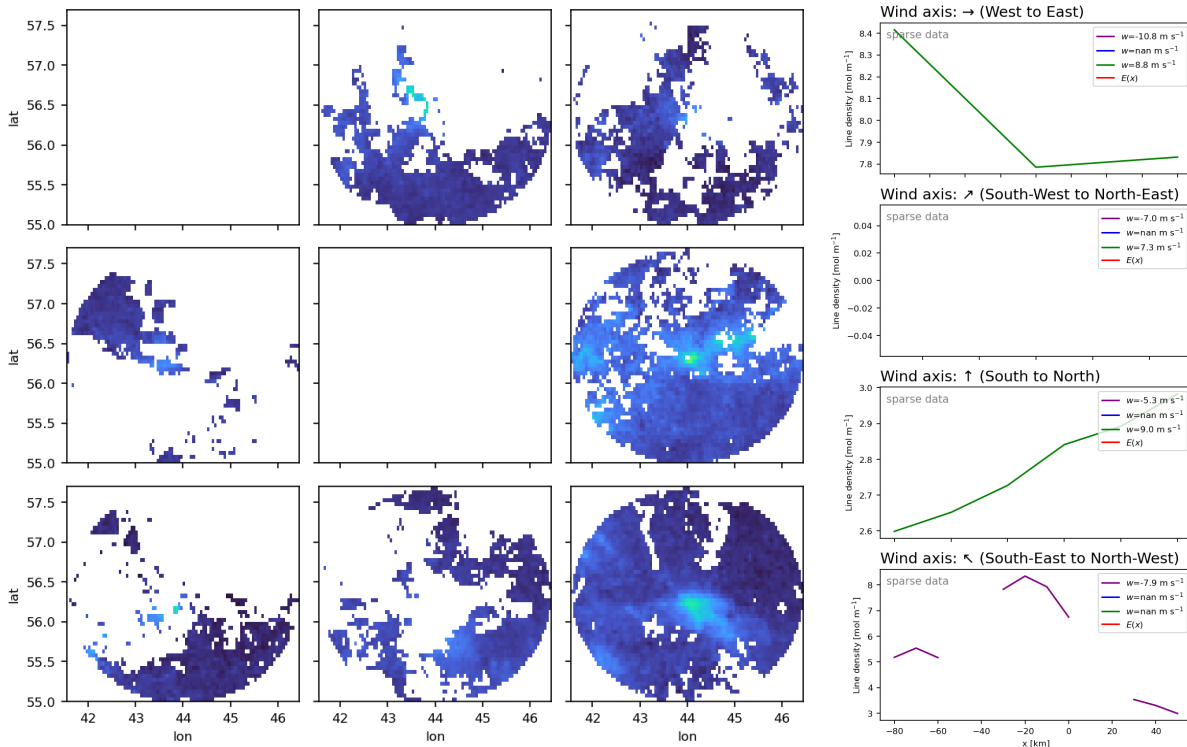

### 80.3 Summer

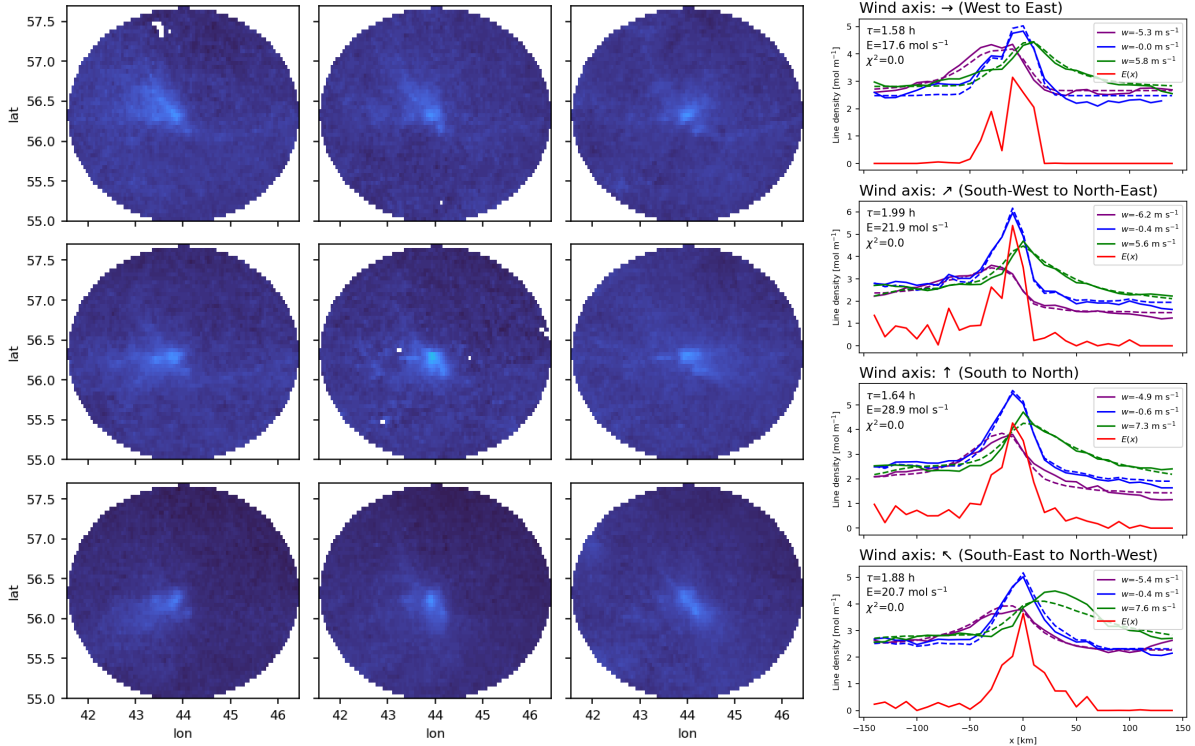

### 80.4 Autumn

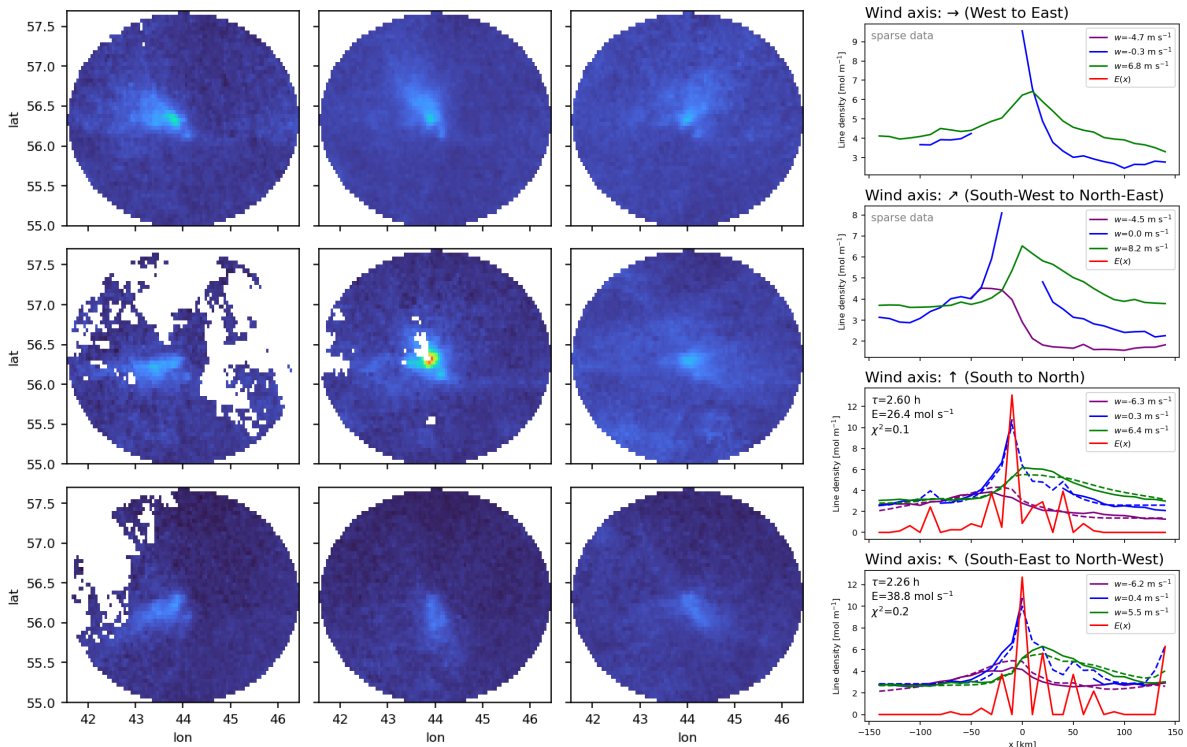

81.1 Winter

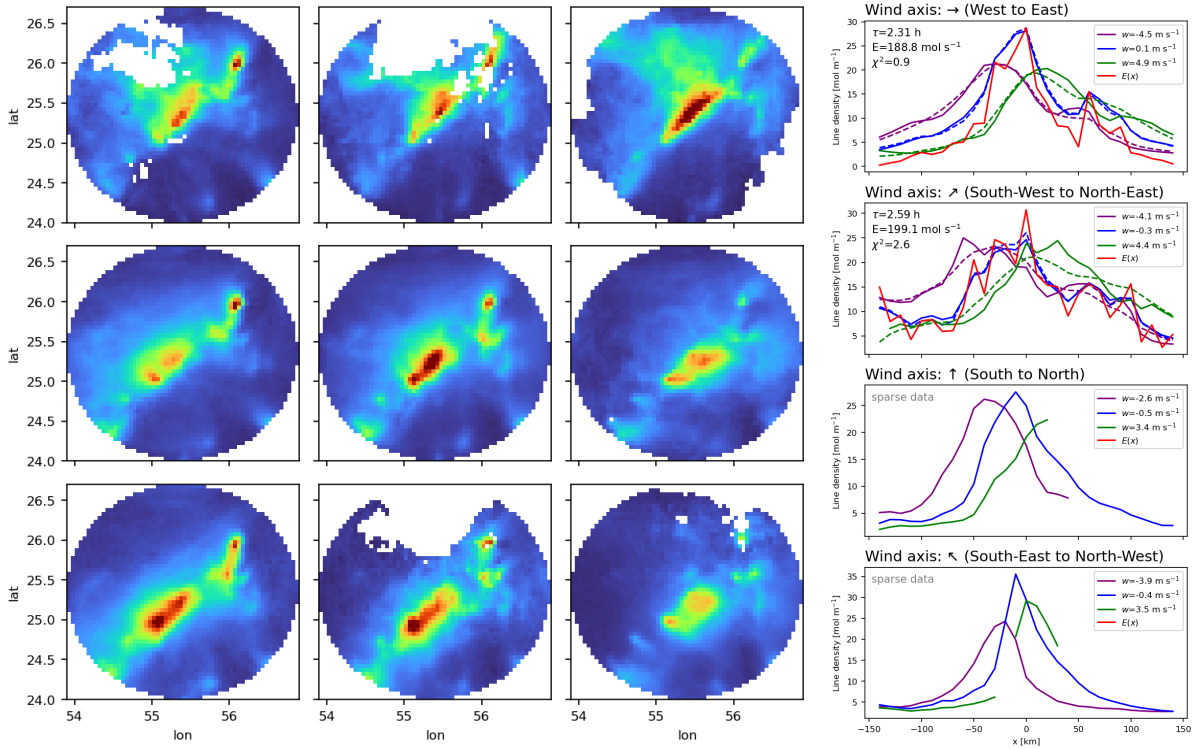

81.2 Spring

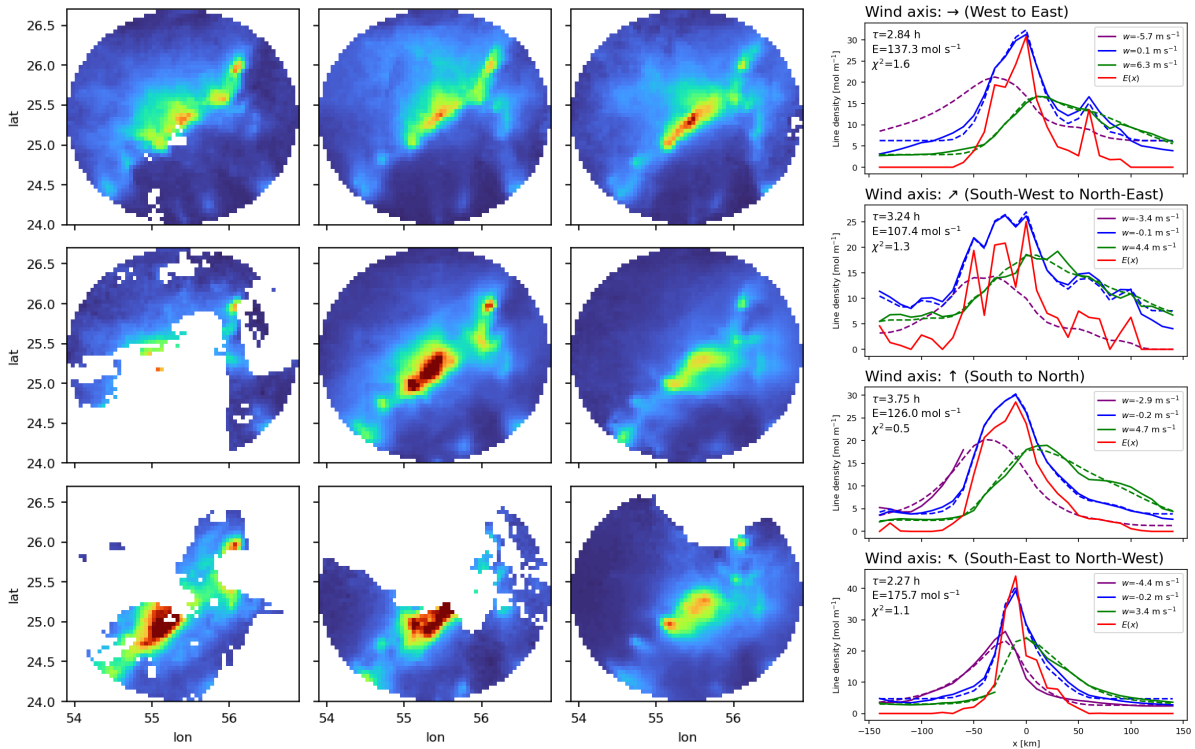

### 81.3 Summer

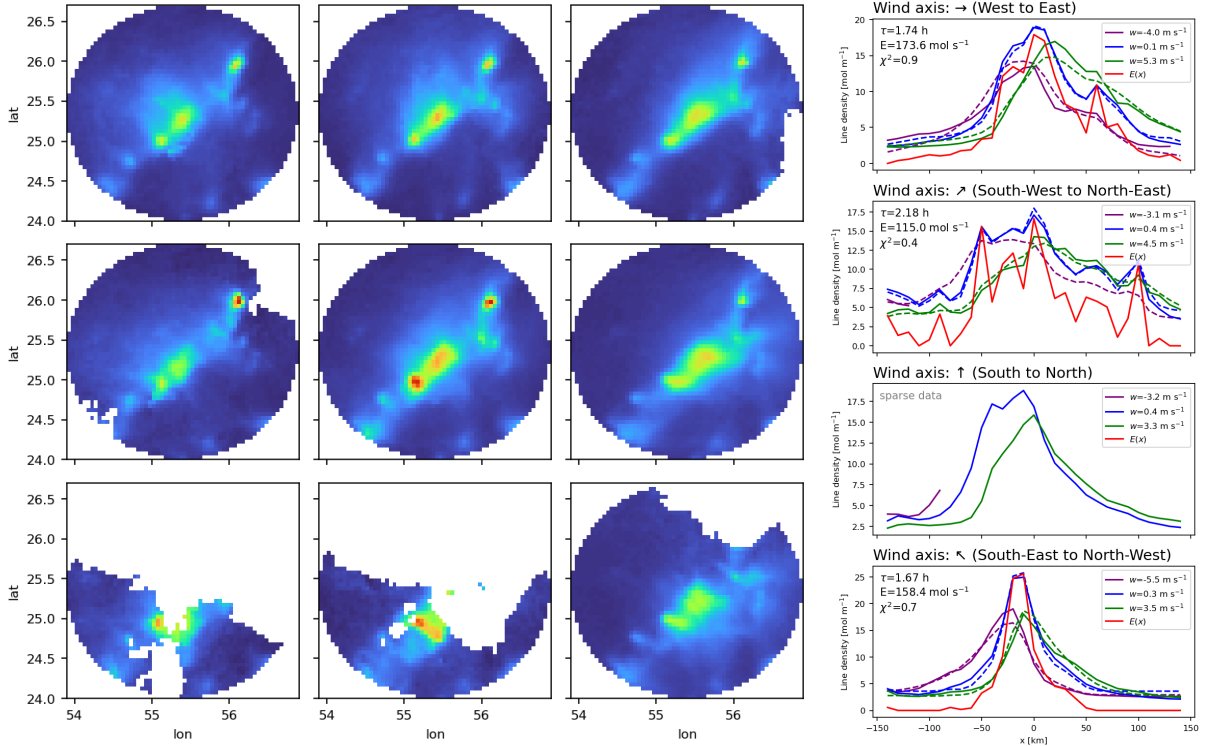

### 81.4 Autumn

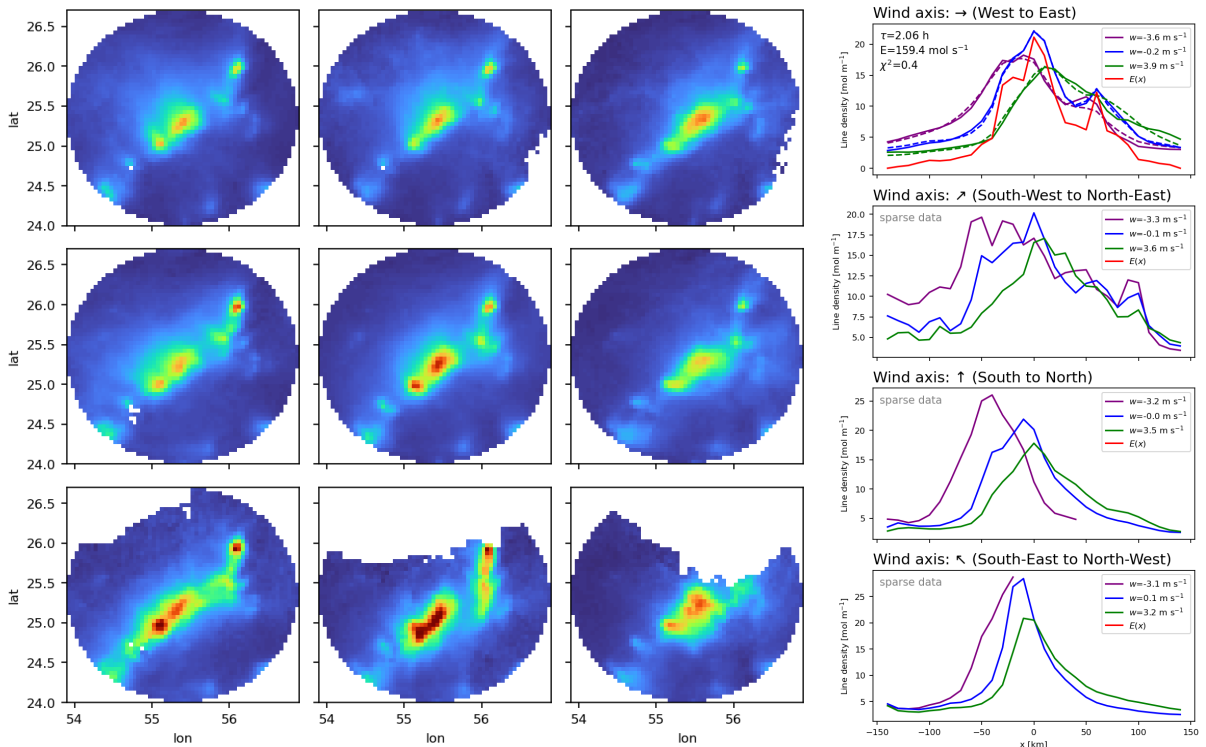

82.1 Winter

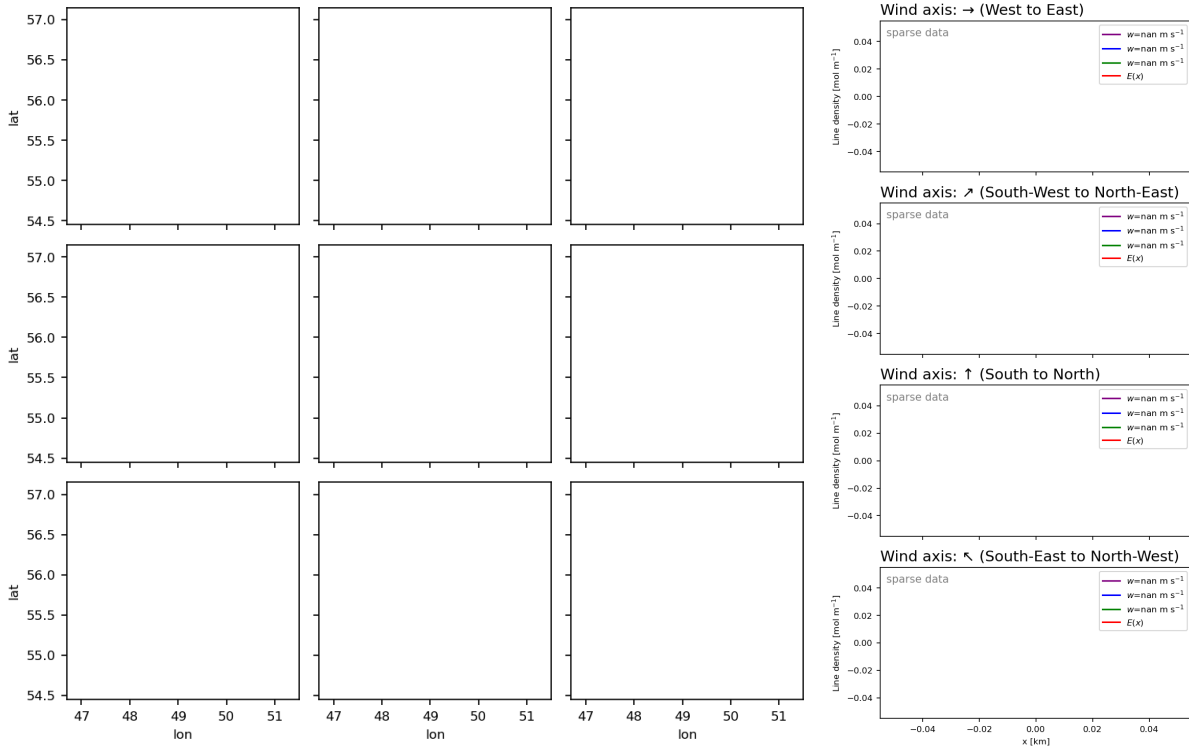

82.2 Spring

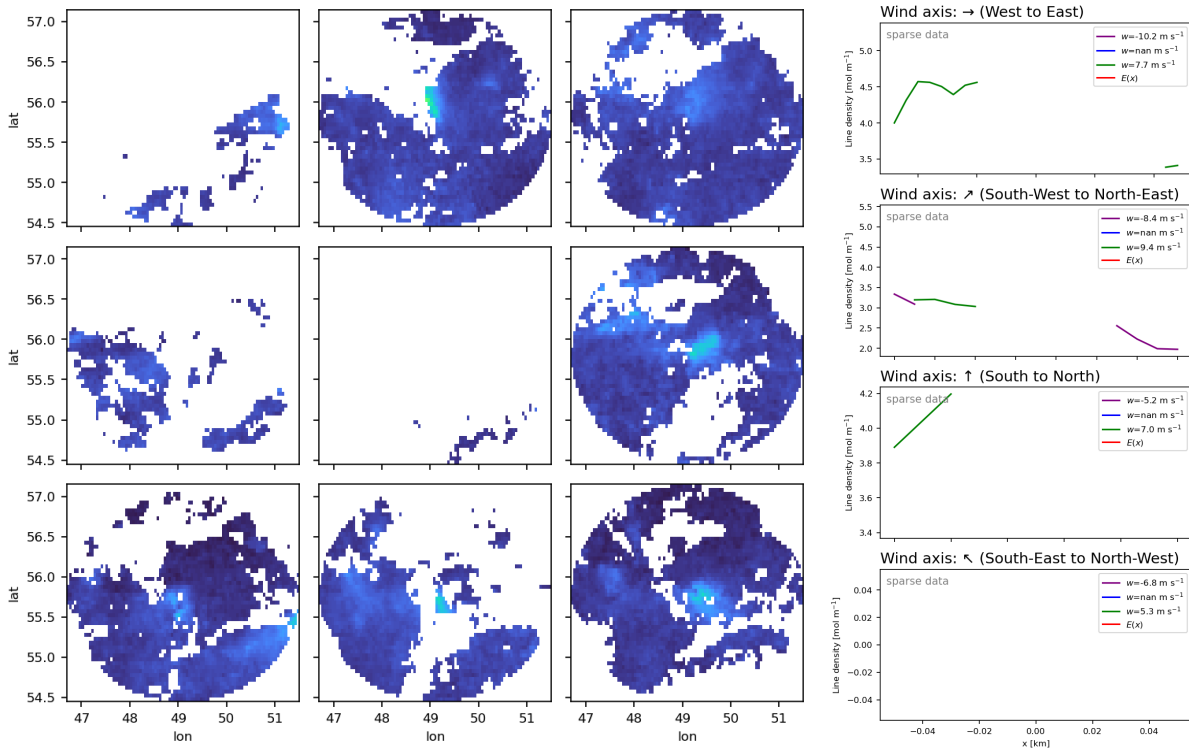

## 82.3 Summer

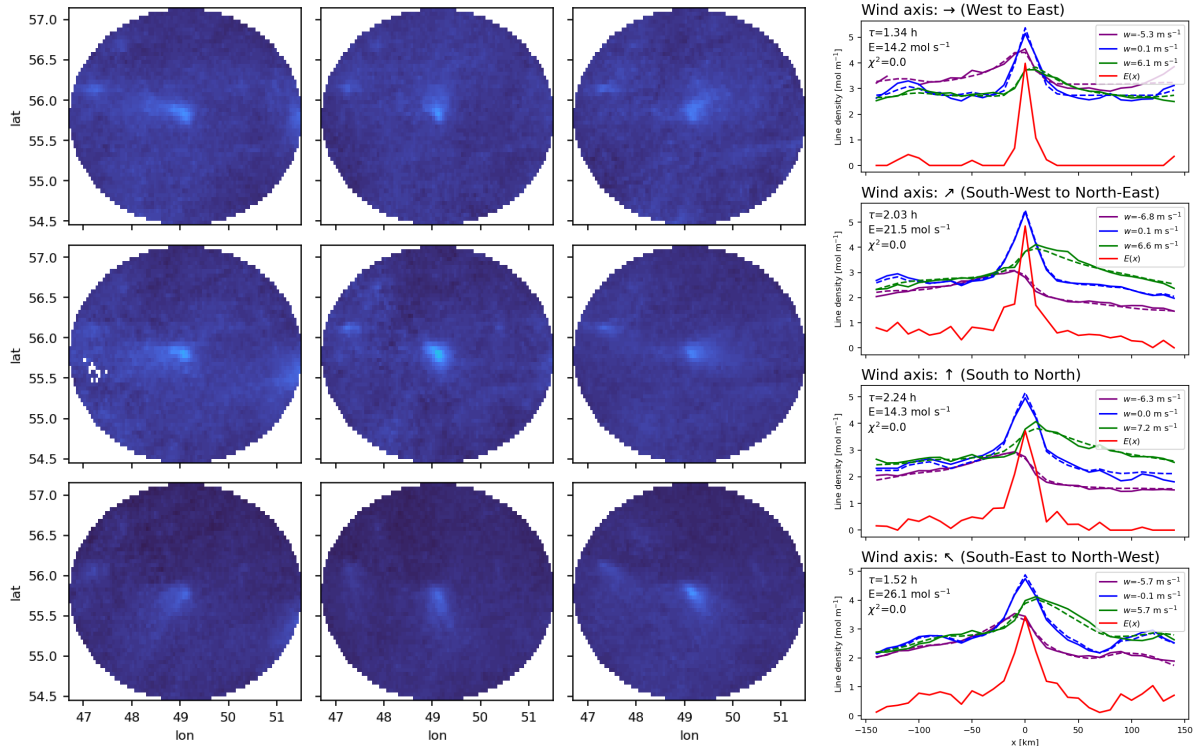

## 82.4 Autumn

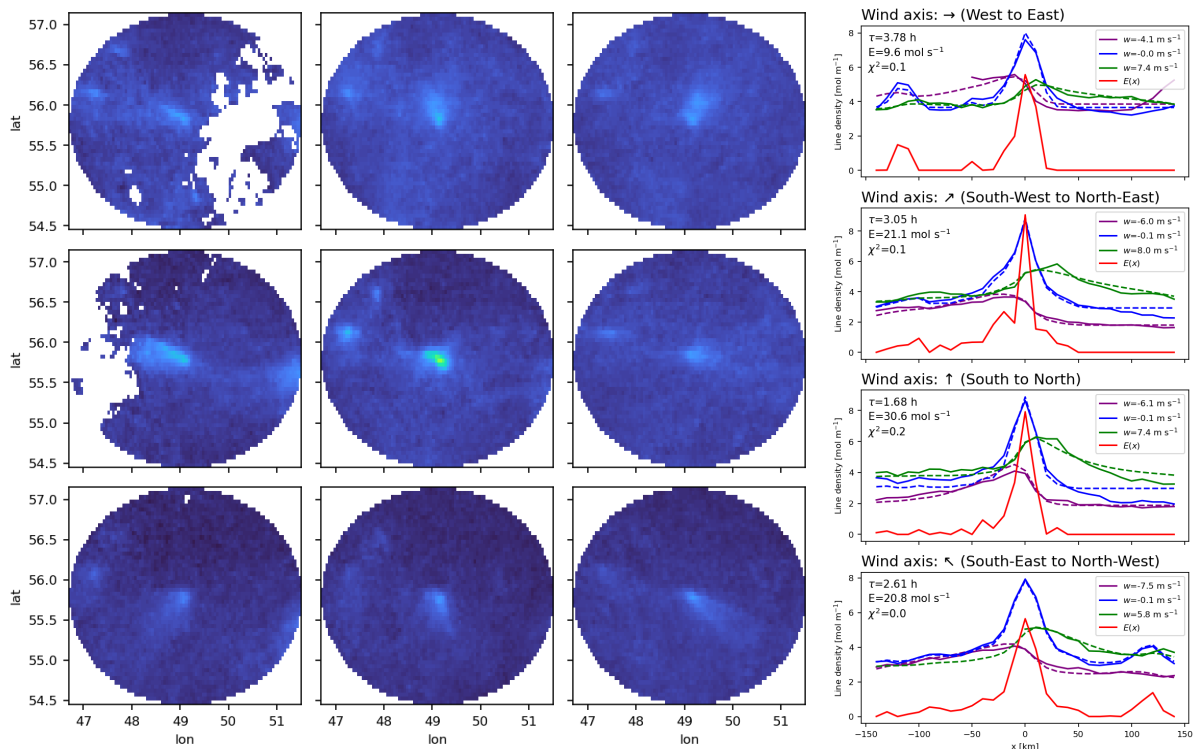

83.1 Winter

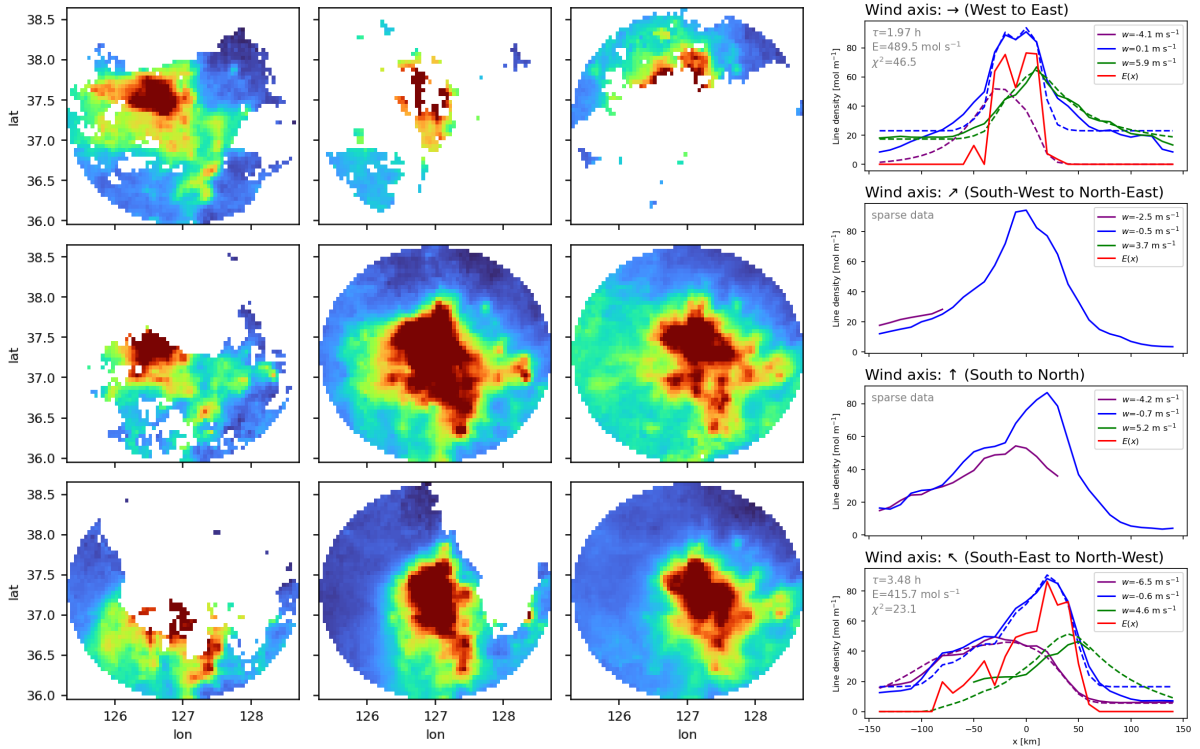

83.2 Spring

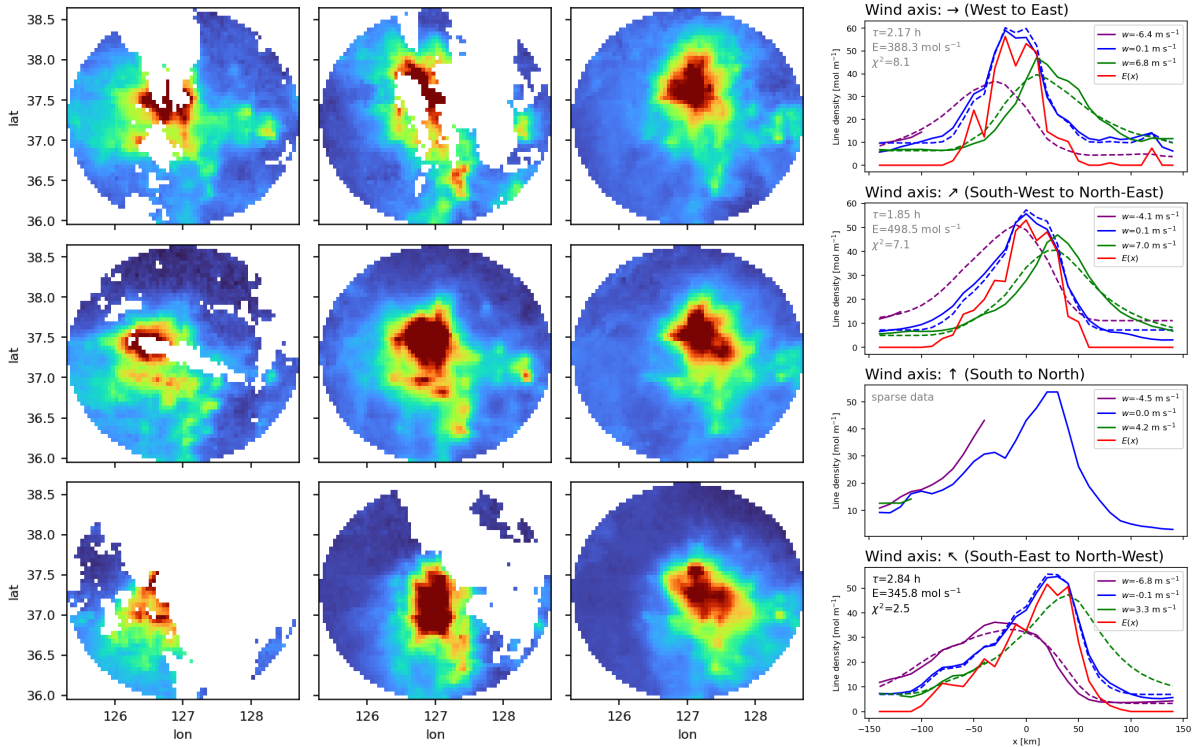

### 83.3 Summer

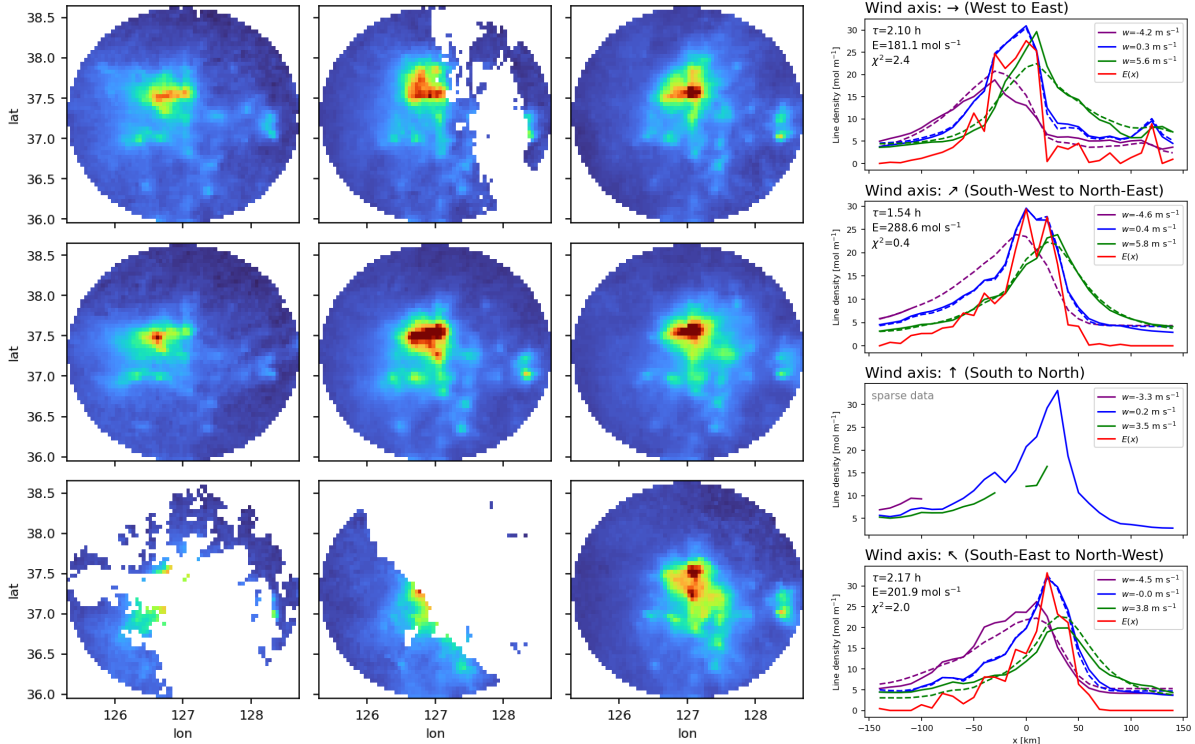

### 83.4 Autumn

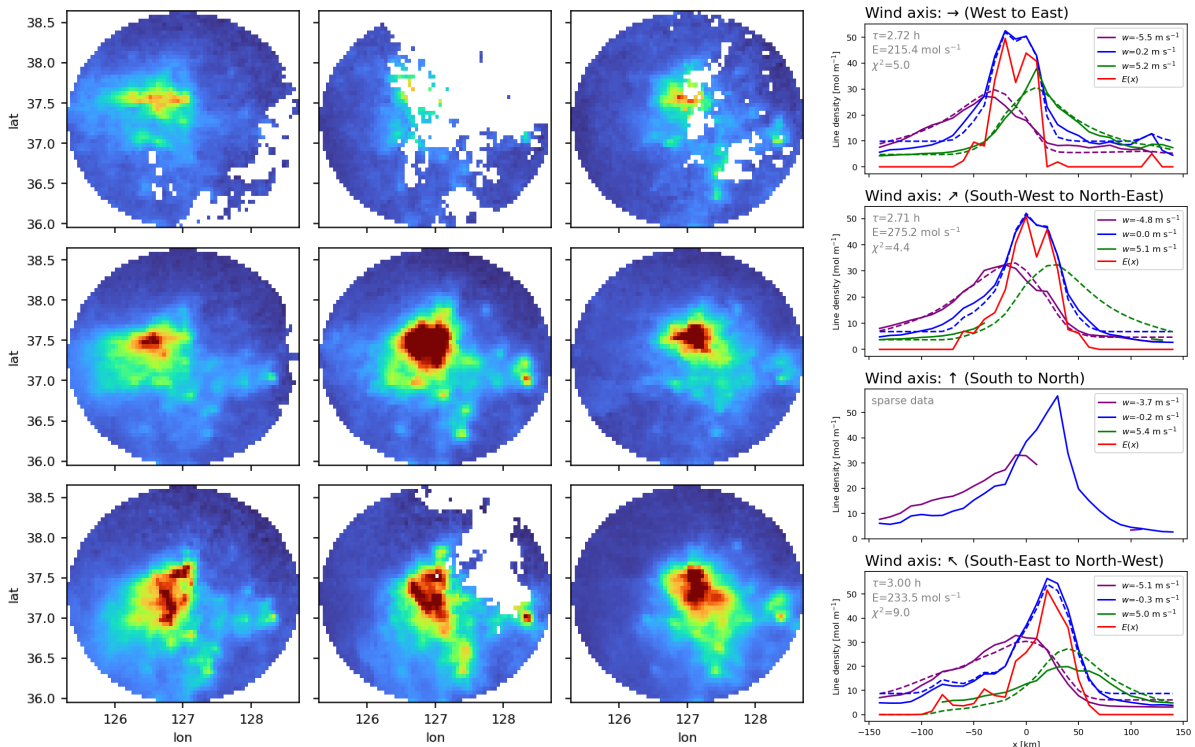



84.1 Winter

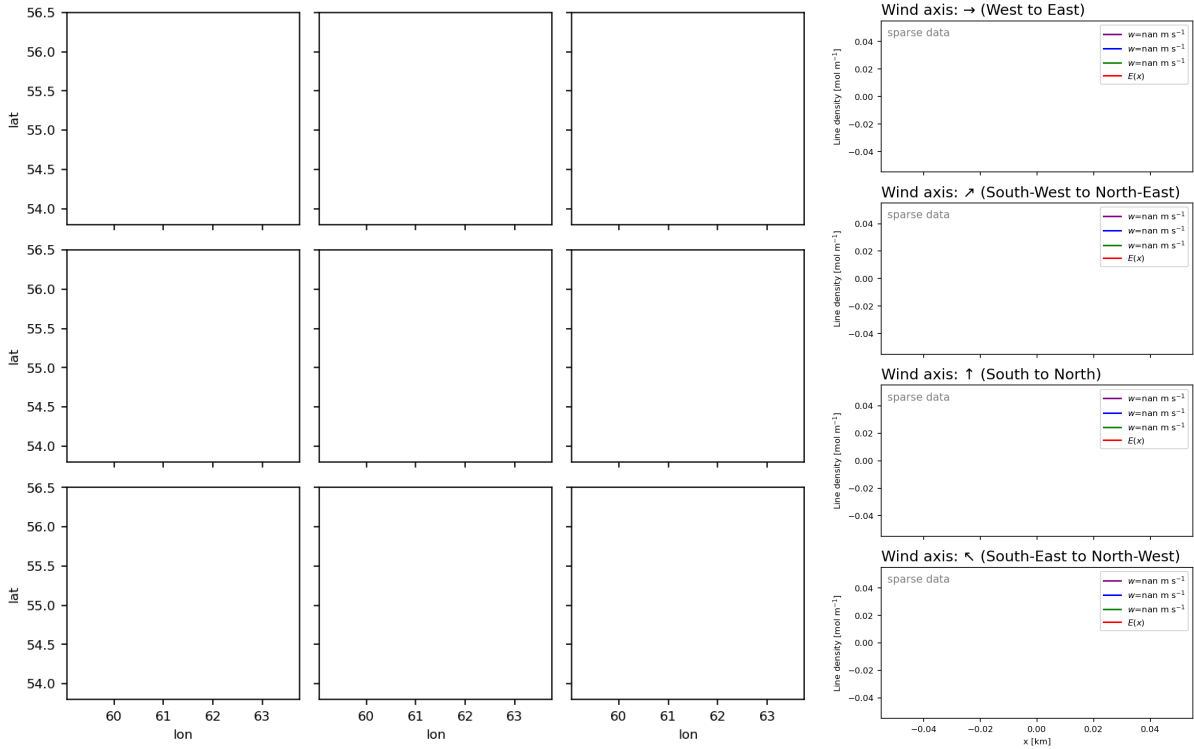

84.2 Spring

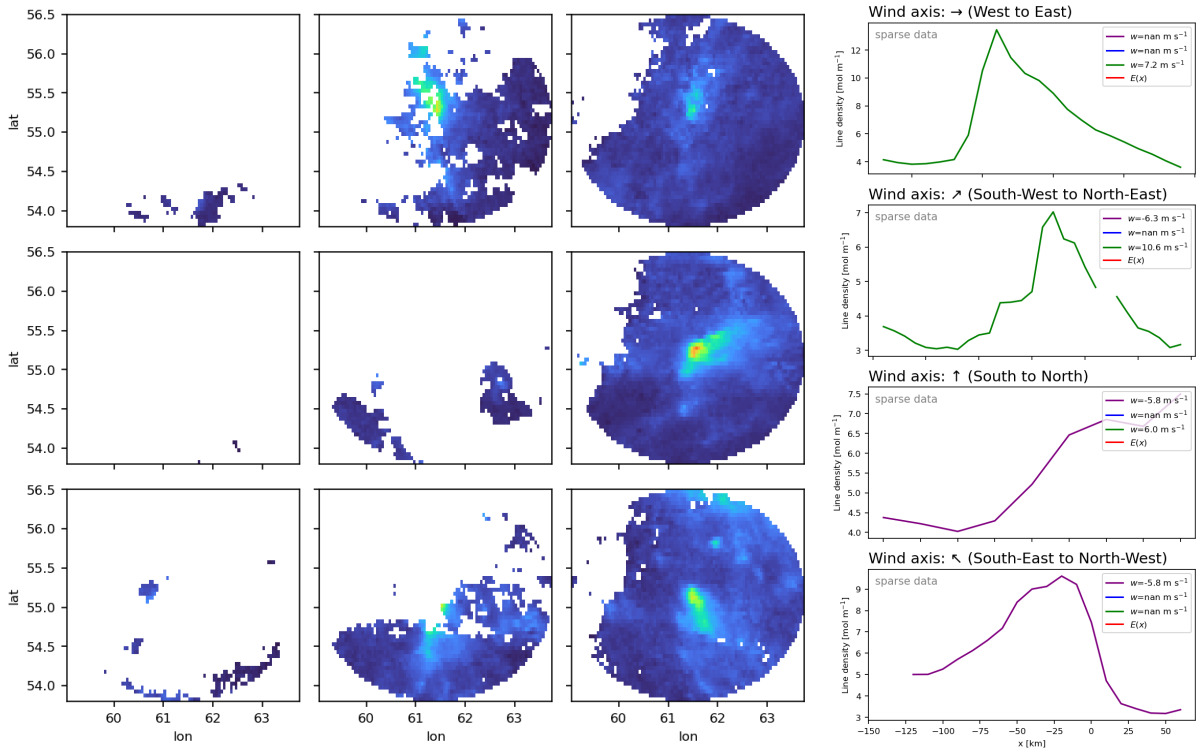

### 84.3 Summer

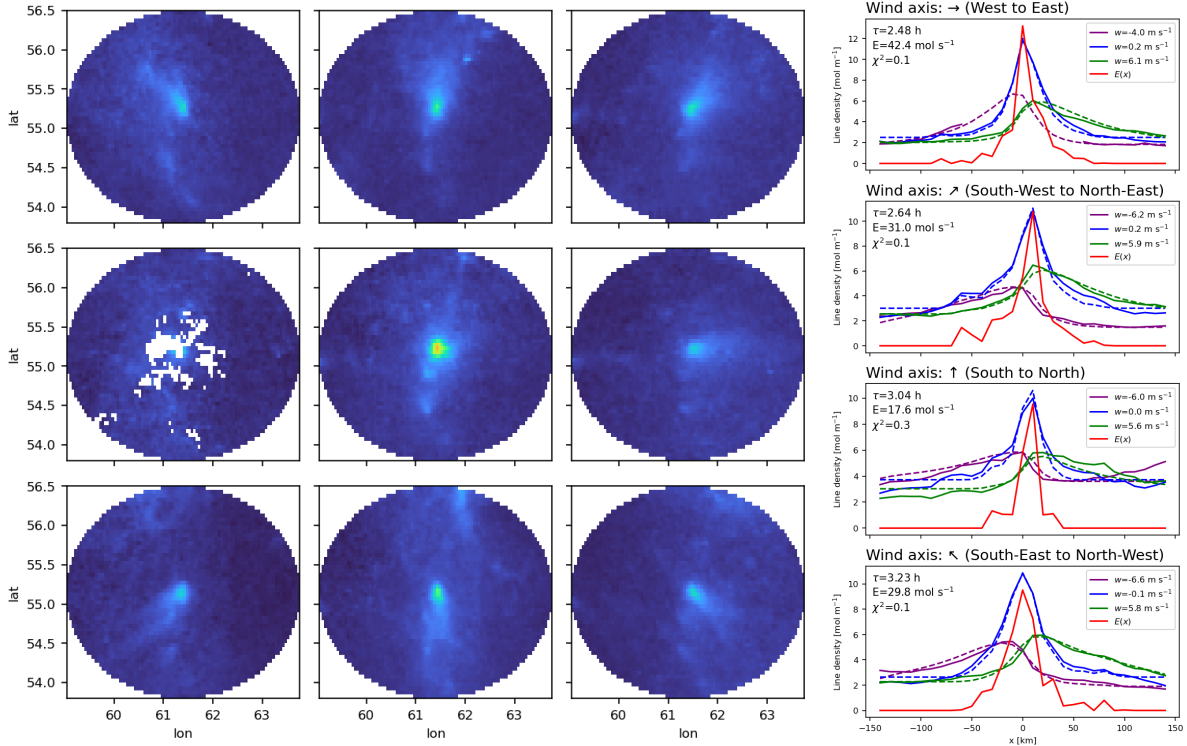

### 84.4 Autumn

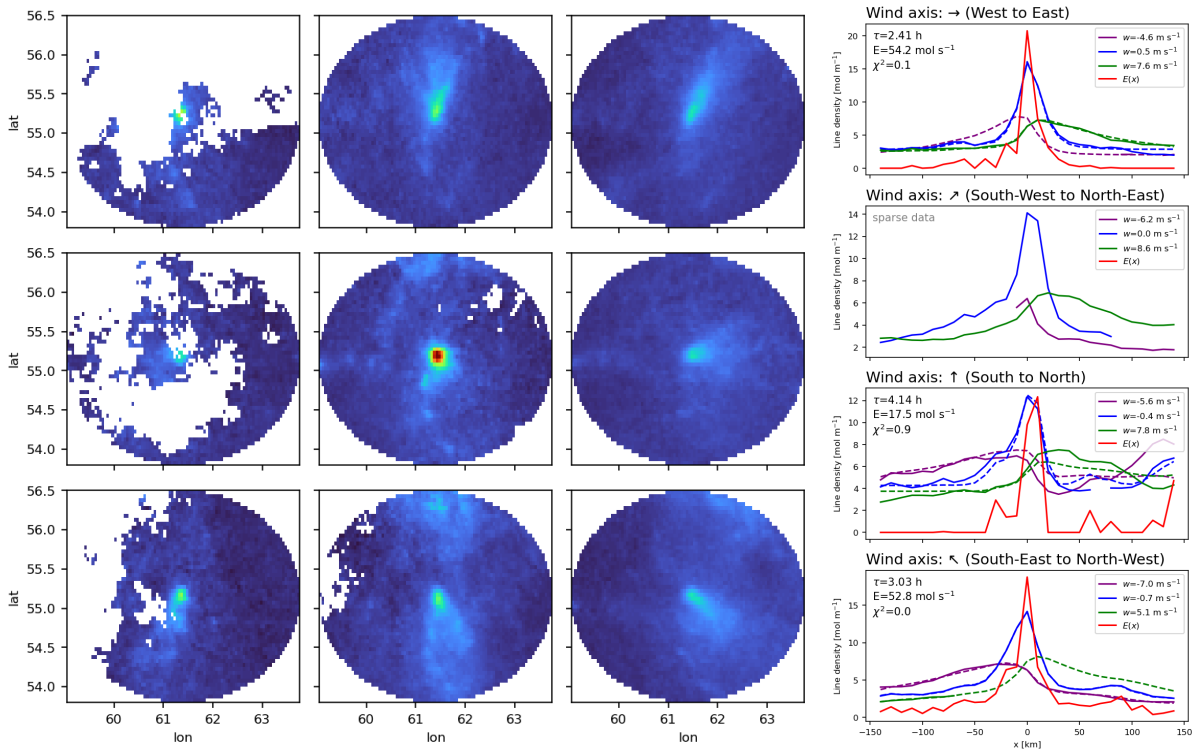

85.1 Winter

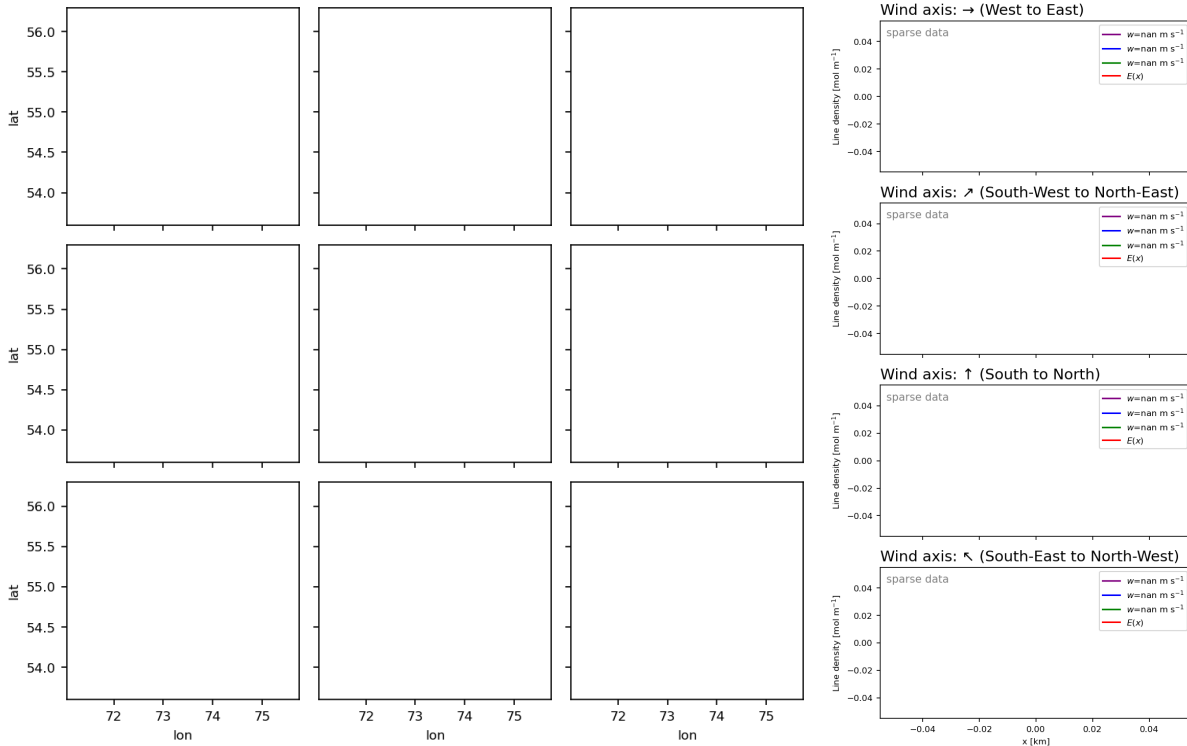

85.2 Spring

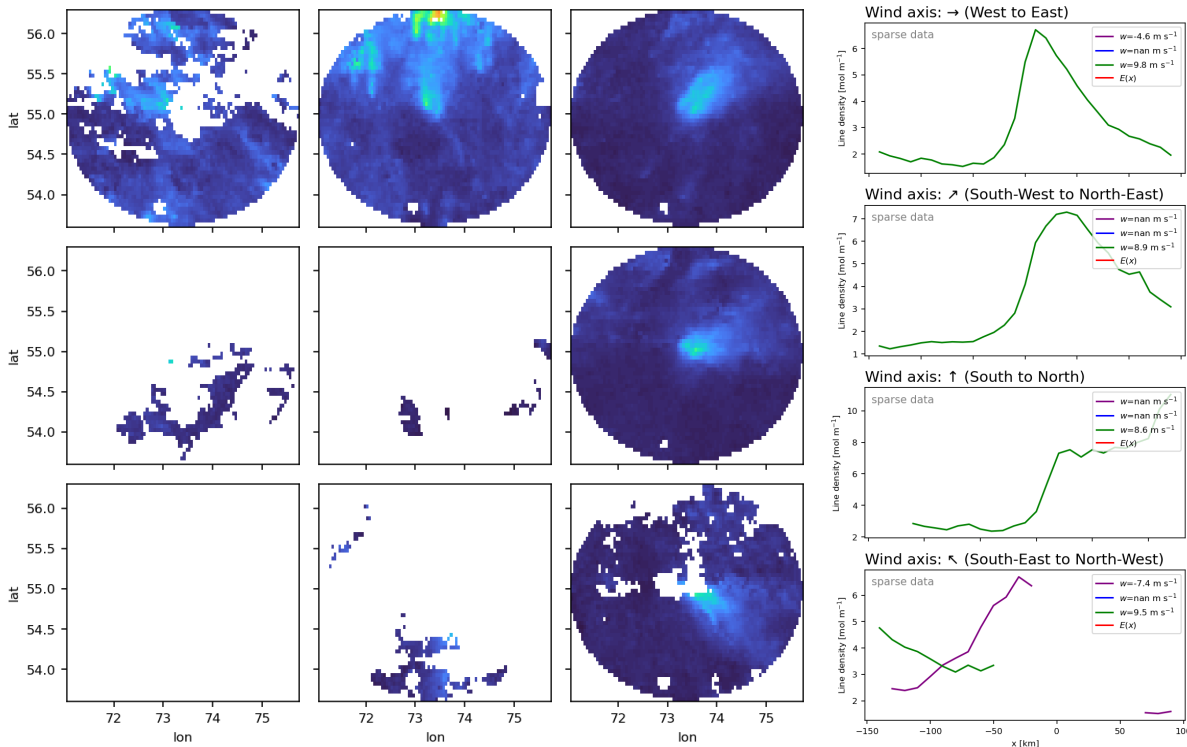

## 85.3 Summer

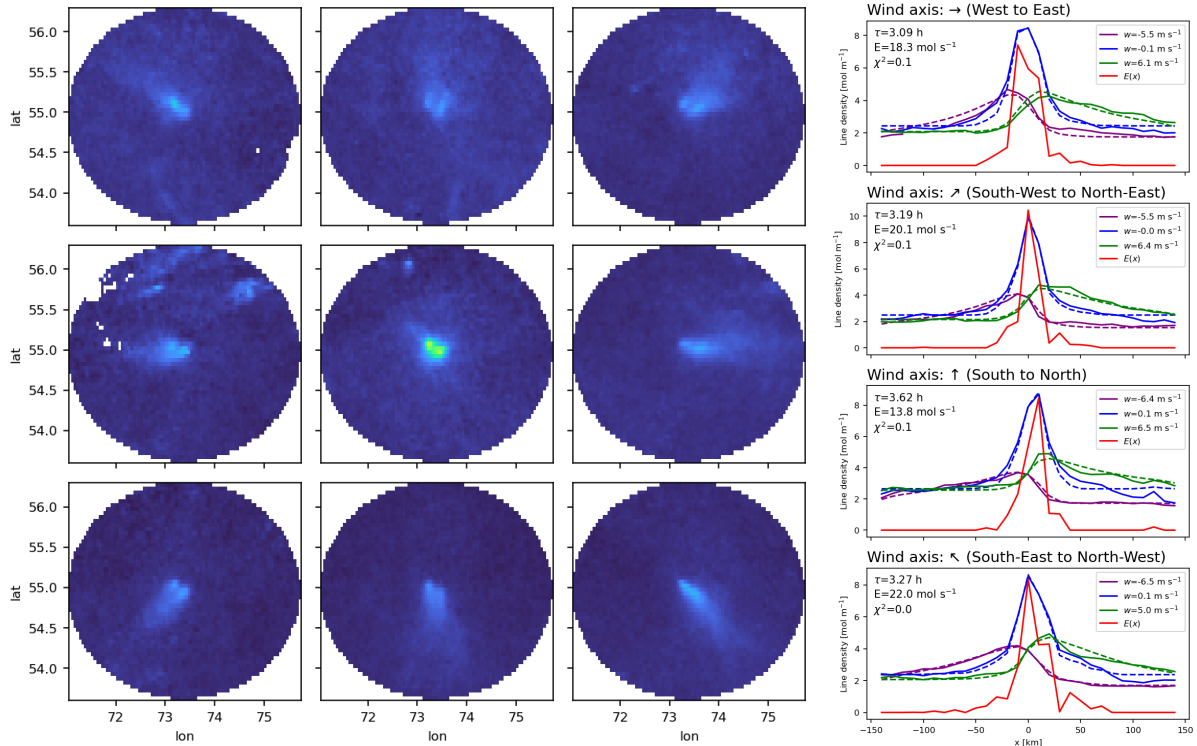

## 85.4 Autumn

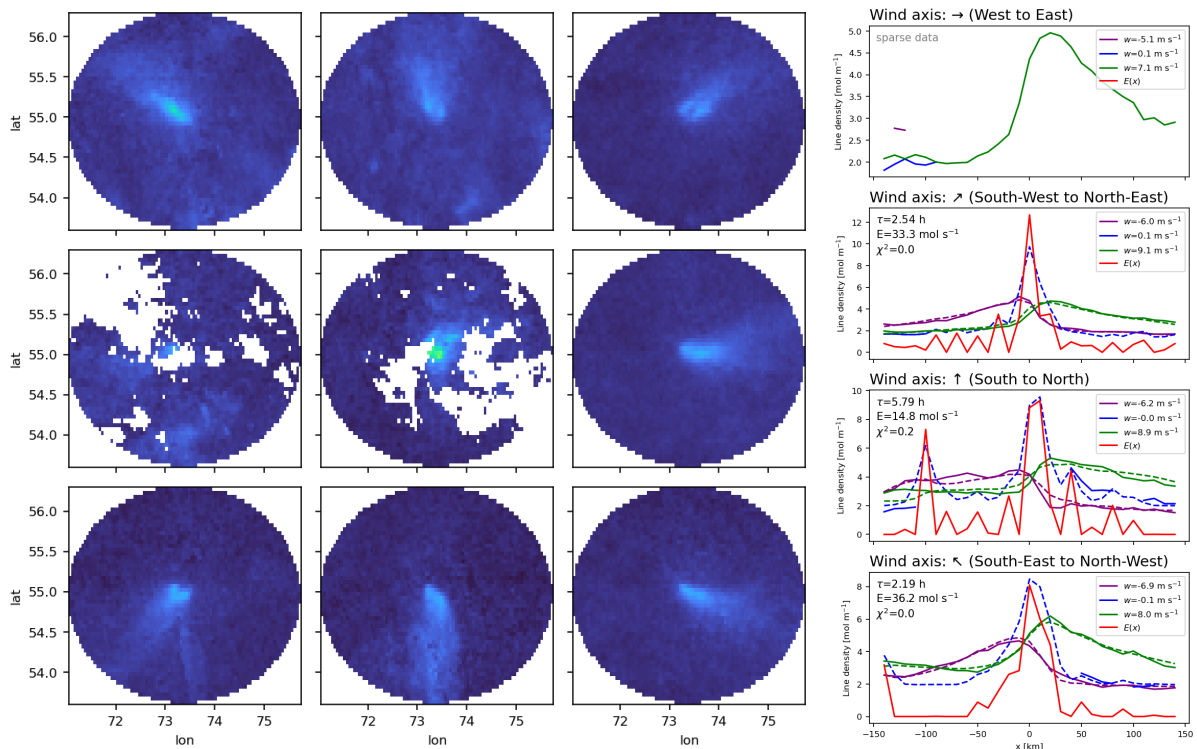

86.1 Winter

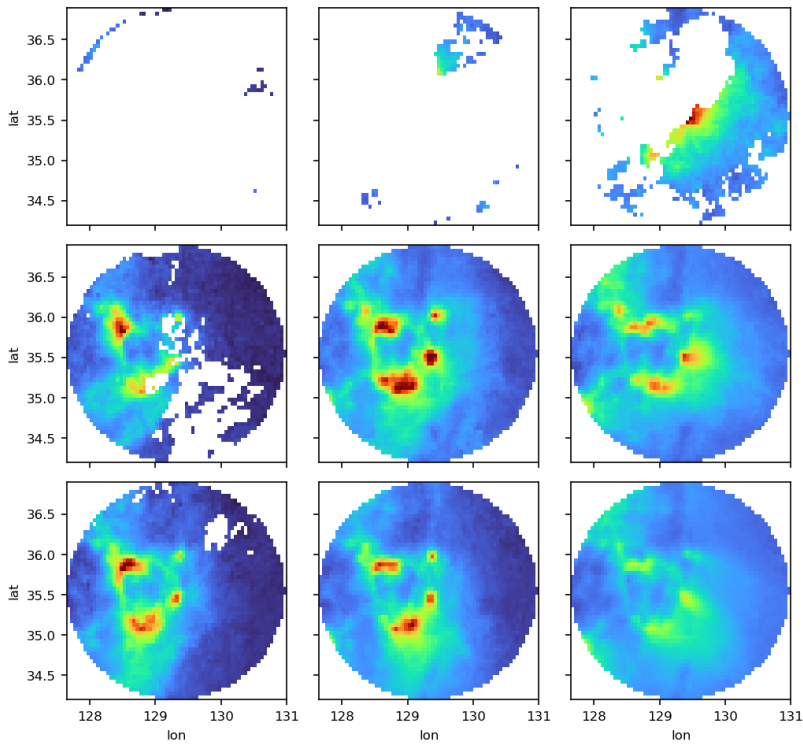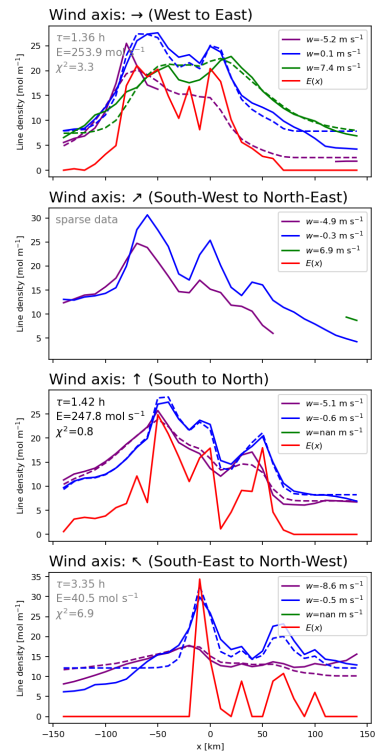

86.2 Spring

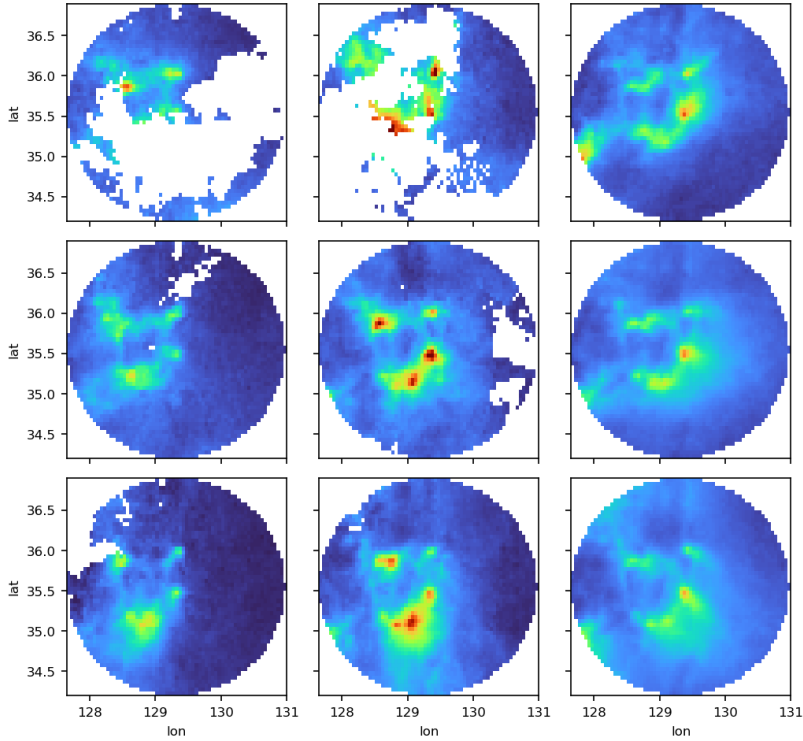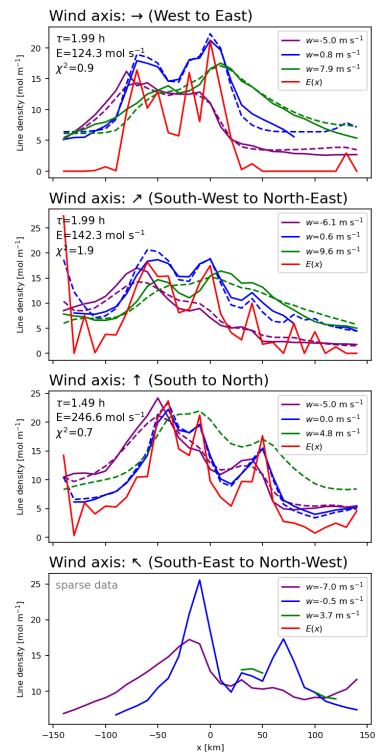

### 86.3 Summer

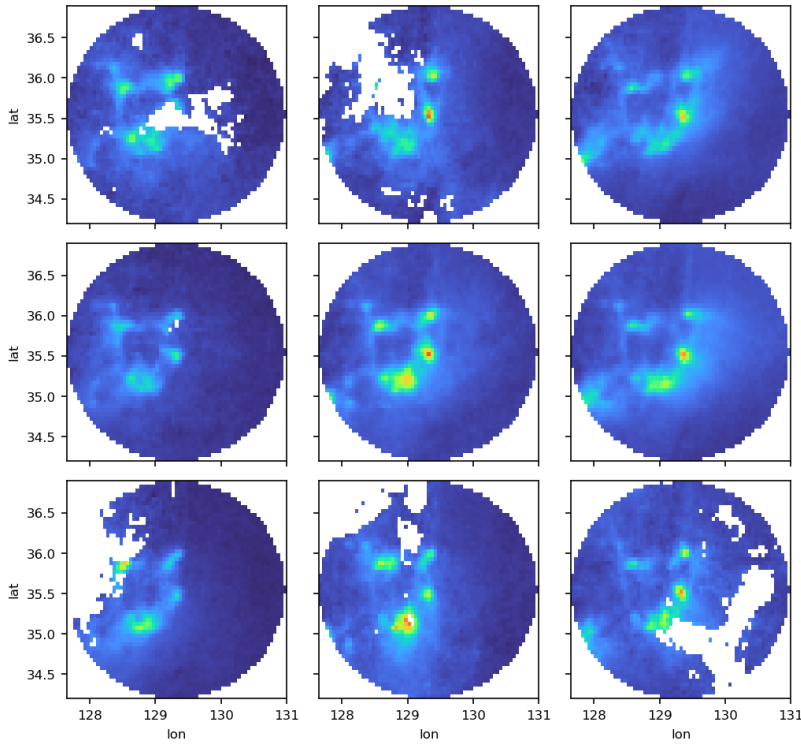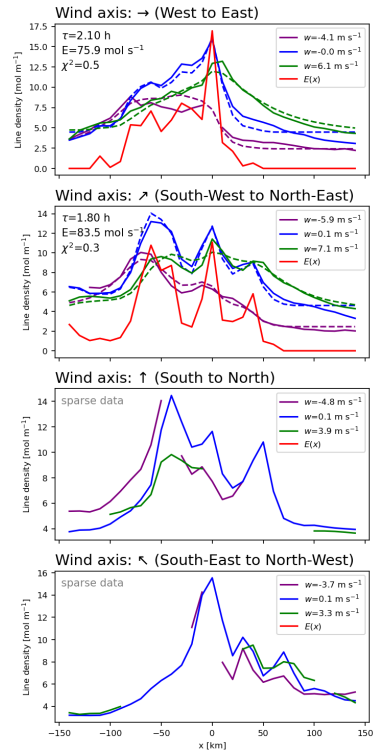

### 86.4 Autumn

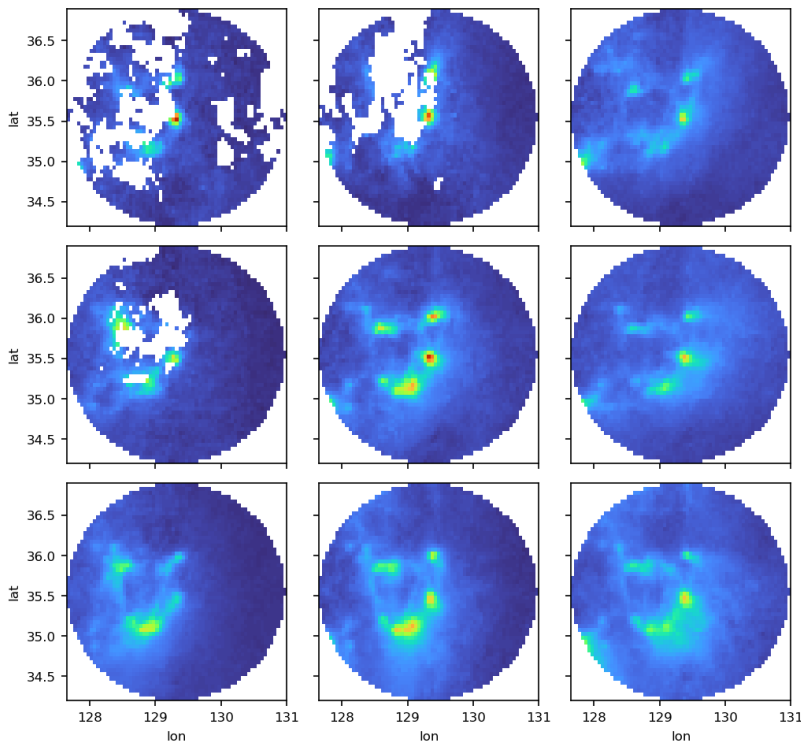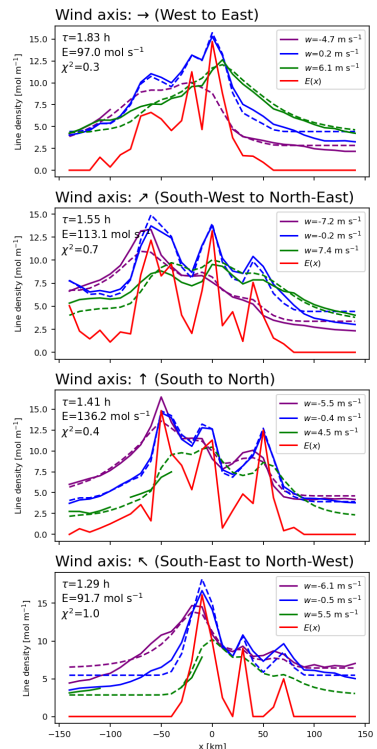

87.1 Winter

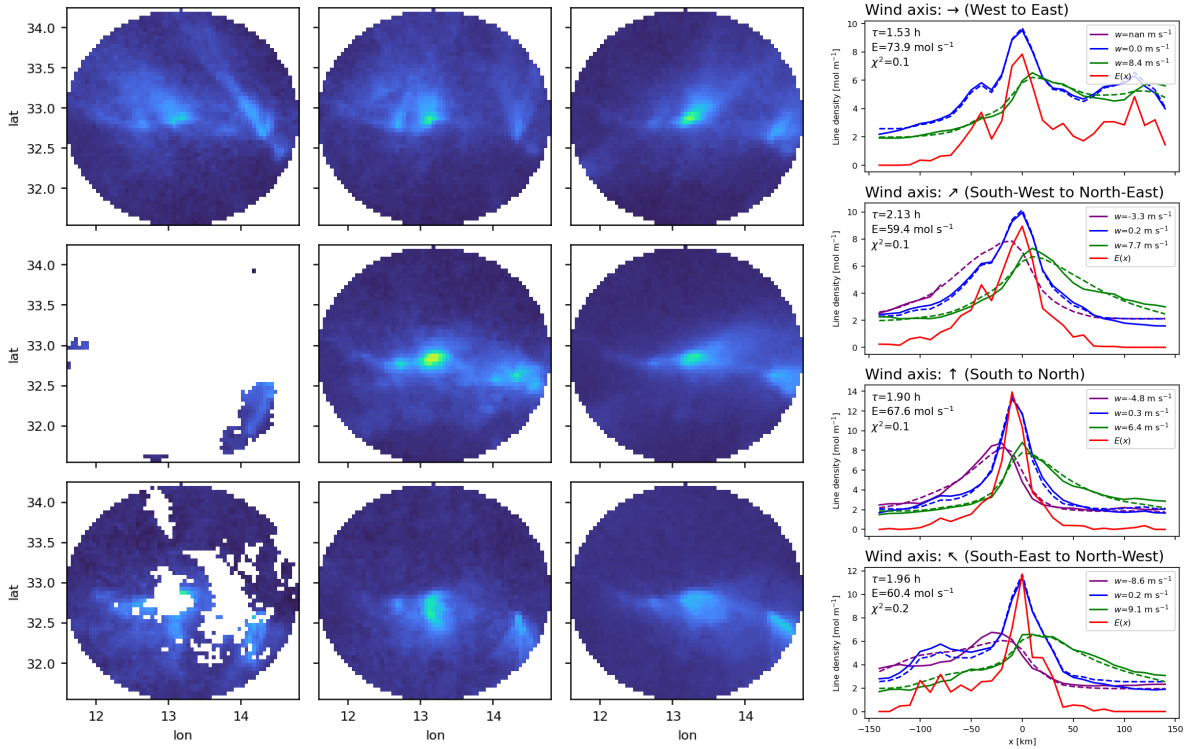

87.2 Spring

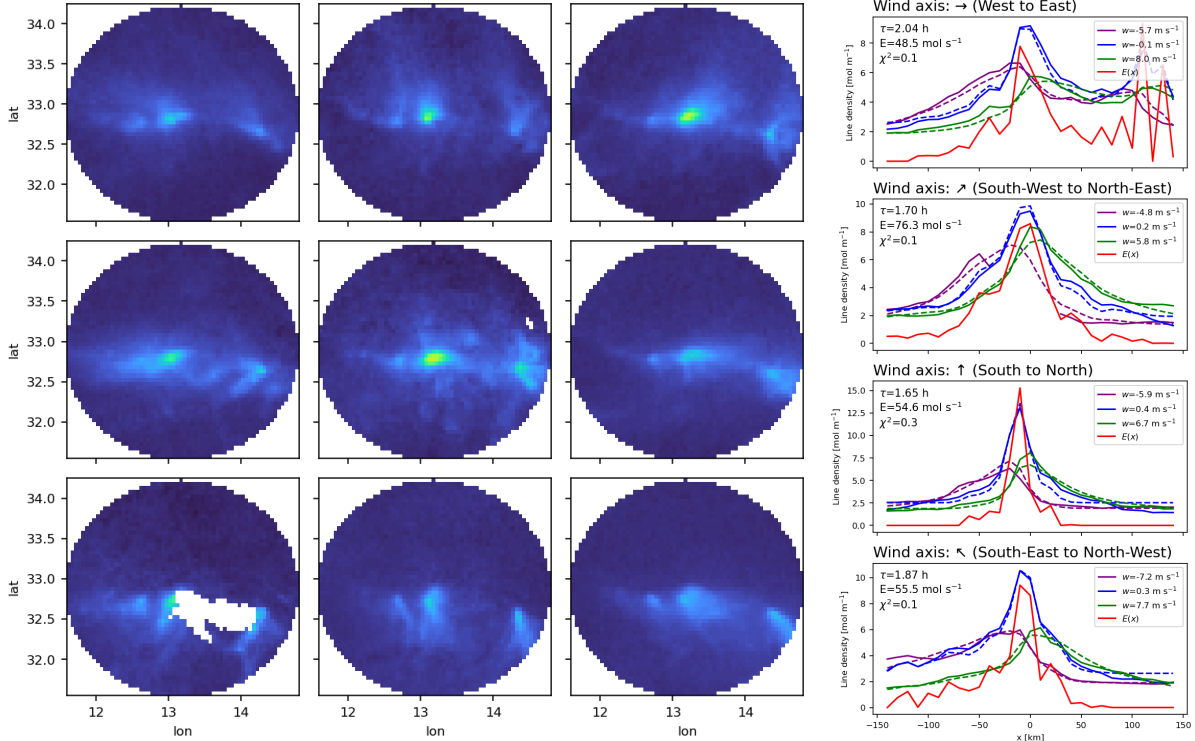

### 87.3 Summer

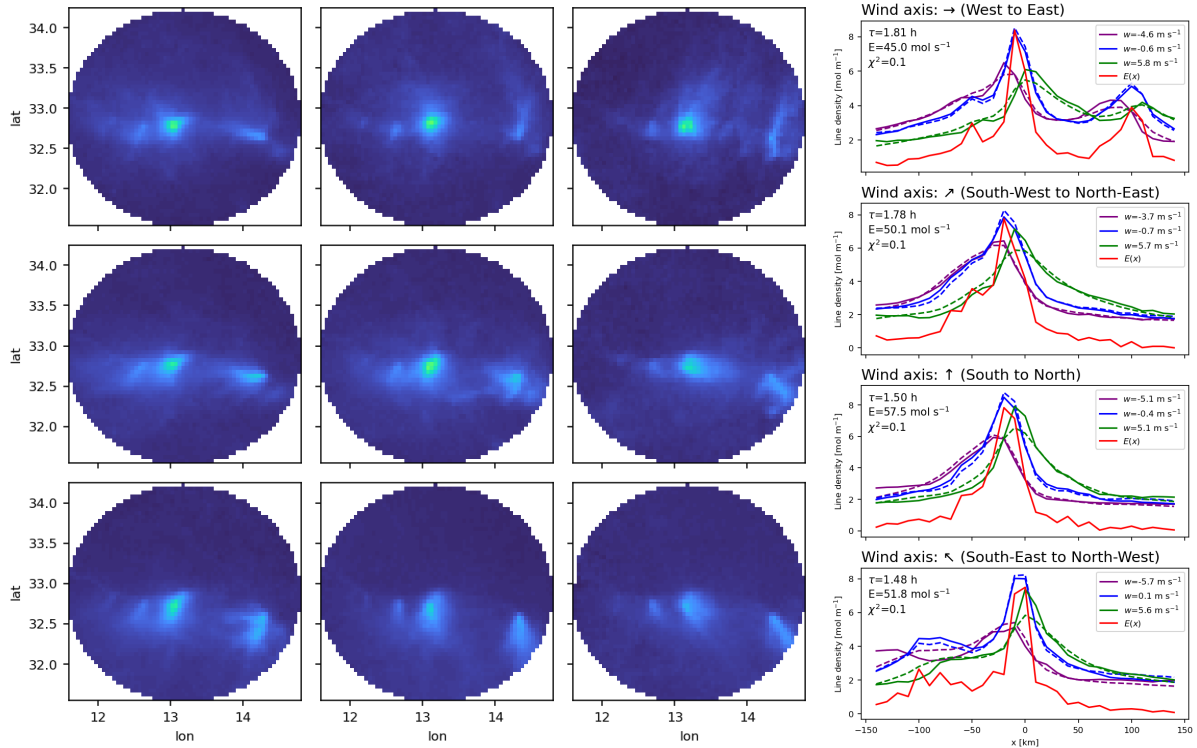

### 87.4 Autumn

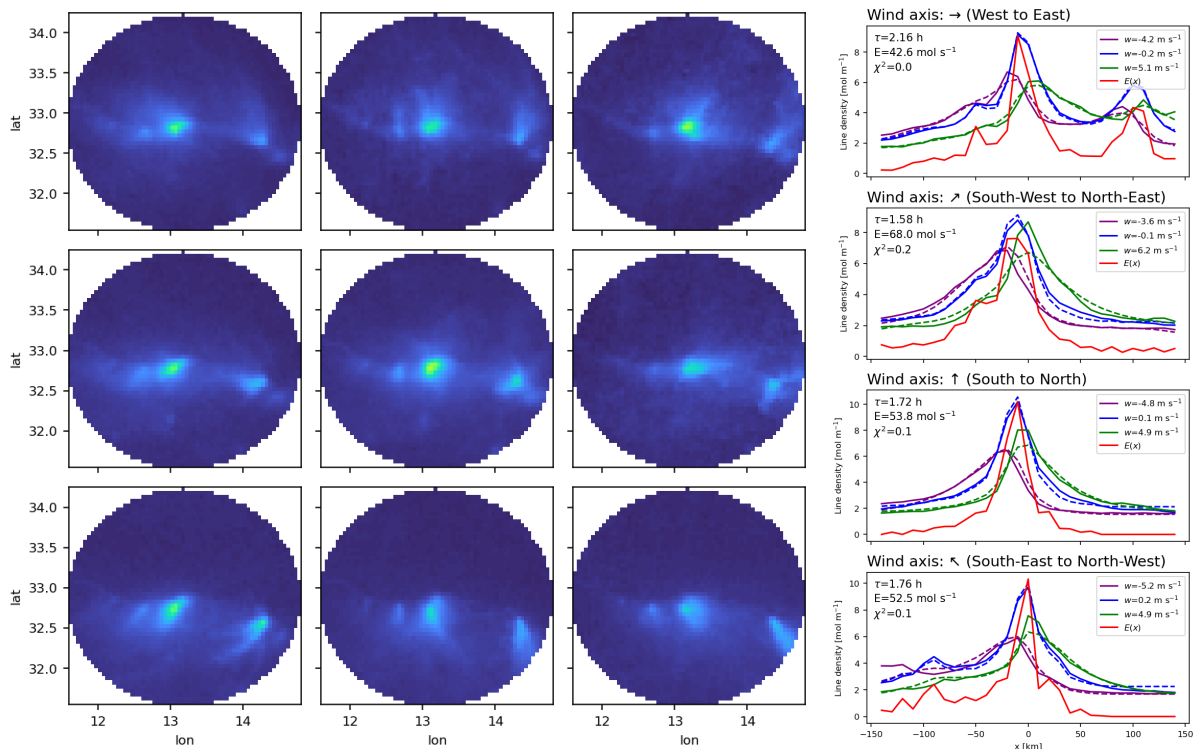



88.1 Winter

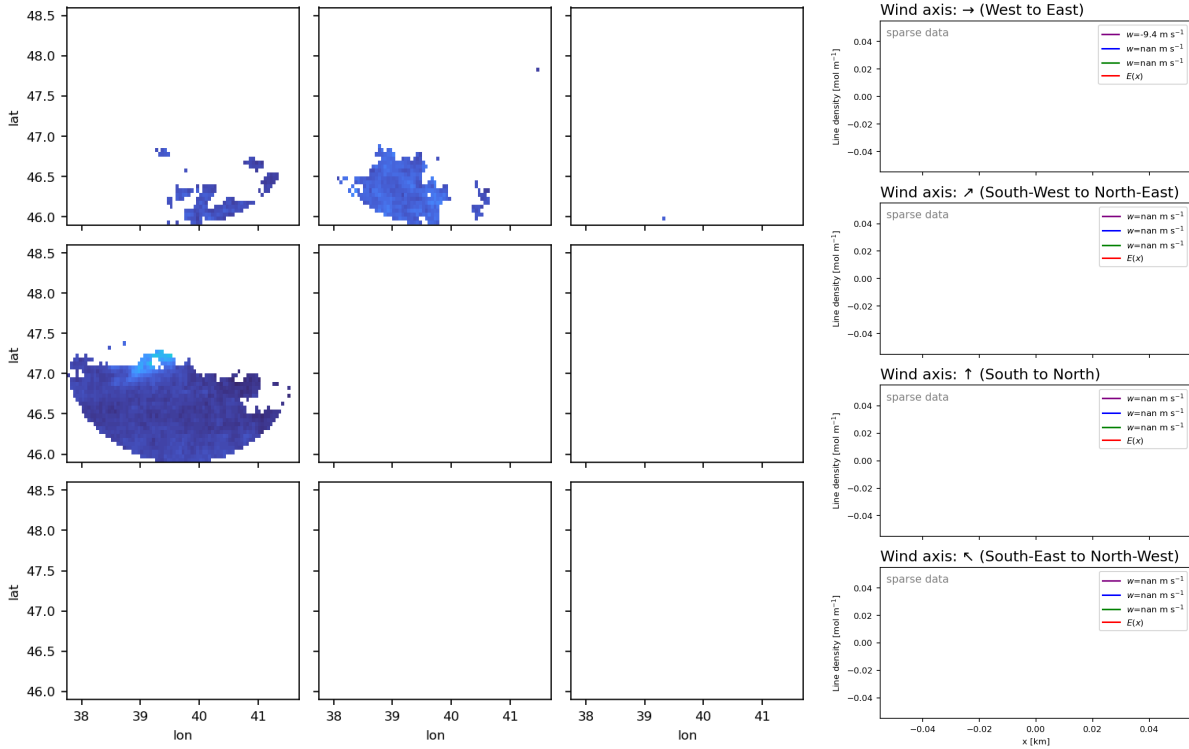

88.2 Spring

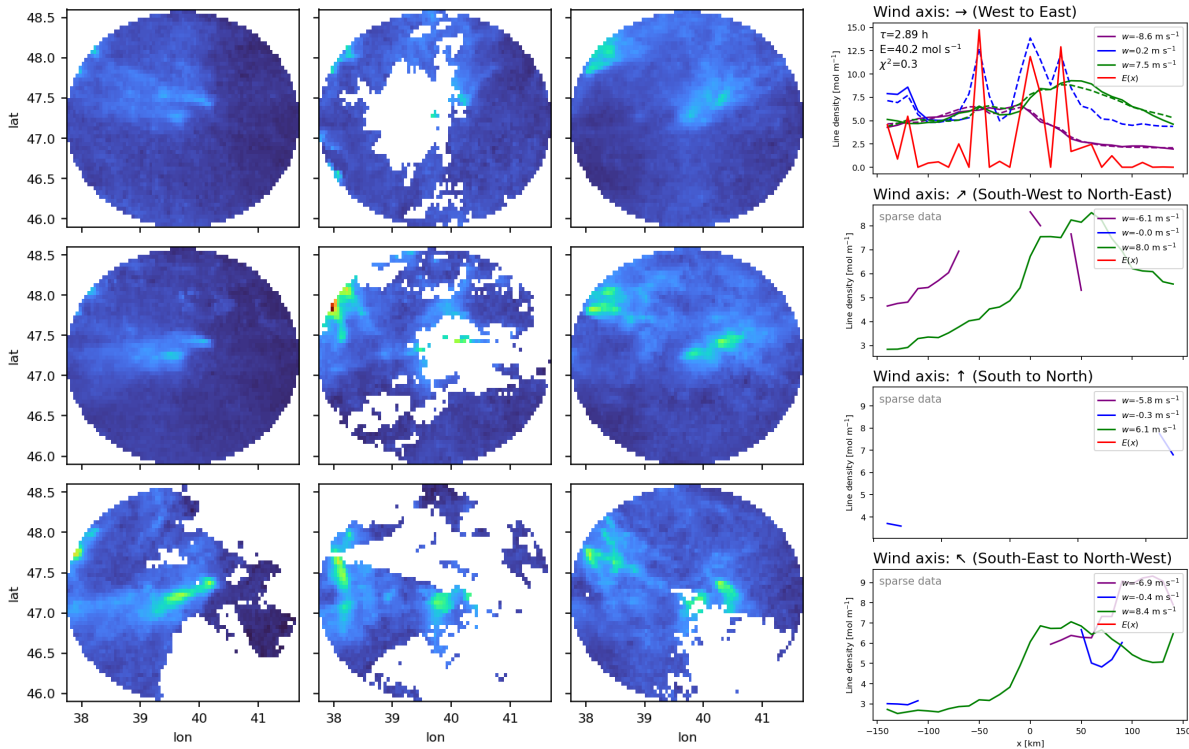

## 88.3 Summer

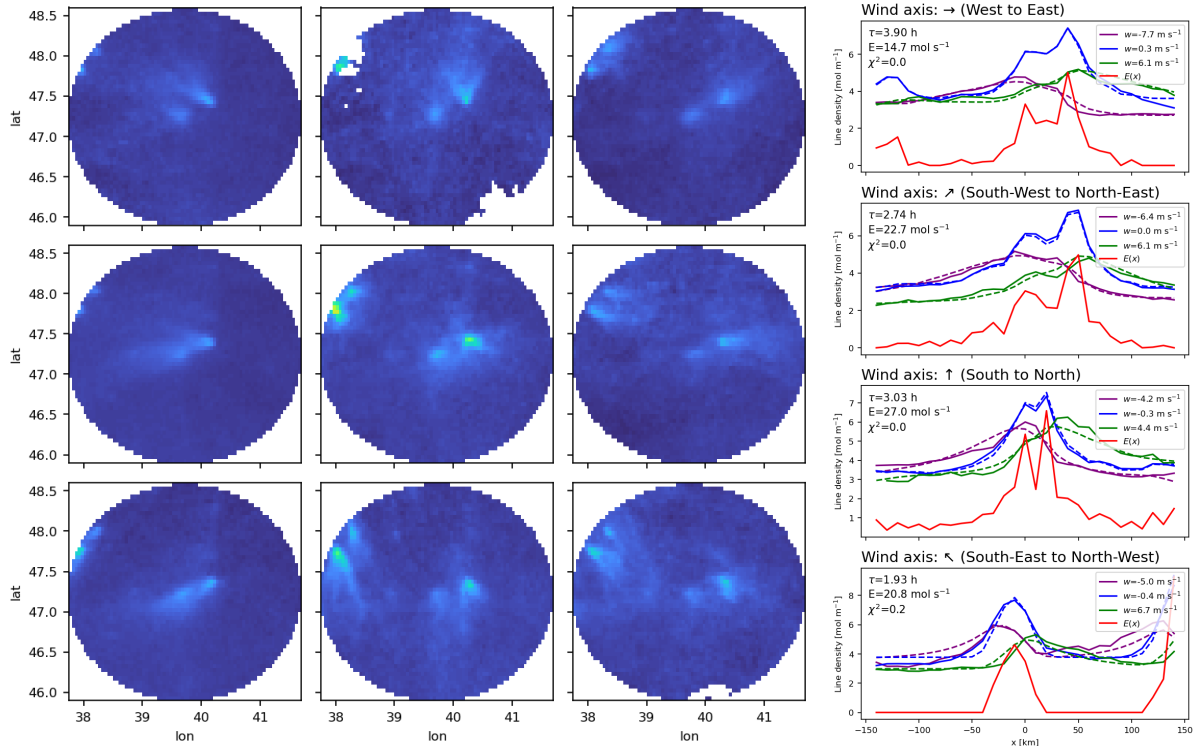

## 88.4 Autumn

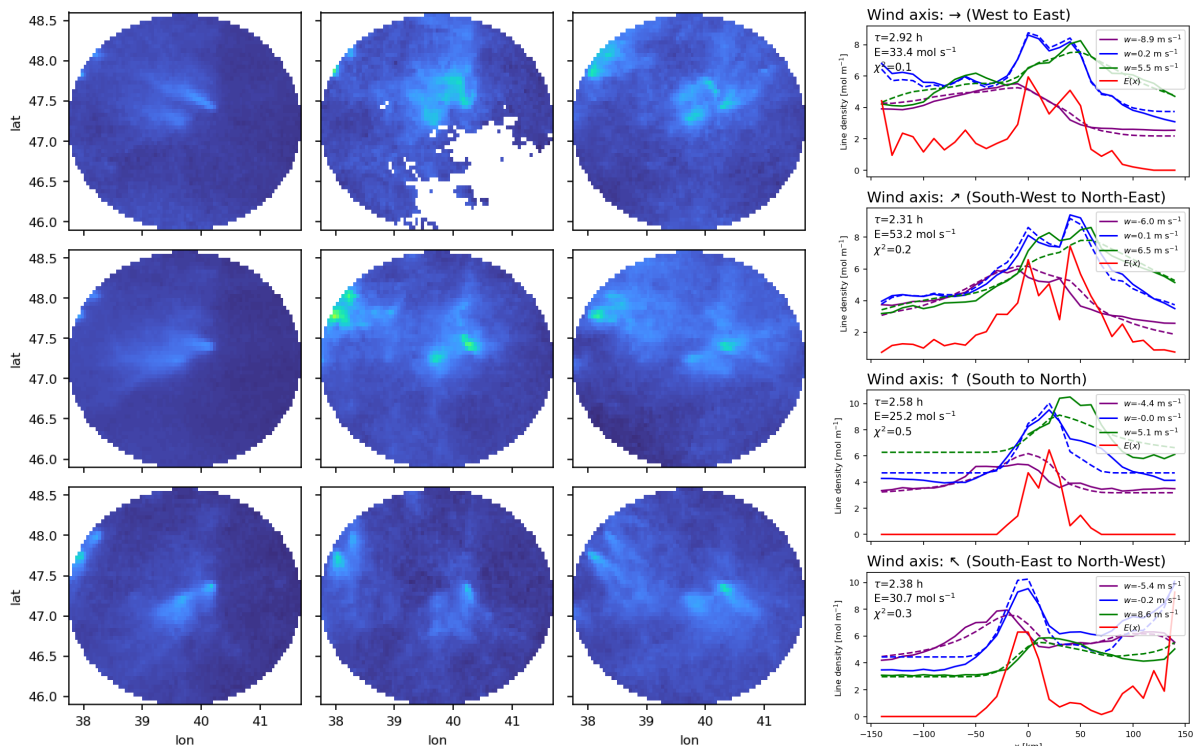

89.1 Winter

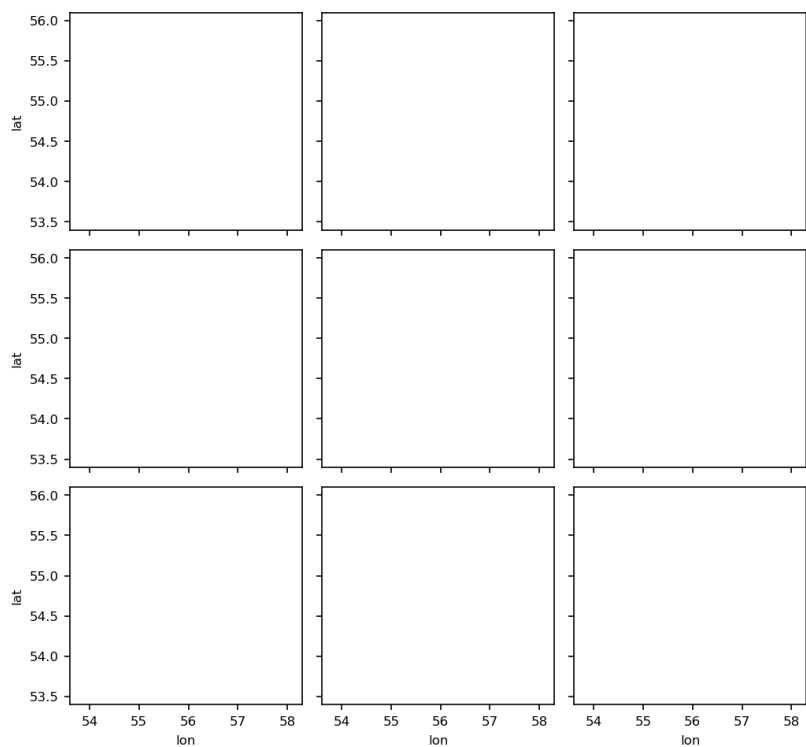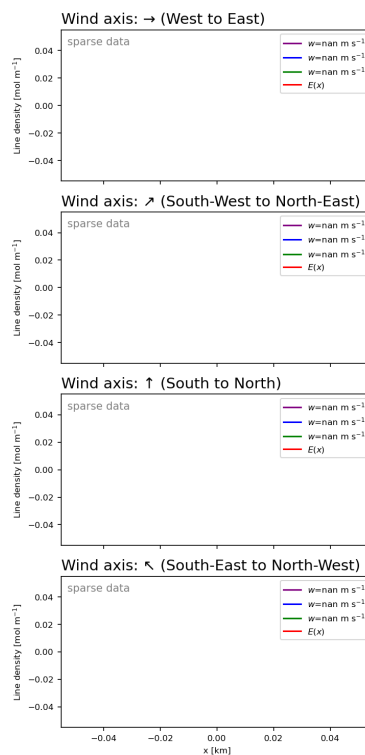

89.2 Spring

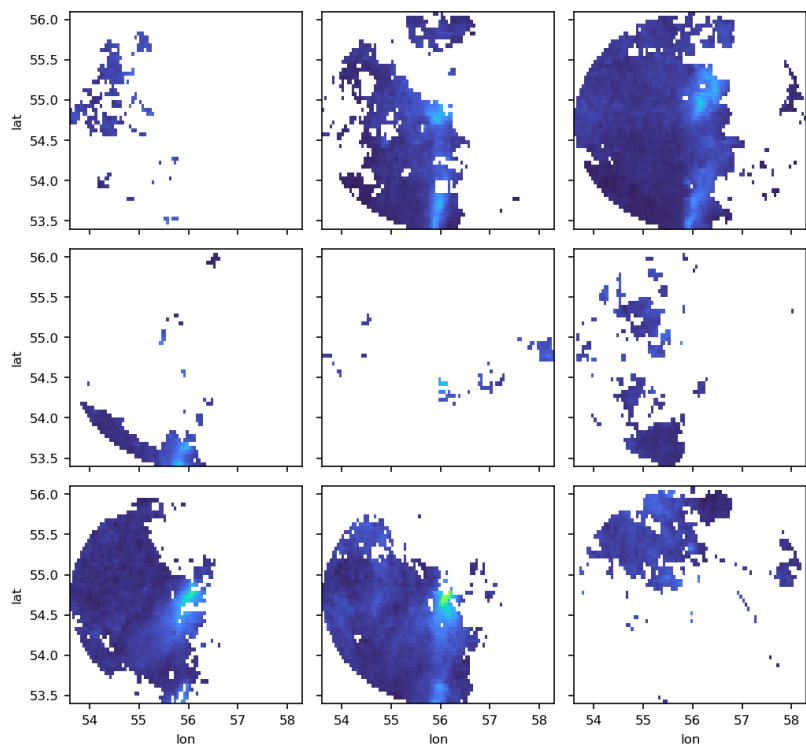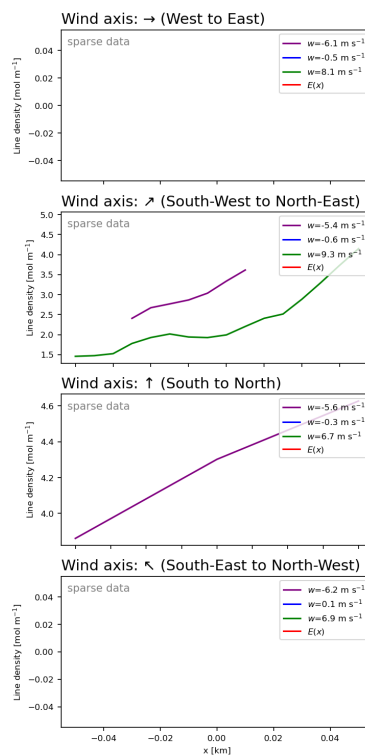

## 89.3 Summer

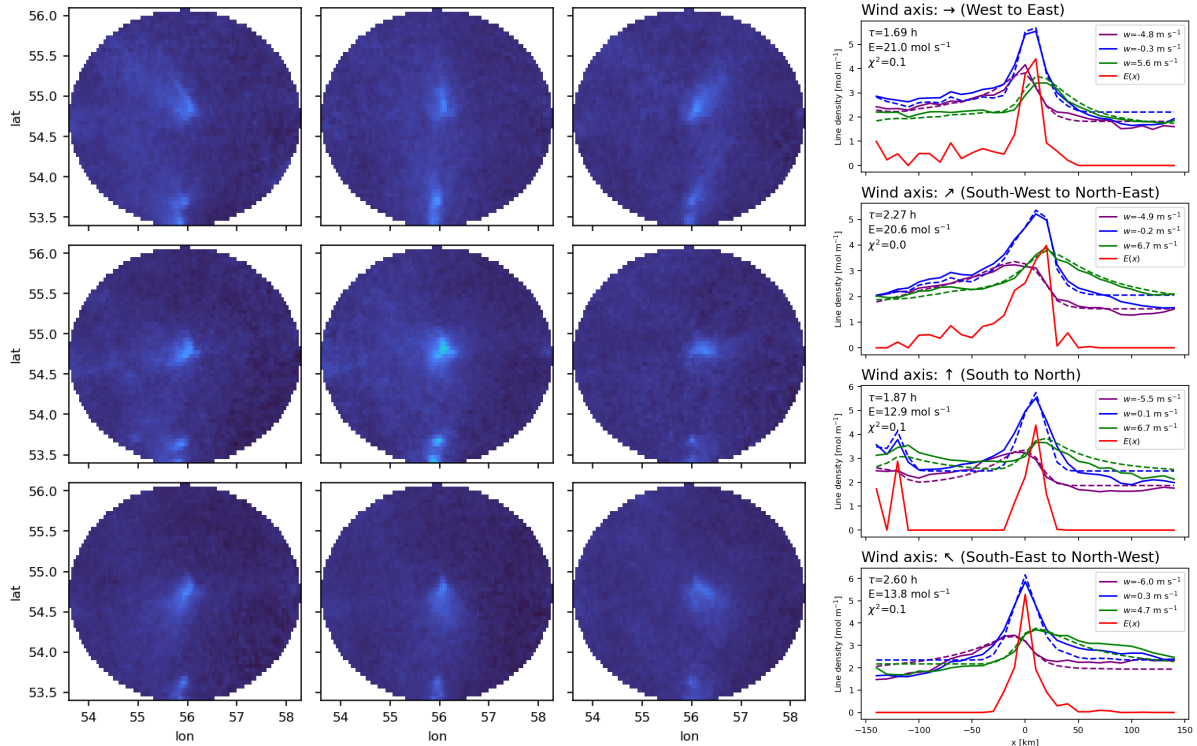

## 89.4 Autumn

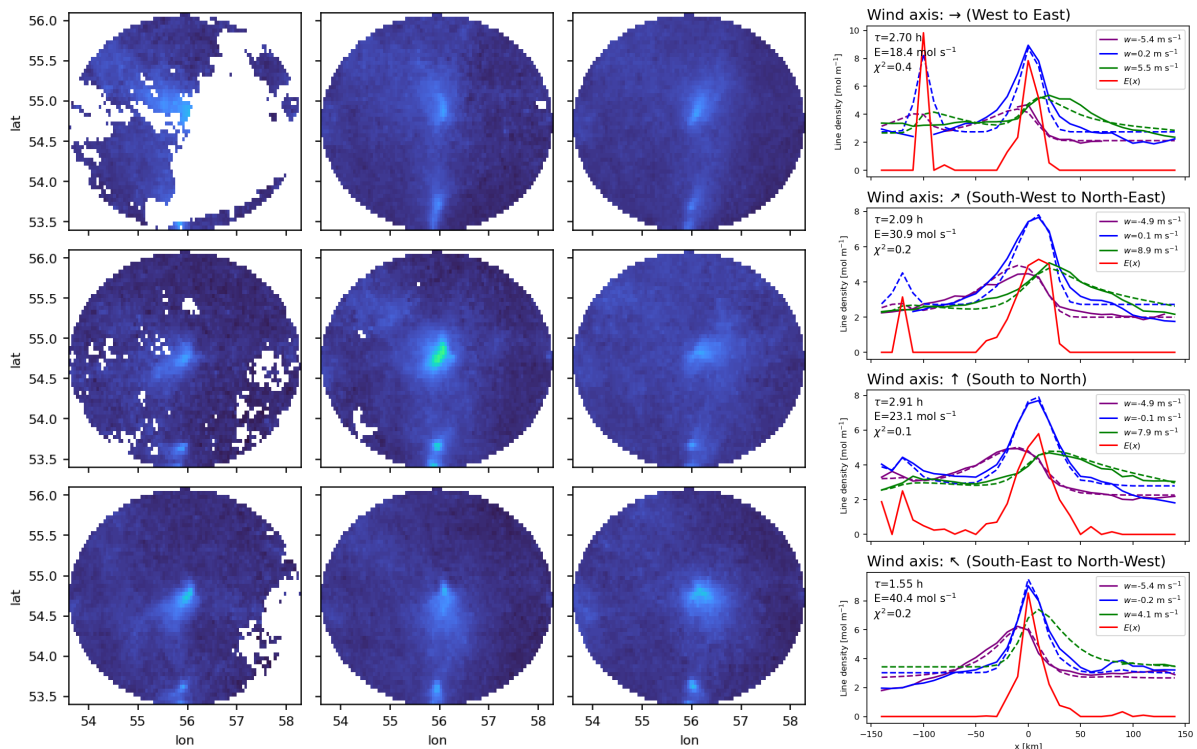

90.1 Winter

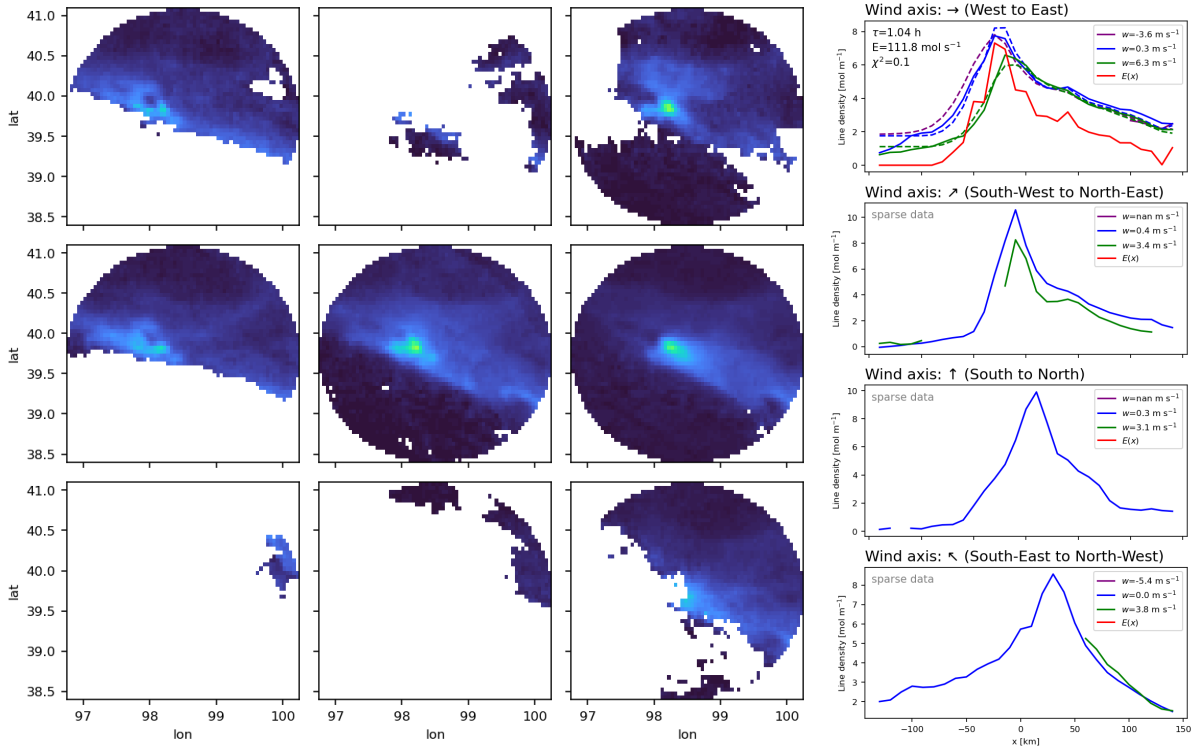

90.2 Spring

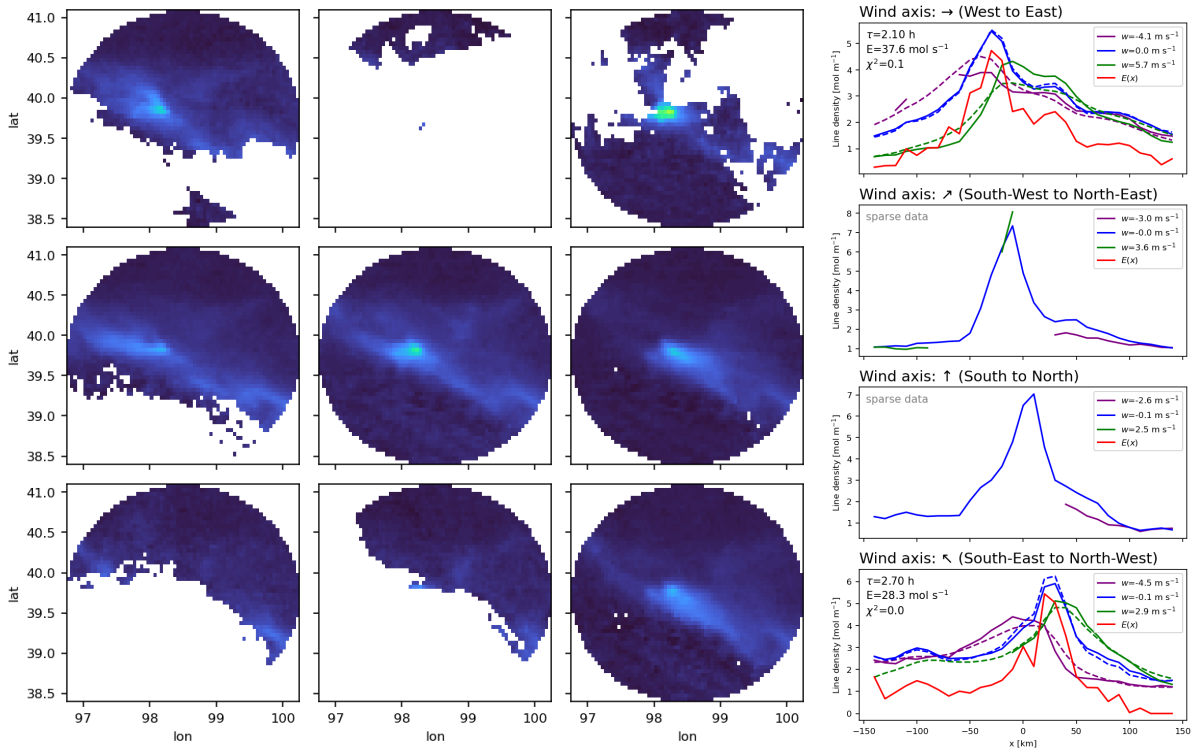

### 90.3 Summer

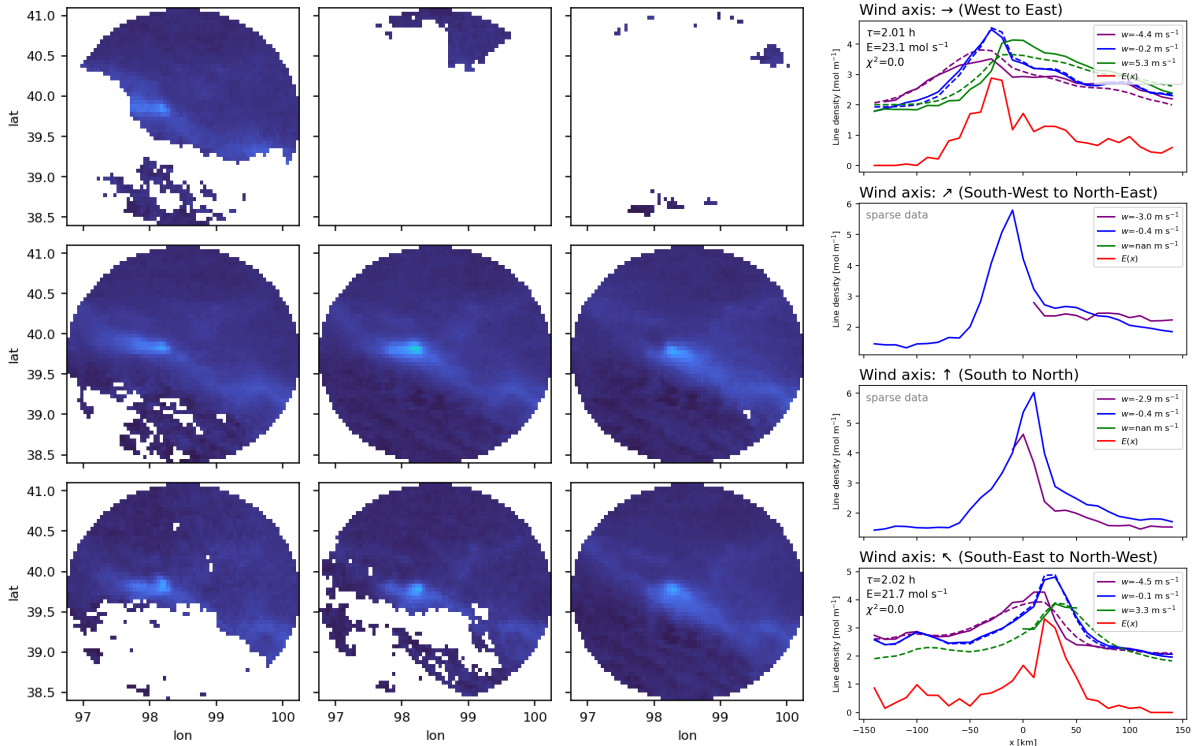

### 90.4 Autumn

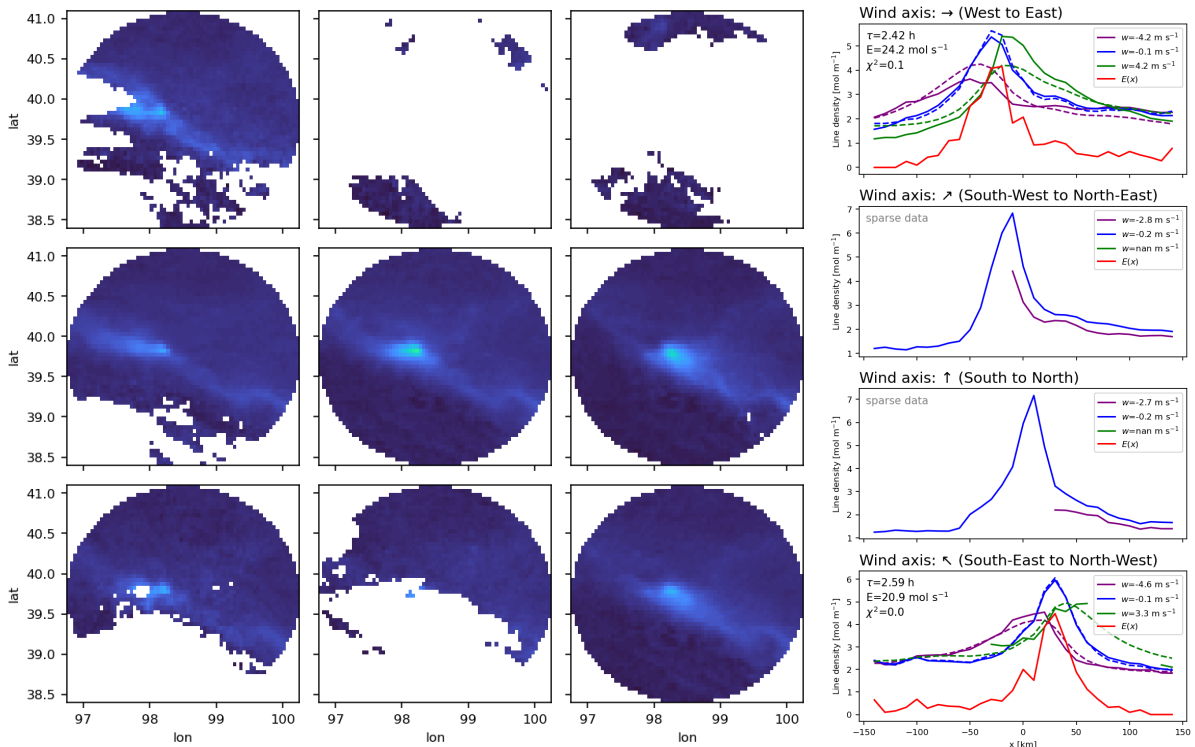

# 91 Copenhagen

## 91.1 Winter

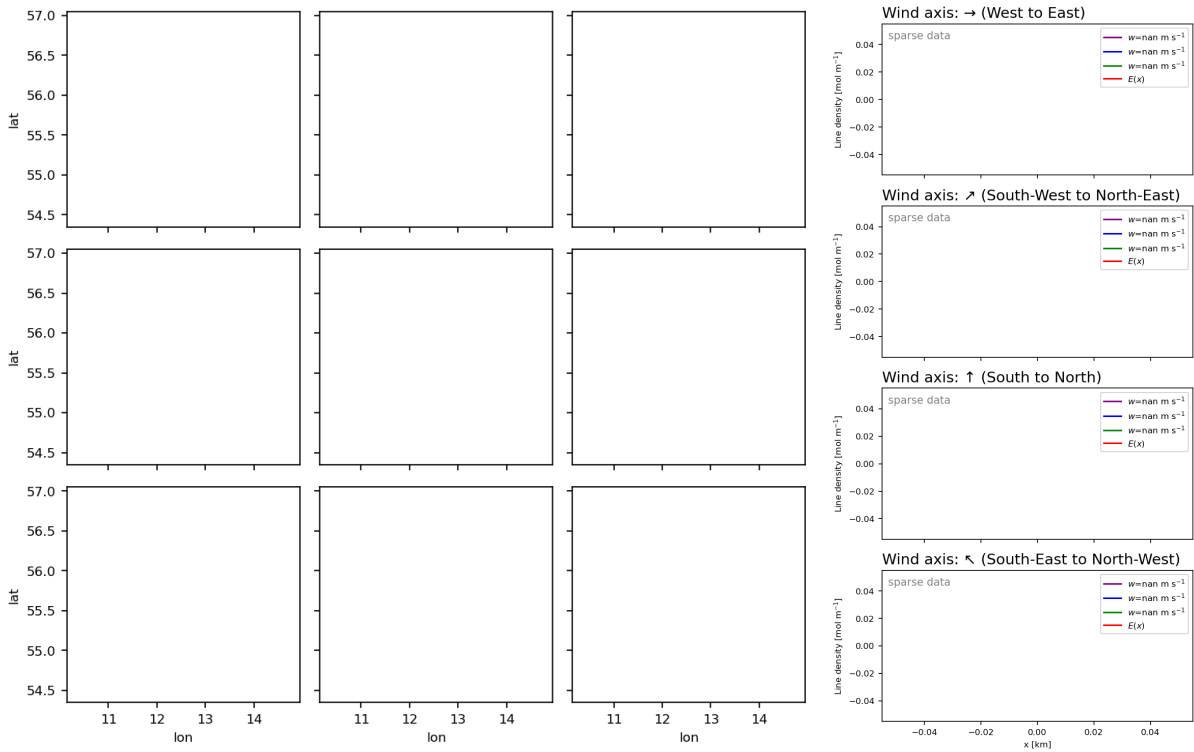

## 91.2 Spring

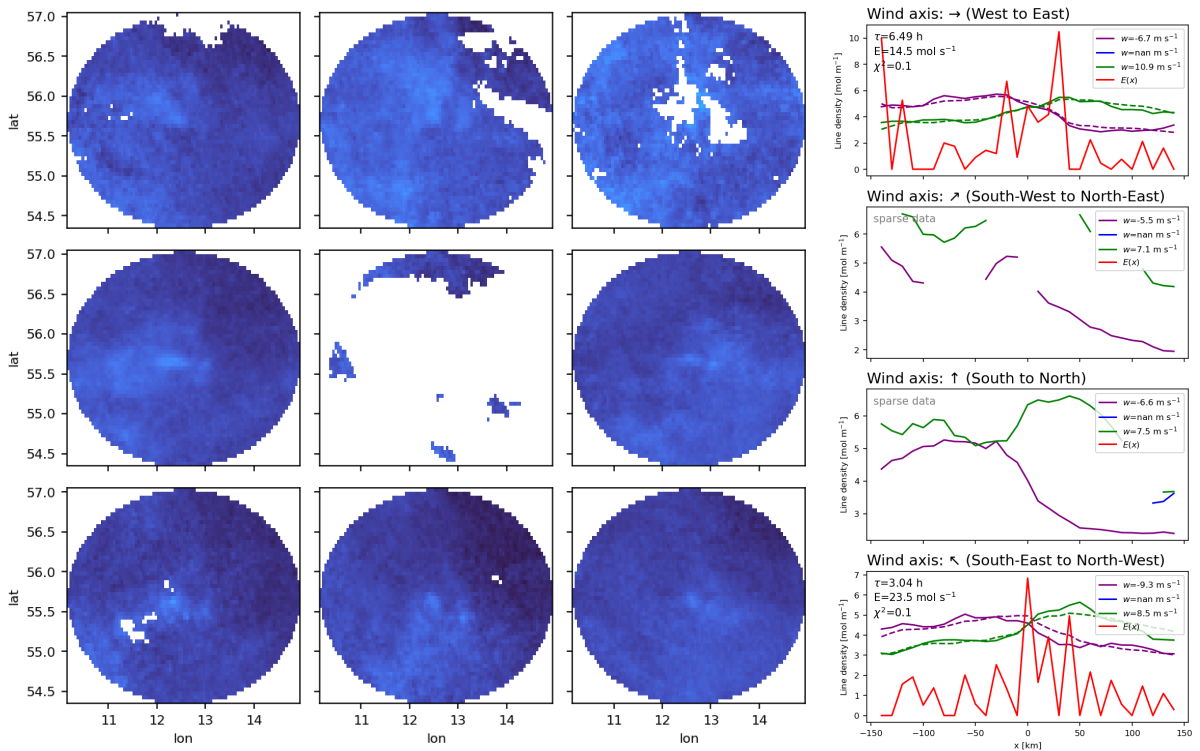

### 91.3 Summer

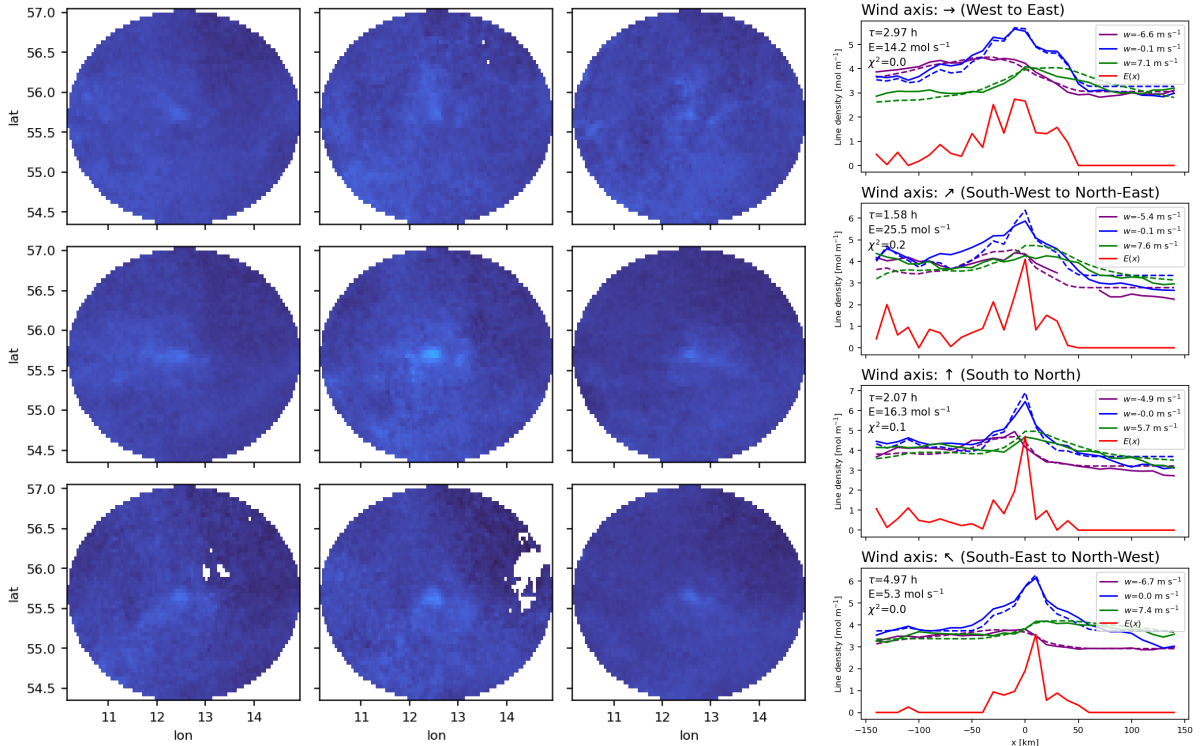

### 91.4 Autumn

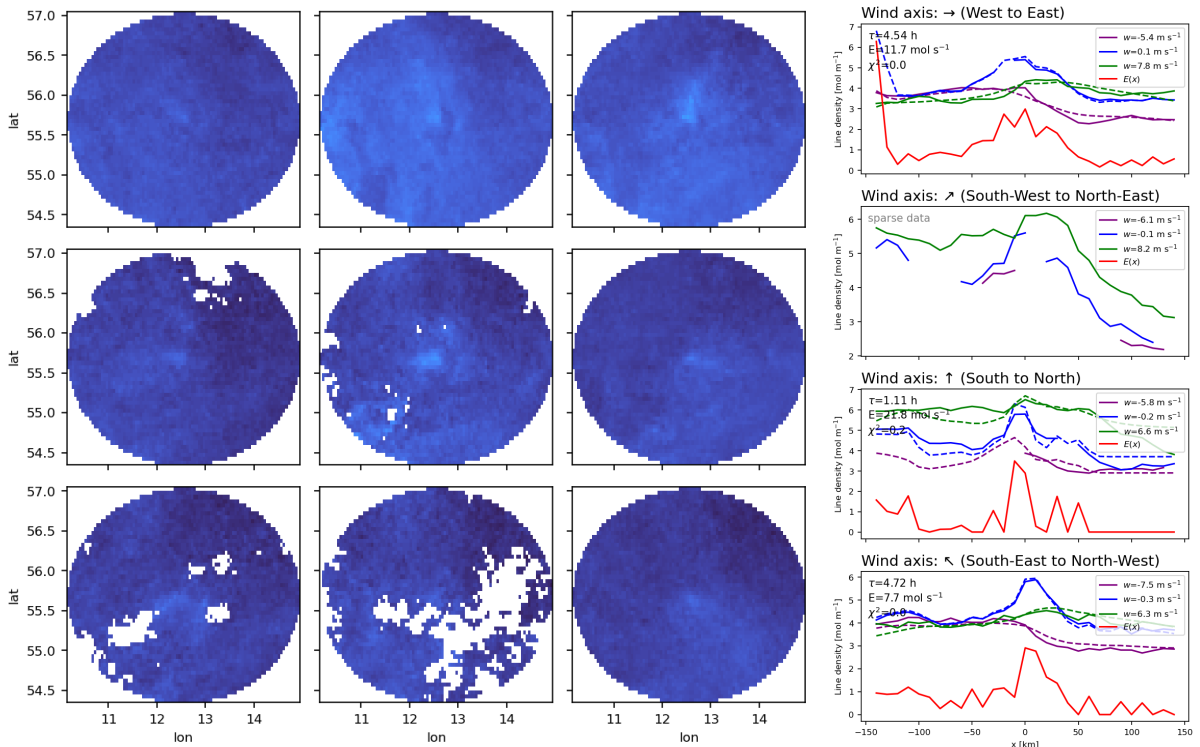



92.1 Winter

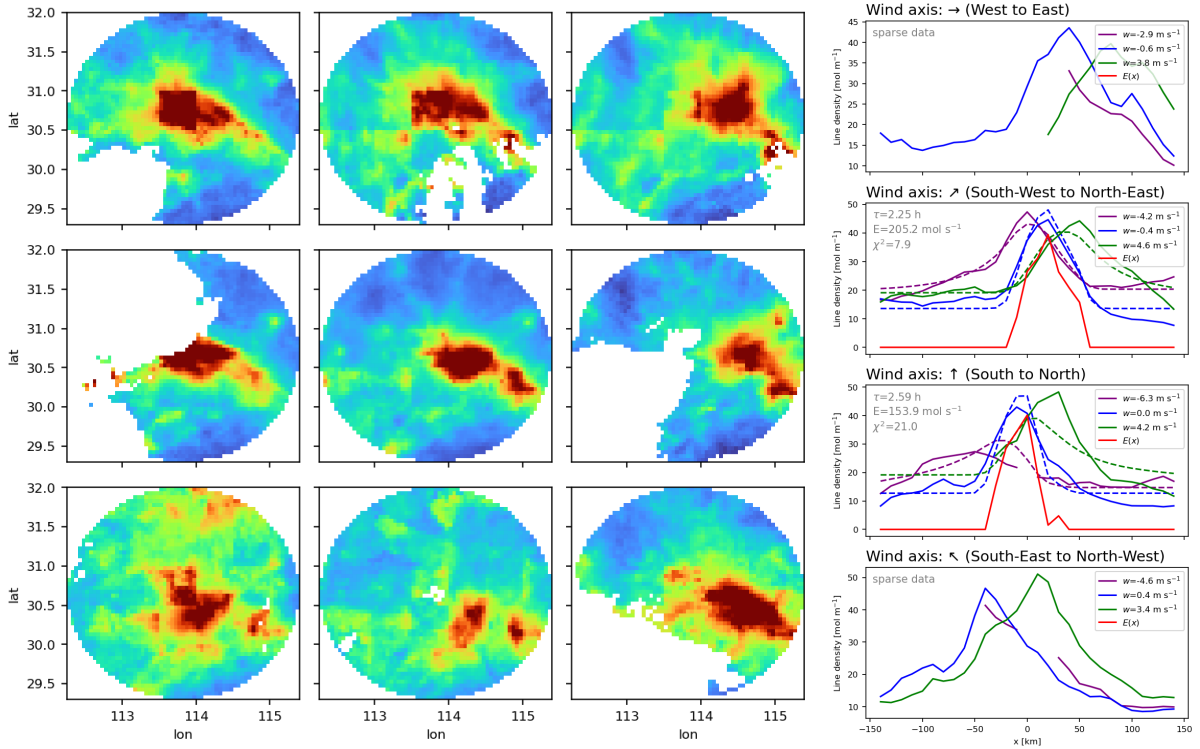

92.2 Spring

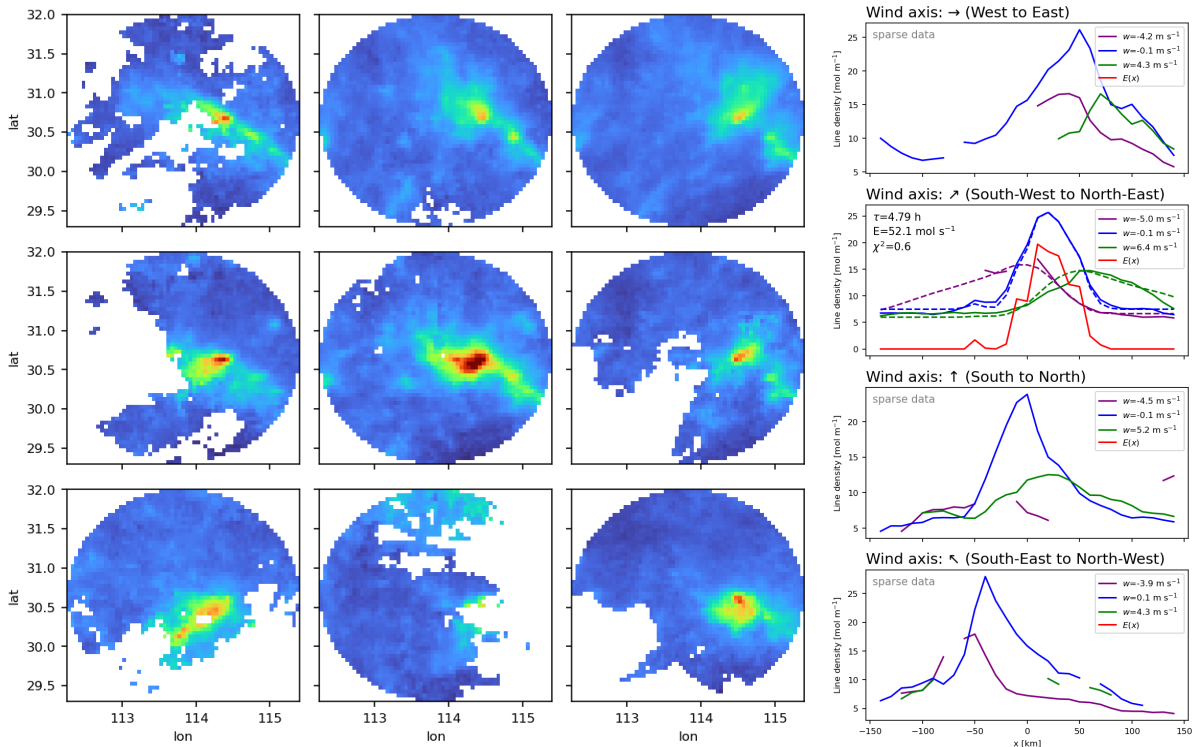

## 92.3 Summer

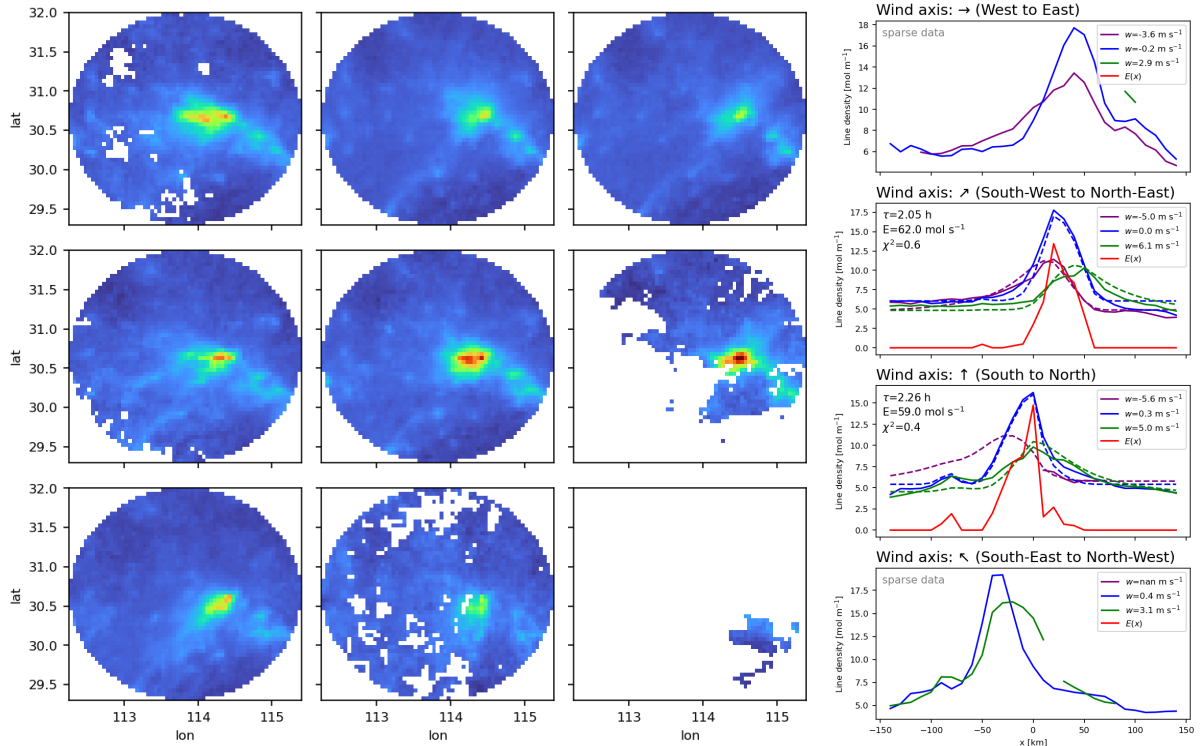

## 92.4 Autumn

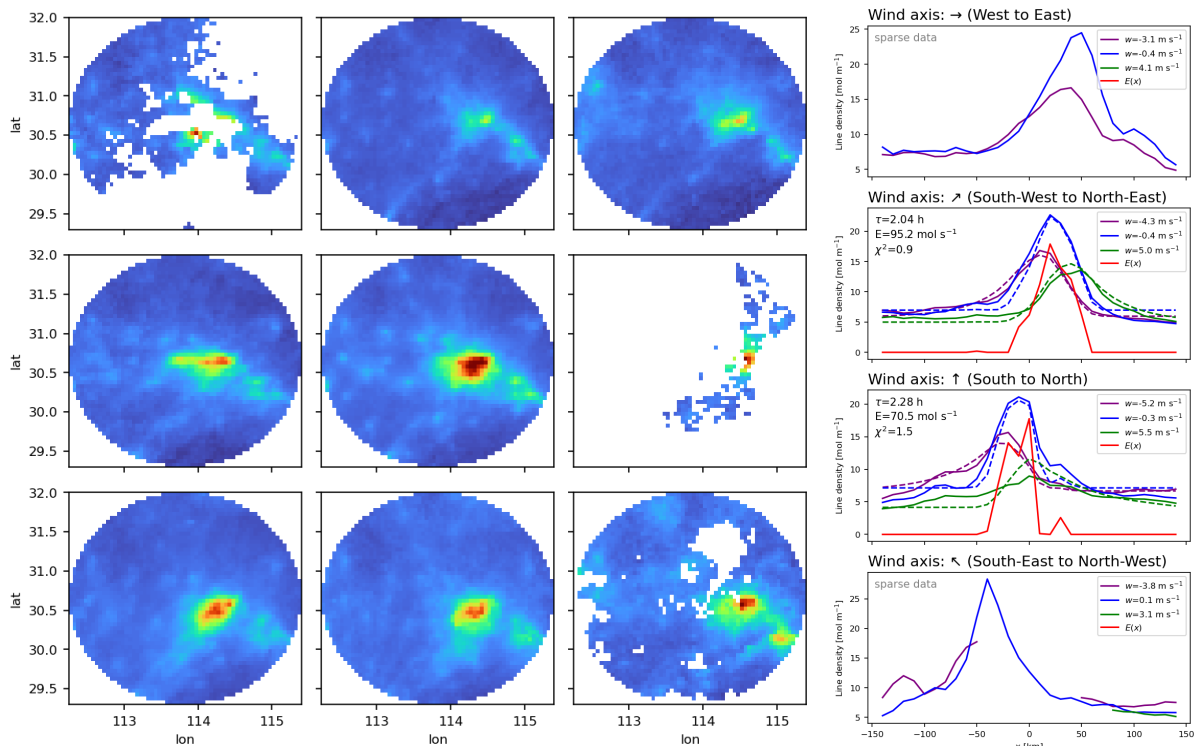

## 93 Krasnoyarsk

### 93.1 Winter

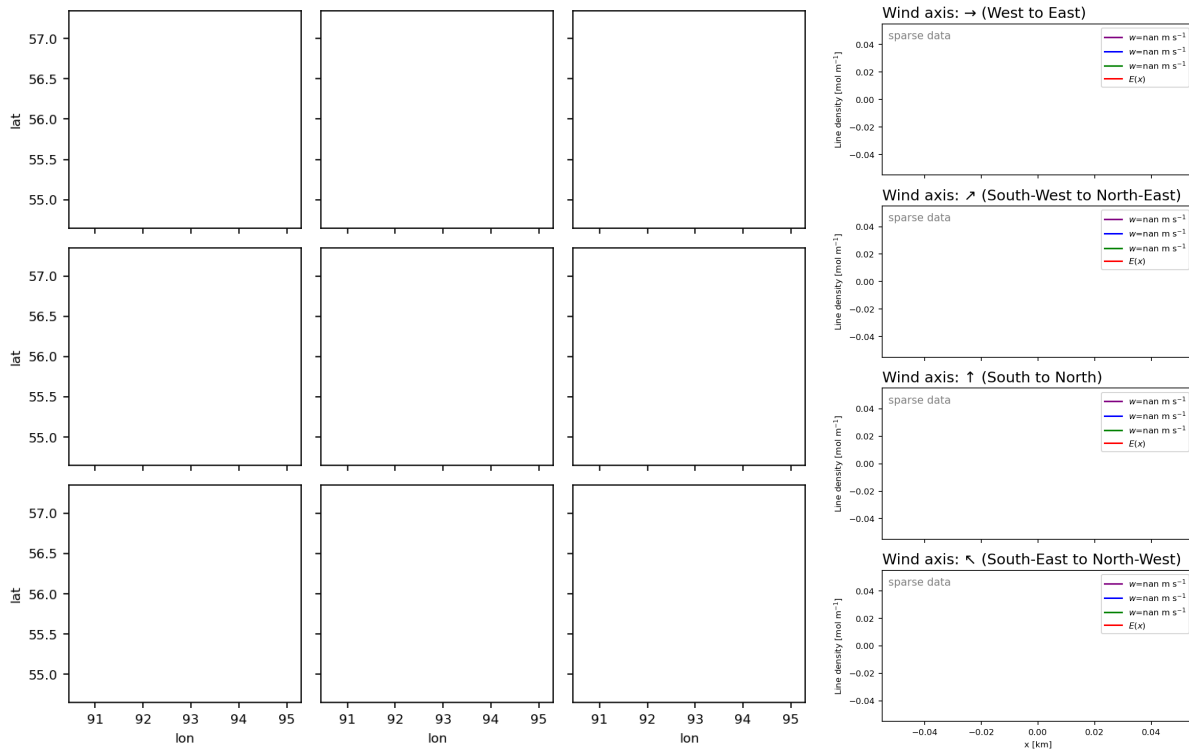

### 93.2 Spring

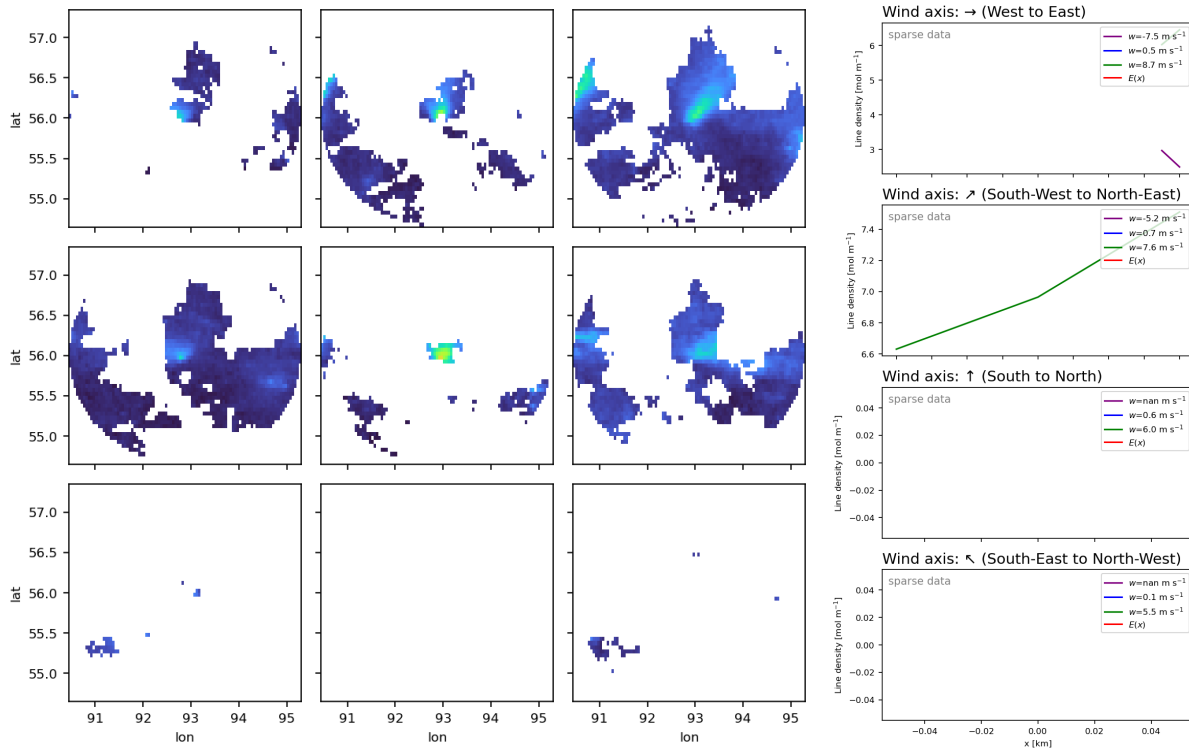

### 93.3 Summer

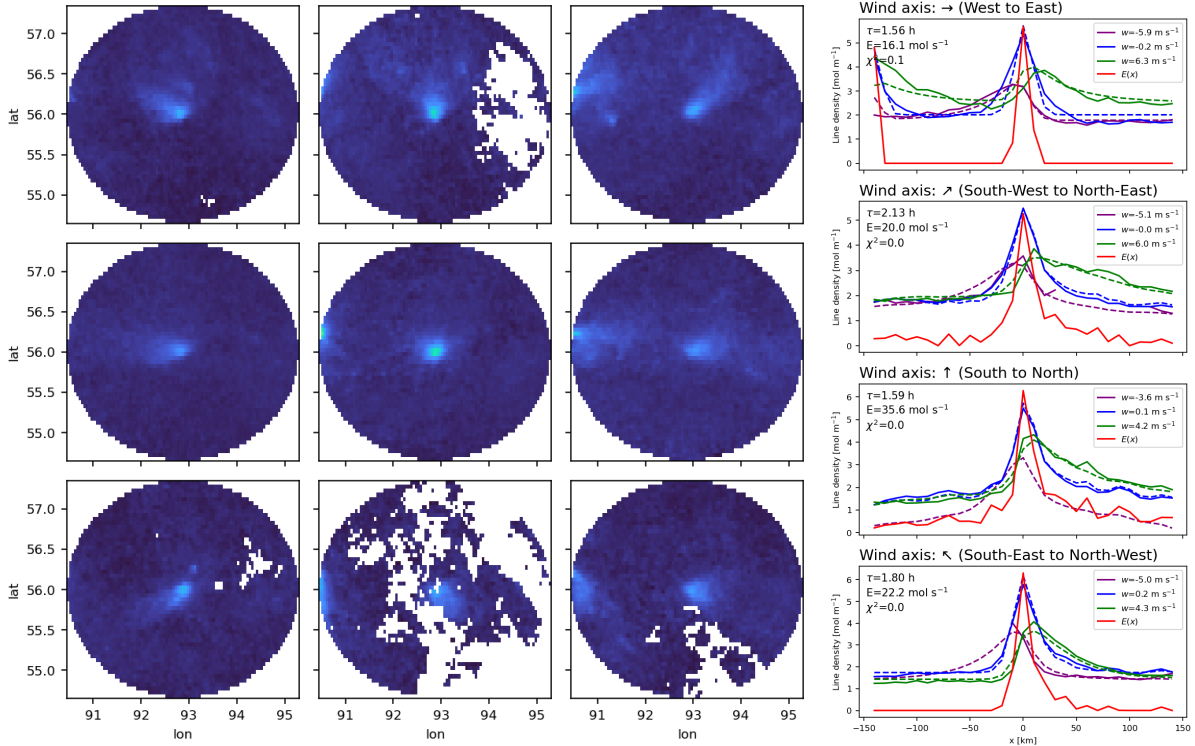

### 93.4 Autumn

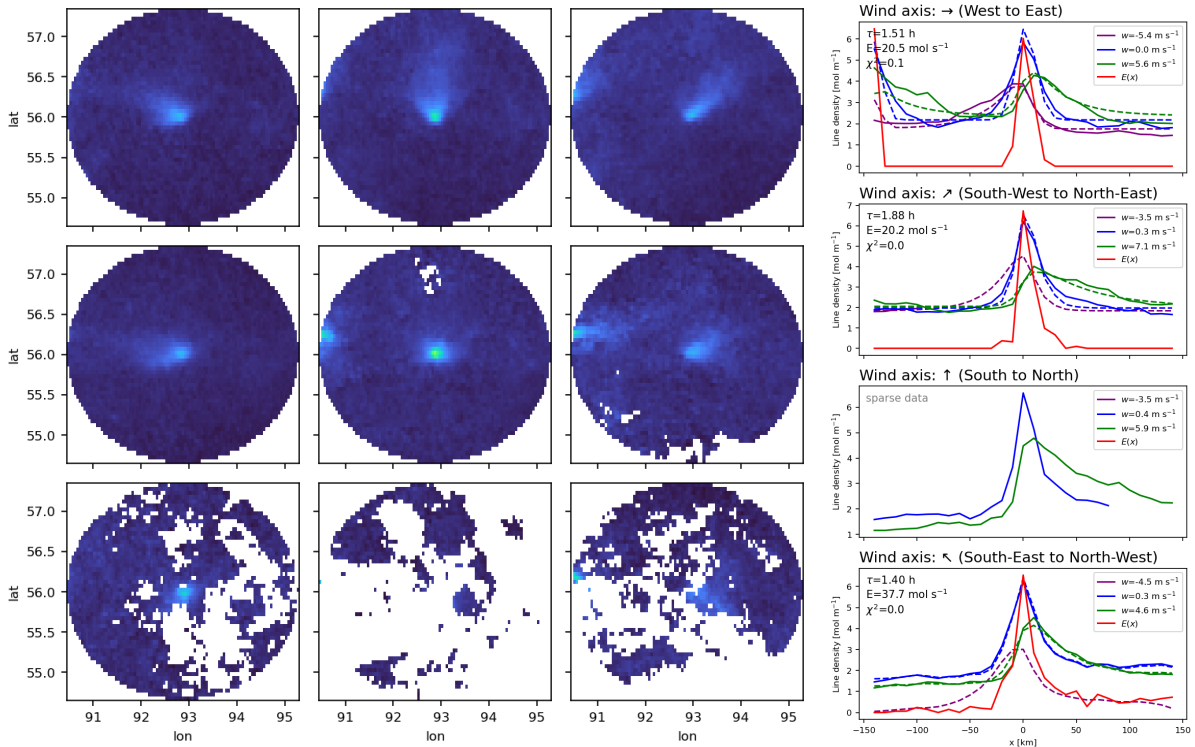

94.1 Winter

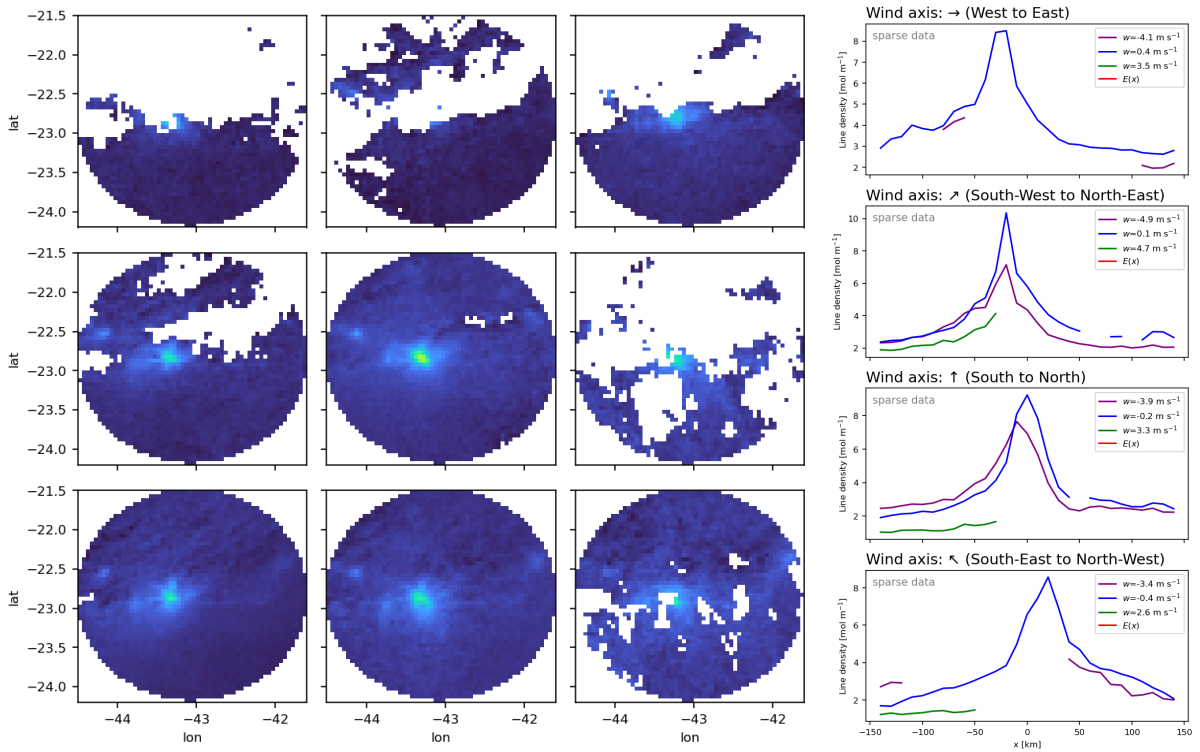

94.2 Spring

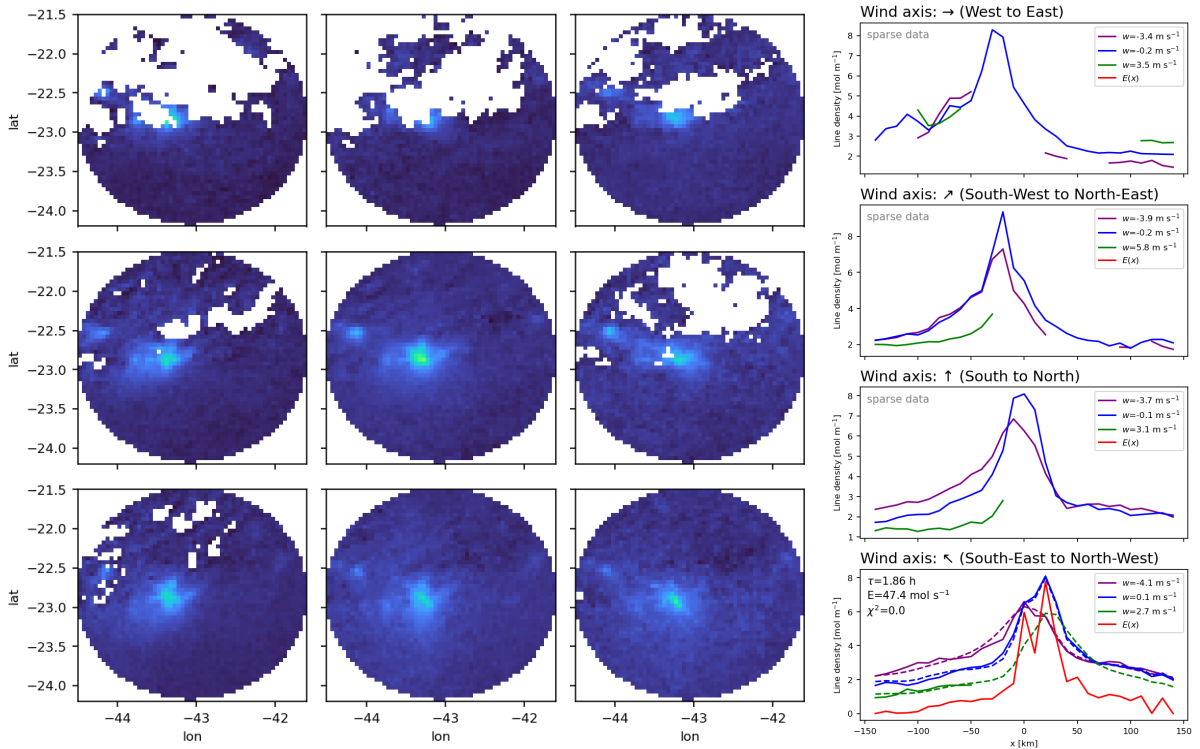

## 94.3 Summer

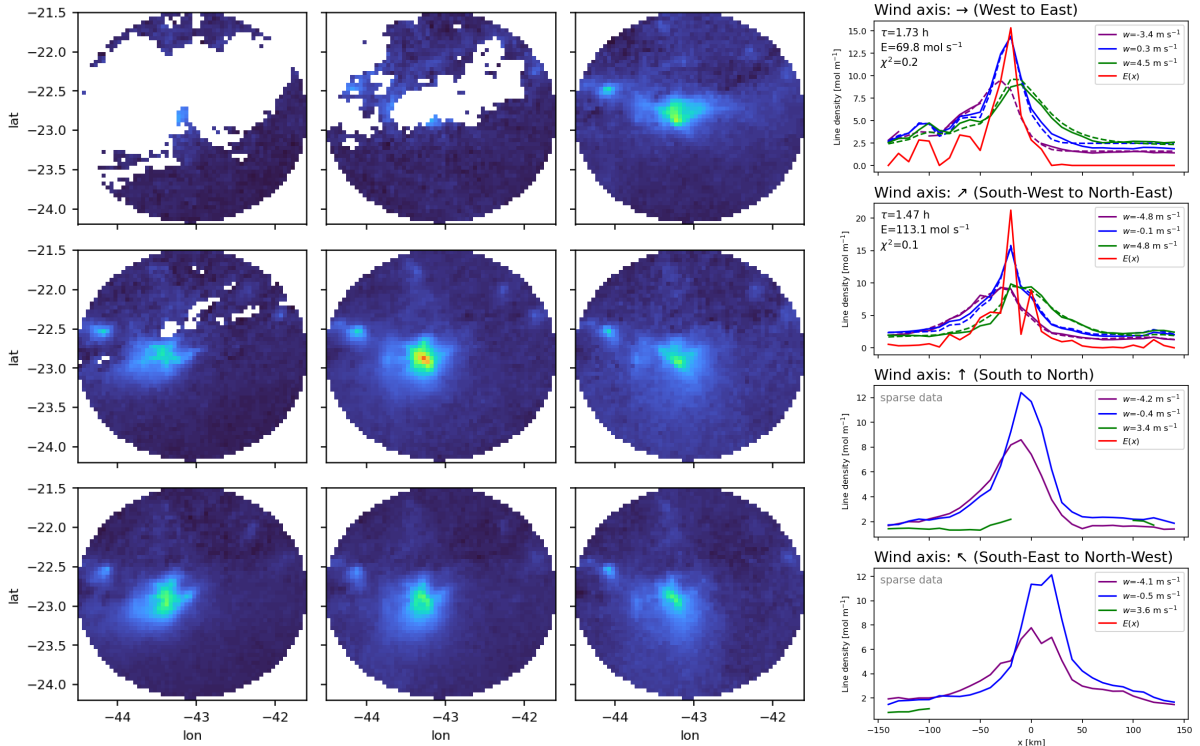

## 94.4 Autumn

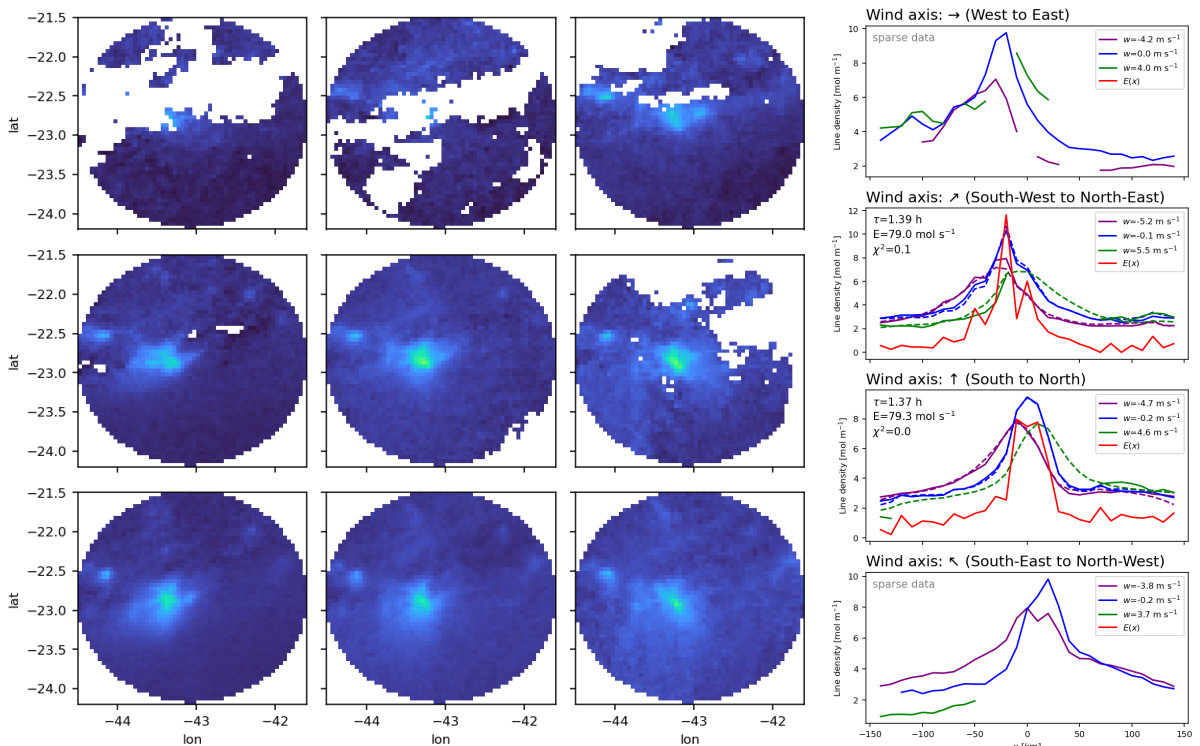

95.1 Winter

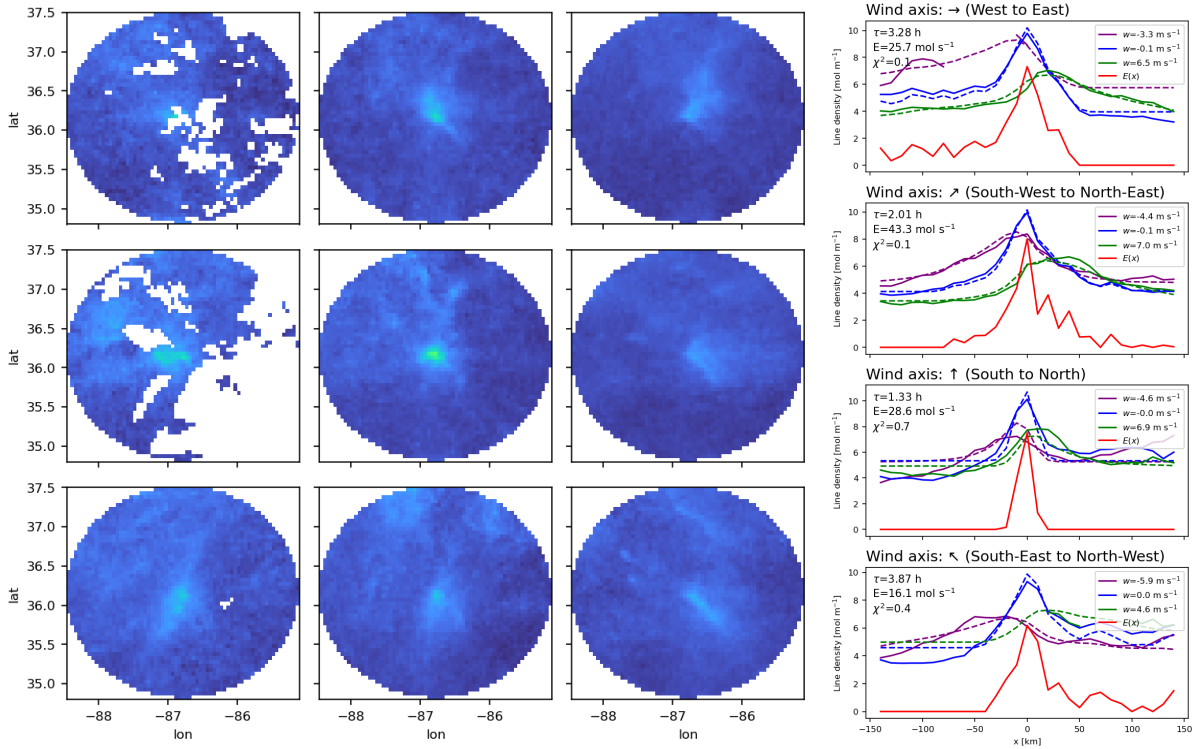

95.2 Spring

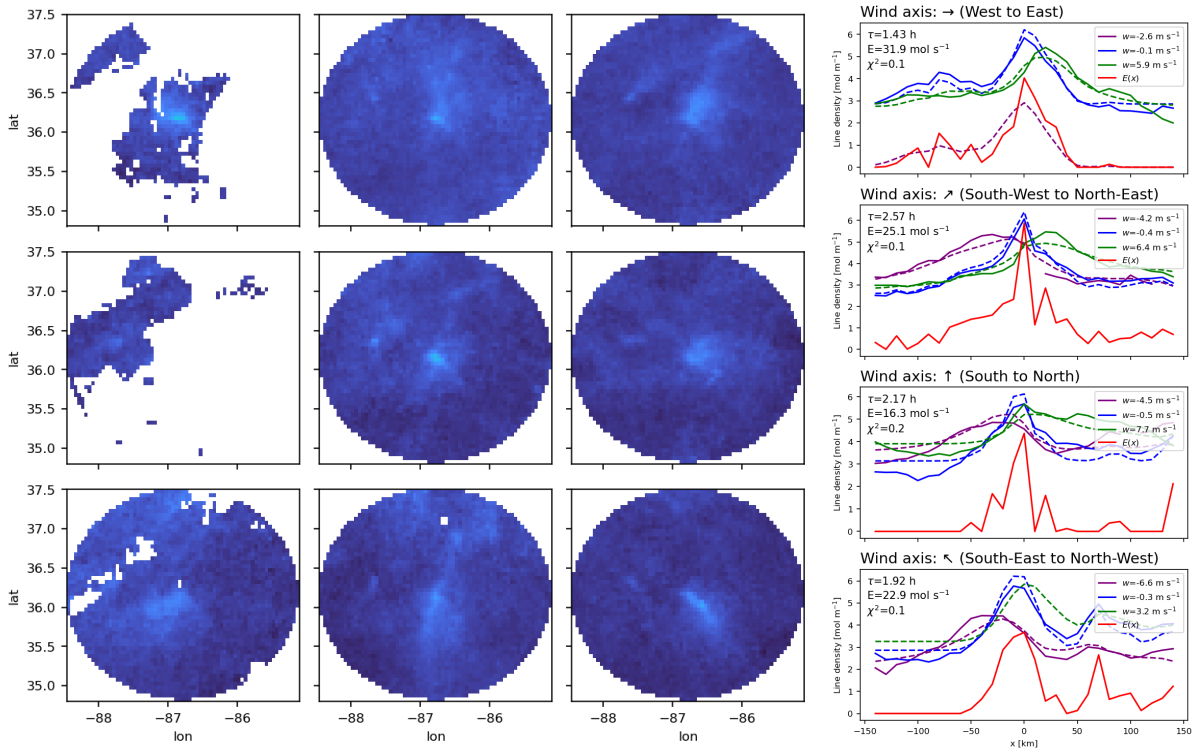

## 95.3 Summer

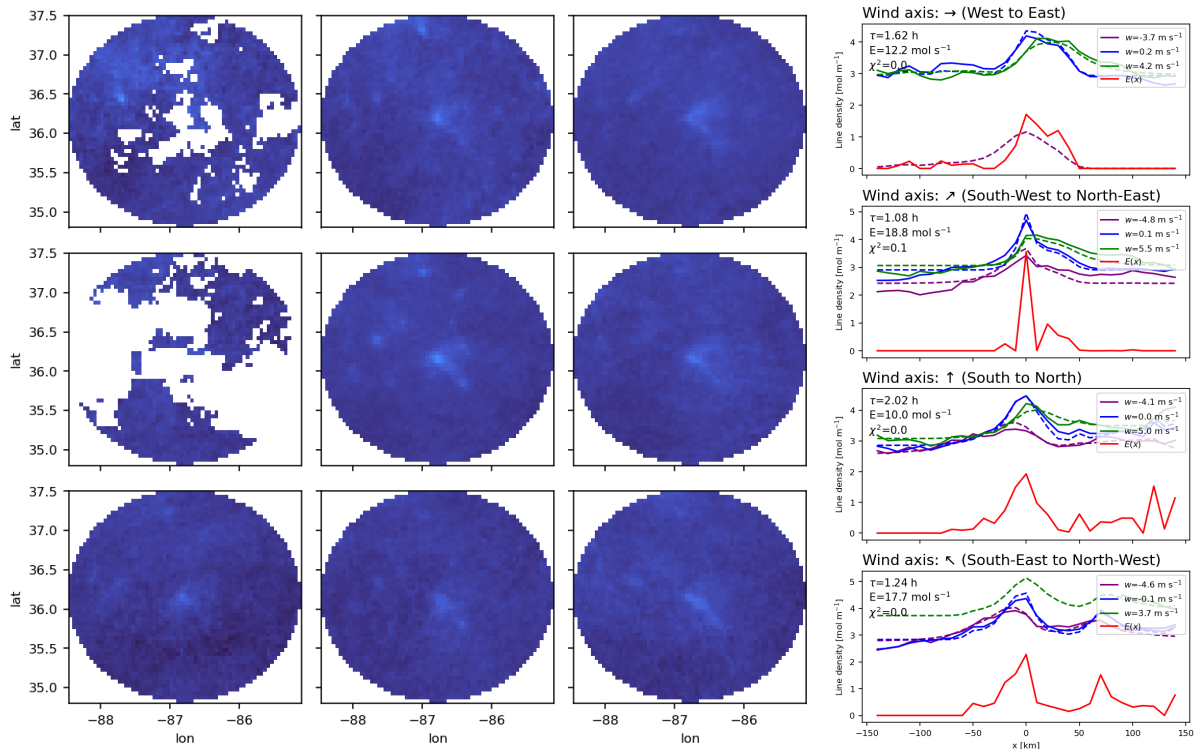

## 95.4 Autumn

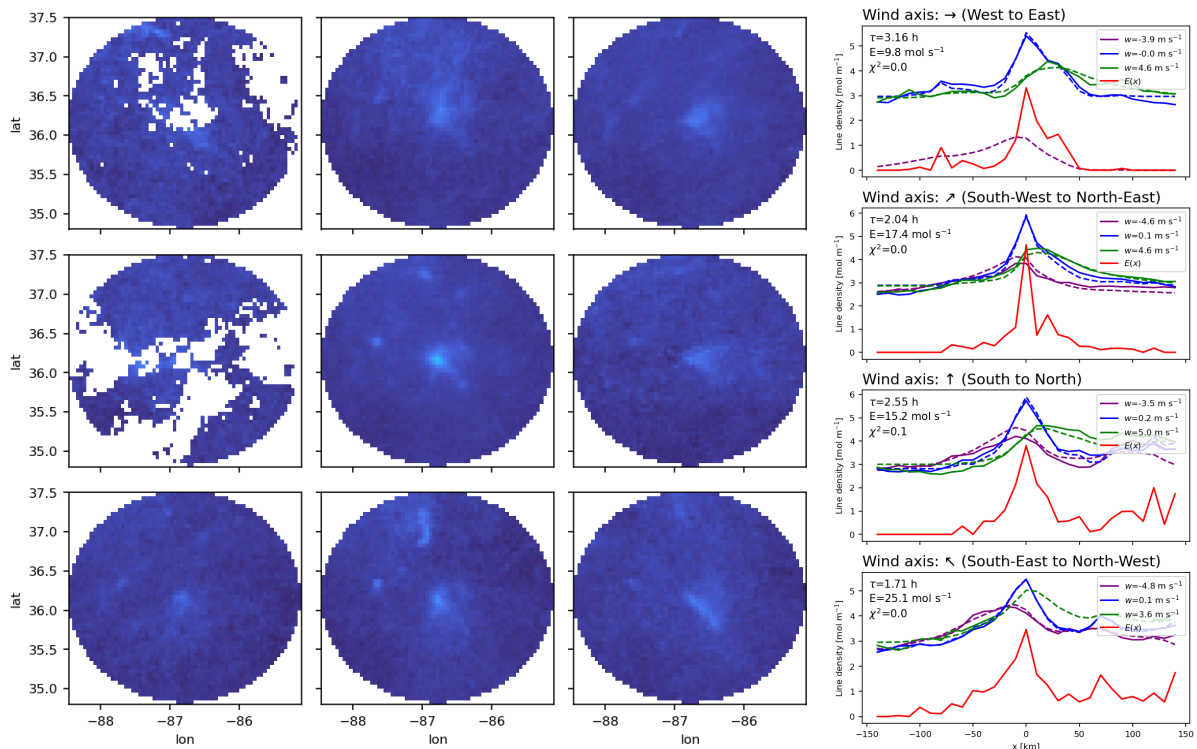



96.1 Winter

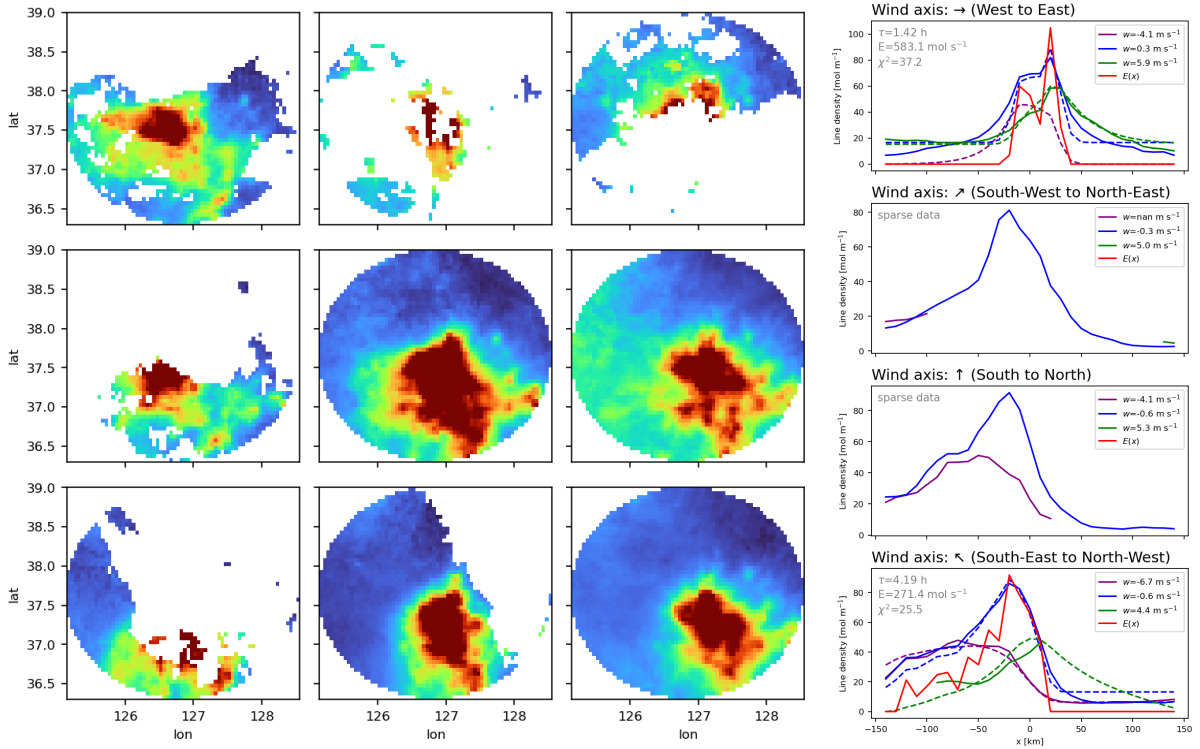

96.2 Spring

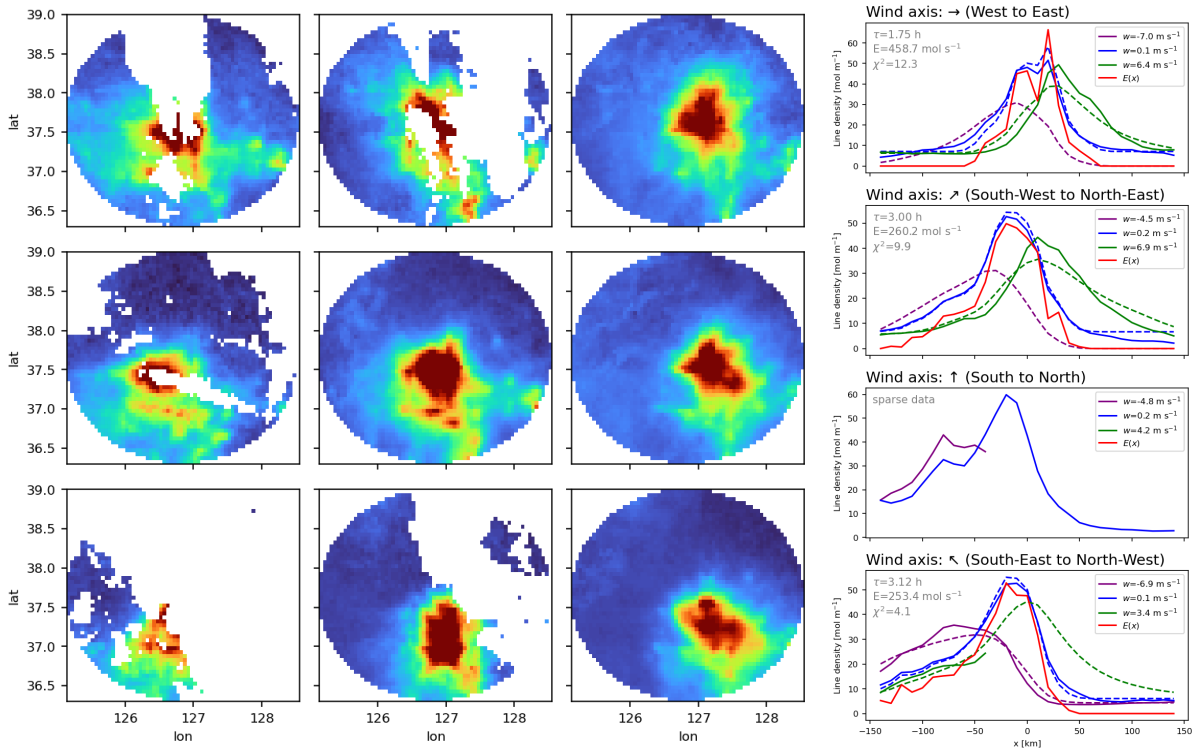

## 96.3 Summer

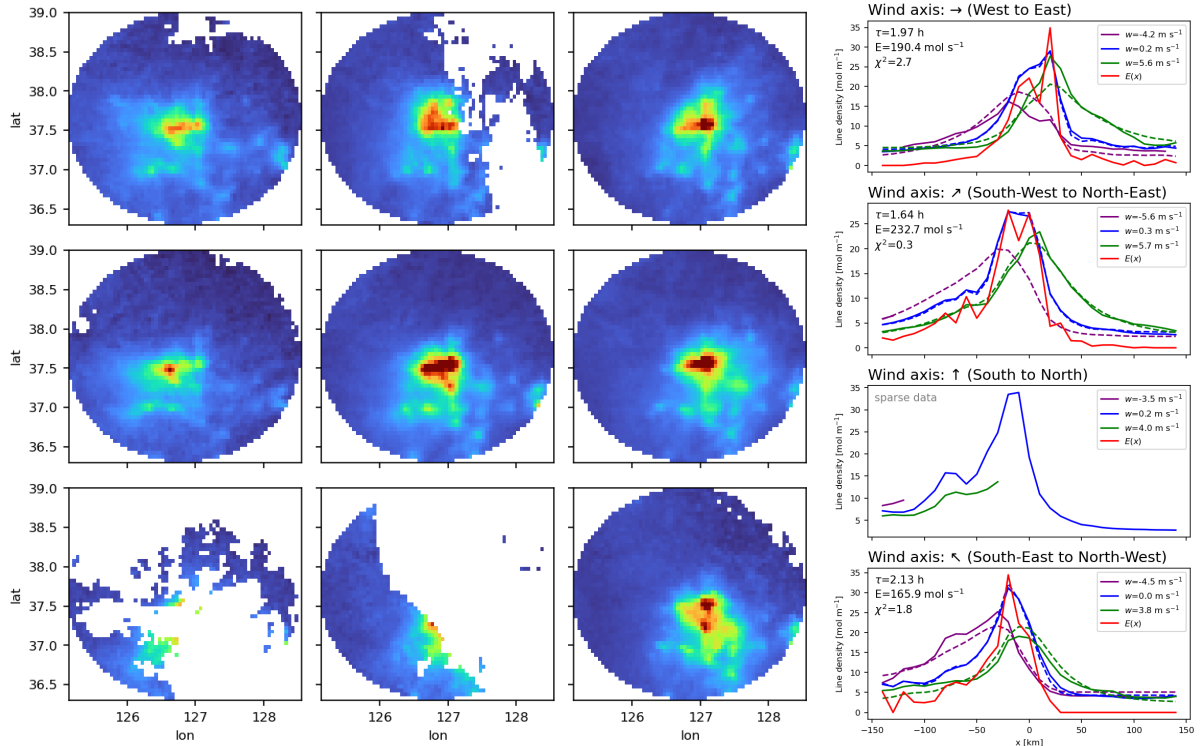

## 96.4 Autumn

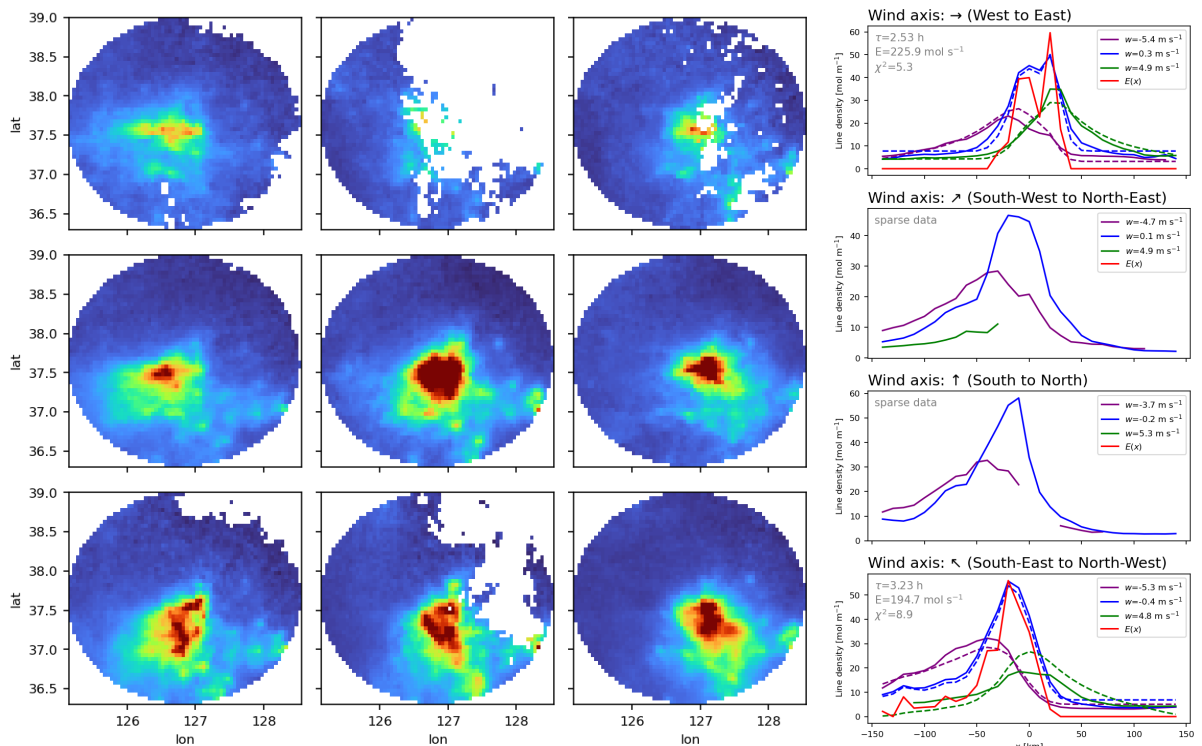

## 97 Edmonton

### 97.1 Winter

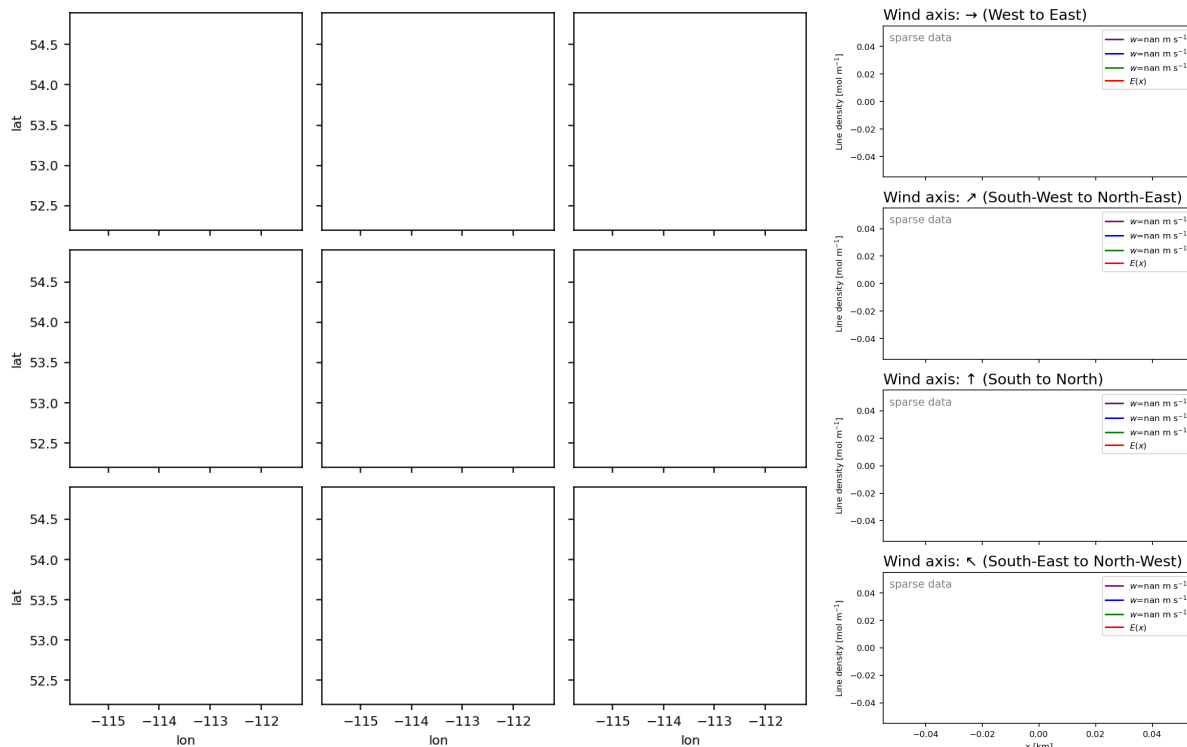

### 97.2 Spring

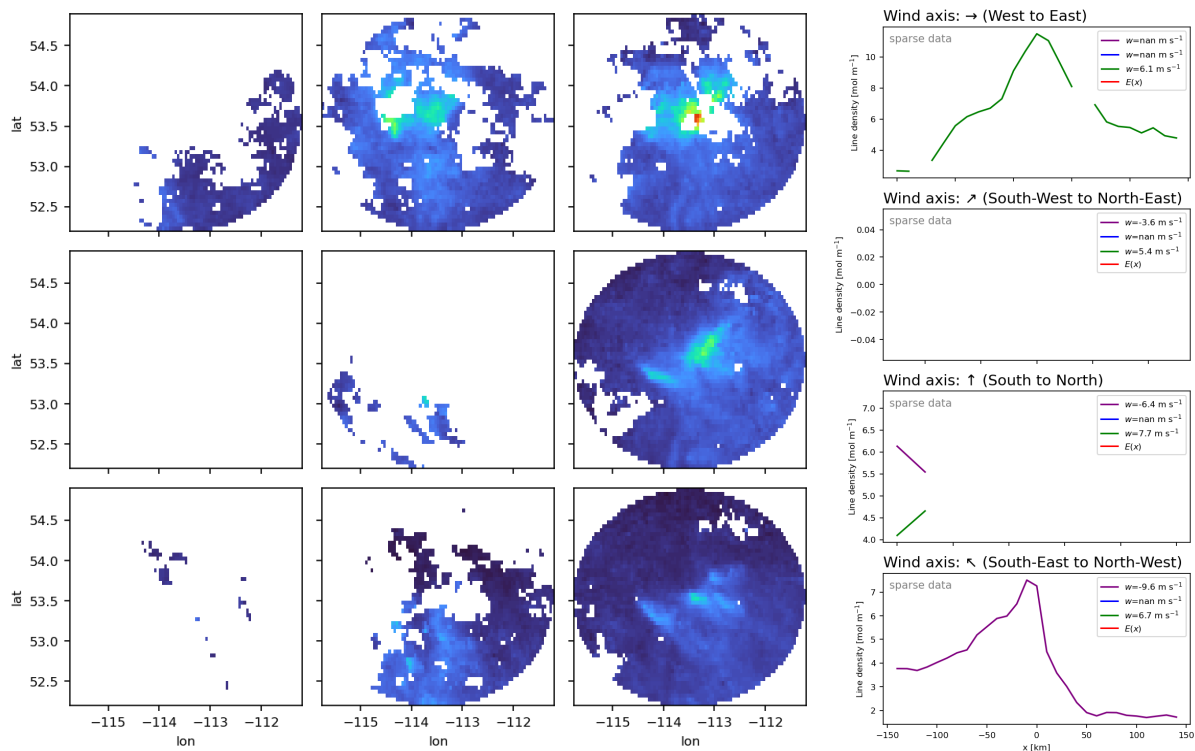

## 97.3 Summer

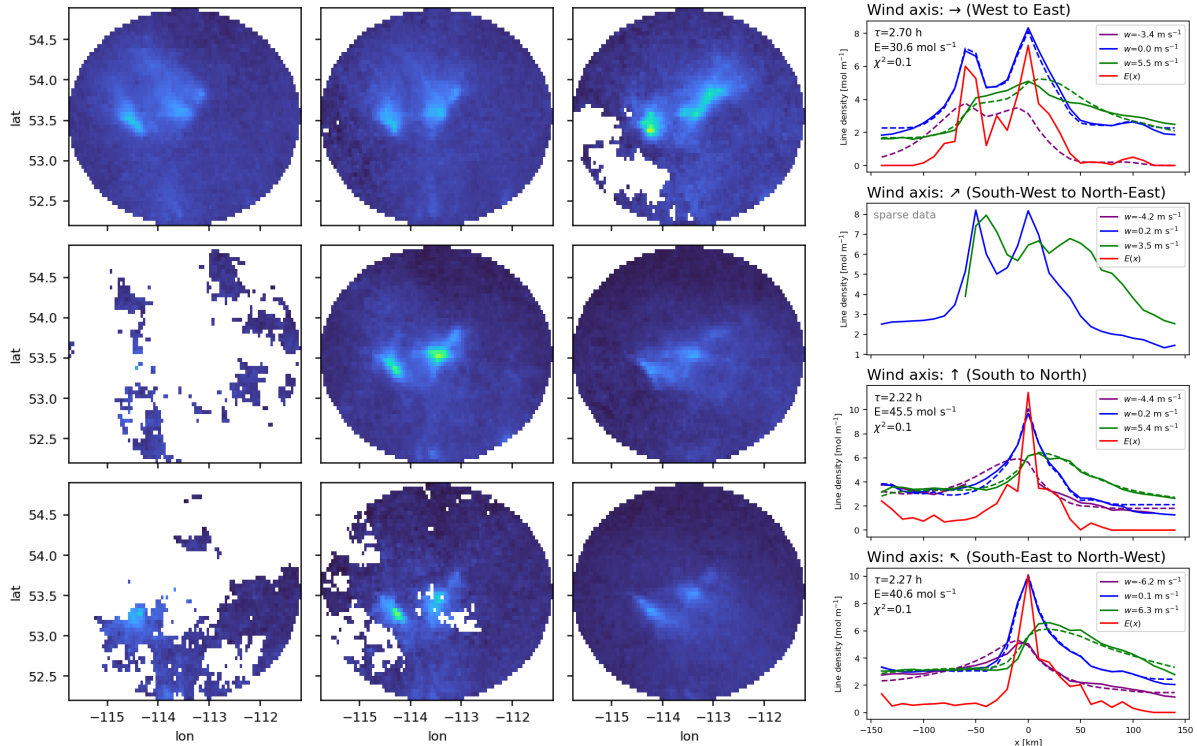

## 97.4 Autumn

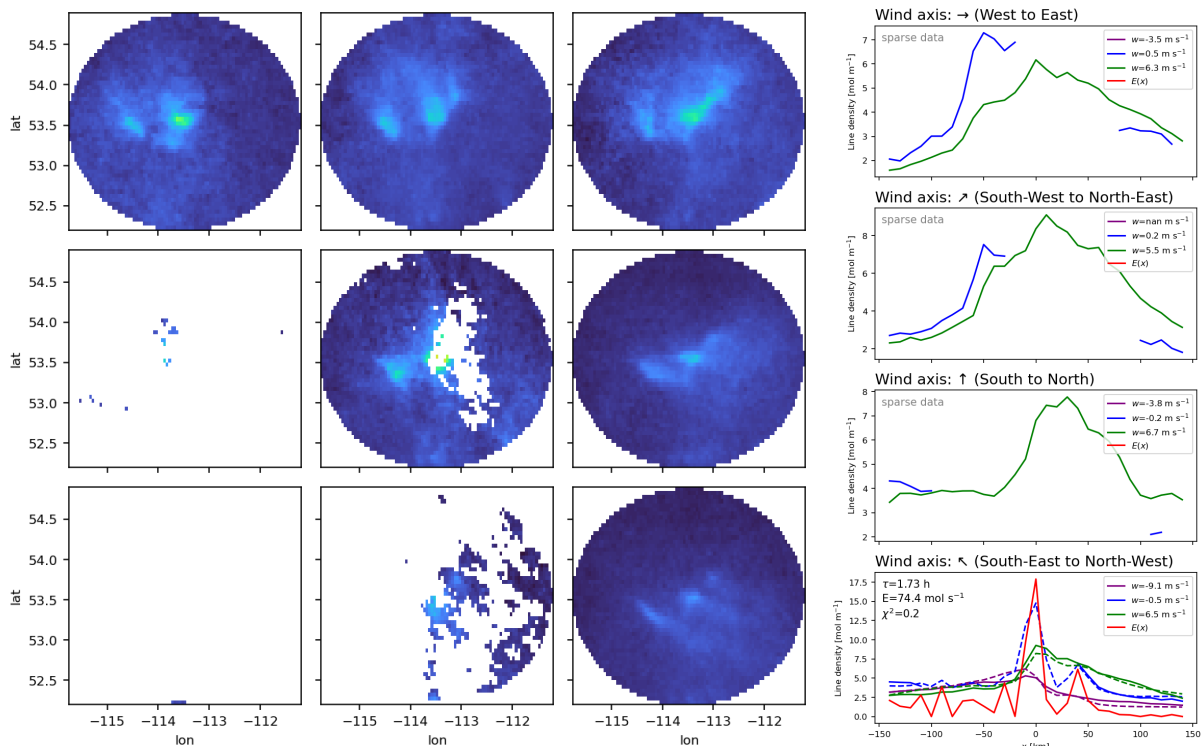

98.1 Winter

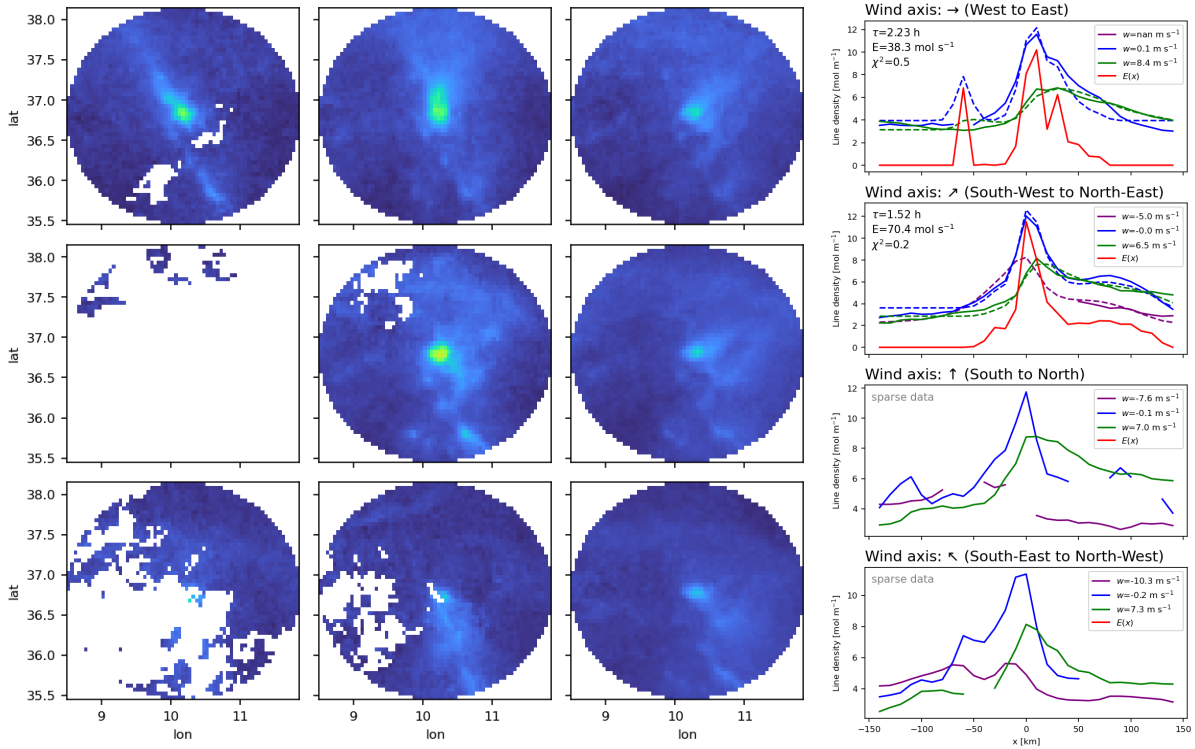

98.2 Spring

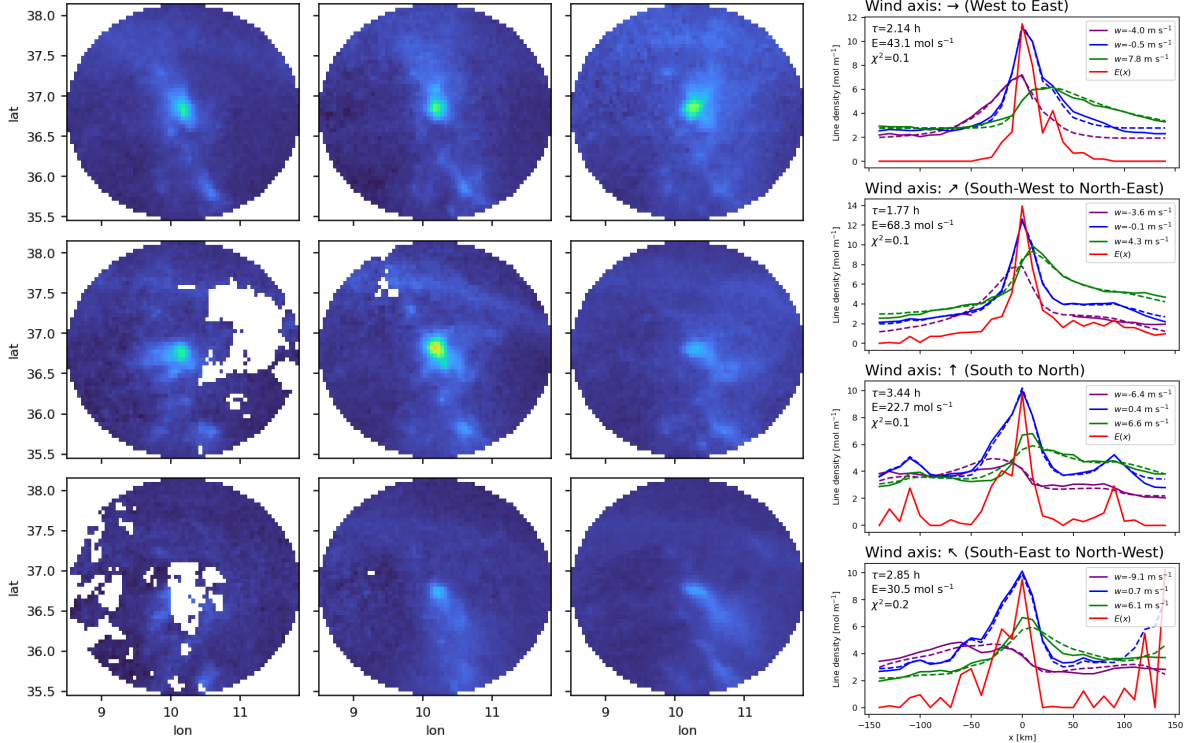

## 98.3 Summer

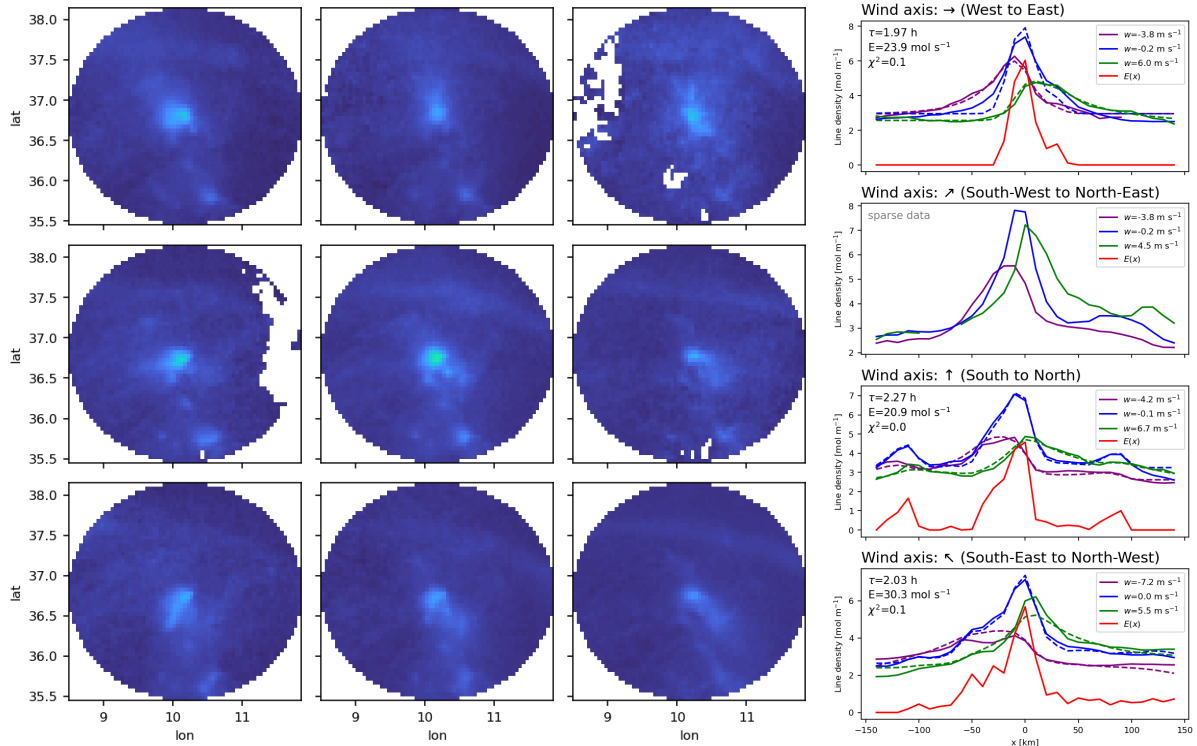

## 98.4 Autumn

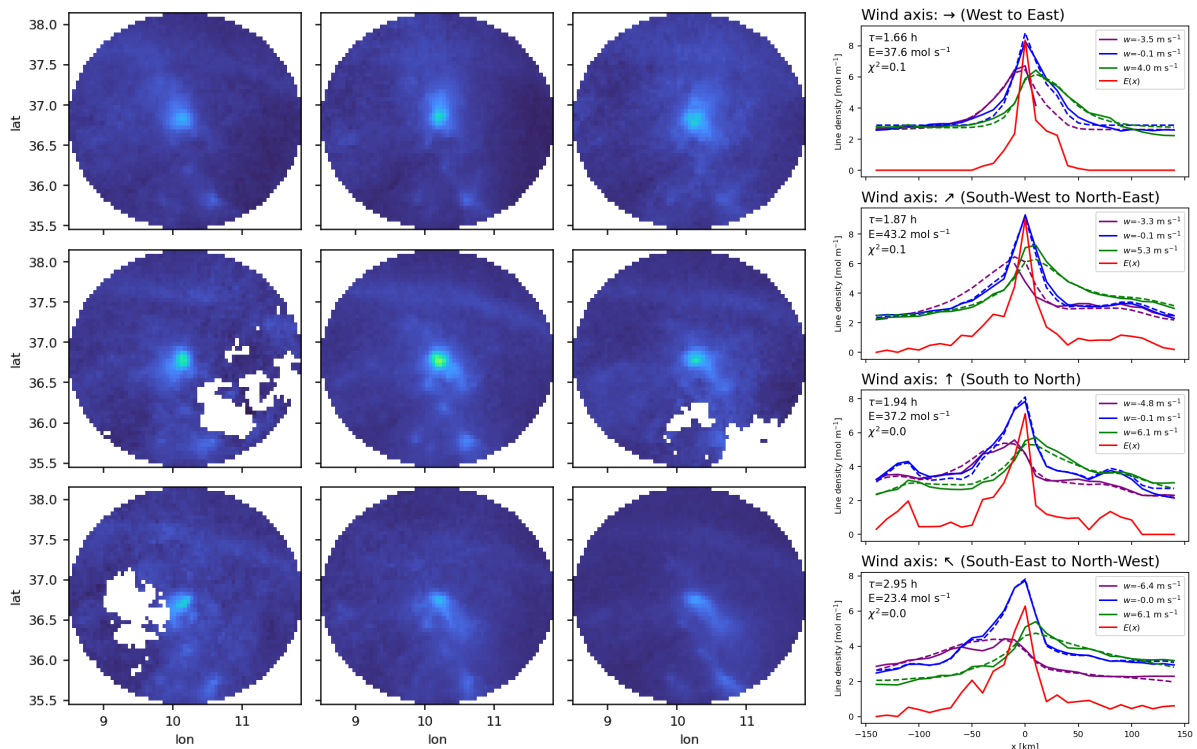

99.1 Winter

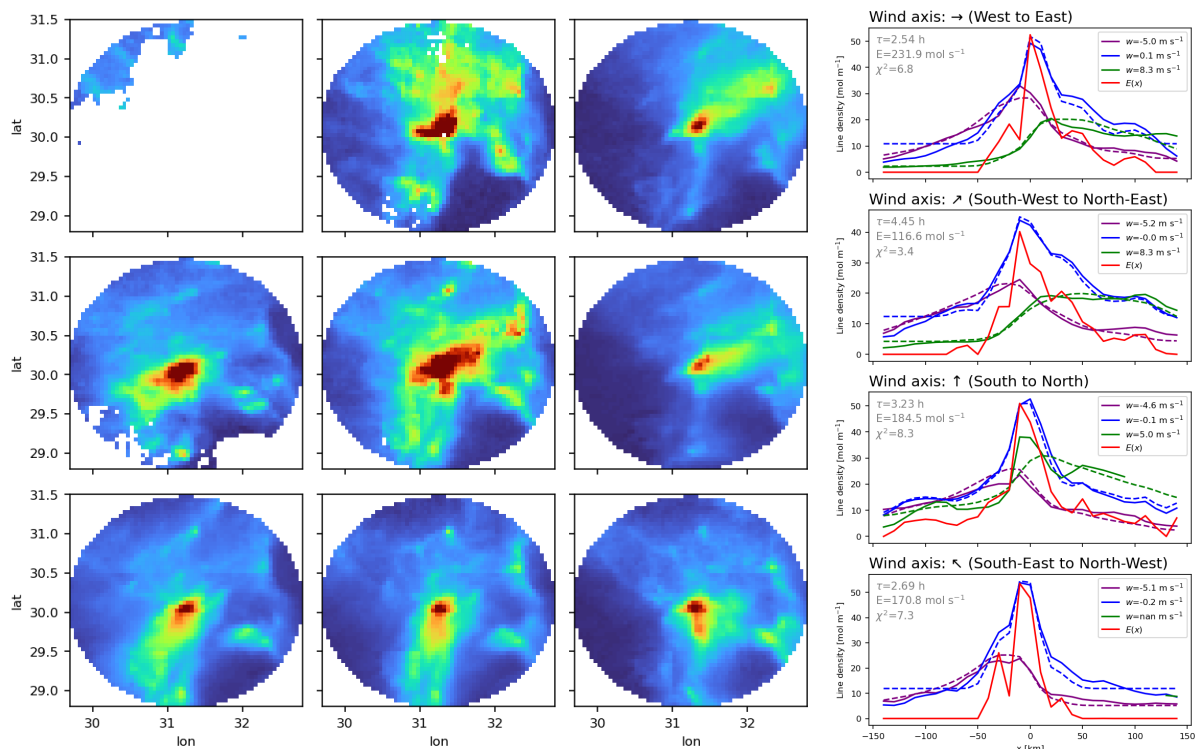

99.2 Spring

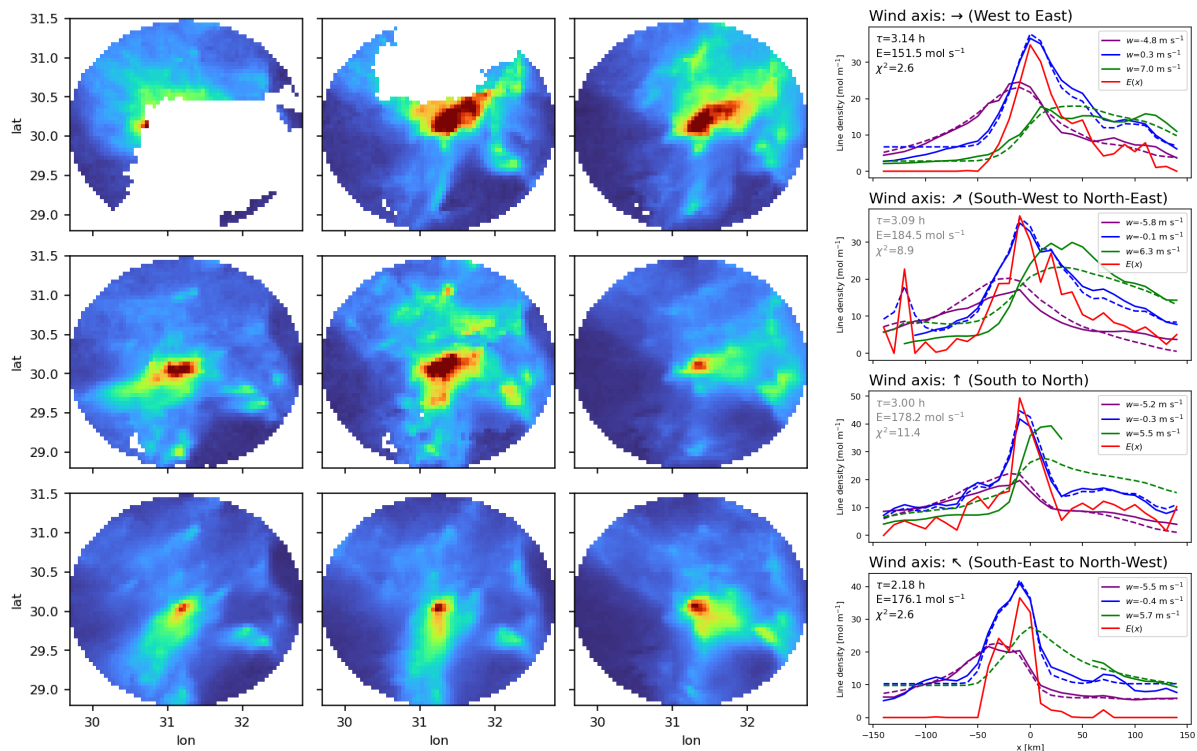

### 99.3 Summer

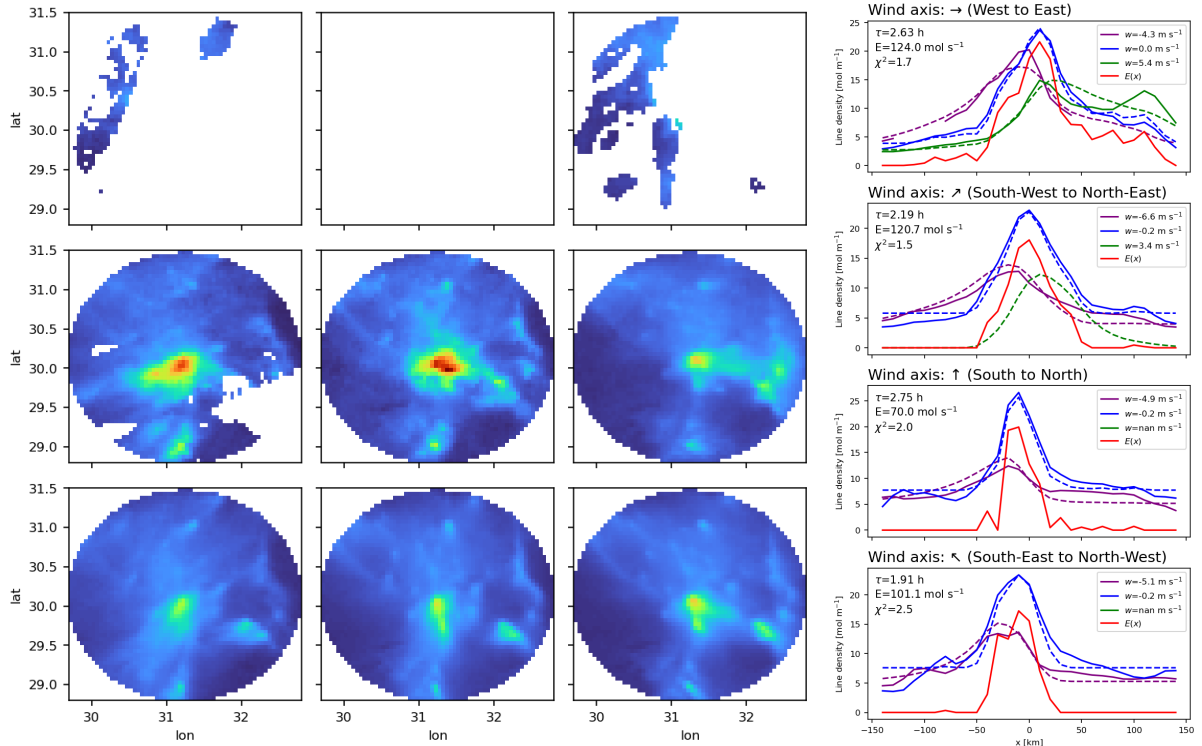

### 99.4 Autumn

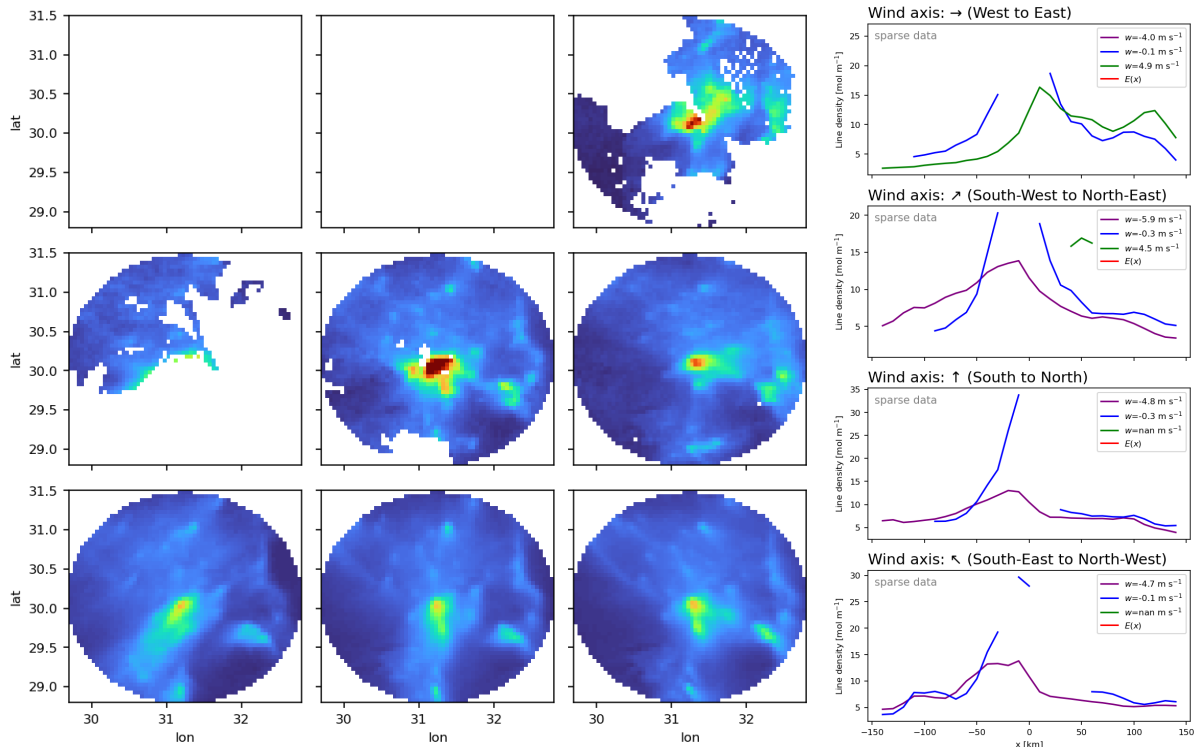



100.1 Winter

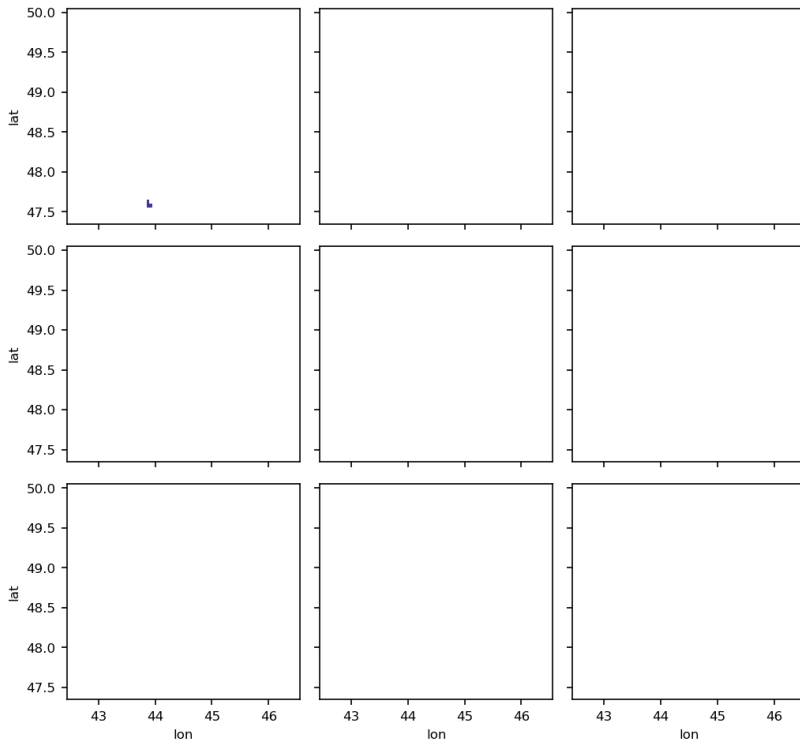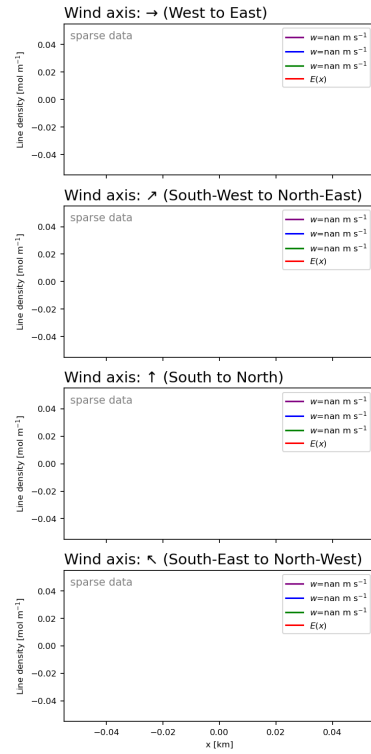

100.2 Spring

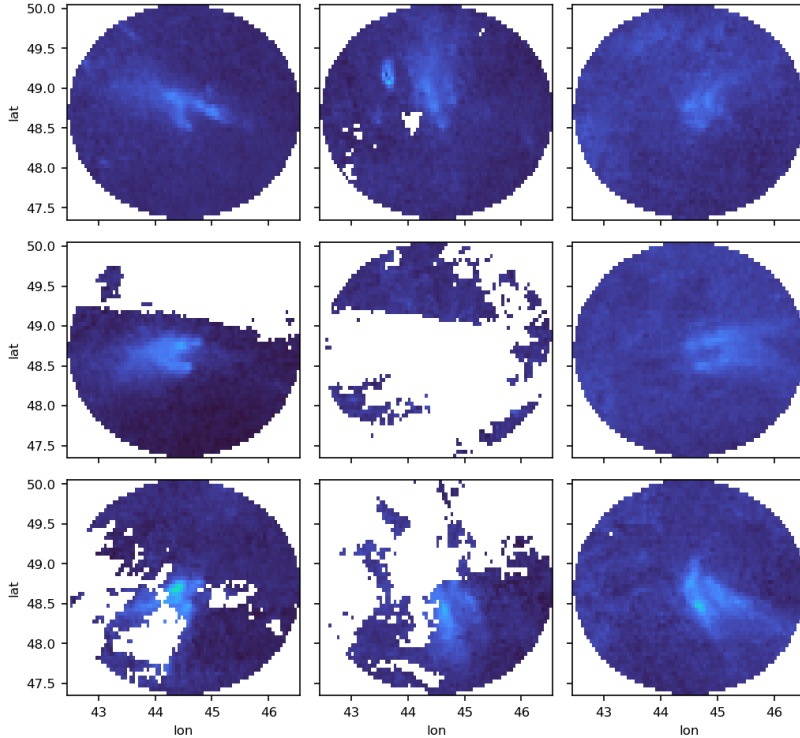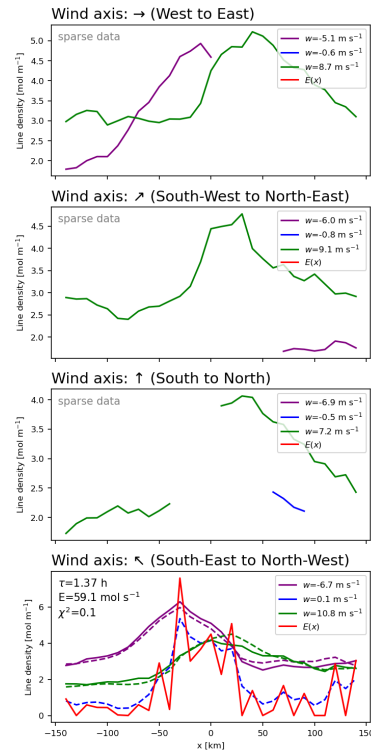

### 100.3 Summer

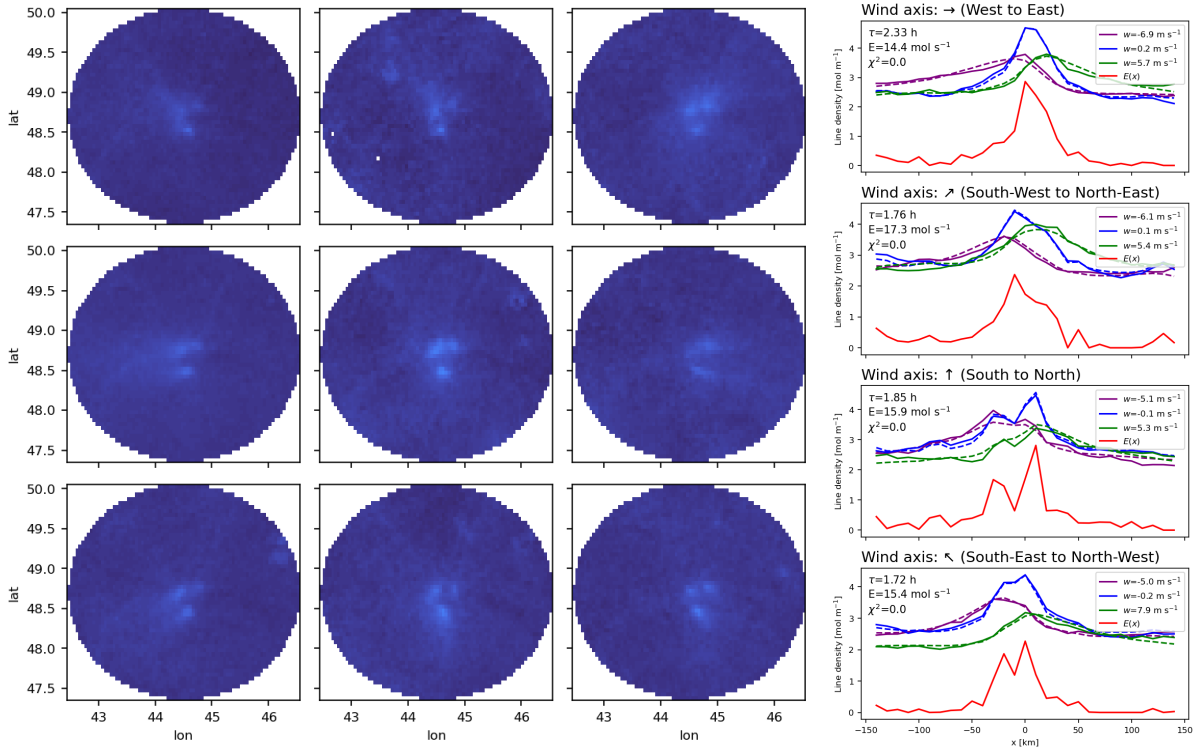

### 100.4 Autumn

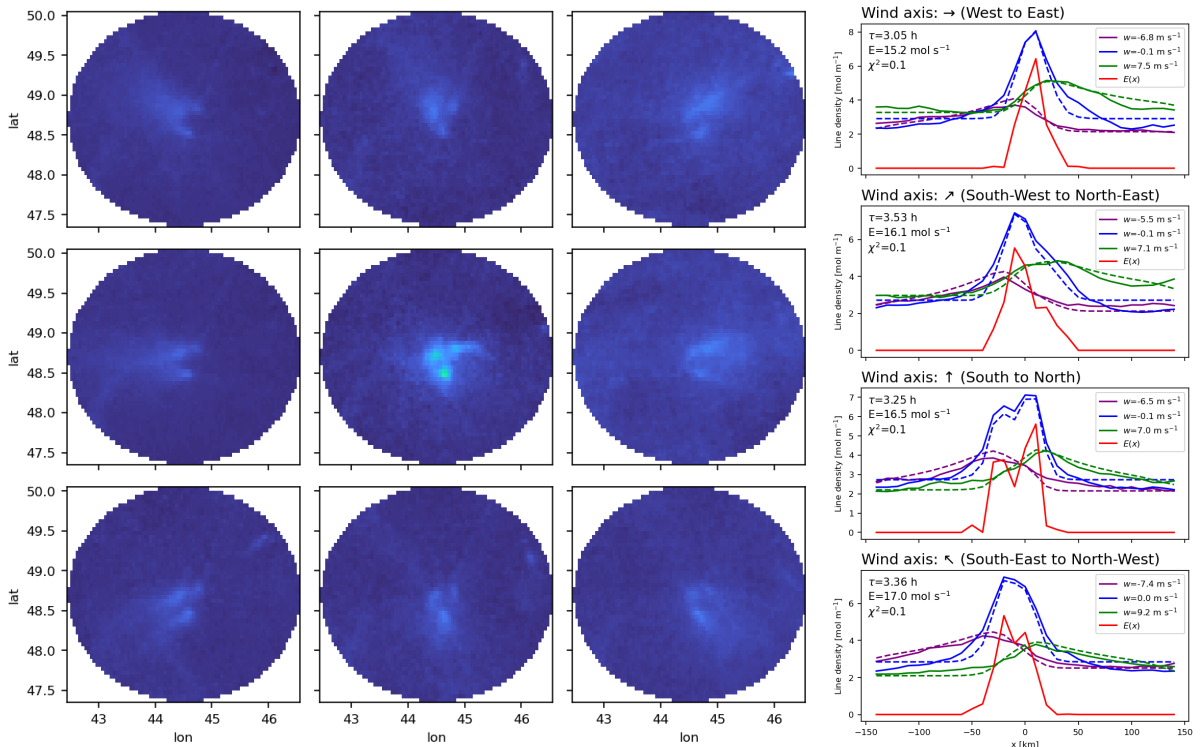

Supplement: Supplementary file 1 [file amt-17-3439-2024-supplement.pdf]
